# Supplementary material for: Laminar and Dorsoventral Molecular Organization of the Medial Entorhinal Cortex Revealed by Large-scale Anatomical Analysis of Gene Expression
Source: PLoS Comput Biol. 2015 Jan 23;11(1):e1004032. doi: 10.1371/journal.pcbi.1004032 (PMC4304787; doi:10.1371/journal.pcbi.1004032)
Supplement: S1 Dataset — (XLS) [file pcbi.1004032.s008.xls]

## Sheet: README
File contains information on expression levels of all genes in Ensembl 73 reference set or ABA.
FPKM gives RNA seq output from Cuffdiff 2
ABA gives mean pixel intensity of dorsal and ventral MEC regions of images
True and False indicate whether expression is above or below the threshold for a gene to be defined as expressed, respectively

## Sheet: Figure1
Iseries	Name	Ensembl	FPKMd	FPKMv	ABAd	ABAv	RNA?	ABA?
71161159	Mm.352566	na	na	na	0.4001	0.0	False	False
68745474	Bcl6	ENSMUSG00000022508	11.2247	12.2198	na	na	True	False
70303564	Fut9	ENSMUSG00000055373	38.135	29.1974	6.93525	3.5923	True	True
69079976	Mpi1	ENSMUSG00000032306	13.1439	12.925	40.1892	40.92495	True	True
69549326	Usp14	ENSMUSG00000047879	71.1866	69.6364	24.59145	19.21885	True	True
71393400	Hoxd13	ENSMUSG00000001819	0	0	0.0001	0.0	False	False
69549325	Irak4	ENSMUSG00000059883	0.71324	0.803384	0.4403	0.84465	True	False
69014464	Hnrph1	ENSMUSG00000007850	145.41	150.152	49.5852	46.03035	True	True
69079979	Chst12	ENSMUSG00000036599	2.94638	2.74588	53.3034	43.0234	True	True
69169433	Asph	ENSMUSG00000028207	83.0188	72.9573	3.7611	2.6491	True	True
69103487	Bzw2	ENSMUSG00000020547	5.83431	5.97387	0.802	0.3518	True	False
70795304	TC1415691	na	na	na	0.001	0.0941	False	False
583551	ORF28	ENSMUSG00000039763	4.59307	3.99424	26.6586	12.2639	True	True
74720657	Olfr124	ENSMUSG00000044985	0	0	0.00105	0.08555	False	False
71152360	Mm.207356	na	na	na	0.0994	0.1064	False	False
68668120	Cd96	ENSMUSG00000022657	0	0.0279381	na	na	False	False
74720651	Olfr1231	ENSMUSG00000075093	0	0	0.01655	0.0	False	False
69169439	Dalrd3	ENSMUSG00000019039	11.5895	12.4903	na	na	True	False
68920749	Rarres2	ENSMUSG00000009281	1.59213	1.46263	na	na	True	False
69549329	Pigb	ENSMUSG00000079469	3.80701	3.8808	0.04685	0.0022	True	False
78634031	9130214H05Rik	ENSMUSG00000021336	0	0	na	na	False	False
73617666	Gm921	ENSMUSG00000093550	0	0.01286	0.8774	1.795	False	True
69672498	Flt4	ENSMUSG00000020357	0.219229	0.201075	28.3714	29.9643	True	True
69258178	Mtnr1b	ENSMUSG00000050901	0.0185673	0	2.35375	1.1923	False	True
69012741	Crym	ENSMUSG00000030905	33.3344	57.4074	na	na	True	False
79913554	Slit2	ENSMUSG00000031558	26.3671	31.3729	na	na	True	False
68301210	Ggt1	ENSMUSG00000006345	0.48096	0.395944	na	na	True	False
576424	Ifi204	ENSMUSG00000073489	0.154075	0.138018	9.2108	9.0706	True	True
68301216	Bnip2	ENSMUSG00000011958	30.4578	29.7037	na	na	True	False
71234619	Ndst2	ENSMUSG00000039308	2.22898	2.66211	2.22045	5.63485	True	True
68342396	Lad1	ENSMUSG00000041782	0.372029	0.339098	na	na	True	False
68342390	Acads	ENSMUSG00000029545	0.218888	0.535982	1.4217	8.5891	True	True
71496233	C230078M08Rik	ENSMUSG00000034413	10.3527	10.4002	na	na	True	False
70566035	LOC229574	ENSMUSG00000049133	0	0	0.5812	0.2559	False	False
74735259	Zfp708	ENSMUSG00000058883	2.9529	2.66601	0.11595	0.0824	True	False
71496239	C330016K18Rik	ENSMUSG00000068323	0.0442983	0.0552033	1.6542	0.83195	False	True
587427	Trim11	ENSMUSG00000020455	4.65463	4.57232	5.6835	3.0277	True	True
70430858	Metrnl	ENSMUSG00000039208	2.87242	3.32263	8.503548355	9.9155425	True	True
641531	Bcl9	ENSMUSG00000038256	17.5164	20.5418	3.2803	2.5175	True	True
641530	Csnk1a1	ENSMUSG00000024576	79.6998	69.6632	53.0774	53.402	True	True
641537	Oxnad1	ENSMUSG00000021906	4.60723	3.52689	0.57645	0.37125	True	False
641536	Wbp11	ENSMUSG00000030216	21.8866	22.8891	30.6733	23.0522	True	True
641534	Bet1l	ENSMUSG00000025484	5.80484	5.86468	na	na	True	False
641539	Chrdl2	ENSMUSG00000030732	0	0.035905	na	na	False	False
70430852	Cc2d1a	ENSMUSG00000036686	3.49217	3.70237	17.6463	20.14535	True	True
79354788	Pcdhb5	ENSMUSG00000063687	1.97144	1.74092	7.07755	3.7643	True	True
75831774	Cldn9	ENSMUSG00000066720	0.0135594	0.0360738	10.0	12.1968	False	True
69442365	Zcchc7	ENSMUSG00000035649	51.5706	46.6638	29.90865	23.9971	True	True
70300589	Ntn2l	ENSMUSG00000079662	0.697447	0.623941	2.4771	1.8561	True	True
69671600	Dppa5	na	na	na	na	na	False	False
69671606	Drp2	ENSMUSG00000000223	15.9597	15.0967	35.6691	30.6362	True	True
74510104	Dpysl2	ENSMUSG00000022048	122.301	115.022	56.8252	47.8001	True	True
68563056	Cops2	ENSMUSG00000027206	63.3456	68.5736	52.5779	51.1108	True	True
70295751	Gm270	na	na	na	0.0	0.1001	False	False
70445371	Hvcn1	ENSMUSG00000064267	0.610384	0.672432	0.0	0.0	True	False
70192051	Trim23	ENSMUSG00000021712	41.5059	41.0321	18.0693	11.0669	True	True
73497204	Sall3	ENSMUSG00000024565	0.70197	0.760535	0.00155	0.0	True	False
70192057	Trim35	ENSMUSG00000022043	27.1674	28.4212	31.367	28.0154	True	True
70295757	Gm77	ENSMUSG00000008813	0	0.0401528	0.0721	0.0286	False	False
68797631	Gpr137	ENSMUSG00000024958	10.9585	10.2238	na	na	True	False
79760466	Gabrr2	ENSMUSG00000023267	0.40241	0.162298	na	na	True	False
583561	Scamp5	ENSMUSG00000040722	98.6809	99.9078	62.7064	63.1841	True	True
71489781	Timm44	ENSMUSG00000002949	14.067	16.1347	22.30945	19.7625	True	True
68269712	Grhpr	ENSMUSG00000035637	5.56411	3.95607	0.7218	0.2862	True	False
71380908	B630019A10Rik	na	na	na	63.75775	64.78335	False	True
70201594	Tsc22d2	ENSMUSG00000027806	6.2088	5.6259	0.0727	0.0655	True	False
71569175	A530021J07	na	na	na	0.1924	0.00585	False	False
71148010	Mm.123843	na	na	na	2.28415	2.71015	False	True
72002105	Stag2	ENSMUSG00000025862	13.5889	12.7209	0.0	0.00695	True	False
72002106	Stard10	ENSMUSG00000030688	4.23397	3.84849	1.9024	0.33195	True	True
71281752	2310002B06Rik	ENSMUSG00000050668	6.86718	7.49452	1.26505	0.87645	True	True
71148016	Mm.124488	na	na	na	0.1065	0.6754	False	False
71281758	Rdhe2	ENSMUSG00000028236	0	0	0.16345	0.2547	False	False
70230837	Zfp697	ENSMUSG00000050064	6.45037	5.93396	14.1549	13.8755	True	True
73748776	F830225E14RikASTERISK	na	na	na	na	na	False	False
70230831	Slc5a12	ENSMUSG00000041644	0.202757	0.170303	na	na	True	False
72471705	2610510H03Rik	ENSMUSG00000027349	16.5572	18.2305	0.1046	0.0466	True	False
72471706	Arl15	ENSMUSG00000042348	9.02868	8.14845	5.08125	0.49965	True	True
72471707	Klri2	ENSMUSG00000043932	0.00930507	0.022653	0.0981	0.0	False	False
70305532	C230029M16	na	na	na	0.0	0.0	False	False
73906479	4922505F16RikASTERISK	na	na	na	na	na	False	False
274	Clock	ENSMUSG00000029238	26.6694	25.5971	0.1577	0.02615	True	False
68499153	Pla2g12b	ENSMUSG00000009646	0	0	0.0	0.0	False	False
276	Clu	ENSMUSG00000022037	149.066	161.754	na	na	True	False
277	Clu	ENSMUSG00000022037	149.066	161.754	na	na	True	False
74736081	LOC240093	na	na	na	0.0994	0.0495	False	False
73906473	4733401D07RikASTERISK	na	na	na	na	na	False	False
70305538	C230040D14	na	na	na	0.04225	0.0	False	False
69735383	Il1r1	ENSMUSG00000026072	1.08058	1.02467	0.0	0.0	True	False
74736087	LOC241053	na	na	na	0.0799	0.0298	False	False
71210037	Mm.371966	na	na	na	0.0	0.1189	False	False
71456132	TC1495998	na	na	na	0.3464	0.0765	False	False
71210031	Mm.371905	na	na	na	na	na	False	False
532710	Oxa1l	ENSMUSG00000000959	10.6803	10.0861	6.43805	4.355	True	True
71493669	4930579C15Rik	ENSMUSG00000028575	0.822001	0.711723	0.4083	0.2179	True	False
69015218	Mapre3	ENSMUSG00000029166	65.8606	72.4779	72.9611	72.507	True	True
532712	Extl2	ENSMUSG00000027963	37.5815	30.8026	49.3703	50.6868	True	True
68745444	Dmtf1	ENSMUSG00000042508	18.8991	20.4475	21.7159	26.3525	True	True
69015212	Pzp	ENSMUSG00000030359	0.0161663	0.0130166	4.6411	4.0853	False	True
71152366	Mm.207689	na	na	na	1.5114	1.1099	False	True
68633324	Usp1	ENSMUSG00000028560	4.81446	5.17384	4.4774	5.1565	True	True
69860839	Mc2r	ENSMUSG00000045569	0.0091079	0	7.3759	11.2643	False	True
71022894	Hoxa3	ENSMUSG00000079560	0	0	8.8961	9.1925	False	True
671251	Ccdc92	ENSMUSG00000037979	37.8428	38.1078	na	na	True	False
67767473	9130005N14Rik	ENSMUSG00000029185	1.98844	2.77815	53.65945	50.1183	True	True
67767470	Cmas	ENSMUSG00000030282	50.5941	50.2594	66.8999	72.3624	True	True
67767471	Gtf3c5	ENSMUSG00000026816	3.92127	4.14209	16.7734	6.3754	True	True
74514276	LOC432876	na	na	na	0.0496	0.00215	False	False
67767474	Tceal8	ENSMUSG00000051579	44.1748	44.0688	29.01485	22.46215	True	True
71609031	Pou4f3	ENSMUSG00000024497	0	0	0.0	0.0	False	False
68499332	Cav3	ENSMUSG00000062694	0.0297112	0.0461679	na	na	False	False
69014746	Xrcc1	ENSMUSG00000051768	2.21646	3.05204	28.398	25.6271	True	True
69236891	Cacna1c	ENSMUSG00000051331	4.75036	6.01285	0.1762	0.0568	True	False
70919412	TC1560873	na	na	na	17.1933	15.3778	False	True
73906515	4930513I04RikASTERISK	na	na	na	na	na	False	False
70565861	Ifnz	ENSMUSG00000096854	0	0	4.7404	5.142	False	True
583855	Tmem144	ENSMUSG00000027956	2.90442	1.83857	na	na	True	False
583854	4933407N01Rik	ENSMUSG00000020311	17.4521	18.8849	0.1463	3.508	True	True
583853	Gtf2e2	ENSMUSG00000031585	6.19137	6.1494	na	na	True	False
583852	Ccdc106	ENSMUSG00000035228	4.50707	5.42163	6.7842	19.933	True	True
69782091	Ncor2	ENSMUSG00000029478	19.0877	19.101	24.1828	18.1402	True	True
74509572	Adam33	ENSMUSG00000027318	0.352879	0.427879	0.9378	2.8072	True	True
70445700	Dld	ENSMUSG00000020664	79.252	75.2889	31.422	27.1008	True	True
69170336	Acsm2	ENSMUSG00000030945	0	0	6.2535	4.7636	False	True
74509578	Mm.186748	na	na	na	0.26925	0.05335	False	False
583859	2610027L16Rik	ENSMUSG00000019297	1.3888	1.77389	0.2962	0.0839	True	False
583858	2700038N03Rik	ENSMUSG00000051502	2.51868	2.68941	na	na	True	False
70723128	LOC433345	na	na	na	na	na	False	False
70812883	TC1497097	na	na	na	na	na	False	False
73573145	Rshl2a	ENSMUSG00000073471	1.80517	1.90255	na	na	True	False
587424	Ptplad2	ENSMUSG00000028497	4.09435	3.59097	0.0	0.0	True	False
70813365	TC1534420	na	na	na	3.12795	1.80565	False	True
70231122	Foxi2	ENSMUSG00000048377	0	0	0.0	0.0	False	False
70474791	1110008F13Rik	ENSMUSG00000027637	18.081	16.83	0.1154	0.3472	True	False
69174421	Rpusd4	ENSMUSG00000032044	2.05473	2.12493	0.69725	0.69245	True	False
70474797	1110012L19Rik	ENSMUSG00000045237	3.34078	3.20736	0.0	0.0	True	False
69173343	D10Ertd322e	ENSMUSG00000062981	26.4184	24.55	16.7987	9.067	True	True
71022603	LOC435882	na	na	na	1.0749	1.33875	False	True
70228167	9530002K18Rik	ENSMUSG00000053729	0	0	0.0	0.0	False	False
70298286	LOC328014	na	na	na	0.12145	1.2988	False	True
71735073	Mm.259863	na	na	na	1.0666	0.65995	False	True
74514357	Scarf2	ENSMUSG00000012017	0.144334	0.231228	0.1946	0.1005	True	False
69817157	Poli	ENSMUSG00000038425	3.54024	3.80356	0.7144	0.278	True	False
70228161	9430077A04Rik	na	na	na	0.72305	1.73925	False	True
564646	Usp4	ENSMUSG00000032612	14.2754	15.1872	10.3051	10.9502	True	True
70431325	Gnb4	ENSMUSG00000027669	5.18073	5.46768	1.1338	1.4772	True	True
70523740	Adcyap1	ENSMUSG00000024256	0.324988	0.297117	na	na	True	False
68668018	Vars2	ENSMUSG00000007029	2.67569	2.2526	na	na	True	False
69258041	Kcnj3	ENSMUSG00000026824	53.7668	51.38	66.9253	57.8081	True	True
601188	1810055G02Rik	ENSMUSG00000035372	10.3315	10.988	na	na	True	False
601189	0610011L14Rik	ENSMUSG00000027628	5.2904	5.41458	na	na	True	False
68667557	Gfi1b	ENSMUSG00000026815	0.0102817	0	na	na	False	False
68798037	Cacna1d	ENSMUSG00000015968	6.39851	6.4357	na	na	True	False
69116697	Clpx	ENSMUSG00000015357	12.7906	12.1998	21.3316	17.97285	True	True
601186	Tmub1	ENSMUSG00000028958	2.88592	2.7182	na	na	True	False
601187	Tmem115	ENSMUSG00000010045	2.04331	2.06428	na	na	True	False
68798031	Grhl2	ENSMUSG00000022286	1.33577	1.38285	0.1684	0.3297	True	False
69116691	Hs6st2	ENSMUSG00000062184	10.6547	12.342	na	na	True	False
67815959	Zc3h10	ENSMUSG00000039810	0.929242	1.05763	1.456	0.06065	True	True
69407905	4930404A10Rik	ENSMUSG00000020332	0.0133797	0	0.002	0.004	False	False
68631935	Add1	ENSMUSG00000029106	74.7997	80.0556	na	na	True	False
513239	Park7	ENSMUSG00000028964	25.8129	26.189	58.73345	67.546	True	True
79354764	Cblc	ENSMUSG00000040525	0	0	5.135214285	7.147458285	False	True
513234	Trappc3	ENSMUSG00000028847	34.0965	30.5208	12.349	6.4035	True	True
513235	Clpp	ENSMUSG00000002660	6.00671	6.02804	17.3081	12.2296	True	True
67979040	Nans	ENSMUSG00000028334	1.23849	1.2332	0.0	3.0473	True	True
513233	Umod	ENSMUSG00000030963	0	0	1.5619	0.0	False	True
513230	Tmprss8	ENSMUSG00000024124	0	0.0531136	0.0	0.0	False	False
79354762	Gloxd1	ENSMUSG00000043155	0.0534389	0.0773179	0.5313	0.7025	False	False
68845592	4932438A13Rik	ENSMUSG00000037270	57.9938	48.9546	29.995	30.4444	True	True
70231260	Map3k15	ENSMUSG00000031303	0.253353	0.303351	0.11245	0.08055	True	False
70723265	LOC433459	na	na	na	2.16725	1.4609	False	True
68667934	Bmi1	ENSMUSG00000026739	12.2606	13.4387	na	na	True	False
70611359	LOC432877	na	na	na	0.1003	0.0	False	False
67815539	Egln2	ENSMUSG00000058709	6.50784	6.57083	8.9942	13.895	True	True
68845598	Mtap4	ENSMUSG00000032479	169.847	154.597	na	na	True	False
70228346	A130023E24Rik	na	na	na	0.12055	0.17855	False	False
74635439	2400003N08Rik	ENSMUSG00000066900	10.0479	10.2979	15.2754	7.85155	True	True
69838255	Bfsp1	ENSMUSG00000027420	0.117003	0.102145	0.57635	0.1406	True	False
71832793	4933422H20Rik	ENSMUSG00000070332	0	0.0161142	0.32145	0.09985	False	False
69838257	1110034A24Rik	ENSMUSG00000020973	1.38477	1.48944	0.0481	0.0652	True	False
75934519	Ctrl	ENSMUSG00000031896	0.481776	0.367121	na	na	True	False
75934516	4930417O22Rik	na	na	na	na	na	False	False
75934517	Cpxm1	ENSMUSG00000027408	1.23192	1.34358	2.52255	2.9674	True	True
75934514	Mst1	ENSMUSG00000032591	0.338292	0.118458	3.5819	2.4706	True	True
75934515	Clnk	ENSMUSG00000039315	0.207722	0.0923523	3.9493	6.736	True	True
75934512	1700052K11Rik	na	na	na	13.1798	12.84745	False	True
75934513	Tnfsf13	ENSMUSG00000089669	0.569026	0.690603	12.4499	11.6217	True	True
75934510	1700027J07Rik	na	na	na	11.7949	10.4534	False	True
77924478	Foxm1	ENSMUSG00000001517	0.394964	0.656038	2.36035	1.63455	True	True
69288962	Fem1b	ENSMUSG00000032244	34.2186	36.0813	22.3804	22.0273	True	True
73424350	Tbc1d2	ENSMUSG00000039813	0.604592	0.623592	4.2459	1.254	True	True
75931610	Tmprss11a	ENSMUSG00000072845	0	0	1.5959	0.5557	False	True
69116960	Mrpl13	ENSMUSG00000022370	11.7855	12.5242	14.63655	11.0265	True	True
638701	Rbm4b	ENSMUSG00000033760	14.8117	14.353	na	na	True	False
69288968	Fem1c	ENSMUSG00000033319	6.49247	6.17969	2.7914	2.36705	True	True
99	Ap2b1	ENSMUSG00000035152	75.0651	74.0133	na	na	True	False
71892454	Lcn5	ENSMUSG00000026937	0	0	0.0	0.0231	False	False
75214939	Rdh12	ENSMUSG00000021123	0.799932	0.636417	2.0352	1.8891	True	True
70725361	Gm1408	na	na	na	0.12245	0.1268	False	False
294039	Abcb6	ENSMUSG00000026198	4.59777	4.62192	22.2049	21.9661	True	True
93	Akap8	ENSMUSG00000024045	15.1053	14.5173	na	na	True	False
92	Akap8	ENSMUSG00000024045	15.1053	14.5173	1.6453	1.2172	True	True
95	Anp32a	ENSMUSG00000032249	44.9389	49.0856	na	na	True	False
81600118	Nmur2	ENSMUSG00000037393	0.020648	0.0237198	na	na	False	False
97	Ap2b1	ENSMUSG00000035152	75.0651	74.0133	0.247	0.4708	True	False
71808847	4930432E11Rik	na	na	na	0.0	0.0003	False	False
72471803	Gm846	ENSMUSG00000074452	0.515231	0.360502	5e-05	0.066	True	False
71789969	LOC432885	na	na	na	26.3876	20.03435	False	True
73514689	Inadl	ENSMUSG00000061859	2.28552	1.89538	0.5826	0.0792	True	False
69028491	Serpinb6a	ENSMUSG00000060147	9.03696	9.35987	19.2428	19.6833	True	True
73514683	Hspb1	ENSMUSG00000004951	0.673674	0.675821	0.00985	0.0	True	False
69169570	Wdr36	ENSMUSG00000038299	5.5272	4.97598	5.1108	2.3688	True	True
74749223	1700029I15Rik	ENSMUSG00000044916	1.90108	1.88526	0.00875	0.0935	True	False
71495710	Ift140	ENSMUSG00000024169	5.46446	6.33178	na	na	True	False
69446929	9530043G02Rik	na	na	na	0.6448	0.48615	False	False
71495716	AI847670	ENSMUSG00000047221	10.8713	10.9619	0.1463	0.2604	True	False
70276765	Etos1	na	na	na	74.1963	73.232	False	True
71495867	B230206H07Rik	na	na	na	33.50085	36.9207	False	True
69446923	9530019H20Rik	na	na	na	2.59315	1.9025	False	True
69446292	8430427H17Rik	ENSMUSG00000061411	13.9227	15.635	8.76295	7.77755	True	True
68302005	Gstt1	ENSMUSG00000001663	3.77793	3.88105	0.0	0.0941	True	False
68076548	Emp3	ENSMUSG00000040212	1.42665	1.84116	na	na	True	False
75861873	Ces6	ENSMUSG00000055730	0	0	6.06605	4.34185	False	True
69514672	Acpp	ENSMUSG00000032561	0.480365	0.535549	2.52055	5.40995	True	True
69173298	Cyp4f16	ENSMUSG00000048440	1.01433	0.8047	0.1183	0.2373	True	False
74821733	Pigk	ENSMUSG00000039047	24.8241	23.9614	8.2402	6.82225	True	True
68076542	Gins4	ENSMUSG00000031546	12.4465	12.895	2.6654	3.1879	True	True
68076543	Pla2g4a	ENSMUSG00000056220	1.05393	1.16491	0.0	0.0	True	False
68076540	Arpc1a	ENSMUSG00000029621	40.9698	39.0335	na	na	True	False
68076546	2900092E17Rik	ENSMUSG00000030680	7.07607	7.51833	34.5568	43.021	True	True
68076547	BC002163	na	na	na	15.5158	18.7475	False	True
69514678	Acrv1	ENSMUSG00000032110	0.0135841	0.0543233	na	na	False	False
68076545	4632408A20Rik	ENSMUSG00000043487	1.97874	1.87048	0.0078	0.1559	True	False
69134379	0610010K14Rik	ENSMUSG00000020831	7.61699	8.18802	30.8775	32.729	True	True
71489779	Msn	ENSMUSG00000031207	7.98665	8.46249	3.3242	2.24345	True	True
69201522	Cachd1	ENSMUSG00000028532	2.78437	3.20921	6.1853	6.20685	True	True
76003314	Mm.39644	na	na	na	na	na	False	False
69873833	Slc19a3	ENSMUSG00000038496	0.800387	0.743374	0.8787	0.06025	True	False
81600120	P2ry1	ENSMUSG00000027765	0.915508	1.76754	na	na	True	False
77910701	Pes1	ENSMUSG00000020430	2.57608	2.78013	95.7866626	100.2223285	True	True
70787615	LOC434238	na	na	na	1.5682	0.1831	False	True
69262333	Kctd20	ENSMUSG00000005936	8.59588	9.20529	na	na	True	False
69262332	Sec24d	ENSMUSG00000039234	2.004	2.73402	na	na	True	False
69262331	Esam1	ENSMUSG00000001946	1.39185	1.02563	na	na	True	False
69873929	Slc36a1	ENSMUSG00000020261	15.9935	14.2963	19.41005	13.37185	True	True
69262337	Mphosph10	ENSMUSG00000030521	12.958	13.507	10.85045	6.4185	True	True
69262336	1300012G16Rik	ENSMUSG00000029598	10.2384	8.31054	41.9604	32.083	True	True
69262335	A730098D12Rik	ENSMUSG00000035851	30.133	31.7148	32.2939	22.4893	True	True
68666935	Ints7	ENSMUSG00000037461	5.03236	5.0853	24.9621	18.4808	True	True
71587770	Grk1	ENSMUSG00000031450	0.00874554	0.00198379	0.16295	0.3659	False	False
69873295	Rps4x	ENSMUSG00000031320	21.312	22.0659	41.85845	43.6168	True	True
69672701	Gab2	ENSMUSG00000004508	6.03706	6.1955	2.04995	0.9724	True	True
73512544	E130006D01Rik	na	na	na	13.5062	4.70945	False	True
69672707	Gab3	ENSMUSG00000032750	0.881419	0.930685	14.7241	13.2404	True	True
70918892	Lgals7	ENSMUSG00000053522	0	0.0530145	0.0	0.0	False	False
70593298	Zbtb37	ENSMUSG00000043467	4.63691	4.72947	0.19655	0.05335	True	False
1811	Pigt	ENSMUSG00000017721	16.8673	19.3365	0.7522	0.3259	True	False
68844247	Chd8	ENSMUSG00000053754	42.4005	43.0941	29.4858	22.63385	True	True
68844241	Bag4	ENSMUSG00000037316	11.5483	12.3377	3.8329	7.7311	True	True
77456056	Elf1	ENSMUSG00000036461	2.05184	1.97796	3.0245	3.0141	True	True
71495950	Cdc42bpg	ENSMUSG00000024769	0.341232	0.195964	na	na	True	False
70205590	4833436C18Rik	ENSMUSG00000042788	0.328456	0.467245	7.8217	4.3889	True	True
69114932	Zdhhc19	ENSMUSG00000052363	0	0	0.2609	0.0	False	False
70205596	4833444G19Rik	na	na	na	0.2253	0.0	False	False
74427120	E330037P12RikASTERISK	na	na	na	na	na	False	False
73870692	4930588B04RikASTERISK	na	na	na	na	na	False	False
74427122	E130305I09RikASTERISK	na	na	na	na	na	False	False
1176	Cnp1	ENSMUSG00000006782	48.6344	29.4574	na	na	True	False
71492856	1700013E18Rik	na	na	na	0.1613	0.06315	False	False
1174	Chrna4	ENSMUSG00000027577	24.1521	27.522	na	na	True	False
71492850	1700007K13Rik	ENSMUSG00000026831	1.15075	1.16619	0.06355	0.04565	True	False
69114192	1700081D17Rik	ENSMUSG00000022085	0.134528	0.0335475	0.37165	0.56605	True	False
68191228	BC038822	ENSMUSG00000044250	0.948109	0.814574	1.0036	0.02795	True	True
71393406	Hoxd8	ENSMUSG00000027102	0	0	0.0	0.08995	False	False
68443226	Gpa33	ENSMUSG00000000544	0	0	0.43065	0.0315	False	False
71833026	4921509F24Rik	ENSMUSG00000031966	0	0.00575496	0.487	0.4842	False	False
75750322	Cirh1a	ENSMUSG00000041438	12.2688	13.0295	na	na	True	False
601192	Sltm	ENSMUSG00000032212	29.8617	29.7684	na	na	True	False
68191222	BC038613	ENSMUSG00000043782	0.00729994	0	0.22435	0.0	False	False
70300929	Prok2	ENSMUSG00000030069	0.16266	0.236076	80.36655	71.60715	True	True
68341609	2210412D01Rik	ENSMUSG00000038459	7.43404	8.66624	0.3541	1.607	True	True
1007	Stmn4	ENSMUSG00000022044	55.2893	50.3578	51.9083	48.8698	True	True
70812681	TC1479629	na	na	na	0.32045	0.12055	False	False
68667754	Rnf139	ENSMUSG00000037075	8.392	8.37068	0.9669	1.3209	True	True
68196929	Cstf2t	ENSMUSG00000053536	13.7992	14.9896	0.0	0.1021	True	False
68196928	Herpud2	ENSMUSG00000008429	17.1041	16.6706	0.376	0.48045	True	False
68410548	Akr1c20	ENSMUSG00000054757	0	0	na	na	False	False
510	Gnas	ENSMUSG00000027523	747.379	738.237	na	na	True	False
68196925	Hipk2	ENSMUSG00000061436	28.2107	26.7978	3.94735	3.9983	True	True
68196924	H2-Ke2	ENSMUSG00000024309	18.6293	16.9377	11.08805	6.0253	True	True
68196927	Mcam	ENSMUSG00000032135	2.23342	1.20952	5.9326	3.0398	True	True
73497786	4631422C13Rik	ENSMUSG00000024542	1.85017	2.02663	1.3786	0.5371	True	True
68410542	1700012B18Rik	ENSMUSG00000074063	0.0708401	0.121491	na	na	True	False
513	Gnb2	ENSMUSG00000029713	24.9303	27.2972	53.8026	57.0385	True	True
68196923	Pomp	ENSMUSG00000029649	119.082	107.146	20.3422	12.0721	True	True
68196922	Actr1b	ENSMUSG00000037351	79.7655	73.7618	90.4906	88.7899	True	True
69672647	Fut7	ENSMUSG00000036587	0.0424509	0.00867352	9.44065	4.38605	False	True
68667156	Setd7	ENSMUSG00000037111	54.5758	42.8674	na	na	True	False
71570738	Mtm1	ENSMUSG00000031337	4.33893	3.39071	0.0	0.0	True	False
71919158	Arv1	ENSMUSG00000031982	2.30388	2.41399	3.91135	2.6481	True	True
71570736	Mtap1a	ENSMUSG00000027254	127.43	116.337	61.8677	59.513	True	True
71891713	4930449A18Rik	na	na	na	0.0029	0.01665	False	False
68924643	Foxq1	ENSMUSG00000038415	0.303345	0.292556	32.8565	25.3247	True	True
71570735	Astn1	ENSMUSG00000026587	53.956	63.6544	60.4529	68.75975	True	True
70473927	Ndufb3	ENSMUSG00000026032	41.0737	40.8236	18.2073	13.8863	True	True
74431071	Igsf9b	ENSMUSG00000034275	10.7583	8.59873	41.2194	33.2511	True	True
71919403	1700012P22Rik	ENSMUSG00000028589	0	0	0.22615	0.3003	False	False
74427050	Prpf39	ENSMUSG00000035597	12.809	13.2108	8.632	9.00055	True	True
70593396	Tbx2	ENSMUSG00000000093	0.0810776	0.0717151	0.6314	0.07855	False	False
70305670	D16Ertd642e	ENSMUSG00000071550	0.892759	1.63409	0.2228	0.32335	True	False
69549661	Sord	ENSMUSG00000027227	2.71294	2.4438	4.4272	3.2104	True	True
68546416	Txndc9	ENSMUSG00000058407	9.89332	10.1039	na	na	True	False
70593392	Suhw2	ENSMUSG00000049764	4.38638	4.40262	14.16325	13.60745	True	True
70593393	Tbx18	ENSMUSG00000032419	0.737111	0.695266	0.7626	0.37105	True	False
79762410	Robo1	ENSMUSG00000022883	8.88344	8.8978	na	na	True	False
70305299	A530053G22Rik	na	na	na	0.0504	0.13905	False	False
71147846	LOC544728	na	na	na	0.0	0.0	False	False
69817061	Uble1b	ENSMUSG00000052997	17.8131	17.7143	38.8985	35.1288	True	True
69549669	Acp1	ENSMUSG00000044573	17.4581	16.6631	1.7477	0.656	True	True
69549668	Cnot3	ENSMUSG00000035632	15.8888	18.7366	35.4844	26.0979	True	True
70305293	A530026G17	na	na	na	0.0	0.5617	False	False
71147840	2510012J08Rik	ENSMUSG00000034889	1.74975	1.49904	0.04635	0.21275	True	False
68446075	Lect2	ENSMUSG00000021539	0.0393221	0.0182731	0.08845	0.0041	False	False
69885756	Srrm1	ENSMUSG00000028809	73.3842	73.5289	58.1105	69.0876	True	True
74734932	Olfr745	ENSMUSG00000050028	0	0	0.0818	0.0929	False	False
1226	Mbp	ENSMUSG00000041607	438.366	241.103	na	na	True	False
68744821	Adamtsl5	ENSMUSG00000043822	1.32733	0.846435	4.9143	2.804	True	True
71493002	Mapk1ip1	ENSMUSG00000041775	11.9189	12.478	0.37485	0.1166	True	False
69290740	Zbtb3	ENSMUSG00000071661	0.600632	0.632415	2.02415	1.3426	True	True
621	L1cam	ENSMUSG00000031391	55.7535	67.5158	2.7416	3.5098	True	True
68744827	Ict1	ENSMUSG00000018858	25.929	24.6874	51.5614	53.6333	True	True
74734938	Olfr750	ENSMUSG00000035932	0	0	0.00265	0.0	False	False
69736076	Ldha	ENSMUSG00000063229	125.356	141.852	83.4159	77.66515	True	True
69873439	Scfd2	ENSMUSG00000062110	6.77438	5.16955	0.0064	0.0	True	False
71210583	Otop1	ENSMUSG00000051596	0	0	0.1795	0.00705	False	False
71210852	Acot3	ENSMUSG00000021228	0.703475	0.60718	0.0	0.0	True	False
73497568	Gm1008	ENSMUSG00000056824	0.0267616	0	0.0445	0.07395	False	False
70218360	4930555G01Rik	ENSMUSG00000096197	0	0	29.7248	29.7564	False	True
71210858	Acot4	ENSMUSG00000052392	0.987218	1.04378	0.0	0.2997	True	False
70218366	4930555I21Rik	ENSMUSG00000028801	1.4393	2.4312	2.2821	3.44115	True	True
70946160	Prkx	ENSMUSG00000035725	4.95833	4.67674	2.2975	3.7054	True	True
626	Lsamp	ENSMUSG00000061080	72.6887	80.0706	na	na	True	False
70300067	LOC382902	na	na	na	4.20935	7.4469	False	True
69735664	Jph1	ENSMUSG00000042686	4.37231	3.70864	20.1569	20.1736	True	True
641538	Tdp1	ENSMUSG00000021177	6.59676	5.84338	0.0	0.0	True	False
74431098	Afm	ENSMUSG00000029369	0.104291	0.0801774	0.5432	0.80365	True	False
74359682	Atp11a	ENSMUSG00000031441	24.6213	25.791	na	na	True	False
69816607	Hspa1a	ENSMUSG00000091971	1.13849	0.93218	na	na	True	False
68924425	Wdtc1	ENSMUSG00000037622	9.99289	8.93131	29.253	32.2044	True	True
624	Lamc1	ENSMUSG00000026478	7.00862	7.4189	na	na	True	False
71610865	Elovl5	ENSMUSG00000032349	21.8044	20.4565	0.9607	0.71525	True	False
70528665	Fkbp2	ENSMUSG00000056629	44.7255	41.7346	58.4573	58.4202	True	True
69837407	Adam11	ENSMUSG00000020926	18.0586	18.3602	59.2877	58.5084	True	True
69837406	4933426K21Rik	ENSMUSG00000040649	7.9737	11.1741	5.3545	10.9584	True	True
2658	Tat	ENSMUSG00000001670	0	0	8.9576	17.5848	False	True
2742	Zfp238	ENSMUSG00000063659	67.0966	52.0149	na	na	True	False
69514588	Abcb4	ENSMUSG00000042476	0.31001	0.344721	na	na	True	False
71809521	E330026B02Rik	ENSMUSG00000043719	0.0372661	0.0144756	0.33295	0.1616	False	False
77923668	Jup	ENSMUSG00000001552	7.9488	6.89633	na	na	True	False
76003326	Stch	ENSMUSG00000032932	14.0919	15.294	3.7652	4.1715	True	True
69782282	Nmnat2	ENSMUSG00000042751	35.5405	34.3691	47.3673	41.73215	True	True
68638089	Tmprss6	ENSMUSG00000016942	0.0363498	0.033251	na	na	False	False
80473485	Rabggtb	ENSMUSG00000038975	44.2428	44.2521	na	na	True	False
2744	Zfp358	ENSMUSG00000047264	3.00445	3.42705	40.0473	39.1225	True	True
74431679	Prmt6	ENSMUSG00000049300	3.47795	3.47751	0.16505	0.08645	True	False
73906286	A230044A09RikASTERISK	na	na	na	na	na	False	False
69736388	Lzts1	ENSMUSG00000036306	3.24929	3.86008	na	na	True	False
73906280	A330072N08RikASTERISK	na	na	na	na	na	False	False
71211665	mCG16253.1	na	na	na	na	na	False	False
69540435	Cbln4	ENSMUSG00000067578	57.4891	63.7525	na	na	True	False
71022678	LOC436240	ENSMUSG00000071665	0.260693	0.363871	1.3333	0.8004	True	True
576437	Ube2d1	ENSMUSG00000019927	43.7785	36.7029	19.20345	12.9423	True	True
71211483	mCG140353	na	na	na	0.5638	0.2617	False	False
576431	Ercc1	ENSMUSG00000003549	7.0598	6.36471	53.0286	46.3249	True	True
69736382	Lyst	ENSMUSG00000019726	6.97744	6.37096	13.2643	5.2164	True	True
576432	Ppp1r1b	ENSMUSG00000061718	10.7516	6.29986	59.1782	53.22475	True	True
71891868	4930524O08Rik	na	na	na	0.06125	0.0	False	False
71493675	4930588G17Rik	na	na	na	0.03205	0.088	False	False
74359359	2310001K24RikASTERISK	na	na	na	na	na	False	False
68845359	Smarcad1	ENSMUSG00000029920	8.11474	8.7289	0.7267	1.55805	True	True
79756317	Slc44a2	ENSMUSG00000057193	6.52641	6.54111	na	na	True	False
69080020	Psmb6	ENSMUSG00000018286	28.5155	30.1287	28.81325	25.87035	True	True
74359353	2210020H01RikASTERISK	na	na	na	na	na	False	False
71891862	4930470P17Rik	na	na	na	0.055	0.0	False	False
532700	Lztfl1	ENSMUSG00000025245	27.9301	28.9137	0.0994	0.1696	True	False
532707	Susd2	ENSMUSG00000006342	1.01817	1.13163	10.5311	5.8956	True	True
74359425	2610304F08RikASTERISK	na	na	na	na	na	False	False
73811525	A730023A08RikASTERISK	na	na	na	na	na	False	False
70201450	1700042G07Rik	ENSMUSG00000078593	0	0	0.8506	1.0868	False	True
70546117	Smcp	na	na	na	14.571	8.5019	False	True
77793211	BC048943	ENSMUSG00000091402	0.271905	0.117413	na	na	True	False
2318	Il17rb	ENSMUSG00000015966	0.816116	0.631022	na	na	True	False
68498944	9130218E19Rik	na	na	na	na	na	False	False
70546111	Mapbpip	ENSMUSG00000028062	18.9964	18.1256	4.19965	2.40465	True	True
71496007	Bst1	ENSMUSG00000029082	0.0247921	0.033976	0.0	0.0	False	False
71161090	Mm.349143	na	na	na	0.2121	0.0851	False	False
69113865	Ropn1	ENSMUSG00000022832	0.0217536	0.0902954	0.0	0.08675	False	False
71920273	Ins2	ENSMUSG00000000215	0	0	0.06485	0.08855	False	False
70565551	F730043H23	na	na	na	9.32085	6.86415	False	True
73808450	9530020O07RikASTERISK	na	na	na	na	na	False	False
71764512	Rpl13a	ENSMUSG00000074129	12.4137	15.5676	69.2676	69.72925	True	True
70445287	Uhrf2	ENSMUSG00000024817	26.0908	27.1864	5.79395	6.91835	True	True
70228209	9630008K15Rik	ENSMUSG00000044681	0.0177619	0	0.0	0.0713	False	False
70565557	Fhod3	ENSMUSG00000034295	10.0061	8.28662	na	na	True	False
73808456	9430065L06RikASTERISK	na	na	na	na	na	False	False
71764518	Tatdn2	ENSMUSG00000056952	6.55518	6.53375	58.5158	55.678	True	True
69114447	Dbil5	ENSMUSG00000038057	0.45887	0.283337	0.0072	0.1222	True	False
71280544	St3gal1	ENSMUSG00000013846	10.7402	14.8133	17.94245	22.9319	True	True
69114441	4930503B20Rik	ENSMUSG00000090202	0.0244581	1.71094e-06	1.1059	2.966	False	True
71892442	A030005K14Rik	na	na	na	0.0	0.0	False	False
69114334	Tuba7	ENSMUSG00000067702	0	0.0105591	56.4251	46.9176	False	True
71669003	LOC436114	na	na	na	0.0	0.0	False	False
293246	Lztr1	ENSMUSG00000022761	33.977	30.2517	na	na	True	False
71669001	LOC433932	na	na	na	0.0571	0.0858	False	False
71669000	LOC433253	na	na	na	0.0	0.0	False	False
73514905	Rnase13	ENSMUSG00000068392	0.0825281	0	0.0226	0.0	False	False
71669006	B230396O12Rik	ENSMUSG00000046637	0.465807	0.499492	0.075	0.0	True	False
73512570	1700031A10Rik	na	na	na	0.09375	0.1353	False	False
73512571	Ehd3	ENSMUSG00000024065	16.7634	19.0585	22.48215	13.5547	True	True
68633318	Ptrh2	ENSMUSG00000072582	7.39901	8.38588	na	na	True	False
71212404	mCG146092	na	na	na	0.0	0.0	False	False
74562528	Lrrc36	ENSMUSG00000054320	0	0	0.0495	0.1225	False	False
75860919	Lyzl1	ENSMUSG00000024233	0	0	7.22435	6.17535	False	True
392	Enc1	ENSMUSG00000041773	69.186	71.4449	na	na	True	False
391	Enc1	ENSMUSG00000041773	69.186	71.4449	na	na	True	False
397	Eomes	ENSMUSG00000032446	0.00377952	0.00890174	na	na	False	False
396	Eomes	ENSMUSG00000032446	0.00377952	0.00890174	0.1477	0.4781	False	False
394	Entpd1	ENSMUSG00000048120	4.47655	5.56118	40.8846	44.0046	True	True
73716477	1700024P04Rik	ENSMUSG00000045022	0	0	0.0005	0.04665	False	False
68151390	Cd8b1	ENSMUSG00000053044	0.0138273	0.0331264	5.084	10.1661	False	True
69202999	2700081O15Rik	ENSMUSG00000053080	7.24759	7.7578	22.57495	15.91345	True	True
70203507	2610002D18Rik	ENSMUSG00000078521	0.0842763	0.0532881	3.1622	6.48485	False	True
2308	Hunk	ENSMUSG00000053414	5.48647	4.27816	na	na	True	False
81599684	B230354K17Rik	na	na	na	na	na	False	False
73423774	Mefv	ENSMUSG00000022534	0	0	0.0	0.0	False	False
81599682	1110059P08Rik	ENSMUSG00000019868	36.1859	32.808	na	na	True	False
71211671	1520402A15Rik	ENSMUSG00000028701	4.6346	4.97459	na	na	True	False
2300	Hoxb13	ENSMUSG00000049604	0	0	na	na	False	False
71486970	Rab5c	ENSMUSG00000019173	21.8531	22.2403	1.29535	0.1663	True	True
2302	Hrasls3	ENSMUSG00000060675	13.6423	14.068	12.4619	11.8668	True	True
69444783	Cep76	ENSMUSG00000073542	2.5135	2.12767	4.8059	3.8691	True	True
2304	Hax1	ENSMUSG00000027944	2.25818	1.89829	na	na	True	False
2306	Hs3st1	ENSMUSG00000051022	18.2172	15.4087	na	na	True	False
68302251	Mall	ENSMUSG00000027377	0.118118	0.162011	na	na	True	False
69735078	Hpcal4	ENSMUSG00000046093	163.141	215.625	61.7999	58.4541	True	True
70302515	Tlr11	ENSMUSG00000051969	0	0.00443236	0.0	0.04725	False	False
70200854	Mobkl1a	ENSMUSG00000006262	22.698	19.1378	0.97335	0.42025	True	False
80341097	Clec4a2	ENSMUSG00000030148	0.410919	1.00363	0.1999	0.499	True	False
71213292	mCG3487.2	na	na	na	na	na	False	False
69237209	Edg4	ENSMUSG00000031861	0.105735	0.247519	20.5364	15.1392	True	True
75990559	Dtymk	ENSMUSG00000026281	16.3292	18.2385	6.28025	7.0144	True	True
68269502	H2afy	ENSMUSG00000015937	20.5007	21.1295	16.9443	12.9932	True	True
70296074	Hmcn1	ENSMUSG00000066842	0.703805	0.728311	5e-05	0.04335	True	False
73927613	6330419E12RikASTERISK	na	na	na	na	na	False	False
71378437	Ptprc	ENSMUSG00000026395	1.02365	1.18276	0.2406	0.34835	True	False
68269058	Spsb2	ENSMUSG00000038451	0.285886	0.289349	0.0661	0.0	True	False
68269059	Hprt1	ENSMUSG00000025630	84.7891	79.1233	62.6582	60.08595	True	True
632517	Eya2	ENSMUSG00000017897	0.798407	1.08826	0.2351	0.7856	True	False
632516	Lrrc40	ENSMUSG00000063052	20.0739	18.736	0.0	0.0	True	False
69237203	Edg3	ENSMUSG00000067586	0.935819	1.43833	1.1011	1.3842	True	True
68269055	Hsd17b4	ENSMUSG00000024507	14.8746	13.2762	6.4217	2.96985	True	True
632513	2610529C04Rik	ENSMUSG00000031232	5.66906	5.52878	na	na	True	False
632512	Ccdc23	ENSMUSG00000028643	2.47388	2.90478	0.0	0.0	True	False
73927619	6330553B08RikASTERISK	na	na	na	na	na	False	False
632510	Hip2	ENSMUSG00000029203	132.468	135.14	33.9615	45.3115	True	True
69444278	5830454E08Rik	na	na	na	65.9497	66.5083	False	True
71211513	2210015D19Rik	na	na	na	0.0	0.09415	False	False
70298567	Gm1630	na	na	na	0.0	0.0	False	False
69672515	Fmo3	ENSMUSG00000026691	0	0	0.19005	0.12165	False	False
70298561	Dnahc7	na	na	na	0.14115	0.04365	False	False
80341093	Pla2g6	ENSMUSG00000042632	2.32567	2.24628	3.3644	1.3438	True	True
79912617	Kcnq1ot1	na	na	na	na	na	False	False
69735072	Hnrpm	ENSMUSG00000059208	51.1334	50.8711	42.60945	36.7371	True	True
70724774	Gzmf	ENSMUSG00000015441	0	0	0.0	0.0	False	False
69838405	5830482F20Rik	ENSMUSG00000051735	0.412696	0.307446	0.49275	0.1262	True	False
69838406	Thex1	ENSMUSG00000031527	4.6358	4.35917	0.04505	0.0	True	False
70303600	Zfp81	ENSMUSG00000003929	7.96238	8.10092	0.01805	0.15905	True	False
70303606	Jarid1d	ENSMUSG00000056673	9.02496	9.63323	0.22995	0.0	True	False
75198196	2010007H12Rik	ENSMUSG00000029725	4.09399	4.16218	4.4835	3.74785	True	True
69838403	2310057M21Rik	ENSMUSG00000040177	8.19214	8.64149	1.58395	1.7676	True	True
74514085	Prdm6	ENSMUSG00000069378	0.367071	0.353859	0.2932	0.2227	True	False
73513480	AY487415	na	na	na	0.0897	0.4501	False	False
76081038	Tmod4	ENSMUSG00000005628	0.307816	0.229962	8.60595	8.7194	True	True
69446262	Wdr48	ENSMUSG00000032512	14.0225	14.1156	4.61065	4.56935	True	True
68844409	Ing5	ENSMUSG00000026283	2.57446	2.67799	0.26095	0.3154	True	False
69887475	Supv3l1	ENSMUSG00000020079	5.81392	5.79761	1.1753	0.78745	True	True
71991774	2310005E17Rik	na	na	na	0.3433	0.4787	False	False
68844403	A830041P22Rik	ENSMUSG00000061702	4.33606	6.16139	na	na	True	False
74720844	Olfr1449	ENSMUSG00000049498	0	0	0.10305	0.35555	False	False
68745498	Sult1c1	ENSMUSG00000023943	0	0	10.8212	18.4959	False	True
71608264	Tcf25	ENSMUSG00000001472	140.327	126.49	86.2372	81.09745	True	True
71608263	Cyhr1	ENSMUSG00000053929	13.8896	13.2443	6.3495	2.8689	True	True
78534484	Slc25a29	ENSMUSG00000021265	1.7161	1.88594	na	na	True	False
71380351	Zfp687	ENSMUSG00000019338	3.05396	3.35098	0.9661	2.30035	True	True
71212117	mCG144694	na	na	na	0.00695	0.0	False	False
70786737	LOC433740	na	na	na	1.7568	5.0584	False	True
70786731	B020004J07Rik	ENSMUSG00000035201	0.00832599	0	0.1904	0.07895	False	False
68798244	Tollip	ENSMUSG00000025139	35.9783	32.0804	18.9713	16.783	True	True
72471708	Trmu	ENSMUSG00000022386	5.68531	6.23417	0.1813	0.20235	True	False
69449002	A730080H06Rik	na	na	na	0.57535	0.39915	False	False
69449008	A730089K16Rik	na	na	na	0.03295	0.17855	False	False
68924775	Gmeb1	ENSMUSG00000028901	9.21519	9.86625	16.0721	13.452	True	True
77800945	BC021611	ENSMUSG00000015016	1.31019	1.51766	25.98135	24.40425	True	True
77800943	Klhl5	ENSMUSG00000054920	11.0172	12.9312	9.24655	10.218375	True	True
77932805	Tarbp2	ENSMUSG00000023051	2.95097	3.13115	13.5908549	12.6787456	True	True
68844749	Tigd3	ENSMUSG00000044390	0.154236	0.221409	na	na	True	False
73679122	2310046O06Rik	ENSMUSG00000032305	2.42806	2.69031	82.7142	85.9522	True	True
73927607	6330417H05RikASTERISK	na	na	na	na	na	False	False
178	Calb2	ENSMUSG00000003657	0.784902	3.16288	na	na	True	False
75198226	Golt1b	ENSMUSG00000030245	20.2736	19.7785	17.2592	15.1994	True	True
176	Calb1	ENSMUSG00000028222	4.56752	7.84658	na	na	True	False
68844743	Rnf38	ENSMUSG00000035696	31.7438	30.5227	na	na	True	False
70787420	LOC434123	na	na	na	0.74405	0.0	False	False
173	C130076O07Rik	ENSMUSG00000020598	82.5995	77.1032	na	na	True	False
70787426	LOC434128	ENSMUSG00000070802	15.702	19.0531	61.02655	67.3041	True	True
171	Rbbp6	ENSMUSG00000030779	66.5501	72.158	na	na	True	False
73927601	5830469L07RikASTERISK	na	na	na	na	na	False	False
2650	Syt11	ENSMUSG00000068923	135.326	130.34	77.2376	74.49195	True	True
71991846	Trip6	ENSMUSG00000023348	0.547558	0.699072	0.04465	0.0	True	False
68637682	Vps37b	ENSMUSG00000066278	2.41878	2.3739	74.0979	76.7738	True	True
71665000	Tspyl4	ENSMUSG00000039485	107.642	110.616	84.9066	83.4583	True	True
69981067	Tmc5	ENSMUSG00000030650	0.0472095	0.00962877	na	na	False	False
68637688	Polr3c	ENSMUSG00000028099	4.88748	5.1157	76.1029	81.3265	True	True
70300953	Psors1c2	ENSMUSG00000024409	0.0253465	0.0672459	27.20765	21.03885	False	True
68203445	Gtf2f1	ENSMUSG00000002658	18.697	22.3954	42.3946	52.6389	True	True
71920141	Tssk5	ENSMUSG00000060794	0	0	0.18555	0.39645	False	False
68203447	Uqcr	ENSMUSG00000020163	15.294	13.9165	57.2457	52.9376	True	True
69407756	4833427B12Rik	ENSMUSG00000031821	5.01789	5.2545	0.2368	0.1291	True	False
68203440	Hmx2	ENSMUSG00000050100	0	0	74.93765	70.1919	False	True
68546434	Slbp	ENSMUSG00000004642	13.3457	13.7103	na	na	True	False
71920147	1700065J11Rik	na	na	na	na	na	False	False
70565975	Timm8a2	ENSMUSG00000071229	0.0685185	0.117282	0.0	0.1772	True	False
69817264	Ppt1	ENSMUSG00000028657	65.5491	62.5522	13.77045	9.34265	True	True
74736342	LOC433023	na	na	na	0.0482	0.0765	False	False
69782939	Pde8a	ENSMUSG00000025584	4.68969	2.82608	0.10435	0.10525	True	False
68302293	Cyp1a2	ENSMUSG00000032310	0	0	7.4693	13.1064	False	True
72283551	A630007B06Rik	ENSMUSG00000035173	28.0061	27.1781	8.2549	4.17285	True	True
72283557	A830080D01Rik	ENSMUSG00000044150	8.71698	8.78181	0.0	0.0	True	False
75828174	Xlr4b	ENSMUSG00000067768	0.0841804	0.0767425	25.21785	26.5264	False	True
73653470	Olfr640	ENSMUSG00000066262	0	0	0.05915	0.0738	False	False
68269067	Psph	ENSMUSG00000029446	10.3878	10.9107	53.09995	49.4495	True	True
77454641	Scnn1g	ENSMUSG00000000216	0.0282091	0.0239546	na	na	False	False
69816685	Polr2a	ENSMUSG00000005198	14.3133	14.9196	13.366	7.73865	True	True
81790698	Epha7	ENSMUSG00000028289	31.554	24.6136	na	na	True	False
69735861	Klhl13	ENSMUSG00000036782	11.2272	14.631	1.3232	1.6232	True	True
71148229	D330017J20Rik	ENSMUSG00000039629	1.04177	0.760451	0.2418	0.2059	True	False
70429333	Orc2l	ENSMUSG00000026037	8.68625	8.06188	1.4688	1.308	True	True
68269065	Rai12	ENSMUSG00000018565	22.3905	22.7976	32.21025	25.9642	True	True
68545527	5330431N19Rik	ENSMUSG00000041035	12.1475	12.869	38.1379	40.95935	True	True
69735867	Klhl17	ENSMUSG00000078484	4.42565	5.28543	16.46605	22.12565	True	True
81790690	Gabrb2	ENSMUSG00000007653	76.9989	65.5846	53.5354	53.8799	True	True
68632020	Idh3a	ENSMUSG00000032279	54.3058	50.1011	na	na	True	False
81790692	Hcrtr2	ENSMUSG00000032360	1.57351	1.78108	0.0	0.0	True	False
68341985	Apoc3	ENSMUSG00000032081	0.114821	0.246221	24.3116	38.3241	True	True
75831782	Drd1ip	ENSMUSG00000025468	26.7989	32.5484	na	na	True	False
81790696	Crhr1	ENSMUSG00000018634	4.12472	3.15279	22.5976	13.1939	True	True
75831780	4921520G13Rik	ENSMUSG00000029607	0.507454	0.385072	5.5864	7.0999	True	True
2534	Rhbdf1	ENSMUSG00000020282	1.43912	1.3352	1.8212	1.605	True	True
71724792	4932442K08Rik	ENSMUSG00000014763	18.3764	19.3328	na	na	True	False
70301037	Ripk2	ENSMUSG00000041135	3.19476	3.0152	0.03815	0.0395	True	False
69448978	A730049N16Rik	na	na	na	1.2459	0.2319	False	True
74578329	LOC269911	na	na	na	0.10135	0.0088	False	False
75991191	Mm.373745	na	na	na	14.36525	14.11825	False	True
70238639	D19Ertd386e	ENSMUSG00000025184	9.54818	8.43448	0.26275	0.0752	True	False
70724708	Eif2c3	ENSMUSG00000028842	14.7549	13.1134	4.69725	3.5934	True	True
70205602	4833447P13Rik	na	na	na	0.4365	0.0	False	False
71724798	Ankrd22	ENSMUSG00000024774	0.778522	0.0195749	0.0453	0.0	True	False
70238633	D18Ertd653e	ENSMUSG00000024544	4.73006	4.26098	1.795	2.55405	True	True
69116751	Eif4ebp3	ENSMUSG00000090264	0.499395	0.0566467	na	na	True	False
69549628	Tspan5	ENSMUSG00000028152	46.3343	34.3799	50.80215	32.2073	True	True
71920496	Pigm	ENSMUSG00000050229	4.2646	4.03513	0.30495	0.2914	True	False
71920497	Polg2	ENSMUSG00000020718	0.993536	1.15178	0.61175	0.0	True	False
71920494	Pgm5	ENSMUSG00000041731	0.769846	0.944121	0.0602	0.07285	True	False
71213204	mCG3562.2	na	na	na	21.065	24.3809	False	True
71920492	Pcsk4	ENSMUSG00000020131	1.66542	1.82833	0.33295	0.4798	True	False
71579873	Centa2	ENSMUSG00000020709	2.19445	2.37166	0.0	0.0435	True	False
71920490	Pask	ENSMUSG00000026274	1.73675	1.92479	na	na	True	False
73617564	2810046M22Rik	ENSMUSG00000055235	0.14958	0.0536038	0.0	0.048	True	False
72076515	E030044B06Rik	na	na	na	0.40565	0.28815	False	False
71280982	Ube2n	ENSMUSG00000074781	28.9409	28.1115	26.7667	20.98855	True	True
2274	Kiss1r	ENSMUSG00000035773	0.619887	0.74771	na	na	True	False
71579879	Centd2	ENSMUSG00000032812	1.8322	1.77021	0.00705	0.0	True	False
68193034	4933424B01Rik	ENSMUSG00000040250	21.1022	20.0722	53.1371	51.5823	True	True
69816356	Pnliprp1	ENSMUSG00000042179	0	0	1.9023	0.8956	False	True
68193037	Dhx32	ENSMUSG00000030986	8.91088	10.4628	na	na	True	False
323848	Meis1	ENSMUSG00000020160	1.4018	1.30738	12.2315	9.0829	True	True
69816643	Npas3	ENSMUSG00000021010	2.98572	3.41467	0.3453	0.1481	True	False
68441520	Eef1g	ENSMUSG00000071644	16.139	17.149	24.92205	23.9052	True	True
77465042	Rps23	ENSMUSG00000049517	1.54804	1.76474	44.10975	45.15665	True	True
70201211	1700010B08Rik	ENSMUSG00000057047	0	0	na	na	False	False
68193038	Stard7	ENSMUSG00000027367	28.4868	29.2729	29.3684	46.2291	True	True
68196921	Igsf9	ENSMUSG00000037995	0.535728	0.454883	0.0717	0.0	True	False
70300804	Piwil1	ENSMUSG00000029423	0.0184833	0.0161882	7.1918	6.82095	False	True
69782897	Pdcd1	ENSMUSG00000026285	0.00723853	0.0169715	0.0	0.0	False	False
69526576	Ambn	ENSMUSG00000029288	0	0	0.0	0.0858	False	False
69526577	Amh	ENSMUSG00000035262	0.0616103	0.0182751	0.2418	0.2707	False	False
69526570	Als2cr13	ENSMUSG00000041040	17.4438	17.6314	10.43215	7.0194	True	True
71212512	Ddn	ENSMUSG00000059213	52.4798	63.0027	24.1505	23.2963	True	True
71529923	Hydin	ENSMUSG00000059854	0.0811611	0.249919	0.0	0.0	True	False
69529226	BC066107	ENSMUSG00000095325	3.13095	2.91008	31.795	29.88205	True	True
71489784	Tor3a	ENSMUSG00000060519	1.99011	2.18103	4.60985	6.86455	True	True
69608354	Cyp27b1	ENSMUSG00000006724	0.127168	0.114571	0.0	0.0	True	False
71489786	S100a17l1	ENSMUSG00000063767	0.0216496	0.0507715	0.5876	0.2438	False	False
81654135	Foxc2	ENSMUSG00000046714	0.405699	0.537369	na	na	True	False
68666989	2810422O20Rik	ENSMUSG00000041396	1.2112	1.14467	9.86365	7.9151	True	True
70239063	E430004N04Rik	ENSMUSG00000049109	0.062625	0.0622495	0.05285	0.0	False	False
68919012	AV312086	ENSMUSG00000046139	10.6939	11.165	0.1417	0.2365	True	False
73731325	G630078J19RikASTERISK	na	na	na	na	na	False	False
545098	Ttc4	ENSMUSG00000025413	12.3864	13.0444	2.2888	0.2635	True	True
70298579	Gm1645	na	na	na	17.0064	16.54205	False	True
68499452	Col13a1	ENSMUSG00000058806	0.10766	0.259685	3.05145	5.6803	True	True
68546299	Cycs	ENSMUSG00000058927	7.28986	6.41762	61.4068	56.1435	True	True
76003546	H2-T24	ENSMUSG00000053835	14.4875	14.4478	3.56105	4.81475	True	True
69549626	Pscd4	ENSMUSG00000018008	0.794134	0.890956	0.08125	0.0	True	False
75214935	Ppp2r3a	na	na	na	30.6684	29.06475	False	True
68546293	Lgals8	ENSMUSG00000057554	23.1655	24.4466	3.5579	3.8567	True	True
76135583	1700094C09Rik	ENSMUSG00000010435	0	0	1.47995	1.56475	False	True
68148683	Jmjd5	ENSMUSG00000030752	0.835141	0.789787	0.0	0.0978	True	False
69782891	Pdap1	ENSMUSG00000029623	16.5411	18.1353	42.655	39.24085	True	True
71991995	Zp3	ENSMUSG00000004948	0	0.0113514	0.1206	0.0	False	False
71325384	Ptger3	ENSMUSG00000040016	5.3018	4.43563	0.0	0.0784	True	False
1114	Wnt7b	ENSMUSG00000022382	3.22999	3.25576	4.3007	1.2349	True	True
77464894	Rhox6	ENSMUSG00000097200	0	0	2.94915	2.26605	False	True
71211785	mCG142089	na	na	na	na	na	False	False
68845436	Wipi2	ENSMUSG00000029578	9.76083	10.0321	na	na	True	False
71494653	9530080M15Rik	na	na	na	0.00395	0.12735	False	False
74578167	Luc7l2	ENSMUSG00000029823	81.2272	73.7321	53.6831	63.424	True	True
70218175	4930465K10Rik	na	na	na	0.0	0.00125	False	False
69202609	2410003P15Rik	ENSMUSG00000005882	8.41628	8.83543	32.5593	26.20465	True	True
69873606	Sf3a2	ENSMUSG00000020211	3.46206	4.06794	19.20585	11.6449	True	True
69980310	Tgfbi	ENSMUSG00000035493	0.855549	0.671083	0.12245	0.171	True	False
69202358	2310007H09Rik	ENSMUSG00000030946	3.83735	4.06363	na	na	True	False
323183	Mttp	ENSMUSG00000028158	1.04945	1.33326	na	na	True	False
80472065	Sostdc1	ENSMUSG00000036169	0.126428	0.227026	0.2696	0.1746	True	False
74357598	Stac2	ENSMUSG00000017400	7.04111	8.21144	54.93045	55.1007	True	True
70278039	Il1f9	ENSMUSG00000044103	0.00858684	0	0.0	0.0	False	False
69202352	2310007D09Rik	ENSMUSG00000027654	0.399559	0.250118	na	na	True	False
74580727	4931440B09Rik	ENSMUSG00000024114	0.0289597	0.0167337	0.0	0.0	False	False
477	Slc6a1	ENSMUSG00000030310	64.4286	71.8797	na	na	True	False
73818829	Nalp2	ENSMUSG00000035177	0	0	0.0	0.6984	False	False
68797792	2810485I05Rik	ENSMUSG00000037808	8.40593	8.15192	1.1755	0.2568	True	True
70528055	4930519N16Rik	ENSMUSG00000021396	0.0173176	0.040405	0.0	0.022	False	False
69257540	Gpr34	ENSMUSG00000040229	2.65119	2.93619	0.4803	0.4913	True	False
73818824	AI452102	na	na	na	0.1816	0.0692	False	False
73818827	Oog4	ENSMUSG00000097153	0	0	10.3761	4.7345	False	True
73818826	Kbtbd1	ENSMUSG00000044938	0.0724146	0.0561967	0.0	0.1322	False	False
71809313	2810407A14Rik	na	na	na	0.0	0.0	False	False
69257546	Gpr37l1	ENSMUSG00000026424	25.4419	21.986	27.9722	32.2438	True	True
68797798	Arid3b	ENSMUSG00000004661	2.52641	1.5867	na	na	True	False
70795817	Bud31	ENSMUSG00000038722	30.1441	29.8366	5.19625	4.0271	True	True
70300887	Ppm1l	ENSMUSG00000027784	45.8089	37.9721	47.1256	39.4141	True	True
70795811	TC1462037	na	na	na	2.57385	1.8603	False	True
71763753	Dnaja2	ENSMUSG00000031701	66.4499	61.9515	41.0809	34.0564	True	True
70919280	Zbtb22	ENSMUSG00000051390	2.53306	2.22993	0.46525	0.0	True	False
72081771	Raver1	ENSMUSG00000010205	7.74845	7.87878	0.09565	0.0353	True	False
72081777	1700001K19Rik	ENSMUSG00000056508	0.130742	0.165199	0.08005	0.08685	True	False
71763759	Edn1	ENSMUSG00000021367	0.635886	0.635886	0.00685	0.0888	True	False
69117400	Calb1	ENSMUSG00000028222	4.56752	7.84658	na	na	True	False
69117401	Dkk3	ENSMUSG00000030772	126.691	92.6212	na	na	True	False
69117402	Nrtn	ENSMUSG00000039481	0.288025	0.0485561	0.3088	0.2523	True	False
1769	Lphn2	ENSMUSG00000028184	15.6203	11.5711	48.0938	53.4397	True	True
68667587	Hdc	ENSMUSG00000027360	0.208608	0.127732	na	na	True	False
69117158	Pou1f1	ENSMUSG00000004842	0.0638916	0.0129949	na	na	False	False
71488780	Smyd1	ENSMUSG00000055027	1.10969	1.23128	0.1242	0.0996	True	False
1763	Kcnk13	ENSMUSG00000045404	0.658906	0.393364	19.2706	27.9331	True	True
68637461	Wdr53	ENSMUSG00000022787	6.14786	5.97193	2.2255	5.9572	True	True
70296014	Gm196	na	na	na	9.633	9.0971	False	True
68410375	Hsd17b13	ENSMUSG00000034528	0	0.0085543	na	na	False	False
1767	Ldlr	ENSMUSG00000032193	2.29432	1.96604	0.0	0.1787	True	False
1765	Kcnv2	ENSMUSG00000047298	0.0153024	0.0198203	15.3083	22.2255	False	True
70474815	Cep55	ENSMUSG00000024989	0.0567431	0.0360945	15.0914	21.1368	False	True
73811735	D130012J16RikASTERISK	na	na	na	na	na	False	False
79394328	Ocln	ENSMUSG00000021638	1.6214	1.65058	76.1757	80.6388	True	True
73653308	Olfr1404	ENSMUSG00000049456	0	0	0.0	0.00205	False	False
69015667	Wwox	ENSMUSG00000004637	22.4303	23.8329	14.9107	12.1058	True	True
70528587	Ddx3y	ENSMUSG00000069045	15.9594	15.145	0.0312	0.04045	True	False
71161153	Mm.352421	na	na	na	24.46505	28.48655	False	True
71213743	LOC433079	na	na	na	0.37475	0.2469	False	False
70528270	AU022870	ENSMUSG00000029617	9.73772	9.34567	8.8041	5.7358	True	True
73635451	Mm.354428	na	na	na	0.08025	0.0	False	False
69170312	Sgk2	ENSMUSG00000017868	0.537506	0.27171	4.8748	4.1256	True	True
70565300	Tbc1d5	ENSMUSG00000023923	9.062	8.24283	0.383	0.17375	True	False
71381007	Abi3bp	ENSMUSG00000035258	0.290037	0.935695	na	na	True	False
69528064	Bahd1	ENSMUSG00000040007	3.04528	3.4809	0.62925	0.24725	True	False
70725567	LOC434069	na	na	na	0.1903	0.1361	False	False
1544	Tm7sf3	ENSMUSG00000040234	7.10011	7.05931	na	na	True	False
691	Ndrg3	ENSMUSG00000027634	128.218	129.207	na	na	True	False
1542	Tcf2	ENSMUSG00000020679	0.118138	0.137093	na	na	True	False
694	Negr1	ENSMUSG00000040037	42.3328	49.0329	na	na	True	False
695	Negr1	ENSMUSG00000040037	42.3328	49.0329	na	na	True	False
638705	Ncstn	ENSMUSG00000003458	20.5844	21.889	2.058	3.8043	True	True
699	Neurod6	ENSMUSG00000037984	72.9099	67.0989	na	na	True	False
70813383	Pole3	ENSMUSG00000028394	7.41231	6.85906	0.29485	0.20635	True	False
1548	Ube2g2	ENSMUSG00000009293	9.17069	9.78599	0.078	0.053	True	False
69873505	Sele	ENSMUSG00000026582	0.0125589	0.00572216	0.0787	0.2709	False	False
199143	Pappa2	ENSMUSG00000073530	0.34414	0.737573	0.0867	0.0925	True	False
1118	Wrb	ENSMUSG00000023147	25.4439	27.5711	na	na	True	False
71211477	mCG14772.2	na	na	na	24.52295	19.4382	False	True
70946526	Mfn2	ENSMUSG00000029020	21.6689	21.0797	41.90105	37.61585	True	True
70946525	Mfhas1	ENSMUSG00000070056	8.06189	8.17399	46.5689	43.9439	True	True
70231743	BC043934	na	na	na	0.1354	0.1649	False	False
69289805	Rere	ENSMUSG00000039852	20.9585	23.2647	33.95195	31.526	True	True
75496146	Plp1	ENSMUSG00000031425	316.901	182.385	na	na	True	False
70231749	BC049806	ENSMUSG00000038174	50.5241	48.7177	0.18855	0.03615	True	False
69837872	Notch2	ENSMUSG00000027878	3.25223	3.50229	0.05965	0.3627	True	False
79394322	Lhcgr	ENSMUSG00000024107	0.12651	0.249003	na	na	True	False
69837874	Impa1	ENSMUSG00000027531	11.4727	10.7262	11.265	9.9716	True	True
68745275	Apaf1	ENSMUSG00000019979	7.73591	13.2986	20.0488	43.7036	True	True
71161393	Mdc1	ENSMUSG00000061607	3.72154	2.79299	0.9049	0.31715	True	False
68919904	Xpo6	ENSMUSG00000000131	36.7318	37.74	19.6308	13.8	True	True
1058	Th	ENSMUSG00000000214	0.159173	0.193879	na	na	True	False
69514440	A930021C24Rik	ENSMUSG00000042655	2.26834	2.27281	9.1045	10.1932	True	True
68341298	Apoa4	ENSMUSG00000032080	0	0	6.4332	6.8241	False	True
69353768	1700067K01Rik	ENSMUSG00000046408	0.8577	1.27775	0.16025	0.25825	True	False
71212524	mCG147159	na	na	na	0.0	0.0	False	False
70300732	Pdzd8	ENSMUSG00000074746	20.4526	19.5752	20.57765	18.44085	True	True
70919884	Mrpl3	ENSMUSG00000032563	24.6383	23.1626	0.0	0.0	True	False
71152419	Mm.210702	na	na	na	0.0	0.0582	False	False
68341292	BC013481	ENSMUSG00000070780	0.241639	0.279225	0.0	0.4075	True	False
70300780	Phc3	ENSMUSG00000037652	25.1528	24.3248	41.9535	47.5303	True	True
69548927	Chst5	ENSMUSG00000031952	0.0619158	0.0737201	0.12375	0.1868	False	False
71891784	4930473A06Rik	ENSMUSG00000052407	1.78845	1.71513	0.0482	0.1615	True	False
532601	Wdr12	ENSMUSG00000026019	7.7892	7.59805	30.37735	27.4305	True	True
75774629	Slc31a2	ENSMUSG00000066152	6.15319	5.78971	62.03385	65.664	True	True
70565476	E030007A22	na	na	na	4.2948	4.5821	False	True
74265153	4930528G09RikASTERISK	na	na	na	na	na	False	False
71493867	9330132A10Rik	na	na	na	0.001	0.3253	False	False
69134523	Bag1	ENSMUSG00000028416	55.4813	59.9944	na	na	True	False
70784624	Magea4	ENSMUSG00000033343	0	0	0.1506	0.46245	False	False
74265159	4930533L02RikASTERISK	na	na	na	na	na	False	False
74578341	Pou2f3	ENSMUSG00000032015	0.0333506	0.0748663	0.18395	0.17935	False	False
71891989	LOC433180	ENSMUSG00000055095	0	0	0.0	0.0	False	False
71487031	B4galt4	ENSMUSG00000022793	9.89831	11.2392	0.0	0.0	True	False
70218283	Camsap1l1	ENSMUSG00000041570	45.1462	44.4814	41.1467	42.3775	True	True
73949499	A130034H22RikASTERISK	na	na	na	na	na	False	False
70473999	Smoc1	ENSMUSG00000021136	1.52719	2.17126	0.0	0.0837	True	False
70194552	Ugcg	ENSMUSG00000028381	58.3204	52.2056	2.55535	0.87815	True	True
392920	Cct6a	ENSMUSG00000029447	37.7	37.2457	na	na	True	False
77464984	Itgb2	ENSMUSG00000000290	0.937486	0.908536	2.49585	2.6569	True	True
68161471	Prr11	ENSMUSG00000020493	0.196446	0.246937	na	na	True	False
70793911	Cox7c	ENSMUSG00000017778	12.5296	14.197	0.0	0.0	True	False
71393466	Kcnh2	ENSMUSG00000038319	2.9402	2.89072	0.0	0.1079	True	False
71764162	Ndnl2	ENSMUSG00000070520	5.15614	5.35712	4.4934	3.31135	True	True
671253	Zgpat	ENSMUSG00000027582	6.41255	7.24583	4.2722	4.4364	True	True
69734440	Gm632	ENSMUSG00000000823	11.0595	12.7976	13.99935	15.12425	True	True
74720675	Olfr1271	ENSMUSG00000075062	0	0.0173032	0.07895	0.0	False	False
74581140	1300002K09Rik	ENSMUSG00000028327	0.00619035	0.00547075	0.0	0.1265	False	False
67979053	Cxcl9	ENSMUSG00000029417	0.0247798	0.0156817	0.2459	0.0661	False	False
671252	Ier3ip1	ENSMUSG00000090000	20.13	19.7097	0.0	0.0	True	False
71377987	1700021A07Rik	na	na	na	1.92965	3.69525	False	True
68341477	Creb3l3	ENSMUSG00000035041	0.0870756	0.0973828	na	na	False	False
69014907	2310016F22Rik	ENSMUSG00000068246	0.0376979	0.0102885	0.29155	0.513	False	False
71152306	Mm.200422	na	na	na	0.06075	0.2372	False	False
70919238	Gstm6	ENSMUSG00000068762	1.27028	1.98024	na	na	True	False
71892388	Defb41	ENSMUSG00000067773	0	0	0.0	0.0	False	False
68745072	Capn9	ENSMUSG00000031981	0.0137849	0.0399103	0.0	0.5768	False	False
69014901	1200009F10Rik	ENSMUSG00000019975	2.77647	2.66422	2.1703	2.22695	True	True
70200996	1600014C23Rik	ENSMUSG00000094690	0	0	0.0	0.0	False	False
71209946	Mm.359909	na	na	na	0.0	0.0408	False	False
71808594	Gsg1l	ENSMUSG00000046182	21.33	32.5074	14.0807	20.444	True	True
74076072	D830014K04RikASTERISK	na	na	na	na	na	False	False
69012765	Sv2a	ENSMUSG00000038486	82.7071	73.9356	76.97295	78.74555	True	True
71210442	Dmxl1	ENSMUSG00000037416	22.277	19.5226	0.0023	0.0836	True	False
70305204	AK162044	ENSMUSG00000022269	3.95076	3.2835	0.4572	0.02135	True	False
68545483	Polr3g	ENSMUSG00000035834	3.15296	3.10886	0.0	0.1544	True	False
71764156	Mras	ENSMUSG00000032470	80.385	78.5084	42.91552275	38.2403988	True	True
71579855	Cdc42bpb	ENSMUSG00000021279	13.7098	13.954	1.9511	0.71535	True	True
77454591	Tcf4	ENSMUSG00000053477	191.768	187.388	84.9715	80.1386	True	True
68301276	Arg1	ENSMUSG00000019987	0.207168	0.344661	na	na	True	False
71919212	1600029I14Rik	ENSMUSG00000046242	0.17886	0.234133	0.2639	0.0892	True	False
74056156	Unc93a	ENSMUSG00000067049	0.0132001	0.00633937	na	na	False	False
68341943	Wdr74	ENSMUSG00000042729	9.67063	9.45514	14.8545	12.2972	True	True
69736040	Large	ENSMUSG00000004383	37.2407	39.3369	28.99135	29.4159	True	True
68301270	Ap3s1	ENSMUSG00000024480	16.9243	15.0871	14.4255	24.2948	True	True
69783220	Pira1	na	na	na	0.37855	0.2187	False	False
71213677	mCG52066.3	na	na	na	0.2788	0.3615	False	False
70429465	Ttc1	ENSMUSG00000041278	39.4013	37.33	45.4951	38.4011	True	True
70784952	Pcdhgc3	na	na	na	2.8068	1.0804	False	True
70566011	LOC227109	na	na	na	0.7889	0.0126	False	False
73513564	BC039966	na	na	na	0.11305	0.0	False	False
71627823	Clec14a	ENSMUSG00000045930	0.482654	0.566288	0.0	0.0582	True	False
71627821	Arl6ip6	ENSMUSG00000026960	4.23149	4.28144	0.4117	0.0	True	False
71627820	Smoc2	ENSMUSG00000023886	0.180294	0.175148	na	na	True	False
70785260	V1rc5	ENSMUSG00000064259	0	0	0.1247	0.1389	False	False
73584867	LOC546392	na	na	na	0.0	0.16	False	False
77932799	Fzd4	ENSMUSG00000049791	2.77967	2.63374	2.79615	3.59455	True	True
69530708	C030007I09Rik	na	na	na	na	na	False	False
69262253	Pnkd	ENSMUSG00000026179	48.8987	49.0829	38.1947	36.196	True	True
70795533	Ube1l	ENSMUSG00000032596	1.28123	0.896751	1.3515	0.77355	True	True
75826639	Alad	ENSMUSG00000028393	2.53158	2.68581	20.4516	22.64615	True	True
75826638	Ormdl1	ENSMUSG00000026097	1.80148	1.62911	4.4721	4.0749	True	True
70430830	Asz1	ENSMUSG00000010796	0.116234	0.00996243	0.08345	0.0	True	False
71764721	Clec4d	ENSMUSG00000030144	0	0	0.16505	0.09525	False	False
583857	Crsp8	ENSMUSG00000026799	12.9542	13.7946	0.481	0.9345	True	False
69980280	Tesp2	ENSMUSG00000037529	0	0	0.37625	0.0514	False	False
69980286	Tex11	ENSMUSG00000009670	0.0242141	0.0493354	0.0	0.4029	False	False
69262256	Dlg7	ENSMUSG00000037544	0.122413	0.12416	0.1711	0.1676	True	False
68563031	Clca3	ENSMUSG00000028255	0	0	na	na	False	False
583856	Rnpc3	ENSMUSG00000027981	12.6892	14.1651	na	na	True	False
74562588	Whsc1l1	ENSMUSG00000054823	41.1485	40.8715	15.7735	10.1815	True	True
70218822	Apobec4	ENSMUSG00000055547	0.563273	0.49341	0.0845	0.0445	True	False
69262257	Rhot1	ENSMUSG00000017686	34.0503	30.526	16.24655	10.0959	True	True
70295733	Gm255	na	na	na	0.0	0.0	False	False
70445353	Zfp41	ENSMUSG00000047003	2.16984	3.25092	0.9157	1.02685	True	True
68269267	Pdzrn3	ENSMUSG00000035357	11.757	7.81297	3.5798	0.1962	True	True
68269266	Aldh3a2	ENSMUSG00000010025	14.5998	14.2208	11.1421	11.0298	True	True
74000552	B530003A21RikASTERISK	na	na	na	na	na	False	False
71211296	LOC385660	na	na	na	0.06865	0.04075	False	False
69735054	Hk1	ENSMUSG00000037012	27.2789	28.3194	62.29565	62.22345	True	True
71569196	A630038D02	ENSMUSG00000052730	0.14661	0.155467	6.19545	4.89135	True	True
69013059	Shprh	ENSMUSG00000090112	18.6657	18.7241	20.1132	18.1456	True	True
69236921	Cacna2d2	ENSMUSG00000010066	6.75019	8.39459	16.8924	15.7009	True	True
74000558	B530004C07RikASTERISK	na	na	na	na	na	False	False
69236927	Cacna2d3	ENSMUSG00000021991	43.5617	29.8071	52.9997	37.733	True	True
69608435	D10Wsu102e	ENSMUSG00000020255	11.6406	11.345	0.4692	0.12755	True	False
71991696	Syt8	ENSMUSG00000031098	0	0	0.0	0.07905	False	False
73606522	Myf5	ENSMUSG00000000435	0.00814153	0	0.04615	0.00085	False	False
71991690	2600005O03Rik	ENSMUSG00000022422	0.109639	0.0894813	0.0	0.3414	True	False
74513872	C630002N23Rik	na	na	na	48.3231	35.5009	False	True
68499135	Gcat	ENSMUSG00000006378	0.556649	0.425527	1.21575	1.3231	True	True
71148172	Isgf3g	ENSMUSG00000002325	3.69907	3.97017	na	na	True	False
72471722	A630091E08Rik	na	na	na	0.483	0.0	False	False
72471723	Hoxc8	ENSMUSG00000001657	0	0	0.1939	0.0	False	False
72471720	4933424A10Rik	ENSMUSG00000067878	0.0815044	0.100281	0.1197	0.0	True	False
74513878	Tead3	ENSMUSG00000002249	0.197105	0.257631	0.2164	0.2456	True	False
73906491	4930540G01RikASTERISK	na	na	na	na	na	False	False
258	Chrd	ENSMUSG00000006958	3.47081	4.1814	na	na	True	False
76003553	Lama4	ENSMUSG00000019846	4.00652	3.63536	7.9606	12.5654	True	True
68523213	Timd4	ENSMUSG00000055546	0.016268	0.0171751	4.9611	3.9787	False	True
69445391	6530409C15Rik	ENSMUSG00000043340	4.3755	3.82382	0.08	0.2247	True	False
73906497	4930541J03RikASTERISK	na	na	na	na	na	False	False
253	Chat	ENSMUSG00000021919	0.0114269	0.0154458	na	na	False	False
70787603	LOC434220	na	na	na	2.76025	2.1948	False	True
251	Cds2	ENSMUSG00000058793	49.3478	51.3377	14.311	13.54685	True	True
256	Chd2	ENSMUSG00000078671	17.9238	16.6956	24.9766	28.1192	True	True
68523219	Pcbd2	ENSMUSG00000021496	7.85224	9.88475	0.2555	0.2254	True	False
75234121	Spink3	ENSMUSG00000024503	0	0	0.5314	0.3436	False	False
71232750	Gpiap1	ENSMUSG00000027184	261.748	271.79	14.4317	10.7399	True	True
386240	Tlcd1	ENSMUSG00000019437	9.35531	7.94968	0.5706	0.49035	True	False
75990492	D630003M21Rik	ENSMUSG00000037813	0.157028	0.154174	5.3812	3.8157	True	True
68162242	Cwf19l1	ENSMUSG00000025200	3.36619	3.51021	0.2828	1.4444	True	True
69202687	Wdr75	ENSMUSG00000025995	13.1582	12.6049	16.2305	10.0797	True	True
69059805	Pcsk7	ENSMUSG00000035382	2.86904	2.77312	30.40925	34.2705	True	True
69170330	Ngef	ENSMUSG00000026259	17.6104	20.5158	76.6558	93.006	True	True
69261927	Suz12	ENSMUSG00000017548	12.6542	12.2596	9.25615	5.6109	True	True
393252	Tsnax	ENSMUSG00000056820	35.7493	36.522	61.4992	64.8941	True	True
69261925	Setx	ENSMUSG00000043535	17.3633	16.6626	7.6623	5.9861	True	True
69261924	Pfkfb4	ENSMUSG00000025648	1.19177	1.14153	3.48435	5.5708	True	True
75214944	Vsig2	ENSMUSG00000001943	1.43976	1.09444	1.08275	0.96215	True	True
69261922	Rcor2	ENSMUSG00000024968	2.96825	2.62197	9.55945	7.21005	True	True
71022304	LOC434415	na	na	na	0.2365	0.237	False	False
79354766	Fkbp1b	ENSMUSG00000020635	13.21	12.6689	na	na	True	False
71495161	Gramd1b	ENSMUSG00000040111	62.1715	58.0419	7.9652	9.9679	True	True
75198214	Pygm	ENSMUSG00000032648	10.5014	8.31563	2.08225	2.51805	True	True
69015230	Tbn	ENSMUSG00000023980	1.25992	1.50746	11.492	14.1184	True	True
70231128	Zc3hav1l	ENSMUSG00000047749	2.05794	2.11546	1.22115	0.7342	True	True
70795886	Elac2	ENSMUSG00000020549	4.08654	3.98001	11.1703	6.3125	True	True
71608455	Phyhip	ENSMUSG00000003469	48.6151	50.2227	70.8611	69.0785	True	True
386004	Selk	na	na	na	na	na	False	False
71020812	Mrs2l	ENSMUSG00000021339	7.73463	7.71111	18.59885	10.6324	True	True
69448014	A330035P11Rik	na	na	na	15.6943	19.3819	False	True
80472068	Srpx	ENSMUSG00000090084	0.105857	0.118556	0.6824	0.43005	True	False
71789801	Mbd5	ENSMUSG00000036792	53.0471	54.0283	19.6434	16.52035	True	True
70565897	LOC208429	na	na	na	3.7321	2.4624	False	True
75198106	Polr2k	ENSMUSG00000045996	0.845745	0.986353	4.6582	4.169	True	True
70787083	AY616753	ENSMUSG00000068082	0	0	0.06535	0.0005	False	False
69887487	Svp2	ENSMUSG00000016998	0	0	0.3998	0.13635	False	False
71232779	Gsto1	ENSMUSG00000025068	12.2328	11.9826	5.6128	1.6766	True	True
68269550	Ppap2c	ENSMUSG00000052151	0.491273	0.354093	0.0076	0.0	True	False
70610413	Map3k7ip3	ENSMUSG00000035476	6.8838	5.76967	0.1955	0.0079	True	False
70920129	LOC434366	na	na	na	88.2617	92.8271	False	True
69059817	Ctbp1	ENSMUSG00000037373	11.2625	10.8558	48.9815	38.2827	True	True
70611132	LOC432625	na	na	na	2.4603	0.0068	False	True
69838608	Tubb2a	ENSMUSG00000058672	94.7485	110.931	94.73565	104.2417	True	True
70920123	LOC434359	na	na	na	0.1614	0.00685	False	False
70474779	Nasp	ENSMUSG00000028693	9.81652	9.07982	0.20845	0.1173	True	False
70723104	Dgkd	ENSMUSG00000070738	9.99649	10.4378	18.8557	17.9075	True	True
69289243	Jarid1b	ENSMUSG00000042207	13.7151	13.1328	11.72395	10.3666	True	True
74514375	Gm1006	ENSMUSG00000074665	0.0360568	0	0.39845	0.33545	False	False
70228101	9330175E14Rik	na	na	na	14.75735	14.5684	False	True
71325258	Mitf	ENSMUSG00000035158	2	1.78218	0.1365	0.0821	True	False
70523726	BC057371	ENSMUSG00000048899	3.1653	3.09381	1.51555	0.9211	True	True
71210654	Otop3	ENSMUSG00000018862	0	0.00600819	0.0	0.0	False	False
2518	Ran	ENSMUSG00000029430	28.9456	28.912	68.5796	60.4891	True	True
2514	Pwp2h	ENSMUSG00000032834	1.95511	2.29013	na	na	True	False
70431307	Ednrb	ENSMUSG00000022122	16.6086	15.5596	0.8767	0.1507	True	False
75492683	Calb1	ENSMUSG00000028222	4.56752	7.84658	na	na	True	False
199145	Tmem32	ENSMUSG00000061273	9.59113	8.61768	na	na	True	False
70523728	1110032E23Rik	ENSMUSG00000027955	0.842809	0.91447	0.1237	0.10395	True	False
70523729	Atg4c	ENSMUSG00000028550	16.5257	13.6584	24.91235	16.91365	True	True
2512	Pvrl4	ENSMUSG00000006411	0.438912	0.290464	na	na	True	False
199141	Lzic	ENSMUSG00000028990	4.32588	4.35961	1.7904	0.0	True	True
68798543	Phf2	ENSMUSG00000038025	7.52059	8.1802	3.97245	4.78565	True	True
69782210	Nf1	ENSMUSG00000020716	48.6268	47.9782	36.0004	31.76905	True	True
70812889	Rtn3	ENSMUSG00000024758	505.039	473.533	106.02285	88.6602	True	True
73808198	9130022E12RikASTERISK	na	na	na	na	na	False	False
70611335	Gprin2	ENSMUSG00000071531	0.00886398	0.0497543	0.8319	0.3049	False	False
68798549	Nup153	ENSMUSG00000021374	22.0893	21.9673	9.0049	7.5528	True	True
70596095	LOC381597	na	na	na	1.5206	0.3283	False	True
70611449	LOC432979	na	na	na	na	na	False	False
69873313	Rragd	ENSMUSG00000028278	10.3036	8.97098	0.2327	0.1711	True	False
69407923	4930417M19Rik	ENSMUSG00000028457	0.155741	0.142393	na	na	True	False
69407254	2810401C16Rik	ENSMUSG00000022763	12.3176	11.6482	17.21405	11.88325	True	True
69835568	2010001M09Rik	ENSMUSG00000024353	0.0227313	0.0574149	na	na	False	False
68631917	H2-M3	ENSMUSG00000016206	0.711965	0.667075	na	na	True	False
1097	Vdr	ENSMUSG00000022479	0.0122199	0.134964	na	na	True	False
68301808	2010002N04Rik	ENSMUSG00000038059	1.34705	1.17843	4.2995	3.7016	True	True
79354786	Pcdhga1	na	na	na	12.5189185	12.27257845	False	True
532632	Napa	ENSMUSG00000006024	27.2461	25.4699	na	na	True	False
293916	Cct2	ENSMUSG00000034024	50.3604	52.0476	54.7822	47.7629	True	True
68667910	Tnpo1	ENSMUSG00000009470	8.85652	8.13658	na	na	True	False
69835562	Ppp2r1b	ENSMUSG00000032058	5.94832	5.20708	1.0502	0.0003	True	True
69835563	2700007P21Rik	ENSMUSG00000027122	24.2368	23.902	0.7508	0.5334	True	False
69835564	Zfp395	ENSMUSG00000034522	1.65786	2.19266	na	na	True	False
69835565	Clic4	ENSMUSG00000037242	18.9655	12.8277	na	na	True	False
68301802	Cd86	ENSMUSG00000022901	0.541263	0.840223	na	na	True	False
68667916	Bcat1	ENSMUSG00000030268	16.0661	12.0518	na	na	True	False
532637	Clk4	ENSMUSG00000020385	87.5818	86.0132	14.9912	15.42715	True	True
68498621	4632415K11Rik	ENSMUSG00000034105	0.792269	0.799607	0.916	0.24245	True	False
74514351	LOC434871	na	na	na	0.86485	0.5279	False	False
70919746	Ubap2l	ENSMUSG00000042520	36.9365	38.7031	16.09785	15.64765	True	True
70724906	Krt81	ENSMUSG00000067615	0	0	0.0	0.0281	False	False
74635180	Ppapdc1	ENSMUSG00000031570	19.2882	22.3517	0.282	0.4083	True	False
69782766	Pebp1	ENSMUSG00000032959	45.5707	44.6213	42.27445	36.79885	True	True
75694865	Ddt	ENSMUSG00000001666	13.1788	11.3721	8.6435	8.9775	True	True
67787358	Brd3	ENSMUSG00000026918	10.3795	12.5311	na	na	True	False
69526749	Apex1	ENSMUSG00000035960	14.8873	16.1911	4.21475	2.0691	True	True
70724900	Krt27	ENSMUSG00000017588	0.0388037	0.0446049	0.06865	0.00025	False	False
67787355	Mfsd1	ENSMUSG00000027775	10.4163	9.75191	na	na	True	False
68203456	Tnnt3	ENSMUSG00000061723	0.0827344	0.111756	60.11805	53.7542	True	True
67787357	Zfp364	ENSMUSG00000028098	16.1116	12.9359	na	na	True	False
67787356	Phospho2	ENSMUSG00000027088	9.87576	8.83913	na	na	True	False
69526743	Speg	ENSMUSG00000026207	22.2473	23.5752	7.7108	5.1048	True	True
67787350	Mycbpap	ENSMUSG00000039110	0.40229	0.403479	na	na	True	False
67787353	Camkk2	ENSMUSG00000029471	10.4099	8.71699	na	na	True	False
67787352	Atp6v1d	ENSMUSG00000021114	155.618	142.036	na	na	True	False
71789771	Gnb3	ENSMUSG00000023439	0.0294095	0.0116356	2.0894	0.53485	False	True
71213831	MGC79224	ENSMUSG00000035311	37.7644	39.1511	9.38525	7.76355	True	True
71213837	LOC432615	na	na	na	0.0446	0.127	False	False
69353299	1600002H07Rik	ENSMUSG00000024118	1.70698	1.99652	na	na	True	False
69885612	Snx13	ENSMUSG00000020590	36.9547	31.9842	28.94855	26.14705	True	True
69447894	A030007L17Rik	na	na	na	0.3734	0.1779	False	False
69353293	1520402A15Rik	ENSMUSG00000028701	4.6346	4.97459	na	na	True	False
70546024	Kbtbd3	ENSMUSG00000025893	3.89208	3.88077	0.36055	0.0341	True	False
1099	Slc32a1	ENSMUSG00000037771	7.41835	7.49503	na	na	True	False
70194964	Wbscr22	ENSMUSG00000005378	10.6722	10.1346	21.4548	20.56995	True	True
68191534	Mrpl38	ENSMUSG00000020775	5.59759	6.61945	0.91265	0.3471	True	False
69117098	LOC241041	na	na	na	0.5169	0.1426	False	False
294052	Rnf10	ENSMUSG00000041740	16.9948	16.0161	63.00335	57.873	True	True
513244	Tom1l1	ENSMUSG00000020541	9.16622	9.20509	0.0	0.0	True	False
68797870	Oc90	ENSMUSG00000015001	0.321367	0.278501	0.0	0.0006	True	False
68632166	Rbck1	ENSMUSG00000027466	12.2683	14.303	74.7993	75.7857	True	True
69117092	Rai2	ENSMUSG00000043518	1.94688	1.72536	13.4888	2.4422	True	True
71808860	2810039F03Rik	ENSMUSG00000037259	86.6949	82.0483	86.0843	93.37065	True	True
71808861	Tmem61	na	na	na	0.00625	0.15065	False	False
75496148	Plp1	ENSMUSG00000031425	316.901	182.385	na	na	True	False
75750466	Dirc2	ENSMUSG00000022848	12.8358	11.9348	44.21705	43.3653	True	True
68203459	Ube4a	ENSMUSG00000059890	19.2348	18.5969	24.73555	9.37705	True	True
74635144	Tmem160	ENSMUSG00000019158	2.48496	1.88757	0.05795	0.0	True	False
70946135	Rpl14	ENSMUSG00000025794	16.249	17.6771	73.0542	73.63625	True	True
70300330	Mgat5	ENSMUSG00000036155	10.4636	11.8692	3.91905	6.0923	True	True
69028479	Ctsd	ENSMUSG00000007891	73.7927	73.2486	81.2587	77.90035	True	True
71764219	Snupn	ENSMUSG00000055334	6.42785	6.31521	0.0	0.002	True	False
68545953	2610528E23Rik	ENSMUSG00000022748	4.90567	4.24554	14.3388	12.2831	True	True
75496227	Dkk3	ENSMUSG00000030772	126.691	92.6212	na	na	True	False
75692969	Zswim6	ENSMUSG00000032846	8.03754	7.26877	6.795	6.1307	True	True
80342273	Kiss1	ENSMUSG00000091251	0	0	1.3478	1.2373	False	True
69626717	Ddx10	ENSMUSG00000053289	10.8048	10.4681	0.23265	0.1254	True	False
70918904	TC1556926	na	na	na	2.0431	0.5868	False	True
71495849	AW822216	ENSMUSG00000026211	2.8831	3.32835	0.0	0.0	True	False
73496905	Adora1	ENSMUSG00000042429	37.9276	40.1004	11.56125	8.97085	True	True
70919507	Ccne2	ENSMUSG00000028212	3.60059	3.32577	0.03395	0.0	True	False
69735544	Irs4	ENSMUSG00000054667	0.0178627	0.0884501	0.06485	0.03485	False	False
70523846	Tspan11	ENSMUSG00000030351	0.249674	0.274426	3.79205	0.709	True	True
69549266	Prodh2	ENSMUSG00000036892	0	0	0.0	0.0775	False	False
74357875	1700049J03RikASTERISK	na	na	na	na	na	False	False
2698	Trps1	ENSMUSG00000038679	24.3361	22.9842	na	na	True	False
70946196	5730507A09Rik	ENSMUSG00000030518	27.2227	35.5062	22.0512	20.66115	True	True
70946197	5730528L13Rik	ENSMUSG00000039693	5.6875	4.7915	0.0	0.0	True	False
71610853	Ttll1	ENSMUSG00000022442	26.0021	29.2216	48.7106	54.58165	True	True
69134316	Dqx1	ENSMUSG00000009145	0.0438697	0.0580481	6.2535	6.9067	False	True
70946198	6620401K05Rik	ENSMUSG00000025646	5.09296	5.63505	7.2017	3.57575	True	True
70946199	9030625A04Rik	ENSMUSG00000044350	3.63571	3.97358	0.46275	0.16475	True	False
69262315	Skil	ENSMUSG00000027660	29.182	28.4111	60.6582	53.41765	True	True
69262317	BC048355	ENSMUSG00000040658	1.5579	1.63003	0.0001	0.4226	True	False
69134310	Pcf11	ENSMUSG00000041328	25.0577	25.4987	14.30665	17.06335	True	True
71021023	C430049B03Rik	na	na	na	0.0	0.0	False	False
74724049	Olfr362	ENSMUSG00000075377	0	0	0.0	0.05415	False	False
71021021	C430014M02Rik	ENSMUSG00000066151	12.3403	12.169	59.8097	57.8571	True	True
71021020	Gatad2b	ENSMUSG00000042390	55.8111	59.5548	13.73285	9.5109	True	True
69672725	Slc6a11	ENSMUSG00000030307	22.0596	20.7545	13.9003	13.2725	True	True
71021026	C530043K16Rik	na	na	na	0.0	0.0	False	False
71021025	C530043A13Rik	na	na	na	0.0	0.0	False	False
73606485	Egr3	ENSMUSG00000033730	6.88121	5.63879	31.6072	16.21305	True	True
71587757	Golgb1	ENSMUSG00000078096	0	0	0.0	0.0	False	False
71587757	Golgb1	ENSMUSG00000034243	31.7464	33.1019	0.0	0.0	True	False
71021029	Tmem132d	ENSMUSG00000034310	2.61702	2.35577	17.631	6.36505	True	True
71021028	Zfp719	ENSMUSG00000030469	10.1165	11.0182	0.0	0.0	True	False
71991834	Krt6a	ENSMUSG00000058354	0	0	0.0	0.0336	False	False
71587751	Gm93	ENSMUSG00000035420	0.0144034	0	0.1425	0.1146	False	False
70611467	LOC433045	na	na	na	0.24325	0.2628	False	False
70205572	4832428D23Rik	ENSMUSG00000046828	0.0589779	0.0181797	71.8964	79.34385	False	True
75197624	D3Ertd751e	ENSMUSG00000025766	7.98324	6.83287	12.1067	16.5324	True	True
68745215	Zdhhc13	ENSMUSG00000030471	11.9011	12.5319	na	na	True	False
70205578	4833414E09Rik	na	na	na	12.65515	12.5034	False	True
71574449	Atp8b1	ENSMUSG00000039529	0.23966	0.378338	0.0697	0.0866	True	False
70298352	LOC332300	na	na	na	0.99335	0.09075	False	False
69116416	1700093K21Rik	ENSMUSG00000020286	0.138957	0.113527	0.0815	0.0367	True	False
71580198	Psd3	ENSMUSG00000030465	190.651	197.08	0.0347	0.0	True	False
69817874	Rab40b	ENSMUSG00000025170	7.48904	8.72812	1.62275	0.3462	True	True
68191204	Dpyd	ENSMUSG00000033308	1.1268	1.89735	0.0918	0.08905	True	False
71833000	Prkcbp1	ENSMUSG00000039671	29.0525	27.1189	41.3182	39.32225	True	True
1159	Atp5o	ENSMUSG00000022956	32.9503	36.5137	na	na	True	False
71764395	ZBTB45	ENSMUSG00000049600	2.11351	2.16853	24.787	6.7272	True	True
68443202	Gstm1	ENSMUSG00000058135	63.9	72.2789	2.426	1.8372	True	True
1155	Anxa5	ENSMUSG00000027712	19.7444	14.5592	na	na	True	False
69524386	Parp4	ENSMUSG00000054509	0.838559	0.90994	0.0	0.04275	True	False
70795898	Rit1	ENSMUSG00000028057	7.92823	7.30253	1.03355	0.64675	True	True
1151	LOC652668	na	na	na	na	na	False	False
68443208	Cd164	ENSMUSG00000019818	31.6382	31.1008	24.69465	26.18365	True	True
68667772	1700081L11Rik	ENSMUSG00000018412	28.4395	26.8074	47.0634	53.2982	True	True
68410524	Akr1c13	ENSMUSG00000021213	0.13112	0.141781	na	na	True	False
70919029	TC1541413	na	na	na	0.0319	0.12655	False	False
69838242	Emp2	ENSMUSG00000022505	2.21637	2.77768	31.4161	26.2419	True	True
73808355	B230215A15RikASTERISK	na	na	na	na	na	False	False
69672629	Fut11	ENSMUSG00000039357	4.27893	3.88646	2.84465	1.45505	True	True
73497765	2900006K08Rik	ENSMUSG00000057265	4.65151	4.57458	na	na	True	False
68441544	Sdpr	ENSMUSG00000045954	3.12489	2.7822	11.7169	9.8025	True	True
601185	Mthfd2	ENSMUSG00000005667	1.77955	1.71671	na	na	True	False
77454961	Hspb8	ENSMUSG00000041548	6.25581	7.17706	2.2426875	1.62481488	True	True
77454963	Dscr2	ENSMUSG00000022913	6.26531	6.477	25.54535	25.51215	True	True
71570754	4922504M18Rik	ENSMUSG00000051437	0.0059947	0	0.0	0.0	False	False
74431053	TC1482196	na	na	na	0.7261	0.4888	False	False
71570756	4930403L05Rik	na	na	na	1.333	0.29205	False	True
70539166	Ube2e2	ENSMUSG00000058317	46.4513	37.7313	3.4917	1.0166	True	True
71570750	Slc7a2	ENSMUSG00000031596	8.51396	8.79813	3.592	1.25475	True	True
71919170	LOC433071	na	na	na	0.2803	0.2525	False	False
69443178	4933417E01Rik	ENSMUSG00000011263	0.123459	0.1143	4.4479	3.4692	True	True
71570753	1600022D10Rik	na	na	na	0.0	0.05975	False	False
69549641	Mtap2	ENSMUSG00000015222	374.099	397.239	74.58475	74.28345	True	True
69549640	Dnajb5	ENSMUSG00000036052	38.7508	32.7856	71.51845	59.35895	True	True
69549643	Igfbp5	ENSMUSG00000026185	92.4254	119.393	49.1259	52.0978	True	True
69549642	Ahi1	ENSMUSG00000019986	46.4908	64.2043	75.048	81.0981	True	True
69549645	2310008H09Rik	ENSMUSG00000030980	9.47451	9.28975	3.30015	0.46775	True	True
69549644	2010200O16Rik	ENSMUSG00000068732	17.6337	17.0596	0.9379	1.47625	True	True
69549647	Tra2a	ENSMUSG00000029817	25.7877	25.1622	9.18965	5.76795	True	True
68924620	Elac2	ENSMUSG00000020549	4.08654	3.98001	na	na	True	False
79534912	Aqp1	ENSMUSG00000004655	0.00693372	0.0328632	na	na	False	False
69514618	Abcf1	ENSMUSG00000038762	24.0553	24.6427	17.4058	11.0817	True	True
70539163	Atp1a3	ENSMUSG00000040907	465.087	457.305	94.42005	88.81665	True	True
70300073	Gm1257	na	na	na	0.0	0.0	False	False
68157389	AW146242	ENSMUSG00000037788	30.7907	29.839	21.9593	14.31235	True	True
68157387	Tram1l1	ENSMUSG00000044528	12.9556	13.9049	2.616	3.16945	True	True
68632924	1810010M01Rik	ENSMUSG00000049350	0	0	0.0	2.0633	False	True
68157385	Zwint	ENSMUSG00000019923	439.899	524.502	95.1509	117.53655	True	True
69013591	Cds1	ENSMUSG00000029330	16.1959	14.9691	50.26295	48.3306	True	True
69514612	Abcc6	ENSMUSG00000030834	0.0791844	0.00881286	0.2098	0.0	False	False
69012971	Myst2	ENSMUSG00000038909	19.5661	20.296	3.9354	5.4564	True	True
79354814	Pcdha9	na	na	na	27.55335	24.2999	False	True
68321958	Akr1c14	ENSMUSG00000033715	0.599143	0.746208	na	na	True	False
68632673	Kif12	ENSMUSG00000028357	0	0	2.937	2.7905	False	True
68745018	Prosapip1	ENSMUSG00000037703	7.13301	6.55723	43.0646	24.7238	True	True
69980250	Tenr	ENSMUSG00000027719	0.039089	0.0431897	1.84615	1.72595	False	True
68744845	Hnmt	ENSMUSG00000026986	4.92798	4.6008	6.0038	9.2956	True	True
68545539	Prkrip1	ENSMUSG00000039737	5.78728	6.72117	41.5579	45.4093	True	True
69736010	Lamb1-1	ENSMUSG00000002900	3.57606	3.42262	4.3842	1.238	True	True
71210877	Rims3	ENSMUSG00000032890	5.72988	5.28444	12.3283	10.2349	True	True
68744665	Iapp	ENSMUSG00000041681	0	0.0192745	na	na	False	False
79354812	Pcdha8	na	na	na	na	na	False	False
73497507	Fancm	ENSMUSG00000055884	2.95906	3.14985	1.9654	1.8056	True	True
70218612	4933402D24Rik	ENSMUSG00000025961	0.801781	0.770124	0.075	0.0	True	False
72471828	LOC433997	na	na	na	0.0487	0.1875	False	False
69735604	Itgam	ENSMUSG00000030786	6.44369	7.64055	na	na	True	False
70218348	4930550G17Rik	na	na	na	0.0111	0.1754	False	False
70545919	Gats	ENSMUSG00000015944	21.2341	22.3049	39.28265	36.01095	True	True
70218618	4933402E13Rik	ENSMUSG00000045330	0	0	0.1958	0.37685	False	False
70300001	Gm1127	na	na	na	1.1684	0.5212	False	True
74357809	1700013J13RikASTERISK	na	na	na	na	na	False	False
71809509	4930420G21Rik	na	na	na	0.0888	0.1142	False	False
77925721	Efna4	ENSMUSG00000028040	0.0545563	0.0557104	1.635	1.1782	False	True
71283468	2210010B09Rik	ENSMUSG00000058192	9.01376	9.88721	0.361	1.2654	True	True
68666816	Zfp354a	ENSMUSG00000020364	3.94832	4.49166	na	na	True	False
545120	AA408296	ENSMUSG00000016181	4.31908	4.12716	8.8071	6.7865	True	True
545123	Mboat2	ENSMUSG00000020646	18.0415	16.2682	na	na	True	False
74357803	1700012K20RikASTERISK	na	na	na	na	na	False	False
69837461	Dck	ENSMUSG00000029366	10.0385	9.39959	0.4195	0.0	True	False
545126	Angel1	ENSMUSG00000021257	1.76544	1.47328	na	na	True	False
69013371	Ric8b	ENSMUSG00000035620	12.0146	12.632	0.1638	0.3383	True	False
71764751	Gm414	ENSMUSG00000027788	0	0	29.2432	27.646	False	True
70194958	Wasf2	ENSMUSG00000028868	13.6249	12.5607	17.1645	9.8662	True	True
71381115	Tbx4	ENSMUSG00000000094	0.017049	0.005124	6.1677	1.1354	False	True
71919571	Slco6b1	ENSMUSG00000045463	0.0144976	0.00693992	na	na	False	False
69838014	Pou6f1	ENSMUSG00000009739	26.2661	23.2597	32.3766	30.4586	True	True
74056140	Tex13	ENSMUSG00000042386	0	0	na	na	False	False
513231	Igfbp1	ENSMUSG00000020429	0.0114515	0	0.0	0.0	False	False
74562296	Tdrd5	ENSMUSG00000060985	2.91909	3.0641	0.0564	0.0462	True	False
70474893	Lysmd2	ENSMUSG00000032184	9.35809	8.63019	19.2019	11.92505	True	True
71789765	E130308A19Rik	ENSMUSG00000045071	3.46003	2.97311	0.3282	0.04025	True	False
69407660	Rnf43	ENSMUSG00000034177	0.880185	0.823482	3.4465	2.6021	True	True
70445299	Vsx1	ENSMUSG00000033080	0.130441	0.147442	0.0512	0.1056	True	False
68301867	Rps13	ENSMUSG00000090862	0.212687	0.341802	1.1987	7.6947	True	True
73748722	F830221A01RikASTERISK	na	na	na	na	na	False	False
68637886	Tasp1	ENSMUSG00000039033	14.854	14.9638	na	na	True	False
71493657	4930543L23Rik	na	na	na	0.1311	0.0589	False	False
71160961	Mm.33614	na	na	na	14.5311	8.8996	False	True
70445293	Huwe1	ENSMUSG00000025261	134.97	130.5	67.02245	71.27805	True	True
71160967	Exosc5	ENSMUSG00000061286	0.982404	1.087	30.4982	40.1963	True	True
68301646	D13Wsu177e	ENSMUSG00000025869	5.66658	5.30956	1.7612	1.1001	True	True
70201474	1700061G19Rik	ENSMUSG00000024209	0.12115	0.158173	0.04595	0.15825	True	False
71377822	Psmb9	ENSMUSG00000096727	0.767086	1.20887	0.0414	0.0	True	False
70546179	Mib1	ENSMUSG00000024294	45.702	39.0603	30.19175	27.03115	True	True
68301640	Entpd1	ENSMUSG00000048120	4.47655	5.56118	0.1701	3.5862	True	True
71380932	C030002O17Rik	na	na	na	18.1837	15.58085	False	True
74359407	2610002D03RikASTERISK	na	na	na	na	na	False	False
67978511	BC003324	ENSMUSG00000029401	2.3155	2.42824	1.2189	1.90645	True	True
70298136	Gm410	ENSMUSG00000074591	0.3863	0.207902	0.84515	0.1052	True	False
71380938	C130026L21Rik	na	na	na	1.1718	1.9275	False	True
69443541	5830411E10Rik	ENSMUSG00000026107	4.58403	5.10917	1.7455	1.4064	True	True
67978514	Mlycd	ENSMUSG00000074064	2.10529	2.42555	1.62235	0.99475	True	True
71496025	C130074G19Rik	ENSMUSG00000039349	1.33996	0.921852	0.0	0.0	True	False
70542876	Tmco6	ENSMUSG00000006850	1.78327	2.17902	9.6574	4.88765	True	True
71234732	Padi1	ENSMUSG00000025329	0	0	4.0947	4.5154	False	True
75496460	Calb1	ENSMUSG00000028222	4.56752	7.84658	2.7019228	4.67296625	True	True
68301861	Oas1b	ENSMUSG00000029605	0.0690893	0.099269	na	na	False	False
75694266	Lonrf3	ENSMUSG00000016239	1.42107	1.3969	5.0608	5.3958	True	True
70300451	Myct1	ENSMUSG00000046916	0.0959267	0.0826354	8.8766	12.20385	False	True
70723613	Fndc3b	ENSMUSG00000039286	3.6599	3.68051	1.1168	2.4614	True	True
71764577	BC022593	ENSMUSG00000054434	2.68775	3.26103	4.5578	2.5417	True	True
69981037	Tlr12	ENSMUSG00000062545	0.0599422	0.0737284	10.93055	6.5231	False	True
78534498	Slc12a1	ENSMUSG00000027202	0.0431	0.0260962	na	na	False	False
73808432	9430004M15RikASTERISK	na	na	na	na	na	False	False
71764571	Ighg	na	na	na	3.2338	3.2617	False	True
74734914	Olfr734	ENSMUSG00000045306	0	0	0.0	0.0	False	False
68918952	Odf2	ENSMUSG00000026790	22.4702	25.4201	35.3488	36.4351	True	True
1417	Sh3bgr	ENSMUSG00000040666	0.476109	0.684324	36.013	44.3669	True	True
70595720	Lonrf1	ENSMUSG00000039633	11.4938	11.0495	30.6576	24.9873	True	True
70565539	E330032C10	na	na	na	0.0926	0.0	False	False
73808438	9330199L01RikASTERISK	na	na	na	na	na	False	False
76081088	Cenpb	ENSMUSG00000068267	5.72681	5.36367	18.45195	18.7799	True	True
72000164	Rhof	ENSMUSG00000029449	5.83633	6.45906	0.13145	0.15145	True	False
74431819	LOC546247	na	na	na	0.0	0.0	False	False
71789885	Myrip	ENSMUSG00000041794	15.4527	13.8302	38.2971	43.1562	True	True
73927583	5530401F02RikASTERISK	na	na	na	na	na	False	False
71022720	LOC436515	na	na	na	0.6371	0.1852	False	False
2298	Hod	ENSMUSG00000059325	21.9244	29.4461	0.0	0.0	True	False
76081081	Cd38	ENSMUSG00000029084	2.1414	2.09878	5.4073	10.9509	True	True
70298328	Gm761	na	na	na	1.04985	0.85075	False	True
70722978	LOC433176	na	na	na	0.00185	0.0	False	False
76081085	Cdc14b	ENSMUSG00000033102	2.15468	1.8593	8.6883	11.3434	True	True
73927589	5730409H24RikASTERISK	na	na	na	na	na	False	False
68442847	Alg3	ENSMUSG00000033809	5.97312	6.13277	9.7313	9.17315	True	True
69289033	Gata6	ENSMUSG00000005836	0.0051676	0	0.0498	0.2655	False	False
80473471	Snx8	ENSMUSG00000029560	0.686536	0.670792	0.6944	0.943725	True	False
71211659	mCG15583.2	na	na	na	64.94985	65.98255	False	True
75860928	Prm2	ENSMUSG00000038015	0	0	22.99295	24.19185	False	True
73716495	Ccdc46	ENSMUSG00000020728	5.21237	6.36281	0.0389	0.27215	True	False
70302069	Sh3rf2	ENSMUSG00000057719	0.152659	0.146116	21.30765	27.27165	True	True
70203525	Tmem163	ENSMUSG00000026347	9.19599	12.3353	na	na	True	False
69289039	Gcdh	ENSMUSG00000003809	8.24682	9.21801	0.3448	0.1574	True	False
69407720	Glt28d2	ENSMUSG00000031286	0.742187	1.16954	0.5909	0.18545	True	False
71211653	mCG125090.1	na	na	na	0.0	0.1072	False	False
70195090	Zar1	ENSMUSG00000063935	0.0142044	0.0456171	7.5684	0.6596	False	True
556987	Gca	ENSMUSG00000026893	18.7535	13.6242	5.4462	0.79635	True	True
556986	Fahd2a	ENSMUSG00000027371	6.46914	7.94263	3.53695	3.7747	True	True
556985	Armc1	ENSMUSG00000027599	44.5859	43.0324	0.0	0.1235	True	False
556983	Cugbp1	ENSMUSG00000005506	35.9895	36.2707	27.4939	26.7126	True	True
71486995	Clca6	ENSMUSG00000068547	0	0	0.0804	0.0	False	False
73949578	A230073J18RikASTERISK	na	na	na	na	na	False	False
556980	0610037L13Rik	ENSMUSG00000028608	36.1588	41.052	25.37975	22.3829	True	True
79677107	Fgf12	ENSMUSG00000022523	89.301	91.0321	57.5227536	58.8116831	True	True
71281129	Npas4	ENSMUSG00000045903	3.00214	2.22428	na	na	True	False
73949572	A230032E15RikASTERISK	na	na	na	na	na	False	False
556988	Alg12	ENSMUSG00000035845	3.5843	3.65467	2.1148	1.05865	True	True
576417	1110061O04Rik	ENSMUSG00000030269	5.44187	4.1263	5.9152	3.7241	True	True
576416	Atp5o	ENSMUSG00000022956	32.9503	36.5137	55.32388415	65.138112	True	True
576415	Stx4a	ENSMUSG00000030805	38.294	38.7272	31.0529	31.9417	True	True
74514174	Bmp6	ENSMUSG00000039004	1.91692	2.52217	0.55865	1.1455	True	True
69783089	Phip	ENSMUSG00000032253	12.0705	11.8155	0.13535	0.0	True	False
69734512	Gp49a	ENSMUSG00000089672	0.109445	0.0124978	0.0551	0.0	True	False
69524485	AI132487	ENSMUSG00000048856	0.357138	0.28379	0.4342	0.0447	True	False
70200872	1110033M05Rik	ENSMUSG00000064138	12.3262	12.204	6.10585	4.5003	True	True
73584771	Xrra1	ENSMUSG00000035211	0.0933861	0.0778296	0.0033	0.1968	False	False
576419	Lpgat1	ENSMUSG00000026623	52.026	44.8907	71.9814	72.405	True	True
69838254	Cndp1	ENSMUSG00000056162	0.118586	0.149491	0.0	0.15325	True	False
68269034	Asns	ENSMUSG00000029752	73.0922	71.8054	34.8289	30.03045	True	True
79913274	Grp	ENSMUSG00000024517	0.709205	2.68581	1.473810515	4.089722895	True	True
68269036	Pls3	ENSMUSG00000016382	86.0677	93.3982	37.5407	45.87	True	True
76081883	Gmpr	ENSMUSG00000000253	6.12917	6.014	7.1353	7.8698	True	True
75934518	Spint4	ENSMUSG00000017310	0	0	1.25865	1.70855	False	True
68269520	4931406C07Rik	ENSMUSG00000031938	10.4322	10.8514	19.16	15.97015	True	True
69257981	Htr6	ENSMUSG00000028747	0.549998	0.44008	3.5652	3.4237	True	True
74430900	LOC381412	na	na	na	12.3541	10.29945	False	True
69887493	Svs2	ENSMUSG00000040132	0	0	1.92115	0.15865	False	True
70191931	Tnxb	ENSMUSG00000033327	0.121321	0.13462	2.0147	1.395	True	True
69817097	Zbtb33	ENSMUSG00000048047	9.35364	9.60851	5.9232	1.2052	True	True
68269038	2210010A19Rik	ENSMUSG00000022680	26.3646	25.6573	15.13805	16.5862	True	True
70609162	1700101E01Rik	ENSMUSG00000079502	0	0.0149933	0.0776	0.0031	False	False
70194618	Usp18	ENSMUSG00000030107	0.257384	0.273947	0.2018	0.03205	True	False
70239033	E2f7	ENSMUSG00000020185	0.156251	0.167219	3.1494	3.86715	True	True
69838420	Dhx38	ENSMUSG00000037993	2.36991	2.52769	1.5467	1.3826	True	True
2180	Ei24	ENSMUSG00000062762	36.9687	37.6097	na	na	True	False
70724756	Gpr103	ENSMUSG00000058400	8.4894	4.59569	0.74395	0.29065	True	False
2186	Elk1	ENSMUSG00000009406	11.4455	11.0899	12.9061	10.1109	True	True
71209898	Mm.359155	na	na	na	0.04855	0.0	False	False
2184	Eif5a	ENSMUSG00000078812	68.2894	68.378	na	na	True	False
69874198	Smurf2	ENSMUSG00000018363	14.6992	14.8967	0.2	0.0	True	False
71209961	Mm.359971	na	na	na	0.33	1.1531	False	True
70302860	Ttf2	ENSMUSG00000033222	0.228493	0.212337	0.0	0.11895	True	False
71213794	D030034H08	na	na	na	0.71555	0.94785	False	False
71991756	2310007L24Rik	ENSMUSG00000009210	0	0.0213697	na	na	False	False
71608208	Scg5	ENSMUSG00000023236	58.6826	53.6507	94.6078	89.6695	True	True
79913272	Epha4	ENSMUSG00000026235	52.1577	35.667	42.6848	33.4612	True	True
71608204	Gabarapl1	ENSMUSG00000030161	150.55	145.759	87.1858	89.3781	True	True
69526725	Apc	ENSMUSG00000005871	143.408	133.685	45.3653	48.3545	True	True
71608206	Mapk3	ENSMUSG00000063065	94.6332	118.806	19.654	23.9069	True	True
71280874	Ddx54	ENSMUSG00000029599	2.47192	2.27156	22.5361	22.1883	True	True
71608200	Rap1gds1	ENSMUSG00000028149	81.9093	60.2856	88.94885	80.59635	True	True
71608201	Ppp3r1	ENSMUSG00000033953	321.611	262.013	68.78925	66.1711	True	True
71608202	Rnf34	ENSMUSG00000029474	23.8975	24.0565	32.2604	27.85975	True	True
71608203	Agtr2	ENSMUSG00000068122	0.0876772	0.67435	0.03145	0.03385	True	False
68633279	Fibp	ENSMUSG00000024911	9.41346	10.9988	na	na	True	False
70786713	LOC433707	na	na	na	0.03705	0.00845	False	False
70786864	LOC433829	na	na	na	4.0761	6.4059	False	True
73512519	mCG147636	na	na	na	30.9769	35.4083	False	True
72004445	Trim14	ENSMUSG00000039853	0.124746	0.175604	0.4171	0.1513	True	False
74743435	Cox5b	na	na	na	45.21635	42.3595	False	True
69735210	Idh3b	ENSMUSG00000027406	136.389	137.574	45.7379	41.5124	True	True
73512515	mCG7931.2	na	na	na	0.0	0.0	False	False
73512516	Ppig	ENSMUSG00000042133	58.9797	58.2887	0.34505	0.0981	True	False
73512517	2010107H07Rik	na	na	na	0.0	0.0	False	False
70295476	L3mbtl3	ENSMUSG00000039089	6.09403	6.49823	16.1872	16.43255	True	True
73512513	TC1413866	na	na	na	4.29705	2.1295	False	True
69449026	A830007L07Rik	ENSMUSG00000046378	11.4072	12.3827	na	na	True	False
150	Usp48	ENSMUSG00000043411	48.2874	48.122	6.2383	10.1053	True	True
153	BC039093	ENSMUSG00000028799	4.79427	4.5894	na	na	True	False
152	BC039093	ENSMUSG00000028799	4.79427	4.5894	na	na	True	False
155	Bcan	ENSMUSG00000004892	12.2191	11.2547	na	na	True	False
69449020	Ankrd43	ENSMUSG00000044352	27.9818	35.3986	9.7857	11.0178	True	True
156	Bcan	ENSMUSG00000004892	12.2191	11.2547	na	na	True	False
75694417	Tgfb2	ENSMUSG00000039239	1.97106	2.02146	na	na	True	False
71280709	Cldn7	ENSMUSG00000018569	0	0.0275997	0.01085	0.2083	False	False
73712726	Tnfaip8	ENSMUSG00000062210	1.69625	2.13824	na	na	True	False
78633998	Slc24a1	ENSMUSG00000034452	0.264033	0.28037	0.8279	0.7321	True	False
68545723	4733401H18Rik	ENSMUSG00000070283	18.7121	19.8823	5.6259	4.9986	True	True
73513609	C430042M11Rik	na	na	na	0.59495	0.37365	False	False
70787402	LOC434089	na	na	na	38.1393	57.4611	False	True
71393424	Htr2c	ENSMUSG00000041380	2.18329	3.17538	na	na	True	False
69257600	Gpr6	ENSMUSG00000046922	3.26186	3.81385	3.7618	5.5575	True	True
69626693	Ddhd2	ENSMUSG00000061313	15.6128	14.7772	3.9187	2.48015	True	True
73513603	Anks1b	ENSMUSG00000058589	234.32	258.419	74.71735	74.11075	True	True
70787408	LOC434100	na	na	na	0.0	0.2134	False	False
68545729	Arhgap15	ENSMUSG00000049744	1.13042	0.932521	0.84865	0.67565	True	False
2236	Frs3	ENSMUSG00000023266	2.49757	2.15922	0.0084	0.0	True	False
69526880	Armc3	ENSMUSG00000037683	0.0317744	0.0577432	0.2275	0.2898	False	False
70230975	Apba2bp	ENSMUSG00000027489	25.5984	27.3677	7.4191	7.4542	True	True
68445644	Hacl1	ENSMUSG00000021884	2.97455	2.56921	na	na	True	False
70278003	Ifitm7	ENSMUSG00000065968	0.646576	0.491368	0.0	0.0	True	False
68193047	Pip5k1c	ENSMUSG00000034902	27.6001	24.264	53.8487	43.3933	True	True
70278009	Ifnk	ENSMUSG00000042993	0.0653	0.0217445	0.0	0.0	False	False
68193046	Minpp1	ENSMUSG00000024896	13.2243	13.9039	3.1033	1.1383	True	True
80514077	Clic5	ENSMUSG00000023959	1.58146	1.04925	na	na	True	False
74736159	LOC385446	na	na	na	0.0	0.07495	False	False
80514075	Mlf1	ENSMUSG00000048416	0.214624	0.219225	1.6433	0.8661	True	True
69782915	Pdcl3	ENSMUSG00000026078	7.53295	7.77811	2.59735	2.02	True	True
74736324	LOC436200	na	na	na	0.00065	0.00015	False	False
70598396	1700007I06Rik	ENSMUSG00000044056	0.842976	0.813254	0.1303	0.013	True	False
70598395	1500015L24Rik	na	na	na	0.0	0.0	False	False
71920165	1700057K13Rik	ENSMUSG00000026592	0.105591	0.0298335	2.6664	0.3626	True	True
70598393	1500001M20Rik	ENSMUSG00000030316	5.76653	5.3641	0.00315	0.0	True	False
70598392	Amdhd1	ENSMUSG00000015890	0.0629786	0.288077	0.0	0.07375	True	False
70598391	Tha1	ENSMUSG00000017713	0.537172	0.59576	0.0107	0.0	True	False
70598390	Ero1lb	ENSMUSG00000057069	8.64777	7.99619	12.50595	4.1688	True	True
70473945	Phlda3	ENSMUSG00000041801	2.86206	2.18369	0.5042	0.5688	True	False
73927637	6820433M10RikASTERISK	na	na	na	na	na	False	False
71280658	Papss1	ENSMUSG00000028032	12.8879	12.8571	9.6106	9.9894	True	True
73927631	6430500J09RikASTERISK	na	na	na	na	na	False	False
69257289	Gabrg1	ENSMUSG00000001260	3.80344	4.46584	0.4409	0.23355	True	False
70300768	Pggt1b	ENSMUSG00000024477	6.72039	6.27147	na	na	True	False
68545899	Il4	ENSMUSG00000000869	1.62289	2.18164	na	na	True	False
2726	Wnt10b	ENSMUSG00000022996	0.106474	0.130507	1.1104	1.1459	True	True
79906735	Dlx1as	na	na	na	na	na	False	False
2720	Wdr31	ENSMUSG00000028391	2.16099	2.74227	0.2504	2.6272	True	True
68799004	Nell2	ENSMUSG00000022454	86.5921	84.5391	84.7435	95.4978	True	True
68545893	Cdc42ep2	ENSMUSG00000045664	4.30586	3.05109	0.1434	0.0033	True	False
71587565	Dnase2b	ENSMUSG00000028185	0	0.0184569	38.077	27.1089	False	True
75828167	Tspan14	ENSMUSG00000037824	5.13802	6.14414	20.7735	21.26685	True	True
69529023	Efcab4a	ENSMUSG00000048200	0.292491	0.791405	5.5116	4.7984	True	True
68545545	Rprm	ENSMUSG00000075334	4.03381	4.74113	23.3292	34.0609	True	True
68076899	Rbp1	ENSMUSG00000046402	1.74818	2.354	na	na	True	False
69735843	Klhdc1	ENSMUSG00000051890	10.9111	12.8278	3.43645	7.42945	True	True
69236688	Tnnc2	ENSMUSG00000017300	0.0806617	0.0482136	3.9877	1.0672	False	True
68844092	Cog1	ENSMUSG00000018661	11.3227	11.1351	42.1264	45.0695	True	True
68637653	Kng1	ENSMUSG00000022875	0	0	6.5093	3.343	False	True
69529029	Ccdc102a	ENSMUSG00000063605	0.105477	0.189298	2.93	2.06245	True	True
68151348	Osta	ENSMUSG00000035699	0	0.0423568	0.0277	0.0145	False	False
71610778	Ap1m1	ENSMUSG00000003033	11.4377	10.6035	11.28725	7.38685	True	True
68844098	Med12	ENSMUSG00000079487	16.043	17.2502	22.7187	29.1626	True	True
413778	Psma1	ENSMUSG00000030751	26.7722	26.1144	16.6184	18.08625	True	True
69735849	Klhl1	ENSMUSG00000022076	0.161736	0.303165	0.0	0.0	True	False
69116775	D030070L09Rik	ENSMUSG00000047989	6.72454	6.32664	0.0014	0.0	True	False
75990638	Dph5	ENSMUSG00000033554	4.81631	4.71871	8.30935	8.5623	True	True
74357587	5730409G15Rik	ENSMUSG00000022544	2.20382	1.91424	0.0	0.0	True	False
71022591	Ldlrad2	ENSMUSG00000094035	0	0	0.06825	0.0	False	False
69448954	A730018C14Rik	na	na	na	0.0	0.0	False	False
69170270	Tfpt	ENSMUSG00000006335	4.44931	4.70082	na	na	True	False
69783083	Phf16	ENSMUSG00000037315	5.78326	5.90855	0.0344	0.05645	True	False
70596155	LOC381980	na	na	na	0.0	0.0	False	False
74734985	Olfr868	ENSMUSG00000044106	0	0	0.15465	0.0	False	False
74357589	Gdi1	ENSMUSG00000015291	210.233	220.58	83.17225	89.36165	True	True
71212506	mCG147020	na	na	na	na	na	False	False
69170276	Tfpi	ENSMUSG00000027082	2.80627	3.55915	6.7346	10.1009	True	True
73617546	1700040D17Rik	na	na	na	0.0	0.0	False	False
77620499	Tgds	ENSMUSG00000022130	1.52843	1.53299	12.62475	12.9338	True	True
72076533	LOC436390	na	na	na	0.1138	0.0	False	False
71210265	Mm.41035	na	na	na	0.0	0.0	False	False
71991983	Gm614	ENSMUSG00000090141	0	0	0.0	0.0	False	False
68920878	Creld2	ENSMUSG00000023272	3.73248	3.94509	8.82895	7.36975	True	True
68151415	Ibrdc2	ENSMUSG00000038068	4.77161	4.59604	na	na	True	False
77620491	Tnrc6b	ENSMUSG00000047888	18.3391	17.4605	49.51195	39.47565	True	True
75988239	Adfp	ENSMUSG00000028494	1.33771	2.25288	8.1803	9.0892	True	True
68861711	3230401M21Rik	ENSMUSG00000073434	2.08028	2.2927	15.1476	16.2893	True	True
69735311	Ihpk1	ENSMUSG00000032594	19.4633	22.1249	35.57655	33.9312	True	True
68861717	Bdh1	ENSMUSG00000046598	6.71706	6.70376	33.6634	35.6757	True	True
77620497	Fen1	ENSMUSG00000024742	1.16734	1.1178	2.416	0.8723	True	True
72472442	Gm118	ENSMUSG00000074764	0	0	0.0642	0.0959	False	False
69526558	Alox12	ENSMUSG00000000320	0.305839	0.175373	0.0475	0.0	True	False
68342069	Sycn	ENSMUSG00000084174	0	0	1.12715	0.70075	False	True
69735598	Itgal	ENSMUSG00000030830	0.603465	0.338848	0.15595	0.2398	True	False
68161478	Phca	ENSMUSG00000030760	5.55737	4.84476	0.0	0.009	True	False
70201277	1700016C15Rik	ENSMUSG00000015962	0	0	1.5823	2.4167	False	True
68151410	Atpbd4	ENSMUSG00000057147	15.4964	15.0947	na	na	True	False
74635376	mCG145897	na	na	na	0.0686	0.1787	False	False
72004448	Trim8	ENSMUSG00000025034	7.28765	7.55296	na	na	True	False
81600122	Hic1	ENSMUSG00000043099	0.235017	0.172969	na	na	True	False
69735592	Itgae	ENSMUSG00000005947	0.0376881	0.0496868	0.1194	0.10475	False	False
79541444	Mrgprf	ENSMUSG00000031070	0.124902	0.272239	na	na	True	False
72472441	Zfp408	ENSMUSG00000075040	3.33019	3.31216	0.0692	0.30115	True	False
68499479	Plekhc1	ENSMUSG00000037712	28.8056	27.463	10.0525	9.37535	True	True
73653368	Olfr283	ENSMUSG00000056184	0.033106	0.036565	0.17735	0.0383	False	False
71991989	LOC433683	na	na	na	0.0	0.0	False	False
81600124	Hoxa4	ENSMUSG00000000942	0	0	na	na	False	False
69782664	Padi3	ENSMUSG00000025328	0	0	18.4945	22.634	False	True
68633273	Ankrd49	ENSMUSG00000031931	12.0119	13.0706	4.5967	6.7712	True	True
68499473	B3gnt7	ENSMUSG00000079445	0.166722	0.164796	na	na	True	False
71158919	Mm.323861	na	na	na	0.0	0.0	False	False
76003564	Ndfip2	ENSMUSG00000053253	69.0807	56.1741	21.8315	18.89715	True	True
76003567	Nphp1	ENSMUSG00000027378	3.01773	3.5757	2.9924	4.7182	True	True
70237998	Creg1	ENSMUSG00000040713	9.12643	9.96379	5.7574	2.5567	True	True
393201	Tef	ENSMUSG00000022389	45.544	49.0342	62.7043	82.83105	True	True
81654083	Spdef	ENSMUSG00000024215	0.0448097	0.0202513	na	na	False	False
71616166	Tk1	ENSMUSG00000025574	1.00684	1.07787	6.664	5.9337	True	True
69114950	Zdhhc25	ENSMUSG00000054117	0	0	na	na	False	False
69114956	1700125H20Rik	ENSMUSG00000018479	0.031945	0.126934	0.0363	0.00065	True	False
71494672	A330043C09Rik	na	na	na	0.26715	0.4603	False	False
819	Plxnb2	ENSMUSG00000036606	4.76815	6.01366	na	na	True	False
68667210	BC034204	ENSMUSG00000032109	0.600036	0.809447	1.0689	3.3328	True	True
68667216	Lefty1	ENSMUSG00000038793	0.207214	0.187509	na	na	True	False
68196911	Tcp11l2	ENSMUSG00000020034	5.43933	5.32482	0.0	0.2043	True	False
68203511	Prmt7	ENSMUSG00000060098	7.39048	6.77838	0.7097	0.09235	True	False
71991798	Tmem52	ENSMUSG00000023153	0.0425935	0.0942169	0.0444	0.0091	False	False
810	Pld3	ENSMUSG00000003363	152.74	135.714	na	na	True	False
71494678	A330068P14Rik	ENSMUSG00000040543	14.5296	13.3684	8.0439	5.19165	True	True
813	Plp1	ENSMUSG00000031425	316.901	182.385	na	na	True	False
68845412	Dll4	ENSMUSG00000027314	0.157093	0.158205	na	na	True	False
70238609	D130060J02Rik	na	na	na	0.0	0.2848	False	False
816	Plxdc1	ENSMUSG00000017417	9.23633	7.02887	na	na	True	False
69059949	Cherp	ENSMUSG00000052488	7.35447	7.81181	56.28275	54.3802	True	True
81671344	Htr2a	ENSMUSG00000034997	4.80016	5.79911	15.0582	14.4492	True	True
81671346	Grm3	ENSMUSG00000003974	42.1911	37.8746	na	na	True	False
69202376	2310014L17Rik	ENSMUSG00000033967	0.182023	0.123207	0.42915	0.05565	True	False
74580709	4930583I09Rik	ENSMUSG00000024088	0	0.128142	0.2991	0.05225	True	False
69202370	2310014H01Rik	ENSMUSG00000034595	0.820543	0.977384	102.71925	118.9943	True	True
386243	Mal	ENSMUSG00000027375	80.3955	43.9159	31.4096	22.8386	True	True
70528073	4931406I20Rik	ENSMUSG00000028677	42.4241	40.9397	27.0628	17.75085	True	True
1082	Tubb4	ENSMUSG00000062591	366.149	336.808	na	na	True	False
74580703	4930597O21Rik	ENSMUSG00000053442	2.03692	2.21543	0.13665	0.0	True	False
68161474	Mkrn2	ENSMUSG00000000439	8.989	9.5316	0.12695	0.2009	True	False
68080705	1110032O16Rik	ENSMUSG00000060538	4.83281	4.94998	0.4579	0.1969	True	False
73834361	D130051O21RikASTERISK	na	na	na	na	na	False	False
70305377	Abcc10	ENSMUSG00000032842	1.15782	1.2384	9.2523	7.4405	True	True
68080706	LOC218805	na	na	na	na	na	False	False
70305371	A930012M17	na	na	na	21.217	19.58	False	True
68161477	Hnrpa3	ENSMUSG00000059005	20.2036	21.2449	24.2584	19.0615	True	True
70611168	LOC432658	na	na	na	0.57715	0.39155	False	False
68080702	Aldh18a1	ENSMUSG00000025007	6.19853	5.09772	na	na	True	False
71763735	B230118H07Rik	ENSMUSG00000027165	16.337	14.7126	0.1717	0.00615	True	False
69257564	Ffar1	ENSMUSG00000044453	0	0	na	na	False	False
69013167	Myo1e	ENSMUSG00000032220	6.00986	4.63022	0.15965	0.05575	True	False
68910974	Dynlt3	ENSMUSG00000031176	102.886	92.7214	18.70275	9.2825	True	True
68798753	Abcb9	ENSMUSG00000029408	3.03172	2.8672	19.1974	13.053	True	True
1700	Dner	ENSMUSG00000036766	29.6938	32.4356	30.7309	39.2901	True	True
71656135	Polm	ENSMUSG00000020474	1.73281	1.75275	0.10055	0.33805	True	False
1702	Egfr	ENSMUSG00000020122	4.16026	4.4802	na	na	True	False
77924538	Vipr1	ENSMUSG00000032528	5.83009	4.22801	na	na	True	False
1704	Eif5	ENSMUSG00000021282	72.5805	67.0096	3.7564	5.2109	True	True
72081795	Akap13	ENSMUSG00000066406	5.49511	7.04896	0.03465	0.126	True	False
1706	Eps8	ENSMUSG00000015766	12.5462	16.2965	na	na	True	False
67764937	Dctn4	ENSMUSG00000024603	34.2832	34.5994	38.941	33.346	True	True
1708	Eps8l1	ENSMUSG00000006154	10.8832	11.9522	na	na	True	False
68562926	Fkbp9	ENSMUSG00000029781	6.25117	5.74945	0.2267	0.7355	True	False
70785000	Rab33a	ENSMUSG00000031104	6.96974	7.03498	0.10875	0.0	True	False
69117134	Cxcl4	ENSMUSG00000029373	1.41818	2.01083	0.0	0.0	True	False
69671893	Edn3	ENSMUSG00000027524	1.85745	2.04706	21.3702	17.2766	True	True
67764935	Dtx2	ENSMUSG00000004947	1.46573	1.38034	0.0	0.0	True	False
69117422	Calb2	ENSMUSG00000003657	0.784902	3.16288	na	na	True	False
69117423	Nov	ENSMUSG00000037362	31.5023	41.8101	na	na	True	False
70296032	Gm263	ENSMUSG00000090812	1.97359	1.49959	1.15985	0.87145	True	True
69736203	Lpin3	ENSMUSG00000027412	0.0634746	0.0561836	0.73105	0.7324	False	False
69838358	Pfkfb3	ENSMUSG00000026773	5.11797	4.05841	4.62275	1.58775	True	True
68193010	Calb1	ENSMUSG00000028222	4.56752	7.84658	na	na	True	False
69671899	Efcbp1	ENSMUSG00000040536	182.864	154.076	51.7749	53.4151	True	True
68193016	Rag1ap1	ENSMUSG00000027953	9.27864	7.74702	0.4935	0.04795	True	False
70296038	Gm271	na	na	na	0.0483	0.0	False	False
69816374	Pnma2	ENSMUSG00000046204	18.3686	20.0981	8.32495	5.978	True	True
68193015	2410075B13Rik	ENSMUSG00000098176	0.102039	0.107753	5.3209	2.96175	True	True
68797511	C030004A17Rik	ENSMUSG00000050471	10.5399	9.78343	2.4124	3.332	True	True
68797510	2600010E01Rik	ENSMUSG00000032841	2.84799	1.3949	na	na	True	False
68797513	Gopc	ENSMUSG00000019861	11.9889	11.2819	21.61155	20.01455	True	True
68797512	BC048390	ENSMUSG00000047026	0.0856571	0.118038	0.0	0.0845	True	False
68797515	Spaca1	ENSMUSG00000028264	0.0128508	0.0388852	0.0	0.00545	False	False
70528258	Atp4a	ENSMUSG00000005553	0.141255	0.327106	0.0942	0.0	True	False
68745012	Il13ra1	ENSMUSG00000017057	1.02332	1.14848	na	na	True	False
68797518	Rbm27	ENSMUSG00000024491	14.5932	14.8459	0.0403	0.1031	True	False
80342301	Ngp	ENSMUSG00000032484	0.0147648	0.0272789	na	na	False	False
70528252	Atad2	ENSMUSG00000022360	1.95886	1.3758	0.0014	0.0	True	False
73635471	Mm.5547	na	na	na	10.8777	6.911	False	True
73834505	E030025L23RikASTERISK	na	na	na	na	na	False	False
70194600	Uros	ENSMUSG00000030979	6.51097	6.93614	0.0283	0.31805	True	False
70565321	Tdo2	ENSMUSG00000028011	0.367481	0.404842	0.474	0.7185	True	False
71381064	Lama1	ENSMUSG00000032796	0.48968	0.59426	0.34715	0.08035	True	False
70565327	Timp4	ENSMUSG00000030317	9.02402	8.72782	0.22205	0.30335	True	False
71020764	Mpdz	ENSMUSG00000028402	22.5289	22.5681	16.87555	15.4171	True	True
73808225	4930516O21RikASTERISK	na	na	na	na	na	False	False
69528040	Baalc	na	na	na	29.9832	26.6842	False	True
70725507	4930447K03Rik	na	na	na	0.04105	0.17275	False	False
69528046	Bace1	ENSMUSG00000032086	26.1207	26.9392	18.20935	15.15075	True	True
68342300	Hip1	ENSMUSG00000039959	4.82383	4.88836	na	na	True	False
71325390	Rab8a	ENSMUSG00000003037	5.90138	5.73051	0.0432	0.0517	True	False
75827109	D11Ertd636e	ENSMUSG00000018727	0.57251	0.993157	3.3182	2.9112	True	True
71495861	B230104C08Rik	na	na	na	0.0594	0.0	False	False
70946503	Six3os1	na	na	na	2.28905	1.53315	False	True
70231761	5830428H23Rik	na	na	na	5.88865	8.03085	False	True
70946505	E330016A19Rik	ENSMUSG00000032344	0.459332	0.504479	0.2716	0.3265	True	False
70231767	Cspp1	ENSMUSG00000056763	20.4693	19.1118	0.45885	0.21235	True	False
68633404	Snrpb2	ENSMUSG00000008333	20.2418	19.1276	7.9695	8.5428	True	True
2098	Chrnb2	ENSMUSG00000027950	6.20385	7.13593	na	na	True	False
1090	Ucn3	ENSMUSG00000044988	0.0129292	0	0.149	0.23395	False	False
68341615	Oas1g	ENSMUSG00000066861	0.0117596	0.044262	0.6857	0.2083	False	False
68744474	Edaradd	ENSMUSG00000095105	0.0967392	0.108066	2.2	1.1256	True	True
69028288	Drbp1	ENSMUSG00000042369	5.71929	6.19406	12.8982	13.83145	True	True
75692892	C230095G01Rik	ENSMUSG00000048108	0.0179104	0.0253172	18.3273	18.8685	False	True
69028420	Ythdf3	ENSMUSG00000047213	21.7123	20.1989	37.55115	30.08405	True	True
68269276	Sbds	ENSMUSG00000025337	25.7478	23.1675	70.48125	70.4963	True	True
70218115	4930407I10Rik	ENSMUSG00000075524	0	0	0.5665	0.29255	False	False
70724643	Cetn1	ENSMUSG00000050996	0	0	0.0	0.0	False	False
69873624	Sfpq	ENSMUSG00000028820	81.1404	81.5118	61.14775	65.50735	True	True
68919964	Stk36	ENSMUSG00000033276	0.798935	1.03191	0.2468	0.0587	True	False
69169337	Ddx47	ENSMUSG00000030204	17.9253	17.4765	5.937	4.34195	True	True
70608448	LOC432406	na	na	na	0.12095	0.0416	False	False
71161375	Oraov1	ENSMUSG00000031072	5.10834	5.73994	0.17785	0.192	True	False
69837850	6720456H20Rik	ENSMUSG00000036339	5.71828	5.37956	1.8973	1.707	True	True
68920701	Zfp414	ENSMUSG00000073423	17.4156	17.1335	0.0	0.0966	True	False
69013780	Cygb	ENSMUSG00000020810	6.11844	9.36047	26.70095	33.27105	True	True
70523810	Slfn4	ENSMUSG00000000204	0	0.004448	0.0889	0.0	False	False
68562944	Slc26a2	ENSMUSG00000034320	4.22558	4.54666	5.1554	7.578	True	True
68158091	Fvt1	ENSMUSG00000009905	6.60452	6.81061	8.44715	6.323	True	True
70919310	Ace	ENSMUSG00000020681	2.54372	3.40544	0.04705	0.07555	True	False
69353747	1700066M21Rik	ENSMUSG00000038323	17.1175	14.4365	1.63785	0.02425	True	True
71213683	Tns3	ENSMUSG00000020422	8.83037	8.18581	0.9365	1.3945	True	True
69353741	1700065A05Rik	na	na	na	0.1513	0.0641	False	False
69514422	Dennd2c	ENSMUSG00000007379	0.155333	0.179902	0.2241	0.1257	True	False
70919316	Ampd3	ENSMUSG00000005686	5.3988	5.72914	0.0027	0.03795	True	False
75694722	Mxd4	ENSMUSG00000037235	5.3711	6.74989	34.3544	42.49245	True	True
69548903	Chd1l	ENSMUSG00000028089	1.45605	1.42389	0.0577	0.02415	True	False
76135594	Lrrc46	ENSMUSG00000020878	0.1863	0.153581	7.21615	5.1079	True	True
69514428	A930011G23Rik	na	na	na	16.919	23.3053	False	True
73424295	Smc1b	ENSMUSG00000022432	0.0306457	0.0729622	0.0095	0.0	False	False
71393286	Tkt	ENSMUSG00000021957	7.49731	7.35959	6.7243	11.125	True	True
68744785	Mrpl27	ENSMUSG00000024414	18.7109	20.1827	na	na	True	False
70295697	Gm381	na	na	na	0.0055	0.0	False	False
68444684	Tbc1d22a	ENSMUSG00000051864	2.05315	2.4155	0.16265	0.32685	True	False
69134505	Mlh3	ENSMUSG00000021245	7.91747	7.74434	na	na	True	False
70194498	Ube2b	ENSMUSG00000020390	117.812	111.887	21.816	11.47085	True	True
74265177	4930564D02RikASTERISK	na	na	na	na	na	False	False
70784600	LOC436226	na	na	na	0.0002	0.0	False	False
68845239	Gabra5	ENSMUSG00000055078	81.2315	75.0299	na	na	True	False
70784606	LOC436246	na	na	na	0.0097	0.0	False	False
70918922	Gna-rs1	ENSMUSG00000024429	10.927	11.4138	5.91195	3.1642	True	True
68745378	Slc22a20	ENSMUSG00000037451	0	0	na	na	False	False
74265171	4930597L12RikASTERISK	na	na	na	na	na	False	False
73606675	Cnnm2	ENSMUSG00000064105	5.18865	4.89054	14.98485	13.2689	True	True
71487019	Amn	ENSMUSG00000021278	1.18294	0.873317	0.0	0.0	True	False
69816960	Taf1b	ENSMUSG00000059669	9.49107	10.2681	1.7352	1.76115	True	True
68745131	Sirpa	ENSMUSG00000037902	72.0171	80.5288	97.5502	119.2398	True	True
73748644	F830018J01RikASTERISK	na	na	na	na	na	False	False
74579410	5830416P10Rik	na	na	na	0.1468	0.11145	False	False
68162209	Gsto2	ENSMUSG00000025069	0.341099	0.302088	0.01825	0.00105	True	False
68162208	BC030476	ENSMUSG00000044726	0.86635	0.434533	1.6532	0.0175	True	True
70795349	Baiap3	ENSMUSG00000047507	0.625759	1.23201	0.5138	2.3283	True	True
74579416	4930553J12Rik	na	na	na	0.32565	0.01095	False	False
68162203	Amotl2	ENSMUSG00000032531	1.28469	1.27244	1.45375	0.16465	True	True
68162202	AI315068	ENSMUSG00000033653	7.21895	7.10632	17.81785	13.91455	True	True
71764144	Bcam	ENSMUSG00000002980	1.00817	0.902572	0.86205	1.039	True	True
68162200	Gatad2a	ENSMUSG00000036180	4.97017	3.97107	3.0627	0.29875	True	True
68162206	Fut10	ENSMUSG00000046152	2.1927	1.83077	0.46845	0.00135	True	False
68162205	Lrrc21	ENSMUSG00000041044	0	0.00345341	0.0795	0.0	False	False
68162204	Rtn4	ENSMUSG00000020458	333.922	276.978	90.8283	90.91945	True	True
69014925	Lipl2	ENSMUSG00000024771	0.0761664	0.0577762	0.60285	0.14745	False	False
68443411	Exosc5	ENSMUSG00000061286	0.982404	1.087	na	na	True	False
67979035	Tspan1	ENSMUSG00000028699	0.171311	0.170356	0.0	0.1407	True	False
67979034	1200013P24Rik	ENSMUSG00000005982	25.6187	28.0962	na	na	True	False
67979033	Arf6	ENSMUSG00000044147	8.80623	8.26138	na	na	True	False
68341412	D10Jhu81e	ENSMUSG00000053329	3.95757	3.73127	20.512	29.7185	True	True
67979031	Arpc1b	ENSMUSG00000029622	6.8923	5.85476	na	na	True	False
71612223	Rpp14	ENSMUSG00000023156	12.7729	12.0039	4.72225	4.98525	True	True
70787143	LOC433948	na	na	na	0.0	0.0	False	False
69028683	Idh2	ENSMUSG00000030541	4.84943	5.79662	0.4856	0.4479	True	False
69817787	Qrsl1	ENSMUSG00000019863	7.11678	7.35292	0.0766	0.0	True	False
70218534	Hdac4	ENSMUSG00000026313	10.7579	10.1531	6.93495	5.2782	True	True
67979039	Tmem79	ENSMUSG00000001420	0.0262558	0.0320577	na	na	False	False
68341418	Adcy4	ENSMUSG00000022220	0.320954	0.186401	3.12125339	1.58824529	True	True
69012783	Sfi1	ENSMUSG00000023764	2.03864	1.84451	25.6593	24.42185	True	True
71210460	Mm.8924	na	na	na	0.12795	0.1056	False	False
71020891	Rnf150	ENSMUSG00000047747	30.7329	29.9238	16.2991	10.4287	True	True
71210466	Mm.91240	na	na	na	0.3278	0.0	False	False
74265285	5430411C19RikASTERISK	na	na	na	na	na	False	False
69012789	Rapgef5	ENSMUSG00000041992	22.2879	24.56	na	na	True	False
70430772	Zkscan1	ENSMUSG00000029729	17.9924	18.3995	28.0107	24.9453	True	True
70474881	Dnajc19	ENSMUSG00000027679	9.46946	9.33063	na	na	True	False
74431558	LOC432647	na	na	na	0.42005	0.09865	False	False
71569356	AI324046	na	na	na	0.0	0.0	False	False
69531019	Syde2	ENSMUSG00000036863	0.847058	0.889694	0.0	0.0424	True	False
68301252	Aadat	ENSMUSG00000057228	0.0283022	0.0759953	na	na	False	False
68745251	Dbndd1	ENSMUSG00000031970	1.97013	1.9361	na	na	True	False
74431552	F830001A07Rik	na	na	na	3.4964	1.09585	False	True
70231839	Bves	ENSMUSG00000071317	0.600158	0.72932	na	na	True	False
69531013	1110028C15Rik	ENSMUSG00000026004	10.7749	9.86282	0.0	0.1984	True	False
70919525	Maea	ENSMUSG00000079562	15.13	15.0671	13.36455	4.4067	True	True
68745257	Htf9c	ENSMUSG00000022721	6.62817	7.81762	na	na	True	False
71234655	Nphp4	ENSMUSG00000039577	2.21427	1.8021	3.5699	3.7796	True	True
77799003	Enam	ENSMUSG00000029286	0.00241801	0	2.887	3.241	False	True
71892107	4932414N04Rik	ENSMUSG00000079324	0	0	0.0	0.0	False	False
74357606	Uck1	ENSMUSG00000002550	2.08763	2.55889	3.85045	4.4706	True	True
71608433	Tmco3	ENSMUSG00000038497	3.92512	4.12221	2.91505	2.3191	True	True
72000165	Rnf152	ENSMUSG00000047496	2.41755	1.6151	0.0042	0.0744	True	False
71892101	4933406B17Rik	na	na	na	0.0	0.03025	False	False
69671690	E030013G06Rik	ENSMUSG00000030889	0.665485	1.14971	0.0305	0.03175	True	False
74734740	Olfr615	ENSMUSG00000073947	0	0	0.312	0.0	False	False
69526378	Tmem16k	ENSMUSG00000037949	1.92817	1.94051	0.673	0.6983	True	False
73906125	7420456B02RikASTERISK	na	na	na	na	na	False	False
68523180	Rasip1	ENSMUSG00000044562	0.456517	0.755574	0.0416	0.29025	True	False
69530726	C030018G13Rik	na	na	na	45.8852	45.80655	False	True
69734584	Grb2	ENSMUSG00000059923	9.41237	10.07	6.4356	4.2822	True	True
69202615	Glt8d1	ENSMUSG00000021916	5.40103	5.80085	30.85245	29.0995	True	True
79913447	Cnr1	ENSMUSG00000044288	51.2255	61.6701	na	na	True	False
70430818	Arih1	ENSMUSG00000025234	46.6304	43.5091	38.4997	37.3171	True	True
68563013	Aox1	ENSMUSG00000063558	1.11107	1.21784	na	na	True	False
74736510	LOC547022	na	na	na	0.3302	0.0935	False	False
70295715	Taar5	ENSMUSG00000069706	0	0	0.62415	3.936	False	True
70445335	Zfp27	ENSMUSG00000062040	6.20649	6.29485	3.4405	3.1471	True	True
68410261	Vill	ENSMUSG00000038775	1.72465	2.61032	na	na	True	False
71493222	4930515G01Rik	na	na	na	0.2697	0.0305	False	False
68845251	4931428F04Rik	ENSMUSG00000014837	2.13313	2.55149	0.0417	0.05705	True	False
70218804	4933427D06Rik	ENSMUSG00000055403	0	0.00621024	7.74525	9.1677	False	True
71211452	LOC546051	na	na	na	3.6966	0.2828	False	True
68845257	A930017N06Rik	ENSMUSG00000048988	3.84051	5.48608	na	na	True	False
69735036	Hist1h1d	ENSMUSG00000052565	0.0900501	0.057309	0.0	0.1171	False	False
69236903	Cacna1f	ENSMUSG00000031142	0.408951	0.283826	2.94655	2.182	True	True
69443280	Rassf8	ENSMUSG00000030259	1.74942	1.63556	6.0506	4.257	True	True
68745438	Mthfr	ENSMUSG00000029009	2.71565	1.91549	25.0225	27.3333	True	True
69735030	Hist1h1c	ENSMUSG00000036181	3.14806	2.77918	na	na	True	False
69236909	Cacna1h	ENSMUSG00000024112	2.26554	3.70787	15.564775	17.7005	True	True
69443082	4932418E24Rik	ENSMUSG00000048038	0.0846421	0.0367608	na	na	False	False
69608414	D0HXS9928E	ENSMUSG00000001962	7.63497	8.46992	11.7382	12.0683	True	True
70793977	Rps6ka3	ENSMUSG00000031309	19.0016	16.0317	0.5039	0.05825	True	False
70793971	TC1412975	na	na	na	0.01	0.184	False	False
70812990	TC1498646	na	na	na	20.49235	20.61705	False	True
69015781	Cdc37l1	ENSMUSG00000024780	35.4119	31.7205	2.1804	2.84035	True	True
71152581	Mm.233524	na	na	na	0.0	0.0	False	False
72471745	Sycp1	ENSMUSG00000027855	0	0	0.0368	0.0	False	False
72471746	6030429G01Rik	ENSMUSG00000055809	0.0303565	0.0279216	0.0	0.01005	False	False
76081013	Pnmt	ENSMUSG00000038216	0.0331669	0	6.2939	5.28305	False	True
965	Stil	ENSMUSG00000028718	0.328162	0.323072	na	na	True	False
71152587	Mm.234723	na	na	na	0.19615	0.2409	False	False
72471743	Angpt4	ENSMUSG00000027460	0.0130949	0.00723261	0.0	0.0	False	False
70305574	C630010N09	na	na	na	na	na	False	False
68523231	Nars2	ENSMUSG00000018995	10.8324	11.0308	1.0729	0.71055	True	True
70302252	Spink2	ENSMUSG00000053030	0	0	33.0776	28.8189	False	True
69445623	8030423F21Rik	na	na	na	3.5658	3.10725	False	True
69734494	Gns	ENSMUSG00000034707	19.4543	20.3449	2.995	1.73195	True	True
239	Cdh6	ENSMUSG00000039385	1.3795	1.09444	na	na	True	False
237	Cdh2	ENSMUSG00000024304	45.9404	53.0884	9.17945	13.43115	True	True
70598370	Zmym4	ENSMUSG00000042446	40.7799	36.7923	8.96075	5.9338	True	True
231	Cdh10	ENSMUSG00000022321	33.6096	30.9779	na	na	True	False
75197570	Zfp369	ENSMUSG00000021514	18.7869	18.6791	5.3381	6.13885	True	True
233	Cdh11	ENSMUSG00000031673	34.777	33.6057	na	na	True	False
74720892	Olfr16	ENSMUSG00000037924	0	0	0.05075	0.0	False	False
71022328	LOC434432	na	na	na	0.0	0.0	False	False
69202812	2610019F03Rik	ENSMUSG00000050052	6.3465	5.33509	5.0691	3.2741	True	True
70305347	A830021M18	na	na	na	0.7305	0.9174	False	False
69202818	Sfrs11	ENSMUSG00000055436	100.417	95.7262	60.1511	55.2991	True	True
73716531	Entpd8	ENSMUSG00000036813	0	0	na	na	False	False
71022322	LOC434427	na	na	na	0.077	0.02025	False	False
79760484	Myl4	ENSMUSG00000061086	0.542361	0.453272	na	na	True	False
70305341	A830008O07Rik	na	na	na	16.8507	22.49785	False	True
69015254	Lman1	ENSMUSG00000041891	13.47	13.8932	2.1721	2.2336	True	True
69113931	AI591476	ENSMUSG00000063568	18.1485	19.8541	na	na	True	False
68745137	Slc33a1	ENSMUSG00000027822	6.42683	6.23687	7.5464	11.4108	True	True
68797888	Hmha1	ENSMUSG00000035697	0.361195	0.415273	1.0119	1.10915	True	True
69113937	4930425N13Rik	ENSMUSG00000049526	0.540221	0.381395	na	na	True	False
70787654	LOC434271	na	na	na	0.0106	0.0	False	False
68798980	Mpp2	ENSMUSG00000017314	22.4152	25.6712	52.998	53.2885	True	True
69134193	Tradd	ENSMUSG00000031887	0.467163	0.472945	30.1846	30.8033	True	True
67979026	Tmem50b	ENSMUSG00000022964	45.8247	41.8485	51.5389795	55.092784	True	True
73653494	Olfr705	ENSMUSG00000095373	0	0	0.09755	0.0449	False	False
69407499	3110070M22Rik	na	na	na	na	na	False	False
71608432	Rab22a	ENSMUSG00000027519	9.62413	9.66127	24.1154	22.6776	True	True
70429327	Nsg1	ENSMUSG00000029126	34.4276	32.1031	61.5424	57.699	True	True
68410500	Uroc1	ENSMUSG00000034456	0	0	na	na	False	False
70787149	LOC433951	na	na	na	na	na	False	False
69817187	Ppfia4	ENSMUSG00000026458	3.05019	3.04759	16.6892	11.2523	True	True
69407493	3110057O12Rik	ENSMUSG00000037818	6.98609	6.7254	59.38805	64.5866	True	True
69170186	Nr1i3	ENSMUSG00000005677	0.264347	0.429721	3.5443	3.7062	True	True
71764476	LOC432762	na	na	na	0.6891	0.08775	False	False
77620798	Senp8	ENSMUSG00000051705	4.71536	4.60517	2.686	2.6347	True	True
69262330	Tmem27	ENSMUSG00000015401	0.0157709	0.0312856	na	na	False	False
71211434	mCG21049.3	na	na	na	0.9264	0.3396	False	False
68162264	Usp46	ENSMUSG00000054814	35.1609	38.7449	na	na	True	False
77620792	Opa1	ENSMUSG00000038084	51.0461	49.0019	60.77515	56.1199	True	True
78633993	Slc39a11	ENSMUSG00000041654	1.3014	1.4788	na	na	True	False
77620790	1500001A10Rik	ENSMUSG00000063919	16.8461	17.2113	na	na	True	False
77620796	2510003E04Rik	ENSMUSG00000036955	71.1488	68.6703	69.39345	66.07605	True	True
77620794	Cyb5r3	ENSMUSG00000018042	16.2267	20.8831	22.08525	28.22575	True	True
70231164	B230380D07Rik	ENSMUSG00000042444	19.3944	19.3954	22.1661	31.7901	True	True
72004494	Znrf4	ENSMUSG00000044526	0	0	na	na	False	False
70723167	Cacna1s	ENSMUSG00000026407	0.111256	0.12827	0.1947	0.072	True	False
70920105	AK220210	ENSMUSG00000074151	0.178514	0.154983	0.24625	0.0176	True	False
70723161	LOC433348	na	na	na	9.28785	0.8794	False	True
70228125	9430022F06Rik	ENSMUSG00000036855	0	0	10.4833	22.5584	False	True
71212500	mCG147019	na	na	na	na	na	False	False
69289267	Kbtbd5	ENSMUSG00000074001	0.340298	0.483267	2.44485	0.97165	True	True
71919164	Tnfrsf13b	ENSMUSG00000010142	0.512636	0.466624	0.5949	1.3246	True	True
70523706	Ndufa9	ENSMUSG00000000399	57.1357	58.9287	50.3871	46.0848	True	True
74359652	LOC380784	na	na	na	0.0	0.2642	False	False
70523705	D13Wsu50e	ENSMUSG00000021598	14.8552	14.1959	31.9068	19.2513	True	True
71789825	Mip	ENSMUSG00000025389	0.0697402	0.000251988	0.9015	1.0561	False	True
69626754	Ddx42	ENSMUSG00000020705	17.0819	18.547	21.41315	14.75125	True	True
2538	Rora	ENSMUSG00000032238	31.1371	21.6466	na	na	True	False
70431367	Hoxa10	ENSMUSG00000000938	0	0	0.1155	0.04965	False	False
74277676	9830169C18Rik	ENSMUSG00000021234	6.90722	7.89207	0.15895	0.0	True	False
70431361	Hn1	ENSMUSG00000020737	10.3876	10.8079	16.45755	15.5237	True	True
69113680	Cox4i2	ENSMUSG00000009876	0.604699	0.62242	0.0	0.0868	True	False
69873923	Slc35f3	ENSMUSG00000057060	6.51643	5.33045	11.986	5.8851	True	True
2532	Rgs4	ENSMUSG00000038530	94.8199	73.6019	na	na	True	False
71281241	1110029E03Rik	ENSMUSG00000028468	10.9717	11.6337	10.8567	5.5837	True	True
76081017	Polq	ENSMUSG00000034206	6.71451	5.96272	11.28095	10.13035	True	True
2536	Rbm38	ENSMUSG00000027510	0.801083	0.515676	18.16755	17.85715	True	True
71281710	Jakmip1	ENSMUSG00000063646	11.7028	12.2013	53.35485	45.55855	True	True
71148052	Mm.127759	na	na	na	1.4176	0.42285	False	True
70300875	Podn	ENSMUSG00000028600	0.904332	1.14092	14.78655	14.15265	True	True
68546374	Lsm14a	ENSMUSG00000066568	23.2963	20.6514	20.4708	19.9586	True	True
71325288	Nr1i2	ENSMUSG00000022809	0.0401796	0.0204452	89.4017	92.43035	False	True
69407272	2810417M05Rik	ENSMUSG00000024245	39.2862	37.0582	na	na	True	False
68631978	Bglap-rs1	ENSMUSG00000074489	3.12846	2.82049	na	na	True	False
75861835	Slamf8	ENSMUSG00000053318	0.0461726	0.069977	6.54245	7.09795	False	True
70227836	5830411J07Rik	na	na	na	72.02475	74.3709	False	True
72471814	Zbtb25	ENSMUSG00000056459	4.93424	5.08956	3.9123	2.53925	True	True
72471815	Gm885	ENSMUSG00000040528	0.361656	0.232187	0.0	0.0	True	False
72471816	Ppm2c	ENSMUSG00000049225	30.1965	25.4454	24.4414	15.84385	True	True
70298507	Gm962	ENSMUSG00000049562	0.614974	0.635945	0.0	0.0	True	False
70918964	TC1557458	na	na	na	0.04795	0.0592	False	False
71456086	LOC384865	na	na	na	19.8647	12.84405	False	True
72471812	Clec5a	ENSMUSG00000029915	0.6141	0.84422	0.0	0.0	True	False
69013648	Zfp313	ENSMUSG00000006418	19.2926	18.6606	9.9079	9.71635	True	True
70813347	TC1534227	na	na	na	63.9125	64.7114	False	True
70565999	Fmo6	ENSMUSG00000095576	0	0	0.1401	0.2277	False	False
75198100	Gstm5	ENSMUSG00000004032	53.6101	54.0835	6.54035	5.5934	True	True
69442398	4930579G24Rik	ENSMUSG00000027811	0.830037	0.857947	25.29045	17.91125	True	True
386020	Ndufa8	ENSMUSG00000026895	24.0059	23.8488	14.044	8.4004	True	True
68301825	Ccnb1	ENSMUSG00000041431	0.0662051	0.052173	na	na	False	False
76081016	Glis1	ENSMUSG00000034762	0.422656	0.178497	14.246	16.2649	True	True
70231224	B930008K04Rik	ENSMUSG00000052676	7.12232	7.61517	0.06755	0.1825	True	False
70723223	LOC433405	na	na	na	0.08025	0.12485	False	False
69734851	Gucy2c	ENSMUSG00000042638	0.0337007	0.050191	0.0	0.0	False	False
74300867	1110037K09RikASTERISK	na	na	na	na	na	False	False
70203652	3110043A19Rik	na	na	na	na	na	False	False
68545360	Car5b	ENSMUSG00000031373	1.28472	1.50348	na	na	True	False
70228382	A330009N23Rik	na	na	na	37.542	21.395	False	True
71656630	Ebi2	ENSMUSG00000051212	1.02876	0.947425	0.0	0.0	True	False
69080513	Ubadc1	ENSMUSG00000036352	10.0793	12.7606	0.07825	0.32615	True	False
68498609	Copb1	ENSMUSG00000030754	17.6906	18.2846	31.3628	27.61045	True	True
75492634	Nov	ENSMUSG00000037362	31.5023	41.8101	na	na	True	False
68342021	Slc25a35	ENSMUSG00000018740	2.58865	2.84171	3.3099	3.6716	True	True
70203658	3110047P20Rik	ENSMUSG00000090061	14.3058	17.1366	9.0446	11.72	True	True
69816589	Hist1h3f	ENSMUSG00000069267	0.027162	0	0.0	0.0097	False	False
69838210	Anapc5	ENSMUSG00000029472	25.1358	27.0508	60.0923	62.3999	True	True
70228388	A330017A19Rik	na	na	na	10.45635	7.90195	False	True
68545300	Krt33a	ENSMUSG00000035592	0	0	na	na	False	False
73949686	A530047K17RikASTERISK	na	na	na	na	na	False	False
938	Sema3a	ENSMUSG00000028883	8.31207	7.98956	0.47945	0.68905	True	False
69526761	Atg16l1	ENSMUSG00000026289	15.2078	12.8496	15.58645	11.38135	True	True
72001982	Slc24a4	ENSMUSG00000041771	2.26856	2.89254	0.7686	0.0049	True	False
69526946	Atp1a4	ENSMUSG00000007107	0.00527386	0	22.88145	23.8597	False	True
933	Atxn1	ENSMUSG00000046876	37.4913	36.5593	na	na	True	False
931	Sbno1	ENSMUSG00000038095	54.8802	53.2229	13.4688	17.1045	True	True
76135656	Trim21	ENSMUSG00000030966	1.35063	1.14276	9.53585	8.40195	True	True
386007	Serpinb1b	ENSMUSG00000051029	0.0813995	0.0735022	0.33895	0.28815	False	False
936	Scg2	ENSMUSG00000050711	22.4031	25.9249	na	na	True	False
71891575	Krtap5-2	na	na	na	na	na	False	False
69173280	Gpc3	ENSMUSG00000055653	1.18917	2.19295	3.1704	10.143	True	True
75986090	Lrrc19	ENSMUSG00000049799	0.484675	0.447688	2.6297	2.3472	True	True
69447870	Tnfaip8l3	ENSMUSG00000074345	70.1336	76.9331	na	na	True	False
69447876	9930104L06Rik	na	na	na	0.2326	0.2627	False	False
71325468	Six2	ENSMUSG00000024134	0.402177	0.434029	83.6802	81.9224	True	True
71617020	Qprt	ENSMUSG00000030674	0.205533	0.125786	0.44315	1.23595	True	True
69201702	2010001K21Rik	na	na	na	na	na	False	False
71325462	Sim2	ENSMUSG00000062713	0.0130096	0.0394097	41.91815	45.68805	False	True
68445065	Ick	ENSMUSG00000009828	9.08089	7.36326	67.5257	76.9682	True	True
70723595	Pcdhb7	ENSMUSG00000045062	2.60166	2.49611	1.2428	1.1152	True	True
68667025	Tdh	ENSMUSG00000021953	0.0229927	0.0623167	na	na	False	False
68160847	S100a14	ENSMUSG00000042306	0	0.0182319	0.5462	0.07465	False	False
71232581	Rreb1	ENSMUSG00000039087	3.31866	6.06974	7.1474	19.6599	True	True
75931527	Usp37	ENSMUSG00000033364	6.15393	6.2095	12.3845	11.31965	True	True
76081014	LOC240871	na	na	na	na	na	False	False
71808802	1700019P01Rik	ENSMUSG00000022388	0.258341	0.12714	0.2896	0.18145	True	False
75197648	Gimap8	ENSMUSG00000064262	0.136199	0.0986453	8.29845	7.64785	True	True
72283695	Ltb	ENSMUSG00000024399	0.0208858	0	46.4945	25.33585	False	True
1829	Runx1	ENSMUSG00000022952	0.369239	0.398023	na	na	True	False
73716782	G830039O19RikASTERISK	na	na	na	na	na	False	False
79632284	Tspo	ENSMUSG00000041736	0.626967	0.922601	255.0	255.0	True	True
71808808	4931406B18Rik	ENSMUSG00000013353	0	0.00802043	na	na	False	False
74514180	LOC432973	na	na	na	0.00785	0.0346	False	False
686195	Pes1	ENSMUSG00000020430	2.57608	2.78013	na	na	True	False
69028456	Kcnk5	ENSMUSG00000023243	0.124331	0.135151	0.0822	0.0	True	False
68301413	Gnmt	ENSMUSG00000002769	0.159446	0.229715	na	na	True	False
69672294	Fbln5	ENSMUSG00000021186	0.672867	0.688826	0.12955	0.04025	True	False
69028450	Nfkbiz	ENSMUSG00000035356	1.99558	1.77166	1.1282	0.1038	True	True
68545977	6330530A05Rik	ENSMUSG00000050854	1.24874	0.753576	na	na	True	False
70276897	Gluld1	ENSMUSG00000050217	0	0	na	na	False	False
70276891	Gykl1	ENSMUSG00000053624	0	0	0.1016	0.0	False	False
70918898	Vdac1	ENSMUSG00000020402	104.687	96.9226	79.4868	86.507	True	True
68445107	3110001A13Rik	ENSMUSG00000026655	4.82796	5.95293	na	na	True	False
69257719	Grik2	ENSMUSG00000056073	19.8354	21.5409	29.53195	42.1678	True	True
686198	Nab1	ENSMUSG00000002881	9.85013	9.61002	na	na	True	False
70565452	Rft1	ENSMUSG00000052395	3.51938	3.24633	0.5626	0.2637	True	False
1751	Ikbkb	ENSMUSG00000031537	21.0588	19.3219	na	na	True	False
77620443	Ube2j2	ENSMUSG00000023286	7.34349	7.76239	35.977	32.87565	True	True
2672	Thpo	ENSMUSG00000022847	3.7695	4.52271	na	na	True	False
68798561	Fgf8	ENSMUSG00000025219	0	0	0.8181	0.5446	False	False
69258005	Kcna7	ENSMUSG00000038201	0.012944	0.00430915	0.0485	0.1737	False	False
69257713	Grid2	ENSMUSG00000071424	4.15432	4.53428	0.995	2.2099	True	True
1827	Rtn4rl1	ENSMUSG00000045287	6.34543	8.53237	na	na	True	False
69782587	Osmr	ENSMUSG00000022146	1.05627	0.944017	0.0722	0.2188	True	False
77455032	Nr1h4	ENSMUSG00000047638	0.0669545	0.0771715	1.6235	2.8868	False	True
70610378	3830431G21Rik	ENSMUSG00000066438	0.269173	0.104662	0.13625	0.07315	True	False
70610379	4632411B12Rik	ENSMUSG00000010453	7.42463	8.38076	19.6015	20.9334	True	True
2451	Omg	ENSMUSG00000049612	90.6259	86.025	56.088	54.4203	True	True
545090	Dctn2	ENSMUSG00000025410	23.6354	22.3199	75.0254	87.2275	True	True
69201564	Man2a1	ENSMUSG00000024085	17.7283	14.0082	12.0456	3.00845	True	True
70610376	Insc	ENSMUSG00000048782	1.60919	0.642311	0.22655	0.0416	True	False
70813089	TC1508955	na	na	na	na	na	False	False
69887463	Sumo1	ENSMUSG00000026021	41.1615	38.7056	34.033	31.26025	True	True
69116554	Penk1	ENSMUSG00000045573	1.80015	3.19136	na	na	True	False
71021009	C330049O21Rik	na	na	na	na	na	False	False
74580954	E130102H24Rik	na	na	na	7.23015	2.4499	False	True
545092	Cdk7	ENSMUSG00000069089	10.0787	9.78142	54.0888	60.7478	True	True
68522466	Chst1	ENSMUSG00000027221	17.198	18.3263	79.35465	86.6837	True	True
79632286	Smarca2	ENSMUSG00000024921	281.833	368.814	46.291575	52.64975	True	True
68151347	Xpo7	ENSMUSG00000022100	6.93373	7.0083	27.788	39.7905	True	True
68301419	Gsta3	ENSMUSG00000025934	1.17385	1.02846	na	na	True	False
71021007	A930025A13Rik	na	na	na	0.2741	0.0	False	False
71021006	A930005I04Rik	ENSMUSG00000051246	0.630571	0.751124	0.5788	0.1759	True	False
68546542	Inhbc	ENSMUSG00000025405	0.0238234	0.0295713	na	na	False	False
70201397	1700029P11Rik	ENSMUSG00000061633	0	0	2.99725	2.5049	False	True
73606642	AI317237	ENSMUSG00000023026	27.4008	25.7142	36.7994	31.74595	True	True
71587733	Glis3	ENSMUSG00000052942	0.717135	0.971794	0.3273	0.4262	True	False
71991816	2310051M13Rik	ENSMUSG00000056728	0	0	0.0	0.19015	False	False
68844289	Rab35	ENSMUSG00000029518	7.39794	7.37649	0.4509	0.9682	True	False
75197606	Cpa6	ENSMUSG00000042501	2.24466	3.06792	2.7334	2.1037	True	True
75197600	9230002F21Rik	ENSMUSG00000027468	0	0	3.5702	4.6432	False	True
71991810	Il1f8	ENSMUSG00000026985	0	0	0.0867	0.0	False	False
68924817	BC046331	ENSMUSG00000039523	6.78961	6.61219	1.0938	0.5641	True	True
71213819	Rragb	ENSMUSG00000041658	13.1676	15.1269	6.9347	5.37425	True	True
75750321	Rbm21	ENSMUSG00000071645	2.34797	2.51128	32.1011	31.5762	True	True
2412	Mtpn	ENSMUSG00000029840	138.571	129.561	75.61415	77.93385	True	True
68191126	Mansc1	ENSMUSG00000032718	7.36199	6.24998	na	na	True	False
71891557	4921504E06Rik	ENSMUSG00000026734	0.00941319	0	0.06345	0.0	False	False
81654143	Wnt2	ENSMUSG00000010797	0.31321	0.925816	3.40495	4.87675	True	True
69116437	D1Bwg0212e	ENSMUSG00000003135	9.12937	8.80187	3.55865	5.54185	True	True
76080954	Lrrn6d	ENSMUSG00000044505	0.184108	0.292527	10.0851	9.7417	True	True
71213812	Krt77	ENSMUSG00000067594	0.697737	1.29275	16.8409	12.47865	True	True
75457611	Cst3	ENSMUSG00000027447	414.079	437.718	na	na	True	False
75457610	Cst3	ENSMUSG00000027447	414.079	437.718	na	na	True	False
71378075	2010007L08Rik	na	na	na	0.2701	0.3561	False	False
75457612	Cst3	ENSMUSG00000027447	414.079	437.718	na	na	True	False
68667793	Rpp38	ENSMUSG00000049950	5.26173	6.74132	na	na	True	False
69290423	Rhobtb1	ENSMUSG00000019944	1.40928	1.35435	8.1604	4.05	True	True
2453	Optn	ENSMUSG00000026672	5.75231	5.84699	na	na	True	False
70474809	Chmp2b	ENSMUSG00000004843	19.5606	18.6947	0.76325	0.42095	True	False
69290567	Taf3	ENSMUSG00000025782	8.4668	8.58847	na	na	True	False
70724798	H2-M10.4	ENSMUSG00000048231	0	0	0.0	0.0	False	False
71380447	Zfp248	ENSMUSG00000030145	10.2684	8.96693	0.58155	0.12895	True	False
74736462	LOC546335	ENSMUSG00000079521	0	0	0.0	0.06015	False	False
67978711	Gps1	ENSMUSG00000025156	2.7635	3.4094	na	na	True	False
74735074	Scn1a	ENSMUSG00000064329	73.3317	57.1978	3.81275	0.9048	True	True
2416	Myc	ENSMUSG00000022346	2.93642	3.04924	na	na	True	False
1137	Zfp161	ENSMUSG00000049672	5.13331	5.04068	na	na	True	False
73497744	Mpped2	ENSMUSG00000016386	16.7549	15.2143	1.7823	6.2068	True	True
2716	Vil2	ENSMUSG00000052397	7.78669	7.13494	na	na	True	False
70919298	Mrpl48	ENSMUSG00000030706	9.37817	9.56863	1.52345	0.3455	True	True
73424190	Rnf20	ENSMUSG00000028309	38.2798	38.6691	0.4448	0.25415	True	False
73424196	Rod1	ENSMUSG00000028382	14.1127	12.9509	0.7696	0.0	True	False
74724223	Olfr592	ENSMUSG00000073956	0	0	0.0189	0.0	False	False
69672605	Fst	ENSMUSG00000021765	0.0295942	0.136094	0.7628	0.6659	True	False
69980358	Tiaf2	na	na	na	4.0838	5.7322	False	True
1178	Col6a2	ENSMUSG00000020241	1.51236	1.91944	na	na	True	False
69818096	Rfc5	ENSMUSG00000029363	3.29083	3.59347	10.16755	7.1111	True	True
74724229	Olfr598	ENSMUSG00000073951	0	0	0.0	0.10525	False	False
70918784	Abhd8	ENSMUSG00000007950	15.6752	14.6056	9.9372	9.6726	True	True
70528264	Atp5b	ENSMUSG00000025393	2822.96	2858.61	116.4472	122.2448	True	True
70543063	Lzp-s	ENSMUSG00000069515	0.0154111	0.0141804	0.8522	0.6014	False	False
70543062	Ckmt2	ENSMUSG00000021622	0.0760456	0.0475082	0.0904	0.0	False	False
73423693	Fabp1	ENSMUSG00000054422	0	0	0.1041	0.0673	False	False
69443112	Hexim2	ENSMUSG00000043372	2.49263	2.4835	8.99045	6.1652	True	True
68924602	2310057J16Rik	ENSMUSG00000044433	3.16458	3.55255	na	na	True	False
79762328	Cntn3	ENSMUSG00000030075	9.66001	10.622	na	na	True	False
70724792	H2-M10.1	ENSMUSG00000024448	0	0	0.0926	0.0022	False	False
69549625	Acad11	ENSMUSG00000090150	5.46738	5.12243	1.1748	0.78685	True	True
69549624	Eif2s3y	ENSMUSG00000069049	41.2204	41.4454	31.64795	36.56345	True	True
69443118	4933403G14Rik	ENSMUSG00000050930	0.838452	0.87698	na	na	True	False
69549622	Ate1	ENSMUSG00000030850	27.8686	27.781	26.324	35.65915	True	True
74580859	Slc26a3	ENSMUSG00000001225	0.0085625	0.00403008	0.0	0.0	False	False
68157416	Rnf144	ENSMUSG00000020642	5.12412	5.2752	na	na	True	False
69013572	Clstn3	ENSMUSG00000008153	23.0645	21.4461	82.4343	79.629	True	True
77923596	Arhgap12	ENSMUSG00000041225	25.2066	25.7788	4.3731	2.2464	True	True
68157415	Psmd2	ENSMUSG00000006998	17.8494	18.3209	46.9873	47.5558	True	True
69514636	Abi2	ENSMUSG00000026782	63.5084	67.8004	30.61165	28.33415	True	True
68157413	Atp1a1	ENSMUSG00000033161	74.5916	69.3292	68.93625	76.9674	True	True
68157410	D4Bwg0951e	ENSMUSG00000048706	6.11183	4.15209	16.3096	4.97825	True	True
68157411	1500031L02Rik	ENSMUSG00000035790	19.4083	19.0569	15.90455	13.4836	True	True
73496923	Kcnk7	ENSMUSG00000024936	0.0119383	0.0176573	0.0	0.0	False	False
69013579	Epb4.1l2	ENSMUSG00000019978	18.3812	17.9749	4.4377	4.0932	True	True
68632948	BC022224	ENSMUSG00000034449	0.86777	0.892391	4.4087	5.7129	True	True
68157418	AI790298	ENSMUSG00000097064	0	0	na	na	False	False
68157419	Tardbp	ENSMUSG00000041459	46.3712	47.1025	30.2243	26.3988	True	True
69012956	AV249152	ENSMUSG00000020319	3.80834	3.81591	0.0	0.05095	True	False
71992025	Endog	ENSMUSG00000015337	1.16372	1.06787	0.0	0.0	True	False
68321976	Abhd1	na	na	na	na	na	False	False
71210895	Exph5	ENSMUSG00000034584	3.41831	1.59277	na	na	True	False
68744863	2410018G20Rik	ENSMUSG00000022671	6.04673	6.11503	15.7463	23.5025	True	True
70545931	Ggta1	ENSMUSG00000035778	1.16494	1.69097	0.2362	0.0	True	False
68744648	Rpl36a	na	na	na	na	na	False	False
74743441	Prmt8	ENSMUSG00000030350	18.4877	18.1144	16.9503	20.2591	True	True
68744869	1100001I22Rik	na	na	na	13.3895	15.9102	False	True
70218637	Calr4	ENSMUSG00000028558	0.247922	0.329205	2.3036	0.7095	True	True
75694415	Cyp27a1	ENSMUSG00000026170	0.607977	0.546441	na	na	True	False
74359640	5430433J05RikASTERISK	na	na	na	na	na	False	False
69873475	Sdk2	ENSMUSG00000041592	4.69361	6.11321	20.8655	21.9516	True	True
70218324	4930546C10Rik	na	na	na	0.00855	0.0885	False	False
545107	2310057D15Rik	ENSMUSG00000029326	16.8196	16.803	26.4703	22.52755	True	True
75988359	Cd3e	ENSMUSG00000032093	0.0595056	0.109061	5.9129	5.8518	True	True
74359646	Cdh19	ENSMUSG00000047216	2.0106	1.43013	0.0	0.0123	True	False
70300025	Gm1140	ENSMUSG00000079577	0	0	0.0	0.1426	False	False
69818090	Rev3l	ENSMUSG00000019841	20.0719	20.9161	1.9292	2.58545	True	True
68798424	Podnl1	ENSMUSG00000012889	0.0584924	0.0543873	1.1149	0.1246	False	True
69735628	Itgb3	ENSMUSG00000020689	0.33986	0.24702	1.05055	2.26855	True	True
545108	Abcd2	ENSMUSG00000055782	7.75053	5.47177	0.5196	0.7615	True	False
1535	Sprr1a	ENSMUSG00000050359	0.0195214	0	na	na	False	False
69885600	Sntg2	ENSMUSG00000020672	0.54803	0.603146	0.36555	0.27785	True	False
67978685	Mkrn1	ENSMUSG00000029922	35.2001	32.6269	na	na	True	False
67978684	Ddah2	ENSMUSG00000007039	3.31493	2.91774	7.0419	5.438	True	True
79544818	Tmed1	ENSMUSG00000032180	1.15295	1.48273	2.7939	2.1929	True	True
69549194	Tomm40	ENSMUSG00000002984	9.90564	9.50901	na	na	True	False
69837447	Thbs3	ENSMUSG00000028047	3.30098	5.19581	na	na	True	False
68196926	Cntnap4	ENSMUSG00000031772	10.1119	12.2193	16.384	30.3243	True	True
69549191	Nkd1	ENSMUSG00000031661	0.800296	0.875553	na	na	True	False
69549190	Nola3	ENSMUSG00000027133	13.8434	13.6773	0.0	0.0	True	False
73653428	Olfr429	ENSMUSG00000049528	0	0	0.15985	0.10685	False	False
70528623	Lrrc33	ENSMUSG00000052384	1.4634	1.46116	0.0	0.0	True	False
69288650	Atf4	ENSMUSG00000042406	42.3404	40.7412	47.74975	43.4957	True	True
74357827	1700026D02RikASTERISK	na	na	na	na	na	False	False
77620445	Lrriq2	ENSMUSG00000022604	4.01947	3.16169	1.0933	0.69555	True	True
71764775	Fes	ENSMUSG00000053158	0.145965	0.168945	0.84015	0.34195	True	False
69626933	Dnahc11	ENSMUSG00000018581	0.125104	0.0200024	0.6664	0.16135	True	False
69288656	Atf6	ENSMUSG00000026663	12.9273	12.1811	8.2388	9.7441	True	True
74357821	1700018A14RikASTERISK	na	na	na	na	na	False	False
69114153	BC055111	ENSMUSG00000054362	0.231749	0.07022	na	na	True	False
71492892	AI846148	ENSMUSG00000024970	2.40397	2.52581	0.35555	0.50935	True	False
71232927	Lama3	ENSMUSG00000024421	1.5423	1.58069	na	na	True	False
70919788	6030458H05	ENSMUSG00000019731	9.13256	8.74254	0.0	0.0	True	False
71492898	1700113I22Rik	ENSMUSG00000097487	1.20153	0.639192	1.74475	1.47555	True	True
70919782	2310044G17Rik	ENSMUSG00000034157	24.4797	24.5522	2.118	1.03565	True	True
77791968	BC030477	ENSMUSG00000020811	6.9688	6.63129	32.7565776	25.6074127	True	True
71656134	Slc7a3	ENSMUSG00000031297	3.85698	5.99039	0.5947	1.2624	True	True
1285	Sox5	ENSMUSG00000041540	20.734	17.8373	na	na	True	False
80525751	Vac14	ENSMUSG00000010936	7.65154	8.72641	2.608	2.2039	True	True
74265345	8430407H02RikASTERISK	na	na	na	na	na	False	False
69863248	Ptafr	ENSMUSG00000056529	0.460013	0.440612	5.92875	4.223	True	True
71160988	Mm.336576	na	na	na	na	na	False	False
74277651	Rif1	ENSMUSG00000036202	10.3464	9.7116	0.23185	0.0	True	False
74277652	Fcgr1	ENSMUSG00000015947	0.495493	0.429967	36.5073	31.4263	True	True
74277653	9330133O14Rik	na	na	na	21.1072	18.5451	False	True
68845394	Slc43a2	ENSMUSG00000038178	13.2202	12.15	9.9063	14.7149	True	True
68301622	Mkln1	ENSMUSG00000025609	62.1672	56.4102	na	na	True	False
73811567	B130031C01RikASTERISK	na	na	na	na	na	False	False
69104156	Tspyl3	ENSMUSG00000074671	8.41648	9.31241	8.3046	9.4354	True	True
71891826	4930511N19Rik	na	na	na	0.0	0.0	False	False
74359395	2410170E07RikASTERISK	na	na	na	na	na	False	False
71891820	4930519H02Rik	na	na	na	0.0	0.0	False	False
73811561	A830054H12RikASTERISK	na	na	na	na	na	False	False
73716704	G370142A02RikASTERISK	na	na	na	na	na	False	False
69288387	Trpc1	ENSMUSG00000032839	13.8253	12.7284	36.99765	34.03615	True	True
68191246	Zfp653	ENSMUSG00000038895	2.14363	2.2625	3.96225	2.9866	True	True
79904776	Klk1b9	ENSMUSG00000059042	0	0	1.4051	1.8781	False	True
634449	Psmb3	ENSMUSG00000069744	4.74065	4.72396	22.6434	11.24345	True	True
71283483	Zfp777	ENSMUSG00000071477	1.54546	1.49034	4.22435	2.96615	True	True
69854587	2510048L02Rik	ENSMUSG00000006241	0.824078	1.35959	na	na	True	False
69735180	Htra3	ENSMUSG00000029096	1.00843	1.05261	4.45905	1.51075	True	True
70565518	E130311K13Rik	ENSMUSG00000048581	5.73652	6.27103	7.3679	4.6484	True	True
75694246	Capsl	ENSMUSG00000039676	2.00678	5.08031	1.9761	2.1269	True	True
73808414	D530031E19RikASTERISK	na	na	na	na	na	False	False
69672641	Fut4	ENSMUSG00000049307	0.0269661	0.0338831	0.5987	0.0499	False	False
74277400	Olfr985	ENSMUSG00000049073	0	0	0.0	0.0	False	False
71764553	Mark4	ENSMUSG00000030397	6.62467	6.27174	8.6443	5.3185	True	True
69114486	1700029F12Rik	ENSMUSG00000052075	0	0	0.0	0.0	False	False
74430960	LOC381070	ENSMUSG00000067882	0.215989	0.164739	0.044	0.0	True	False
75931440	Pparbp	ENSMUSG00000018160	24.7796	26.2752	8.38975	8.293	True	True
71161477	Mm.29723	na	na	na	0.0	0.0	False	False
71570737	Mtap1b	ENSMUSG00000052727	371.84	349.926	107.65455	105.0979	True	True
73767400	F530213H18RikASTERISK	na	na	na	na	na	False	False
68799113	Mthfsd	ENSMUSG00000031816	4.26957	5.47385	48.7721	33.8715	True	True
71020895	Stx11	ENSMUSG00000039232	0.0347289	0.079278	1.4884	1.1777	False	True
75991022	Krt17	ENSMUSG00000035557	0	0.0204895	2.35905	3.3904	False	True
73767406	F530002G13RikASTERISK	na	na	na	na	na	False	False
68443080	Bckdha	ENSMUSG00000060376	1.37458	1.26836	0.2283	0.11505	True	False
71609032	Purb	ENSMUSG00000094483	107.615	101.437	50.0575	41.52315	True	True
74743378	Sprr2h	ENSMUSG00000046259	0	0	0.0	0.2778	False	False
74431077	Mm.435	na	na	na	0.0182	0.3803	False	False
69817217	Ppp1r2	ENSMUSG00000047714	15.538	13.4039	5.5993	2.8057	True	True
74736177	LOC432545	na	na	na	0.0	0.0	False	False
73423793	Mgl2	ENSMUSG00000040950	0.161748	0.123301	na	na	True	False
69885606	Snx1	ENSMUSG00000032382	18.5634	18.4553	22.67485	26.292	True	True
69289010	Ankrd52	ENSMUSG00000014498	11.2154	10.9441	20.5116	17.5446	True	True
69528993	BC023829	ENSMUSG00000073139	18.5999	19.9904	12.06185	11.544	True	True
75692715	G430002G23Rik	ENSMUSG00000024937	1.7965	2.54828	na	na	True	False
69838607	Giyd2	ENSMUSG00000059772	1.79183	1.99841	16.5107	13.1369	True	True
70194510	Ube2g1	ENSMUSG00000020794	15.9725	13.5564	14.0406	10.0285	True	True
71832812	LOC433479	na	na	na	3.1506	2.4583	False	True
76003343	Unc45b	ENSMUSG00000018845	0.147325	0.139425	5.00945	5.3637	True	True
69981019	Tlk2	ENSMUSG00000020694	35.9306	36.4514	0.63155	0.1176	True	False
69837546	Vezt	ENSMUSG00000036099	33.3294	33.8496	21.26585	12.5768	True	True
71212229	Zfyve26	ENSMUSG00000066440	1.96306	1.92559	0.0	0.2342	True	False
1825	Rho	ENSMUSG00000030324	0.0573812	0.0505566	na	na	False	False
71608294	Gtpbp9	ENSMUSG00000027108	85.082	79.3716	68.8335	63.81245	True	True
73949514	9930117J11RikASTERISK	na	na	na	na	na	False	False
69290435	Sall2	ENSMUSG00000049532	4.28039	4.84963	0.4299	1.1494	True	True
71213262	mCG22988.1	na	na	na	3.7092	1.26655	False	True
74720735	Olfr1344	ENSMUSG00000090824	0.0689246	0.0244313	0.11075	0.0	False	False
71210846	Prx	ENSMUSG00000053198	0.0771584	0.0845061	0.549	0.4116	False	False
69549662	Stoml1	ENSMUSG00000032333	6.08993	5.63668	27.0768	18.4402	True	True
70295954	Gm177	na	na	na	0.0	0.0	False	False
2616	Slc35c2	ENSMUSG00000017664	5.76759	5.38728	11.5082	14.0026	True	True
70593394	Tbx19	ENSMUSG00000026572	0.00684259	0	0.3823	0.14815	False	False
71213268	LOC544922	ENSMUSG00000054931	1.42903	1.44481	0.618	1.0553	True	True
69734530	Gpatc2	ENSMUSG00000039210	6.71251	6.05942	0.0	0.0	True	False
69262338	Spcs1	ENSMUSG00000021917	26.7846	29.0058	24.4939	22.4722	True	True
70608541	LOC432463	na	na	na	0.0	0.06165	False	False
71808655	C78409	ENSMUSG00000040441	0.316949	0.178619	0.2443	0.5334	True	False
70608547	Hnrph3	ENSMUSG00000020069	55.9681	56.8774	0.55805	0.19445	True	False
70200812	Zyx	ENSMUSG00000029860	8.32003	7.54109	23.90155	21.79135	True	True
69734536	Gpc1	ENSMUSG00000034220	4.50934	3.86847	15.5203	12.7893	True	True
68637772	Zfyve19	ENSMUSG00000068580	8.40694	7.42892	na	na	True	False
689	Ndn	ENSMUSG00000033585	50.3685	65.5649	47.9885	73.4621	True	True
68300908	Tegt	ENSMUSG00000023010	65.2369	68.9406	9.2151	14.9913	True	True
79544848	Sema3b	ENSMUSG00000057969	0.40093	0.468636	2.8797	3.0079	True	True
70200818	Zzef1	ENSMUSG00000055670	12.8528	12.375	8.9851	7.7432	True	True
69257660	Gpr87	ENSMUSG00000051431	0.973724	0.52965	na	na	True	False
1073	Trim28	ENSMUSG00000005566	40.7917	43.7897	na	na	True	False
77620367	Gbp2	ENSMUSG00000028270	1.04119	0.792782	0.25015	0.334375	True	False
70609147	1700007K09Rik	ENSMUSG00000030858	0	0	0.5346	0.1336	False	False
177149	Ereg	ENSMUSG00000029377	0	0	20.4151	23.9205	False	True
70593390	Sp1	ENSMUSG00000001280	7.58284	7.62318	0.01705	0.0	True	False
68798603	Rpain	ENSMUSG00000018449	8.01687	9.71454	0.6728	0.4244	True	False
69838605	Nubp1	ENSMUSG00000022503	2.11546	1.79733	10.05405	7.4498	True	True
69013528	Pik3cg	ENSMUSG00000020573	0.873006	0.901485	0.3521	0.2184	True	False
70609149	1700013F07Rik	ENSMUSG00000027886	0.698003	0.902231	0.2968	0.006	True	False
70609148	Ankrd48	ENSMUSG00000020481	0	0	0.1544	0.2302	False	False
679	Mtif2	ENSMUSG00000020459	22.9891	20.15	na	na	True	False
74300813	E430033I06RikASTERISK	na	na	na	na	na	False	False
685	Ncdn	ENSMUSG00000028833	69.9722	69.5345	65.5979	62.23025	True	True
68342234	Dera	ENSMUSG00000030225	0.761519	0.82515	na	na	True	False
71616334	Trabd	ENSMUSG00000015363	1.57334	1.45966	8.1919	8.94045	True	True
69444723	Smarcc2	ENSMUSG00000025369	43.7125	45.1188	na	na	True	False
69113919	Trim17	ENSMUSG00000036964	2.66151	2.56127	0.0926	0.0	True	False
74300819	6430706K06RikASTERISK	na	na	na	na	na	False	False
68545009	Plac9	na	na	na	30.52495	25.14835	False	True
69863249	Ptgir	ENSMUSG00000043017	0.0163037	0.0159539	3.1921	2.78205	False	True
69444729	5930416I19Rik	na	na	na	na	na	False	False
[truncated: 41,460 more rows]
