# Supplementary material for: Laminar and Dorsoventral Molecular Organization of the Medial Entorhinal Cortex Revealed by Large-scale Anatomical Analysis of Gene Expression
Source: PLoS Comput Biol. 2015 Jan 23;11(1):e1004032. doi: 10.1371/journal.pcbi.1004032 (PMC4304787; doi:10.1371/journal.pcbi.1004032)
Supplement: S3 Dataset — (XLS) [file pcbi.1004032.s010.xls]

## Sheet: README
Fig 3 Border Genes
Data shown include the minimum mean pixel intensity and difference in mean pixel intensity across the border
For the dborderd group, genes were identified using the ABA differential tool and therefore a fold difference is not shown

## Sheet: dECborderd
Symbol	Iseries	Name	Entrez	Minimum Exp	Diff Exp
Cck	201	cholecystokinin	12424	ABA	-
Mrg1	1232	myeloid ecotropic viral integration site-related gene 1	17536	ABA	-
Igfbp6	67978758	insulin-like growth factor binding protein 6	16012	ABA	-
Wfs1	68924527	Wolfram syndrome 1 homolog (human)	22393	ABA	-
Gucy1a3	77454950	guanylate cyclase 1, soluble, alpha 3	60596	ABA	-
Gpr88	79677355	G-protein coupled receptor 88	64378	ABA	-
Nudt4	68637449	nudix (nucleoside diphosphate linked moiety X)-type motif 4	71207	ABA	-
Slc30a3	69873899	solute carrier family 30 (zinc transporter), member 3	22784	ABA	-
Grp	79913274	gastrin releasing peptide	225642	7	24.094

## Sheet: dECborderv
Symbol	Iseries	Name	Entrez	Minimum Exp	Diff Exp
Llgl1	646	lethal giant larvae homolog 1 (Drosophila)	16897	6	19.6075
Nrip1	740	nuclear receptor interacting protein 1	268903	11	29.8589
Wdr18	1552	WD repeat domain 18	216156	2	25.6609
1110067D22Rik	532758	RIKEN cDNA 1110067D22 gene	216551	9	18.7591
Fabp5	631728	fatty acid binding protein 5, epidermal	16592	4	17.7231
Fkbp3	632493	FK506 binding protein 3	30795	5	15.7914
Wbp11	641536	WW domain binding protein 11	60321	9	26.5076
Nrd1	67765720	nardilysin, N-arginine dibasic convertase, NRD convertase 1	230598	10	22.3127
Ecsit	67767444	ECSIT homolog (Drosophila)	26940	14	18.5677
Psmb4	68196974	proteasome (prosome, macropain) subunit, beta type 4	19172	11	30.1291
Gnb1	68203457	guanine nucleotide binding protein, beta 1	14688	8	33.4376
Ube4a	68203459	ubiquitination factor E4A, UFD2 homolog (S. cerevisiae)	140630	5	25.7742
Psmd6	68269288	proteasome (prosome, macropain) 26S subunit, non-ATPase, 6	66413	11	15.0946
Mrps12	68301365	mitochondrial ribosomal protein S12	24030	5	17.4852
Mrpl45	68341782	mitochondrial ribosomal protein L45	67036	11	23.526
Gclc	68410303	glutamate-cysteine ligase, catalytic subunit	14629	11	25.4998
Vps26a	68442901	vacuolar protein sorting 26 homolog A (yeast)	30930	13	21.5105
Plcl2	68445889	phospholipase C-like 2	224860	9	16.6423
Fstl1	68633050	follistatin-like 1	14314	7	22.4237
Eif3s9	68637856	eukaryotic translation initiation factor 3, subunit 9 (eta)	27979	6	16.3831
Gcn5l2	68798262	GCN5 general control of amino acid synthesis-like 2 (yeast)	14534	6	18.329
Acss2	69013516	acyl-CoA synthetase short-chain family member 2	60525	1	15.1663
Plxdc2	69028396	plexin domain containing 2	67448	6	15.4315
0710005M24Rik	69113638	RIKEN cDNA 0710005M24 gene	76897	6	19.109
Ints3	69134568	integrator complex subunit 3	229543	4	26.3483
D10Ertd322e	69173343	DNA segment, Chr 10, ERATO Doi 322, expressed	67270	3	21.2398
4933409K07Rik	69443148	RIKEN cDNA 4933409K07 gene	108816	0	15.0081
9330159F19Rik	69446661	RIKEN cDNA 9330159F19 gene	212448	6	23.7722
Tbc1d24	69531049	TBC1 domain family, member 24	224617	2	16.8319
Usp14	69549326	ubiquitin specific peptidase 14	59025	12	23.4582
Grb14	69816577	growth factor receptor bound protein 14	50915	12	16.9395
8030451F13Rik	69835645	RIKEN cDNA 8030451F13 gene	109272	1	23.6675
Tiam2	69980364	T-cell lymphoma invasion and metastasis 2	24001	5	31.5208
Il1rapl1	70278045	interleukin 1 receptor accessory protein-like 1	331461	5	15.7654
LOC433731	70300186	gene model 427, (NCBI)	433731	6	21.549
Ust	70302956	uronyl-2-sulfotransferase	338362	0	23.6627
A930012M17	70305371	hypothetical protein A930012M17	268777	6	19.8088
Emb	70429238	embigin	13723	8	53.2741
Gatad1	70546311	GATA zinc finger domain containing 1	67210	11	16.4399
Cacng3	70723369	calcium channel, voltage-dependent, gamma subunit 3	54376	3	27.735
LOC433697	70786667	hypothetical gene supported by AK048701	433697	2	17.0839
TC1498646	70812990	TIGR MGI TC1498646	0	7	15.7018
Grin2a	71307394	glutamate receptor, ionotropic, NMDA2A (epsilon 1)	14811	9	23.3987
Wdr16	71377947	WD repeat domain 16	71860	5	18.3056
Ptprk	71378456	protein tyrosine phosphatase, receptor type, K	19272	7	45.9463
Magi1	71574497	membrane associated guanylate kinase, WW and PDZ domain containing 1	14924	13	19.877
Polr1e	71608283	polymerase (RNA) I polypeptide E	64424	9	16.0507
Gpr12	71656914	G-protein coupled receptor 12	14738	0	22.9938
2310046A06Rik	71991822	RIKEN cDNA 2310046A06 gene	69642	5	15.4592
Gucy1a2	74431661	guanylate cyclase 1, soluble, alpha 2	234889	1	15.6217
TC1563501	74562606	TIGR MGI TC1563501	0	0	15.1758
Ssbp3	74635614	single-stranded DNA binding protein 3	72475	10	17.9637
LOC545070	74736408	-	545070	1	17.9584
Cldn1	75695650	claudin 1	12737	9	21.0514
Fgfr1	79750677	fibroblast growth factor receptor 1	14182	9	20.2904

## Sheet: vmECborderd
Symbol	Iseries	Name	Entrez	Minimum Exp	Diff Exp
Cntnap4	68196926	contactin associated protein 4	170571	10	19.4172
Calb2	69117422	calbindin 2	12308	3	21.8992
Cutl2	70593288	cut-like 2 (Drosophila)	13048	8	37.6939
Nef3	69782174	neurofilament 3, medium	18040	6	16.1384
Sorbs1	69169391	sorbin and SH3 domain containing 1	20411	9	25.0889
Igsf9b	74431071	immunoglobulin superfamily, member 9B	235086	11	23.8158
1700024P16Rik	74581199	RIKEN cDNA 1700024P16 gene	242594	1	19.6916
Col5a1	74821660	procollagen, type V, alpha 1	12831	1	33.1488
Epha4	79913272	Eph receptor A4	13838	8	24.9168
Calb2	69117422	calbindin 2	12308	3	21.8992

## Sheet: vmECborderv
Symbol	Iseries	Name	Entrez	Minimum Exp	Diff Exp
Agt	88	angiotensinogen (serpin peptidase inhibitor, clade A, member 8)	11606	5	19.0643
Dscr1	363	Down syndrome critical region homolog 1 (human)	54720	6	19.8182
Hnf4a	568	hepatic nuclear factor 4, alpha	15378	6	20.2855
Oaz2	749	ornithine decarboxylase antizyme 2	18247	10	24.727
Per2	794	period homolog 2 (Drosophila)	18627	11	27.4497
Sema3c	940	sema domain, immunoglobulin domain (Ig), short basic domain, secreted, (semaphorin) 3C	20348	3	24.273
Mdk	1228	midkine	17242	5	19.0742
Pou2f1	1564	POU domain, class 2, transcription factor 1	18986	2	21.9664
Abtb1	1660	ankyrin repeat and BTB (POZ) domain containing 1	80283	8	23.2516
Fosl2	1720	fos-like antigen 2	14284	4	26.2044
Kcnv2	1765	potassium channel, subfamily V, member 2	240595	10	41.9958
Rabep2	1971	rabaptin, RAB GTPase binding effector protein 2	70314	12	37.6741
Wdr39	2052	WD repeat domain 39	26371	5	19.8097
Ets1	2200	E26 avian leukemia oncogene 1, 5' domain	23871	12	22.1585
Impg1	2322	interphotoreceptor matrix proteoglycan 1	63859	0	16.4799
Slc19a2	2586	solute carrier family 19 (thiamine transporter), member 2	116914	9	29.3468
Stat1	2636	signal transducer and activator of transcription 1	20846	3	18.8309
Stat3	2638	signal transducer and activator of transcription 3	20848	2	17.1604
1810054G18Rik	393212	RIKEN cDNA 1810054G18 gene	75660	1	18.119
4933407N01Rik	583854	RIKEN cDNA 4933407N01 gene	66753	3	18.8135
Peli1	583865	pellino 1	67245	12	31.5816
Cbwd1	583873	COBW domain containing 1	226043	12	29.0255
6720467C03Rik	587419	RIKEN cDNA 6720467C03 gene	68099	6	17.678
Rps12	631721	ribosomal protein S12	20042	13	27.2399
Hsd3b7	633272	hydroxy-delta-5-steroid dehydrogenase, 3 beta- and steroid delta-isomerase 7	101502	8	21.4651
Ncstn	638705	nicastrin	59287	3	15.8118
Vdp	638711	vesicle docking protein	56041	4	16.9757
Dhcr24	671229	24-dehydrocholesterol reductase	74754	9	25.3477
Fads1	678684	fatty acid desaturase 1	76267	8	24.864
Nmt2	686192	N-myristoyltransferase 2	18108	2	25.6232
Zbtb22	67814219	zinc finger and BTB domain containing 22	81630	1	22.2753
Top3b	67815547	topoisomerase (DNA) III beta	21976	3	25.6356
1300007B12Rik	67978659	RIKEN cDNA 1300007B12 gene	57439	6	20.586
Tmem111	67978660	transmembrane protein 111	66087	5	29.5424
Ccdc127	67978709	coiled-coil domain containing 127	67433	3	28.9713
Ppox	68076525	protoporphyrinogen oxidase	19044	1	16.1338
Luc7l	68080678	Luc7 homolog (S. cerevisiae)-like	66978	5	22.4209
Ppm1d	68080695	protein phosphatase 1D magnesium-dependent, delta isoform	53892	9	23.4524
Ttc14	68148693	tetratricopeptide repeat domain 14	67120	5	37.8377
Rps6kl1	68148754	ribosomal protein S6 kinase-like 1	238323	2	21.3353
Cd8b1	68151390	CD8 antigen, beta chain 1	12526	10	18.7049
Rin1	68203449	Ras and Rab interactor 1	225870	7	19.7193
D13Wsu177e	68301646	DNA segment, Chr 13, Wayne State University 177, expressed	28126	1	17.9262
Cog2	68301796	component of oligomeric golgi complex 2	76332	2	21.8962
Rps13	68301867	ribosomal protein S13	68052	7	26.8172
BC013481	68341292	cDNA sequence BC013481	245945	0	15.802
1810011O10Rik	68341573	RIKEN cDNA 1810011O10 gene	69068	2	15.4245
2210412D01Rik	68341609	RIKEN cDNA 2210412D01 gene	70178	1	27.2238
5830433M19Rik	68341830	RIKEN cDNA 5830433M19 gene	67770	1	16.1206
Sfxn2	68410339	sideroflexin 2	94279	4	18.4815
Bbox1	68410393	butyrobetaine (gamma), 2-oxoglutarate dioxygenase 1 (gamma-butyrobetaine hydroxylase)	170442	4	16.8148
Gpr56	68546530	G protein-coupled receptor 56	14766	2	16.4771
Mfi2	68563098	antigen p97 (melanoma associated) identified by monoclonal antibodies 133.2 and 96.5	30060	9	19.2211
Plcb3	68632942	phospholipase C, beta 3	18797	1	20.6807
Duoxa1	68637527	dual oxidase maturation factor 1	213696	4	16.5597
Btbd3	68637915	BTB (POZ) domain containing 3	228662	9	23.6779
Rfc3	68637921	replication factor C (activator 1) 3	69263	2	15.5698
Atpbd1b	68637927	ATP binding domain 1 family, member B	100210	2	21.1961
Txndc11	68637933	thioredoxin domain containing 11	106200	9	22.3315
Prss32	68666487	protease, serine, 32	69814	3	15.5893
Trp53i5	68666828	Trp53 inducible protein 5	71345	4	16.6227
Pou2af1	68743739	POU domain, class 2, associating factor 1	18985	8	17.7982
Kctd4	68744486	potassium channel tetramerisation domain containing 4	67516	11	36.0708
Hnmt	68744845	histamine N-methyltransferase	140483	9	30.3324
1810030N24Rik	68744875	RIKEN cDNA 1810030N24 gene	66291	6	17.4472
Dffa	68745042	DNA fragmentation factor, alpha subunit	13347	3	16.18
BC052328	68797643	cDNA sequence BC052328	223433	4	17.0933
Zhx1	68843775	zinc fingers and homeoboxes protein 1	22770	5	21.4147
Trim24	68843913	tripartite motif protein 24	21848	6	28.4052
1200009F10Rik	69014901	RIKEN cDNA 1200009F10 gene	67454	4	27.7987
Pfkfb4	69261924	6-phosphofructo-2-kinase/fructose-2,6-biphosphatase 4	270198	3	15.8384
AI606181	69526384	expressed sequence AI606181	226118	2	20.1308
Doc2b	69627072	double C2, beta	13447	2	25.3121
Myh9	69781983	myosin, heavy polypeptide 9, non-muscle	17886	9	34.5829
Ptpn14	69817673	protein tyrosine phosphatase, non-receptor type 14	19250	13	17.5058
Taf15	69980154	TAF15 RNA polymerase II, TATA box binding protein (TBP)-associated factor	70439	10	37.5598
Ociad2	70300469	OCIA domain containing 2	433904	1	17.5791
Pdk1	70437846	pyruvate dehydrogenase kinase, isoenzyme 1	228026	0	18.4501
5630401D24Rik	70445496	RIKEN cDNA 5630401D24 gene	71449	2	15.3804
E030010A14Rik	70565482	RIKEN cDNA E030010A14 gene	226040	13	50.5329
Tmem132d	71021029	transmembrane protein 132D	243274	2	19.1567
Mm.353627	71161171	Unigene Mm.353627	0	7	17.1283
Lphn1	71211689	latrophilin 1	330814	10	16.0969
Nos1	71234633	nitric oxide synthase 1, neuronal	18125	8	33.8278
Glce	71280946	glucuronyl C5-epimerase	93683	11	15.0933
Cic	71307244	capicua homolog (Drosophila)	71722	11	19.6212
Ptprk	71378456	protein tyrosine phosphatase, receptor type, K	19272	12	22.0873
LOC241794	71489812	similar to Potassium voltage-gated channel subfamily G member 1 (Voltage-gated potassium channel subunit Kv6.1) (kH2)	241794	2	19.8831
Dmc1h	71496447	disrupted meiotic cDNA 1 homolog	13404	7	23.0549
Col23a1	71579924	procollagen, type XXIII, alpha 1	237759	9	19.6715
Arsa	71608220	arylsulfatase A	11883	10	32.9213
Dusp1	71608353	dual specificity phosphatase 1	19252	12	18.6863
5730593F17Rik	71656874	RIKEN cDNA 5730593F17 gene	215512	12	18.8925
Pvrl1	73424053	poliovirus receptor-related 1	58235	6	21.4962
Id4	73497044	inhibitor of DNA binding 4	15904	8	16.6732
Kctd6	73584801	potassium channel tetramerisation domain containing 6	71393	1	26.9897
Egr3	73606485	early growth response 3	13655	13	15.8306
Ptprg	74430888	protein tyrosine phosphatase, receptor type, G	19270	7	22.2995
Adam33	74509572	a disintegrin and metallopeptidase domain 33	110751	2	27.0844
Ssbp3	74635614	single-stranded DNA binding protein 3	72475	13	31.2673
