# Supplementary material for: Laminar and Dorsoventral Molecular Organization of the Medial Entorhinal Cortex Revealed by Large-scale Anatomical Analysis of Gene Expression
Source: PLoS Comput Biol. 2015 Jan 23;11(1):e1004032. doi: 10.1371/journal.pcbi.1004032 (PMC4304787; doi:10.1371/journal.pcbi.1004032)
Supplement: S5 Dataset — (XLS) [file pcbi.1004032.s012.xls]

## Sheet: README
Fig5CortSpecific.xls
File contains data for Figure 5
Correlation sheet contains correlations between layers for all MEC, visual and SS layers.

## Sheet: RawHistdata
Region	Genelist	Iseries	D0	D1	D2	D3	D4	D5	D6	D7	D8	D9	D10	D11	D12	D13	D14	D15	D16	D17	D18	D19
MECw	AllReggenelistsL2only	I70437834	3.89093	5.57966	3.07901	0.83212	0.21630	0.47440	1.50170	1.37973	0.28714	0.08931	0.11543	0.67754	1.69420	7.42578	25.19325	28.88169	17.07701	6.44812	0.98429	0.18693
MECw	AllReggenelistsL2only	I70545937	0.71446	1.35028	1.39503	1.93309	1.74783	0.89647	1.73839	1.47497	0.17517	0.99338	2.49486	2.67378	3.68080	16.00115	25.47264	19.30760	4.36580	0.71608	0.01908	0.00000
MECw	AllReggenelistsL2only	I68798663	0.65074	1.38870	4.26749	4.65815	2.70761	1.44255	3.14156	2.81563	3.75942	1.66593	3.16571	9.59097	14.41741	27.07595	20.60303	17.82192	5.79615	0.49943	0.02132	0.00000
MECw	AllReggenelistsL2only	I71494629	0.00000	0.01695	0.05756	0.78345	0.64022	0.26621	0.24349	0.44444	0.08758	0.30430	1.72000	0.59975	0.74777	3.76525	4.69150	7.61021	1.81540	1.10148	3.14141	3.04103
MECw	AllReggenelistsL2only	I76135481	1.85662	2.00452	1.90745	1.54501	1.37174	2.19795	2.12797	2.21368	3.52772	4.47740	8.22057	8.49561	9.31362	10.63061	10.19208	8.65878	4.36920	2.81870	3.49607	11.81003
MECw	AllReggenelistsL2only	I74431661	0.09191	0.27232	0.15124	1.13504	1.52717	1.79750	1.11438	1.51282	2.25388	3.05623	3.58629	5.03388	9.47433	27.34868	40.46100	21.45330	7.12344	0.93729	0.12121	0.00000
MECw	AllReggenelistsL2only	I74357596	1.96814	2.23164	0.85327	0.00852	0.00000	0.00000	0.00000	0.00000	0.00000	0.00000	0.00000	0.20326	1.92188	14.69965	36.78929	38.64384	26.91959	9.32611	0.86981	0.07751
MECw	AllReggenelistsL2only	I74579932	4.04657	1.41921	0.76637	0.48662	1.09565	1.31741	0.59909	0.13065	0.04656	0.00000	0.01371	0.02886	0.33147	2.31530	8.12806	11.78331	10.79841	5.15507	0.58137	2.70061
MECw	AllReggenelistsL2only	I71529965	0.96446	3.55254	2.37133	2.05231	0.92609	1.52901	0.75991	0.77411	0.07761	0.09923	0.39543	1.86073	9.05692	11.49712	12.25378	12.24907	8.84371	3.22805	0.44220	0.00608
MECw	AllReggenelistsL2only	I69540677	0.00000	0.00000	0.00000	0.00000	0.00000	0.00000	0.00000	0.00000	0.00000	0.00000	0.00000	0.00000	0.00000	0.00000	0.00000	0.00000	0.00000	0.00000	0.00000	0.00000
MECw	AllReggenelistsL2only	I69059927	0.00000	0.00000	0.00000	0.00000	0.00000	0.00000	0.00000	0.00000	0.00000	0.00000	0.00000	0.00000	0.00000	0.00000	0.00000	0.00000	0.00000	0.00000	0.00000	0.00000
MECw	AllReggenelistsL2only	I1755	0.00123	0.04633	0.43792	1.08759	2.19022	0.99659	1.05096	3.41880	1.81929	2.92613	1.28914	1.64492	4.58259	4.47756	18.96158	22.40224	15.57305	9.94755	1.01010	0.49848
MECw	AllReggenelistsL2only	I74578317	0.11152	0.78418	0.13205	0.46107	1.01957	1.40273	2.62514	2.62882	1.85477	4.17310	3.38400	2.79925	4.49888	5.90679	12.48661	27.89664	14.48811	3.93501	2.22110	1.47264
MECw	AllReggenelistsL2only	I71668991	0.06127	0.02712	0.00000	0.00000	0.00000	0.10922	0.68630	1.21490	0.51109	1.08600	0.73943	1.17942	0.92746	3.87457	11.40512	18.74346	11.89694	7.17674	0.36588	0.80699
MECw	AllReggenelistsL2only	I79913320	5.45466	5.56271	7.56546	8.85036	10.00326	9.25711	9.20385	7.64103	9.74169	10.76516	12.06629	22.17942	27.00893	37.45224	46.55413	34.89166	12.34881	2.32383	0.42200	0.06383
MECw	AllReggenelistsL2only	I644	0.00000	0.00000	0.00000	0.02190	0.16304	0.41411	1.30804	0.30647	0.02328	0.32856	2.06286	0.47302	0.46875	2.69850	6.15367	6.36488	4.55493	1.25200	0.95960	0.61094
MECw	AllReggenelistsL2only	I70429321	0.41544	0.23955	0.17269	0.75426	2.20217	0.21160	0.03398	0.00000	0.00000	0.00000	0.07771	0.40025	1.45647	1.44649	1.83469	5.01494	2.03398	1.19612	0.13917	0.05775
MECw	AllReggenelistsL2only	I69736010	1.19608	2.26102	2.37585	0.44282	0.56522	0.81911	1.47452	0.38584	1.59534	1.22492	0.36686	1.07528	2.23549	6.48792	11.32363	10.83064	2.39071	0.29532	0.25253	1.75380
MECw	AllReggenelistsL2only	I70919083	7.72181	7.24407	3.98081	6.38686	9.95543	8.78157	9.12231	11.39194	8.63193	7.99559	9.12457	11.99373	32.36272	64.30955	80.50291	70.86052	46.84938	22.20182	6.29742	0.28419
MECw	AllReggenelistsL2only	I71281764	0.00000	0.00000	0.00000	0.00000	0.00000	0.00000	0.00000	0.00000	0.00000	0.03969	0.47200	2.43162	20.68304	31.20713	32.07567	33.99128	18.91393	7.28050	1.39618	0.60030
MECw	AllReggenelistsL2only	I69014518	0.00000	0.00000	0.00000	0.00000	0.00000	0.00000	0.00000	0.00000	0.00000	0.00000	0.03771	0.38394	2.57924	8.01381	10.68685	6.69738	2.99660	1.85405	3.25140	2.73404
MECw	AllReggenelistsL2only	I79677363	1.06495	1.25593	2.29233	3.78893	7.69348	8.47440	4.46942	3.64713	5.48004	8.15821	9.31543	21.01129	43.26897	51.60587	46.88533	26.38543	13.46999	4.20296	2.33838	1.43693
MECw	AllReggenelistsL2only	I67936387	0.00000	0.00000	0.00000	0.03041	0.07065	0.76792	0.83805	0.47009	0.41242	0.57552	0.25486	0.12422	1.25335	6.97238	30.94179	22.96513	4.91846	0.71836	2.22783	2.98328
MECw	AllReggenelistsL2only	I77924520	0.32108	0.08701	0.35440	0.17640	0.26630	0.16724	0.35900	0.87424	0.17738	0.15656	0.47429	1.50314	3.90067	12.17722	12.92782	8.17435	2.05323	0.81072	0.33221	0.04103
MECw	AllReggenelistsL2only	I69169714	1.73039	0.63164	0.70880	0.52798	0.96304	0.68601	2.19706	2.00855	2.37140	1.61632	3.67543	5.79674	9.20871	5.65593	6.03842	5.58780	6.49151	10.61574	4.33782	3.03191
MECw	AllReggenelistsL2only	I68196916	0.18382	1.01695	2.40406	1.47202	1.40109	2.97042	2.98867	1.15263	1.20399	0.75083	1.01600	2.09661	3.92299	13.37169	20.88475	20.63761	9.42809	3.32041	0.09652	0.01672
MECw	AllReggenelistsL2only	I77464846	4.04044	5.33333	7.25621	7.88808	6.58370	6.92719	9.69422	7.62759	8.88581	6.84344	7.13486	6.40151	7.23103	21.08285	41.70314	29.92030	11.87656	4.59065	1.64310	0.31915
MECw	AllReggenelistsL2only	I73497666	0.28676	0.10847	0.55869	1.51582	2.12609	3.30148	3.19366	0.82295	0.13082	0.02756	0.31657	0.31619	1.53571	6.22094	17.54948	13.76837	9.48245	1.31585	0.43322	3.05015
MECw	AllReggenelistsL2only	I71616334	3.07721	3.51299	2.21445	2.58151	3.41630	4.78953	4.92978	2.72650	3.43126	3.78280	2.21714	5.11920	8.07254	11.17146	16.23632	16.02242	13.55493	4.16762	0.74299	0.00000
MECw	AllReggenelistsL2only	I631728	0.01103	0.16949	1.29007	0.85523	0.73043	2.12173	0.53681	0.97924	2.31042	4.22933	4.36800	10.03764	22.72768	51.16341	46.08847	15.54047	10.78256	1.23603	0.10438	0.00000
MECw	AllReggenelistsL2only	I69407152	1.31373	1.61921	1.85666	1.70073	3.27500	3.02730	4.35561	4.47863	2.67627	7.17530	13.93371	17.72396	22.54241	37.80092	47.41094	27.19303	16.91846	3.83466	1.16274	1.46960
MECw	AllReggenelistsL2only	I71920507	0.76961	1.60678	0.30023	0.00000	0.00000	0.00000	0.00000	0.00000	0.00000	0.00000	0.00000	0.03764	0.24107	2.17837	12.48661	19.64757	17.25028	4.81642	0.57912	0.00912
MECw	AllReggenelistsL2only	I69735389	0.00000	0.00000	0.00000	0.00000	0.00000	0.00000	0.00000	0.00000	0.00000	0.00000	0.00457	0.22585	1.41741	10.61220	27.66705	19.80697	7.52661	1.53934	0.22671	0.00760
MECw	AllReggenelistsL2only	I532676	0.34191	0.09831	0.07449	0.17640	1.52500	1.79181	1.39411	1.47375	0.59756	0.71555	1.38057	2.25220	4.84375	15.41887	25.06868	19.27148	6.29898	1.24629	0.18743	0.05471
MECw	AllReggenelistsL2only	I294041	1.11152	0.63164	1.49210	2.94282	5.32500	7.87600	3.69875	1.32357	0.68847	1.76185	2.43429	9.61104	12.51786	16.76640	20.11874	17.75716	9.24575	3.64652	2.67003	0.83435
MECw	AllReggenelistsL2only	I71809385	0.12623	0.50282	2.90632	0.34550	0.01413	0.00000	0.00000	0.00000	0.00000	0.00000	0.19314	1.68256	0.14062	0.72612	5.04191	7.79328	7.94790	3.23717	0.39731	0.00000
MECw	AllReggenelistsL2only	I74562606	0.11029	1.02373	0.16479	0.04015	0.40326	0.82821	1.32390	1.34188	1.37694	2.17971	2.03657	1.03388	1.60714	7.21519	26.18510	20.45828	11.82446	3.17560	2.14927	0.19301
MECw	AllReggenelistsL2only	I69540302	0.00000	0.00000	0.02370	0.26277	1.01848	0.13993	0.44394	0.04151	0.00000	0.00110	0.07086	0.47804	3.29799	7.71692	9.11874	5.96762	3.26501	0.22691	0.01796	0.00152
MECw	AllReggenelistsL2only	I69671654	0.17402	1.06667	0.81716	0.29197	0.22283	0.02275	0.10872	0.32845	0.36031	0.69239	0.11771	0.20201	0.68080	1.24166	5.19092	8.44832	11.59003	6.14937	0.72952	0.09574
MECw	AllReggenelistsL2only	I75694246	0.18137	0.83503	1.34424	0.75547	0.91304	1.55176	0.53454	0.51160	0.68847	1.85226	1.03200	0.84191	2.46763	6.37284	8.11641	4.41968	3.63986	1.49943	0.48709	0.17021
MECw	AllReggenelistsL2only	I69783286	0.00980	0.10621	0.24041	0.67518	0.02935	0.00000	0.00000	0.00000	0.00000	0.01764	0.64229	1.68130	1.66629	3.68700	3.11874	5.81196	4.25821	1.00798	0.08418	0.00000
MECw	AllReggenelistsL2only	I2288	1.27696	1.51073	1.48420	1.64964	1.83696	2.27418	1.68630	1.50549	2.28492	2.13671	2.94171	5.45546	6.59710	14.52014	16.05355	22.22790	15.83918	6.98404	1.83951	0.50304
MECw	AllReggenelistsL2only	I70276951	0.00000	0.00000	0.00000	0.00000	0.00000	0.00000	0.00000	0.00000	0.00000	0.00000	0.00914	0.02258	0.90067	11.37054	36.10827	20.62516	6.36240	0.51425	0.00000	0.01368
MECw	AllReggenelistsL2only	I69818000	0.47917	0.41582	0.25508	0.72384	1.35652	1.94994	0.74632	0.48840	1.79601	1.74642	2.96000	1.92597	3.69420	11.17606	26.21653	20.57908	10.53454	4.69441	0.48934	0.08663
MECw	AllReggenelistsL2only	I2100	0.00000	0.00000	0.00000	0.00000	0.00000	0.00000	0.00000	0.00000	0.00000	0.00000	0.00000	0.00000	0.00000	0.00000	0.00000	0.00000	0.00000	0.00000	0.00000	0.00000
MECw	AllReggenelistsL2only	I69173244	7.73284	7.88023	5.31038	6.35401	3.93696	8.39363	3.97282	4.31380	4.04324	6.27784	8.77829	8.44291	6.29129	27.97699	59.65425	52.62889	42.82220	14.23717	4.73401	1.21733
MECw	AllReggenelistsL2only	I69530702	0.00000	0.00000	0.00000	0.00000	0.00000	0.00000	0.00000	0.00000	0.00000	0.13561	0.35886	0.50314	0.03906	0.00000	0.08033	0.56912	1.83239	2.92588	1.29405	0.29787
MECw	AllReggenelistsL2only	I70919740	0.20466	0.82260	0.38262	0.78345	0.82717	0.59954	0.33296	0.13675	0.01996	0.12348	0.62971	1.08908	1.25223	6.72842	9.22817	4.62889	2.82559	1.98290	0.08866	0.02432
MECw	AllReggenelistsL2only	I69873720	0.33333	0.43729	0.01693	0.00000	0.00870	0.24915	0.57078	0.37118	0.10310	0.17861	1.13600	0.42284	1.44754	3.61450	6.60186	10.05106	7.07928	3.15507	1.54770	1.32371
MECw	AllReggenelistsL2only	I69734446	0.32966	2.04294	1.83973	1.82482	2.22174	0.83163	0.93884	0.09280	0.01330	0.04410	0.52000	1.00125	4.47433	13.39586	19.69150	12.18431	5.07475	0.65108	0.13580	0.76444
MECw	AllReggenelistsL2only	I75197606	1.32598	0.33672	0.06659	0.19343	0.94239	1.16724	1.18800	1.07570	1.02550	0.61301	0.86629	1.20326	1.15737	3.08746	9.32130	12.52055	10.99094	4.05929	0.77666	0.59422
MECw	AllReggenelistsL2only	I2078	0.46324	1.39096	2.08691	1.14234	2.02065	1.59954	1.76670	2.07448	1.74390	0.66262	1.53029	2.04893	2.56696	15.25892	27.68102	26.50934	22.81200	8.55872	1.54209	0.01976
MECw	AllReggenelistsL2only	I70231158	0.00000	0.06893	1.87359	1.02920	0.58804	0.25939	0.18347	0.05128	0.03548	0.00000	0.61600	7.90590	25.27790	31.88493	29.34575	17.72727	5.13024	0.54162	0.08193	0.00304
MECw	AllReggenelistsL2only	I67765705	0.01471	0.36497	3.14673	3.58516	0.20217	0.16951	0.36014	0.86691	0.35033	0.39912	0.53257	0.13049	0.77344	3.27158	7.14435	10.75592	8.52888	4.99202	1.29293	0.10486
MECw	AllReggenelistsL2only	I70203658	0.00123	0.11186	1.23138	3.68491	7.87391	3.52446	2.36467	2.42369	1.05100	0.66593	1.18857	3.03764	15.00893	51.14384	53.07334	30.70486	12.93658	2.84835	0.67228	1.43009
MECw	AllReggenelistsL2only	I77799005	1.56556	1.60565	1.09876	2.52616	1.23587	1.25427	0.61891	0.15018	0.33703	0.64443	1.57600	2.84944	6.76507	9.25949	13.41676	11.34309	6.77576	1.25086	0.09989	0.00608
MECw	AllReggenelistsL2only	I68499195	0.00000	0.00000	0.00000	0.00000	0.00000	0.02389	0.14609	0.68010	0.00000	0.01323	0.11543	0.83940	1.93080	2.87687	8.12806	8.70486	8.37259	4.89624	2.06622	1.78723
MECw	AllReggenelistsL2only	I69013603	0.90441	2.23277	3.52032	8.95377	6.21630	5.58931	4.19366	5.63004	2.53659	3.83793	3.16114	4.94479	10.88058	19.12198	24.11292	29.38979	21.84598	10.18928	1.67340	0.56383
MECw	AllReggenelistsL2only	I79913276	0.00000	0.00000	0.00000	0.00000	0.00000	0.00000	0.00000	0.00000	0.00000	0.00000	0.00000	0.00000	0.17299	0.59033	0.80792	0.34496	0.04304	0.00000	0.00000	0.00000
MECw	AllReggenelistsL2only	I77791984	0.00000	0.00000	0.00000	0.00000	0.00000	0.00000	0.00227	0.23871	0.45455	1.06450	2.72000	2.03513	2.31920	1.89988	2.17171	2.52179	2.45527	0.28848	0.02469	0.00000
MECw	AllReggenelistsL3only	I617	0.08088	0.11864	0.34876	0.24088	0.97826	8.51650	21.87882	21.78999	22.91796	22.63286	16.12114	11.11669	10.26562	6.12773	2.10128	1.07597	0.49377	0.31699	0.33782	0.07295
MECw	AllReggenelistsL3only	I69447846	0.35417	1.16271	1.44470	2.26277	5.65543	21.24460	45.43262	54.41026	56.76940	55.94157	50.48114	48.83563	39.06920	26.05869	7.95460	5.37484	5.63986	2.87229	2.95960	0.72188
MECw	AllReggenelistsL3only	I69835645	0.55270	0.13672	0.48646	0.76156	0.47826	0.49943	0.51189	2.97436	14.54102	15.43550	19.63314	11.94981	15.85826	11.16226	6.98254	3.24284	1.14043	0.43101	0.03816	0.00000
MECw	AllReggenelistsL3only	I74431576	0.12132	0.00000	0.01693	0.18248	0.58043	0.50171	2.64213	3.54945	7.42572	7.08269	11.25600	6.91343	5.80580	2.82048	2.37020	0.91781	1.05549	0.30445	0.06061	0.19605
MECw	AllReggenelistsL3only	I2532	3.58333	4.42599	3.17043	2.57299	4.55761	7.49488	13.23443	22.74725	39.93792	51.76957	73.37943	82.37516	82.08147	76.09896	66.93830	68.96762	41.11212	18.32611	12.24018	10.72644
MECw	AllReggenelistsL3only	I69526934	0.36765	1.05085	3.86230	6.58151	9.44457	9.71900	13.86976	21.08303	21.52993	25.62404	30.45029	30.16186	27.18973	16.32796	14.16531	4.24533	0.78482	0.22691	0.22110	1.01368
MECw	AllReggenelistsL3only	I467	0.50490	1.44068	4.80813	2.34915	3.72174	6.35495	9.26274	9.99389	13.06319	15.82249	15.74629	12.66499	13.01004	9.64097	6.49825	1.86550	2.21744	0.33181	0.37486	0.29635
MECw	AllReggenelistsL3only	I70528342	0.00000	0.00000	0.01580	0.14112	0.65217	0.63823	0.34994	1.55189	2.02217	3.03197	4.43771	3.49310	1.93973	0.17376	0.04424	0.00000	0.00000	0.00000	0.00000	0.00000
MECw	AllReggenelistsL3only	I71892334	3.29412	5.82486	3.41874	3.50608	5.32391	5.51308	6.94337	13.30525	27.40022	27.88975	21.30857	23.51694	24.49219	17.13464	14.56810	9.68991	3.74632	1.10718	0.10325	0.00608
MECw	AllReggenelistsL3only	I71211722	0.00000	0.00000	0.03499	0.17397	0.81522	1.69397	2.72480	3.23199	6.47672	5.48071	3.14400	3.07403	3.84710	1.82739	2.37369	0.31133	0.08267	0.00342	0.10662	0.28875
MECw	AllReggenelistsL3only	I74581199	0.61397	0.72090	0.59932	0.47567	0.49674	2.11149	6.30691	20.91087	32.56541	38.81257	46.65257	50.13300	49.26116	40.35098	26.70896	12.84184	4.82106	1.72862	0.62177	0.22644
MECw	AllReggenelistsL3only	I69028605	0.00000	0.00904	0.09594	0.82603	2.37826	6.60978	9.63647	8.81074	9.77051	12.75744	12.11657	8.67880	4.30580	1.86881	1.63795	1.68991	1.09740	0.25884	0.03591	0.00912
MECw	AllReggenelistsL3only	I68445119	0.99877	0.40226	0.49210	1.35401	4.20109	12.05233	8.58097	9.67766	9.87583	10.58875	8.85486	7.87955	9.81920	4.89183	2.18859	2.43462	1.35674	2.06727	2.86869	1.19757
MECw	AllReggenelistsL3only	I69443148	0.28554	1.04407	2.29007	1.62652	1.43261	1.29352	4.21631	11.36630	8.49113	14.64278	15.30286	11.99122	11.85491	7.00000	3.25611	0.96389	0.25481	0.01938	0.00000	0.00000
MECw	AllReggenelistsL3only	I71656914	0.00000	0.00000	0.13318	0.58637	3.44348	11.40159	22.60589	25.94261	26.08426	30.03308	29.03771	25.36763	12.78683	5.76295	2.83935	2.05604	0.70102	0.00684	0.00000	0.00000
MECw	AllReggenelistsL3only	I79750677	22.63235	13.63616	14.25508	7.46472	9.63804	12.91923	16.54247	33.63736	52.05876	53.12679	48.53486	50.07403	43.57031	32.52014	18.14552	8.63138	7.71914	6.04789	7.13244	6.21429
MECw	AllReggenelistsL3only	I70595931	0.03922	0.87797	0.16479	0.17275	0.51522	2.84642	5.78029	4.83761	4.04102	1.36935	2.20114	2.32748	0.80804	0.10587	0.01281	0.00000	0.13930	0.95097	0.59596	0.00000
MECw	AllReggenelistsL3only	I70300595	6.39216	6.71186	3.68962	0.50608	2.05000	8.28555	28.66818	57.48474	106.09424	112.71224	110.62857	107.14304	117.39621	101.16456	48.84168	11.39477	1.37486	0.68529	0.04938	0.00000
MECw	AllReggenelistsL3only	I2698	2.52696	2.06554	1.75282	1.97324	2.79457	5.98407	8.96942	16.86935	21.57206	46.94157	45.31771	34.26223	31.99330	15.36824	11.20140	6.41843	3.73839	2.48119	1.94613	1.44833
MECw	AllReggenelistsL3only	I70723453	0.11765	0.55593	0.04289	0.00000	0.00000	0.00455	0.28199	1.87302	6.36031	8.71885	17.05829	16.42535	13.27344	11.33832	6.53551	1.89166	0.14043	0.00000	0.00000	0.00000
MECw	AllReggenelistsL3only	I77464884	2.09681	2.67345	2.72573	3.93066	6.05435	8.71786	15.28992	20.04640	21.38359	17.89857	16.76686	12.28858	5.74777	3.61105	2.53318	2.11208	0.84145	0.16078	0.38047	0.01368
MECw	AllReggenelistsL3only	I70302956	5.30515	2.39887	2.29233	1.77981	4.08587	5.46871	21.06116	33.73504	44.10200	45.92282	34.93714	23.07152	21.67299	13.72727	8.62049	3.05106	1.50283	1.82896	2.51740	2.52128
MECw	AllReggenelistsL3only	I70786667	1.12132	1.51638	2.30023	4.31509	5.15217	4.82821	5.67271	8.30525	8.19845	11.29768	13.06743	15.08532	9.32254	7.76064	3.62165	1.51308	0.77237	0.14937	0.00000	0.00000
MECw	AllReggenelistsL3only	I71377947	0.00000	0.00000	0.00000	0.00000	0.06522	0.73038	3.21631	9.59219	22.84146	25.96031	25.45486	28.32622	24.82812	17.94937	13.05471	2.46949	0.81767	0.46408	0.03928	0.00000
MECw	AllReggenelistsL5only	I76098295	11.54779	13.59774	11.32619	7.25304	5.73261	9.36064	6.87429	4.43223	4.69401	4.14884	2.79086	2.31117	2.11830	2.29574	3.63446	3.97385	3.40997	1.64082	0.93042	1.37690
MECw	AllReggenelistsL5only	I71021160	5.55392	6.87910	15.25169	23.94282	29.87935	36.56200	19.30125	3.20269	0.64967	0.03749	0.00000	0.00000	0.00000	0.00000	0.00000	0.00000	0.00000	0.00000	0.00000	0.00000
MECw	AllReggenelistsL5only	I70725459	24.10049	19.16723	24.37359	42.42701	62.39022	55.99204	58.72480	52.56044	18.50000	5.07056	0.70971	0.11669	0.00781	0.01151	0.00000	0.00000	0.08154	0.54048	1.66891	0.06839
MECw	AllReggenelistsL5only	I70595913	9.20711	15.80565	14.10948	8.86861	13.10435	9.32878	9.12118	2.77534	0.34479	0.88534	0.92114	0.40402	0.57031	1.44764	1.98137	2.35243	0.60589	1.64994	4.33221	2.19149
MECw	AllReggenelistsL5only	I74509572	9.68750	8.38983	5.46953	2.05474	0.15435	0.07509	0.66478	0.83394	0.62749	0.07497	0.08457	0.12673	0.63393	0.00575	0.01746	0.10585	0.12797	0.00342	0.00000	0.00000
MECw	AllReggenelistsL5only	I68631869	5.18260	5.26667	10.80361	11.24574	6.97609	3.32082	6.98867	2.97436	1.77938	0.16207	0.00000	0.00000	0.00000	0.01611	0.08033	0.12204	1.07928	0.02851	0.00000	0.00000
MECw	AllReggenelistsL5only	I74821660	29.51961	69.42825	107.10158	126.36983	101.26630	60.96815	31.13024	4.50672	1.79157	0.36053	0.17943	0.27353	1.58036	1.38205	1.06868	1.63138	0.88222	0.09806	0.13580	0.80851
MECw	AllReggenelistsL5only	I77620828	2.39583	6.70960	6.04515	6.39294	5.78587	2.56883	1.49717	1.15018	1.37251	1.64278	0.67771	0.59598	0.72656	1.25547	1.16414	1.32130	1.88901	1.47092	0.31874	0.02584
MECw	AllReggenelistsL5only	I71587595	7.10294	14.42260	16.56659	26.67883	23.74239	9.06257	5.17554	3.04640	2.08758	5.02646	5.71086	4.25471	4.67857	2.44764	3.35623	1.13325	1.38279	0.95439	0.00224	0.00000
MECw	AllReggenelistsL5only	I68845813	3.42157	3.46780	3.00113	9.57664	8.98913	4.67235	0.56059	0.15140	0.03548	0.10364	0.38971	0.50439	0.36496	0.15995	0.04773	0.00000	0.00000	0.00000	0.00000	0.01368
MECw	AllReggenelistsL5only	I69526815	5.81495	10.74576	16.60722	12.90633	7.23370	4.09784	2.25821	0.88767	0.27162	0.02536	0.00000	0.00000	0.00000	0.03682	0.18277	0.59776	0.00000	0.00000	0.00000	0.00000
MECw	AllReggenelistsL5only	I70795748	0.02083	0.41469	5.12190	8.51217	10.05000	6.63595	0.74632	0.14896	0.00000	0.00000	0.00000	0.00000	0.00000	0.00000	0.00000	0.00000	0.00000	0.00000	0.00000	0.00000
MECw	AllReggenelistsL5only	I70919573	6.57108	1.90169	0.58352	0.35888	1.53696	11.57224	20.34315	16.82173	3.41131	0.43881	0.12114	0.00502	0.09040	0.95512	0.19208	0.53798	2.31823	1.27594	0.06734	0.00000
MECw	AllReggenelistsL5only	I70795772	8.14338	15.85424	21.27765	25.07056	14.90652	9.72924	5.71234	4.92918	1.15521	0.81367	0.53943	1.07528	0.60491	1.31530	0.82887	0.13699	0.07248	0.16534	0.62738	1.02736
MECw	AllReggenelistsL5only	I69873475	25.38480	54.99096	72.08465	64.63990	50.05217	39.04437	14.45527	3.91087	0.51330	0.09151	0.35086	1.60728	1.99219	2.26007	1.35157	0.47323	0.51076	0.19384	0.16386	0.80243
MECw	AllReggenelistsL5only	I69816757	21.08088	24.64294	34.17494	27.77494	10.97609	2.69625	3.67724	2.33455	0.61419	0.06505	0.00000	0.00000	0.00000	0.00000	0.00000	0.00000	0.00000	0.00000	0.00000	0.00000
MECw	AllReggenelistsL5only	I68844839	37.76348	30.03390	36.76524	46.24453	47.54674	32.72924	20.53794	6.82540	3.77827	2.57883	2.06286	3.90464	3.12500	3.05984	6.01048	3.36613	2.53681	2.46408	3.16386	3.38602
MECw	AllReggenelistsL5only	I69671732	3.31250	7.16158	6.75056	4.48905	3.32391	2.61092	1.92865	0.88156	0.15078	0.76075	0.20229	0.08156	0.53125	0.25777	0.00000	0.00000	0.00000	0.00000	0.00000	0.00000
MECw	AllReggenelistsL5only	I68844498	0.00000	0.00000	0.00000	0.00000	0.00000	0.00000	0.00000	0.00000	0.00000	0.00000	0.00000	0.00000	0.00000	0.00000	0.00000	0.00000	0.00000	0.00000	0.00000	0.00000
MECw	AllReggenelistsL5only	I79913274	2.22672	2.82090	5.29571	8.03224	6.61033	7.94596	6.72480	2.95421	3.74169	2.90187	2.19943	4.04642	2.97656	3.26525	2.70431	2.64570	4.34485	2.49430	1.90572	0.49620
MECw	AllReggenelistsL5only	I69568836	0.63603	2.15819	2.22122	3.68978	8.06848	6.77816	3.10532	0.42735	0.11973	0.00992	0.00000	0.00000	0.00000	0.05293	0.17462	0.61270	0.15742	0.02052	0.13805	1.14286
MECw	AllReggenelistsL5only	I71234703	44.14951	37.02825	26.93905	7.98418	2.00978	1.59272	0.88675	0.66056	0.06763	0.04851	0.20800	0.60979	0.11272	0.00000	0.09430	0.51557	0.37259	0.00570	0.07969	0.22188
MECw	AllReggenelistsL5only	I71587739	0.00000	0.00000	0.00000	0.00000	0.00000	0.00000	0.00000	0.00000	0.00000	0.00000	0.00000	0.00000	0.00000	0.00000	0.00000	0.00000	0.00000	0.00000	0.00000	0.00000
MECw	AllReggenelistsL5only	I68545545	14.80025	31.79096	71.95485	115.50973	124.91196	78.82253	35.87203	3.79976	2.14523	1.69350	1.33257	1.03262	1.20871	1.92750	3.51572	3.83188	3.28539	2.18244	3.28058	0.39058
MECw	AllReggenelistsL5only	I68151385	10.50490	18.86780	19.77991	31.33820	31.11848	35.64391	23.50510	5.99267	1.88803	0.10033	0.10057	0.49310	0.51674	0.07135	1.28056	0.59029	0.11778	0.75599	3.11448	10.39362
MECw	AllReggenelistsL5only	I77455013	1.61765	2.36836	6.46501	15.47932	22.45652	19.85552	11.15062	7.06349	4.37361	3.21058	3.01943	3.21205	4.84375	3.71692	2.51339	3.74720	1.67044	1.97719	1.09315	0.26292
MECw	AllReggenelistsL5only	I77910649	10.56066	14.30791	18.97799	23.53954	18.28478	14.80489	12.59796	9.26190	6.11918	2.95424	1.49429	0.90652	0.28460	1.01669	1.98719	1.69614	0.63590	0.77594	0.28788	0.01672
MECw	AllReggenelistsL5only	I74822606	1.56985	4.86554	16.49549	18.76642	23.16848	25.76109	19.68177	8.35043	1.72949	0.06064	0.11429	1.33250	0.80022	0.16686	0.40978	2.60523	0.92865	1.11859	0.08193	0.00000
MECw	AllReggenelistsL5only	I68795395	13.86275	12.66893	18.82619	36.07786	10.30652	6.38908	7.91619	6.89011	1.25610	0.07497	0.00000	0.00000	0.00000	0.00000	0.00000	0.00000	0.00000	0.41505	0.11785	0.01368
MECw	AllReggenelistsL5only	I77620431	21.90625	22.21243	41.31885	68.49635	89.38424	65.81058	42.74972	18.97009	6.21951	4.57442	5.15886	5.58783	5.55469	3.87572	5.39232	6.06538	2.88448	1.83295	1.71829	1.03040
MECw	AllReggenelistsL5only	I69288998	13.63971	8.95819	11.29571	14.48418	19.02935	12.43686	7.61495	1.74115	0.76053	0.60198	1.29714	1.50690	0.88951	0.97008	0.75553	0.66999	0.16535	0.42303	0.46914	0.99848
MECw	AllReggenelistsL5only	I69817121	2.39461	3.71638	4.24831	7.66788	6.12500	6.57224	4.03284	1.93040	0.18847	0.00992	0.00000	0.01255	0.24442	0.76410	0.04307	0.00000	0.00000	0.00000	0.00000	0.00000
MECw	AllReggenelistsL5only	I70546081	3.00368	3.62486	3.96840	4.04745	5.52935	11.94312	10.69875	4.89255	1.15521	0.38479	0.03886	0.00000	0.00000	0.00000	0.00000	0.05479	0.10872	1.03535	0.60494	0.07143
MECw	AllReggenelistsL5only	I70611407	10.08088	30.77627	50.06885	53.21655	49.36739	40.40842	20.89581	9.84982	1.60754	0.70011	0.91200	3.29486	3.73214	4.28999	7.95576	4.70237	2.14949	0.21095	0.00000	0.00760
MECw	AllReggenelistsL5only	I69527800	18.34804	24.74915	51.62754	43.93552	48.40326	42.53811	17.70781	7.01587	3.50887	1.65270	1.50743	2.37265	1.67299	2.83890	3.53318	5.23039	3.81087	2.33295	0.23120	0.08511
MECw	AllReggenelistsL5only	I69531097	29.77451	36.82147	41.50677	22.07299	13.16413	14.04778	19.32956	21.30281	9.77494	1.10915	0.07543	0.03513	0.83594	0.24166	0.10594	0.02366	0.21065	0.85861	0.06285	0.00608
SS	AllReggenelistsL2only	I70437834	1.28095	1.45828	4.04871	5.30372	2.85482	3.60316	3.73857	1.47813	0.91795	2.74986	7.01077	10.99259	32.34716	49.71458	43.24515	39.68273	41.39724	39.67655	41.64575	9.93113
SS	AllReggenelistsL2only	I70545937	0.06905	0.81328	1.95450	2.48477	7.06356	10.54983	11.80227	14.71882	23.10606	19.68454	14.78708	5.83924	5.54327	7.39863	9.55714	5.73216	3.43685	3.51919	1.19222	0.12638
SS	AllReggenelistsL2only	I68798663	0.70298	0.21715	1.42877	3.31007	5.81943	5.79809	3.94986	3.42080	3.89227	3.50884	3.70094	4.76349	2.77344	2.07914	1.68758	1.72575	2.62130	3.87362	4.80377	0.45403
SS	AllReggenelistsL2only	I71494629	0.00000	0.00000	0.00000	0.00000	0.00000	0.00000	0.00000	0.00000	0.28356	0.07359	0.00000	0.00000	0.01151	0.11757	0.08172	0.01799	0.00000	0.00000	0.11630	0.23660
SS	AllReggenelistsL2only	I76135481	1.51786	0.96127	0.79688	1.63071	1.11015	2.23023	1.55913	2.29284	2.14066	2.10097	1.46030	1.36461	1.55550	1.74159	1.93079	3.28252	1.88806	3.46370	3.36943	2.40504
SS	AllReggenelistsL2only	I74431661	4.03631	0.84740	1.67601	1.48942	2.57999	3.20596	1.30054	2.73502	2.99163	5.42413	6.80538	6.90966	7.23544	3.93519	3.09638	4.90858	10.76340	14.41277	18.28934	9.89901
SS	AllReggenelistsL2only	I74357596	0.01250	0.06501	0.09926	0.23731	0.94800	3.03567	1.97919	1.89569	0.66369	1.86566	1.16124	0.32662	0.69648	1.06793	1.76477	1.04488	0.69853	0.82269	0.58835	0.50089
SS	AllReggenelistsL2only	I74579932	3.01131	5.22683	8.32812	7.07995	5.31455	3.84921	7.60706	4.65177	2.58805	3.00742	3.91548	2.27519	2.01582	0.37578	0.47370	0.81406	0.41795	0.60319	0.86050	0.75435
SS	AllReggenelistsL2only	I71529965	0.28036	0.00000	0.00000	0.00000	0.00000	0.15925	0.00221	0.00000	0.00000	0.00000	0.06514	0.49618	0.29513	0.16577	0.00000	0.00000	0.16718	0.30369	0.58034	0.61271
SS	AllReggenelistsL2only	I69540677	0.00000	0.00000	0.00000	0.00000	0.00000	0.00000	0.00000	0.00000	0.00000	0.00000	0.00000	0.00000	0.00000	0.00000	0.00000	0.00000	0.00000	0.00000	0.00000	0.00000
SS	AllReggenelistsL2only	I69059927	0.00000	0.00000	0.00000	0.00000	0.00000	0.00000	0.00000	0.00000	0.00000	0.00000	0.00000	0.00000	0.00000	0.00000	0.00000	0.00000	0.00000	0.00000	0.00000	0.00000
SS	AllReggenelistsL2only	I1755	0.24226	0.99908	1.58548	2.14763	3.09679	5.83744	9.90886	8.90930	11.21128	13.02938	8.07887	4.11814	3.71422	6.75592	5.48512	6.39524	3.99291	3.55606	2.26347	0.82872
SS	AllReggenelistsL2only	I74578317	0.42500	0.15583	0.01195	0.17386	0.51860	0.53292	2.62630	3.15322	4.16299	3.98403	8.06891	7.57262	12.88971	13.87910	7.14424	3.35574	2.83282	2.60414	3.17520	3.82606
SS	AllReggenelistsL2only	I71668991	0.00000	0.00000	0.00000	0.00000	0.00000	0.00000	0.00000	0.03304	0.21686	0.56532	0.23284	0.24670	0.22489	0.32966	0.00323	0.11479	0.54552	1.80616	5.43718	6.72009
SS	AllReggenelistsL2only	I79913320	12.51607	12.63900	14.94439	14.70643	14.09751	14.90474	15.60896	17.19857	20.22997	19.33400	18.89529	19.15427	22.85064	31.15974	41.53924	46.40579	49.62166	52.58533	46.59019	9.39776
SS	AllReggenelistsL2only	I644	0.24583	0.00738	0.01700	0.61506	0.31203	0.13976	0.10028	0.02300	0.00000	0.00000	0.09879	0.08107	0.11292	0.00000	0.05304	0.00352	0.59513	3.68187	0.51777	0.83884
SS	AllReggenelistsL2only	I70429321	0.00000	0.04610	0.81893	0.33206	0.16504	0.26885	0.60549	0.16715	0.43539	1.46977	1.16878	1.69771	1.28482	0.88990	0.00496	0.00000	0.12739	0.12581	0.14116	0.58378
SS	AllReggenelistsL2only	I69736010	0.00298	0.23513	0.91452	0.74281	1.03756	0.48106	0.29518	0.34694	0.06726	0.60011	0.70686	0.18300	0.02901	0.29539	0.33894	0.23578	0.02490	0.09825	0.51377	0.47622
SS	AllReggenelistsL2only	I70919083	11.22440	21.51176	26.07583	33.77115	46.78151	55.89665	58.08262	56.65144	61.83282	70.24558	63.28641	53.50058	36.94030	24.01433	32.05261	60.09597	80.91168	60.59084	50.80978	35.50390
SS	AllReggenelistsL2only	I71281764	0.29286	0.00000	0.00000	0.00000	0.06103	0.19934	0.30527	0.72498	0.74519	0.56132	1.26164	1.76650	3.17262	4.23556	4.87279	3.05377	2.94748	0.88331	0.44502	0.29677
SS	AllReggenelistsL2only	I69014518	0.01369	0.34716	0.02528	0.01311	0.26977	0.51490	0.40397	1.57888	1.93888	1.38049	0.80108	0.10864	0.84608	0.88533	0.90880	1.36215	1.28948	1.53991	0.83080	0.54562
SS	AllReggenelistsL2only	I79677363	1.56696	2.40572	2.53653	1.92788	1.70711	3.01912	6.93787	9.27745	11.30477	9.67969	6.39583	5.70524	5.67670	6.57582	8.75561	11.08790	13.18653	17.11403	15.07008	3.28257
SS	AllReggenelistsL2only	I67936387	0.00000	0.00000	0.00000	0.21193	0.34706	0.18316	1.85525	4.81989	4.78035	1.21335	0.07295	0.34932	0.88708	1.70669	1.97477	0.16753	0.78812	1.11460	0.84599	0.68087
SS	AllReggenelistsL2only	I77924520	0.62857	0.97280	0.71461	1.80330	0.89563	0.52078	1.31725	1.70295	1.31231	0.92270	0.82342	1.13736	1.30304	1.98276	1.99892	1.78077	3.37816	2.87058	1.16436	0.19489
SS	AllReggenelistsL2only	I69169714	3.11429	1.83218	2.12822	2.75000	3.17660	4.54321	3.22138	3.87237	2.31035	2.80148	4.91332	4.71832	3.94845	1.50561	1.87796	1.66515	4.79175	5.01596	4.18455	3.05378
SS	AllReggenelistsL2only	I68196916	0.00000	0.00000	0.00000	0.69205	0.72625	0.59066	0.65563	0.97603	2.28049	1.05191	0.56043	0.39032	0.41621	0.10677	0.49073	0.21593	0.62711	0.11555	0.27399	0.25027
SS	AllReggenelistsL2only	I77464846	5.30536	4.79391	6.13879	6.99577	6.76779	6.59875	6.74929	8.73696	7.53782	7.93668	7.43526	7.49687	7.33086	8.57374	7.98167	9.19917	8.83464	9.43577	8.42983	5.42208
SS	AllReggenelistsL2only	I73497666	0.50655	0.41540	0.34926	0.34729	0.47960	0.99485	1.93693	2.45935	1.41585	1.29236	1.18385	0.26847	0.23999	0.60096	0.09142	0.38676	2.56551	5.82459	4.28450	2.55928
SS	AllReggenelistsL2only	I71616334	0.68393	2.85108	3.02711	2.89932	1.92163	3.02942	3.51277	2.67703	4.36506	6.00285	3.26891	1.93769	2.36922	2.12069	2.79452	2.92534	3.94040	4.22672	4.35792	1.84913
SS	AllReggenelistsL2only	I631728	1.23333	0.20701	0.00000	0.12690	0.16901	1.04229	1.50899	0.84840	0.47502	1.81517	1.10121	0.92773	1.90913	3.55962	0.84821	0.58552	0.63620	0.53706	0.40914	0.34895
SS	AllReggenelistsL2only	I69407152	24.78988	20.52467	23.43934	27.45347	32.91730	34.80287	31.49827	31.11046	31.15685	38.34199	36.92894	35.54899	31.28434	36.37744	35.42863	30.85708	24.19081	20.56765	16.48590	9.43113
SS	AllReggenelistsL2only	I71920507	0.61726	0.56939	1.24173	3.85491	4.47887	6.11732	7.40681	7.53871	10.27519	15.86937	19.21750	20.01923	13.19875	12.48110	12.34260	20.13237	29.91205	25.64823	16.97764	8.34239
SS	AllReggenelistsL2only	I69735389	0.00000	0.00000	0.00000	0.00000	0.00289	0.41412	0.15389	0.01555	0.38738	1.68369	4.01373	4.91754	1.57708	0.21375	0.26822	1.23309	2.21297	1.35101	0.97631	0.56958
SS	AllReggenelistsL2only	I532676	1.83869	1.47994	3.89844	7.61125	10.49151	8.02427	7.07663	8.66731	11.72481	8.37165	5.11063	2.23535	6.18437	7.64686	14.60091	21.78573	21.76231	22.17294	19.53462	9.40238
SS	AllReggenelistsL2only	I294041	0.14643	0.63347	0.74449	0.82191	1.55255	7.04965	15.91611	18.21186	10.70109	4.59897	1.20242	0.57054	1.00671	2.46822	4.44114	8.08687	12.82755	19.69308	12.18305	3.55005
SS	AllReggenelistsL2only	I71809385	0.08512	0.29184	0.28860	0.48900	0.00867	0.20743	0.02050	0.00000	0.00000	0.00000	0.00000	0.00000	0.13666	0.22081	0.52674	0.24116	0.88406	0.47815	0.74837	0.99272
SS	AllReggenelistsL2only	I74562606	1.16726	1.00184	0.53263	0.05203	0.83785	1.00184	0.77956	1.03239	2.27714	4.73103	5.24092	3.62590	0.81803	0.26153	0.49784	0.20207	0.72415	0.31433	0.53145	0.57384
SS	AllReggenelistsL2only	I69540302	0.00417	0.66667	0.38511	0.64805	0.05345	0.15631	0.09808	0.06511	0.38069	0.29150	0.09771	0.00000	0.03596	0.36851	1.01574	0.84757	0.79230	1.64310	1.76873	0.07118
SS	AllReggenelistsL2only	I69671654	0.35893	0.38036	0.96967	1.24704	0.35934	0.63626	0.80290	1.07094	1.03768	2.54392	3.02961	2.74797	0.31096	0.10241	0.04269	0.02296	0.08577	0.59996	2.06641	2.63472
SS	AllReggenelistsL2only	I75694246	1.28869	1.14523	1.10800	1.34856	1.39112	1.19161	1.68054	1.31519	0.86464	1.15659	0.55828	1.08663	1.14984	0.96178	0.81005	1.89597	2.59204	3.12087	1.72017	1.10206
SS	AllReggenelistsL2only	I69783286	0.00000	0.00138	0.17279	1.37183	1.50740	0.58220	0.12173	0.47684	0.26626	0.00228	0.00000	0.00000	0.01439	0.11924	0.21410	0.36422	0.01745	0.14918	0.13616	0.00532
SS	AllReggenelistsL2only	I2288	4.30833	6.85984	3.48346	3.24873	4.61647	5.17985	4.47714	3.70878	4.56545	3.94752	3.62369	5.25874	8.44857	11.60719	13.34239	9.89969	2.44267	1.09103	0.52428	0.71033
SS	AllReggenelistsL2only	I70276951	0.00000	0.00000	0.00000	0.00000	0.00000	0.00000	0.00000	0.00000	0.00000	0.00000	0.00000	0.00000	0.00000	0.00000	0.00000	0.00000	0.00000	0.15089	0.03387	0.00000
SS	AllReggenelistsL2only	I69818000	5.94286	5.29645	8.35708	6.74704	6.84146	8.27657	8.42857	11.07191	15.81077	21.01882	21.13001	14.30994	5.49748	3.29996	6.09034	9.78862	11.75377	13.80559	16.77874	6.90575
SS	AllReggenelistsL2only	I2100	0.00000	0.00000	0.00000	0.00000	0.00000	0.00000	0.00000	0.00000	0.00000	0.00000	0.00000	0.00000	0.00000	0.00000	0.00000	0.00000	0.00000	0.00000	0.00000	0.00000
SS	AllReggenelistsL2only	I69173244	14.62440	10.64269	11.12132	9.47843	11.75623	9.79698	11.32230	11.01523	16.74714	22.07416	18.58789	11.29836	7.24023	10.58143	13.53428	15.94043	13.13120	6.79000	5.95845	5.25009
SS	AllReggenelistsL2only	I69530702	0.00000	0.00000	0.00000	0.00000	0.00000	0.00000	0.00000	0.00777	0.68685	2.11808	6.21184	3.57795	0.95373	0.20835	0.00000	0.22441	1.05760	0.12923	0.19289	0.12105
SS	AllReggenelistsL2only	I70919740	1.09940	0.26648	0.68612	1.40271	2.30119	1.61199	2.39735	2.48753	3.55317	4.76098	2.22880	0.76766	0.46775	0.69734	0.69513	0.87797	2.33454	0.85196	0.42733	0.17394
SS	AllReggenelistsL2only	I69873720	0.00000	0.01475	0.44026	0.06810	0.51607	0.84737	0.96563	1.30807	3.69858	3.76070	3.70013	2.86310	1.12203	1.62879	3.50776	8.87818	19.09304	32.21285	34.17320	11.03284
SS	AllReggenelistsL2only	I69734446	0.30893	0.71830	0.72748	0.92428	0.97653	0.45421	1.48565	1.39035	0.97851	1.89903	0.58143	0.21983	0.23759	0.25696	0.48038	0.50962	0.96366	1.79380	3.02536	0.98509
SS	AllReggenelistsL2only	I75197606	0.39821	0.69571	0.84237	1.04019	0.63741	0.94005	0.75781	1.49595	0.85013	0.50799	0.71709	0.90781	1.16207	0.43955	0.56145	0.71644	0.37689	0.45211	0.85416	0.18619
SS	AllReggenelistsL2only	I2078	2.47976	2.84693	2.91544	4.07572	2.50776	3.32438	2.58184	2.55782	2.56629	4.26412	3.23338	2.37526	1.63654	1.83569	1.29474	3.02441	4.46175	4.34208	4.94644	6.03639
SS	AllReggenelistsL2only	I70231158	1.51429	3.07561	1.87408	6.38283	5.70242	4.17874	6.78051	6.27988	6.78677	14.97490	16.08802	12.05884	7.38360	7.49314	11.89521	26.19876	27.88842	28.68092	29.07425	5.11910
SS	AllReggenelistsL2only	I67765705	0.75238	2.56754	3.35662	2.87690	2.89130	3.09562	3.68748	3.17881	3.65057	5.55990	4.83176	3.39935	4.60321	3.47943	1.32492	1.24447	1.62275	1.40802	1.28450	0.82410
SS	AllReggenelistsL2only	I70203658	0.37619	0.57031	0.45175	0.23096	0.88552	1.85105	0.33712	0.68189	0.26737	0.82373	2.70256	2.84040	0.69000	0.43830	0.68672	2.10776	5.45775	10.16724	13.00868	4.31221
SS	AllReggenelistsL2only	I77799005	3.84970	2.96911	3.67371	3.70685	2.76309	2.58514	1.97383	2.57175	2.98981	1.88192	1.87604	1.10215	1.88756	1.00509	1.30962	1.99400	2.43694	4.13388	6.46204	3.85960
SS	AllReggenelistsL2only	I68499195	0.28571	0.57676	0.35018	0.15651	4.26147	7.39353	7.46358	10.24133	5.63997	2.69253	3.86703	2.20153	1.31335	2.83236	3.71755	4.34271	6.25877	7.36773	8.29651	3.10011
SS	AllReggenelistsL2only	I69013603	2.17619	4.96127	6.28722	8.49873	7.95125	8.95991	10.95806	9.62844	10.76919	15.92698	17.67268	11.90618	7.14625	2.16805	2.25248	7.10010	10.72924	10.28544	8.99249	5.16933
SS	AllReggenelistsL2only	I79913276	3.17500	1.95482	2.14108	1.91286	2.22066	4.39095	4.88143	2.29932	2.95200	2.45608	1.29798	0.84781	1.23040	1.78853	1.65373	2.62027	2.31619	1.72216	1.19723	0.29872
SS	AllReggenelistsL2only	I77791984	2.42679	2.18972	2.13074	2.26882	2.03088	1.26388	0.91596	1.16715	0.98423	1.08942	0.40296	0.70952	0.57996	0.67584	0.68154	1.01944	1.63429	2.04428	1.41565	0.41738
SS	AllReggenelistsL3only	I617	0.00000	0.00000	0.00000	0.00000	0.12604	0.04229	0.14664	0.22190	0.00000	0.00000	0.00000	0.06787	0.04124	0.07914	0.36028	1.50300	3.04143	2.51995	1.05874	0.25950
SS	AllReggenelistsL3only	I69447846	1.56726	3.61319	4.29825	4.30288	9.92019	10.19934	8.48534	9.00842	8.51633	11.62750	12.27537	8.83692	9.14049	14.41026	11.90082	10.03433	8.07142	9.16572	5.35141	1.61803
SS	AllReggenelistsL3only	I69835645	0.87560	2.41863	1.74632	5.23646	4.43409	9.08202	5.18196	7.39229	9.61401	3.38306	8.19327	6.25828	6.67322	6.44744	5.60522	5.29411	4.98764	5.27651	2.50242	0.06709
SS	AllReggenelistsL3only	I74431576	0.00000	0.74182	0.04917	0.09772	0.49440	0.53659	0.01798	0.16197	0.51437	0.62293	0.77550	0.25064	0.26756	0.08662	1.52156	0.15098	0.06760	0.00000	0.00017	0.09301
SS	AllReggenelistsL3only	I2532	23.59821	35.21346	28.31388	31.80795	38.23583	47.92350	50.85020	46.08098	47.37427	40.58842	29.59381	42.48413	84.31048	94.09680	97.43208	96.54953	96.77794	94.20506	90.06558	81.58165
SS	AllReggenelistsL3only	I69526934	7.50833	7.85062	5.65579	1.77157	2.16649	1.34461	0.11794	0.55685	0.35027	1.34113	0.59408	0.38823	0.48286	0.23432	0.26930	0.21034	0.42958	0.64329	0.41732	1.56479
SS	AllReggenelistsL3only	I467	8.59107	3.96266	4.68704	5.34222	3.77826	4.36889	3.49290	0.20084	0.16718	0.73160	0.20808	0.34237	1.11868	3.15642	7.98663	14.21386	15.35272	16.59198	19.72251	17.09727
SS	AllReggenelistsL3only	I70528342	0.00000	0.00000	0.00000	0.00000	0.00000	0.00000	0.00000	0.00000	0.00000	0.00000	0.00000	0.00000	0.00000	0.00000	0.00129	0.52451	1.33836	2.54428	1.85850	0.11111
SS	AllReggenelistsL3only	I71892334	4.97857	6.43154	9.05469	11.41794	9.85157	11.37403	10.70766	7.58763	8.37845	10.11922	9.28775	7.62984	8.16375	7.50062	11.42216	15.44633	20.56769	21.84417	18.98882	5.95332
SS	AllReggenelistsL3only	I71211722	1.49643	2.69894	3.30882	3.14890	2.87505	2.15999	1.81425	0.82507	0.69886	0.96577	1.15666	0.63123	0.83409	0.31242	2.19685	5.48356	11.83027	18.96598	24.62623	9.75825
SS	AllReggenelistsL3only	I74581199	0.24345	0.24574	0.81526	0.23435	1.37342	2.19529	2.62599	1.83090	1.64108	3.02367	2.17012	1.30762	1.37233	2.01122	2.27038	3.12161	4.88424	6.97453	9.17053	5.53869
SS	AllReggenelistsL3only	I69028605	0.05000	5.14569	0.05653	0.00000	0.00000	0.00000	0.05487	0.65047	0.59140	3.61865	5.19112	4.43085	2.24526	0.20503	0.33096	2.34043	2.59822	2.99278	3.35909	1.46521
SS	AllReggenelistsL3only	I68445119	1.27560	0.97234	1.11994	1.22208	1.20802	2.04046	2.00694	2.60253	2.87022	2.21078	1.62369	1.06509	0.62191	0.59555	0.91268	2.30300	2.63965	3.53630	2.47172	1.34682
SS	AllReggenelistsL3only	I69443148	8.90000	16.10881	16.59145	23.09941	28.29180	30.87054	30.55471	23.60285	15.55345	13.41472	15.49125	16.40561	24.38168	24.05754	23.83161	33.83102	30.12139	23.65868	19.60487	2.97852
SS	AllReggenelistsL3only	I71656914	0.06607	0.01383	0.06158	0.33714	0.14662	0.88341	0.82971	0.95044	1.32152	0.82772	3.05276	2.88047	3.15080	1.50312	4.39931	4.43702	2.81010	2.74876	3.95995	1.89741
SS	AllReggenelistsL3only	I79750677	9.04702	7.90779	6.97105	5.09264	6.32467	6.69364	8.43992	8.12666	10.21100	11.21506	12.17847	8.43549	7.37353	6.60885	6.22229	6.39214	6.97183	6.44413	8.12548	7.61857
SS	AllReggenelistsL3only	I70595931	0.00000	0.00000	0.00000	0.00000	0.00000	0.00037	0.18259	0.07904	0.00000	0.00000	0.00000	0.00000	0.00000	0.00000	0.00000	0.10879	0.03434	0.00000	0.00000	0.00000
SS	AllReggenelistsL3only	I70300595	3.21369	5.27201	4.67096	4.09518	5.47418	4.36447	8.08294	12.28766	17.72956	15.20878	16.87591	20.71323	8.48334	2.00561	3.78094	5.04736	6.26458	7.50114	3.23344	0.43504
SS	AllReggenelistsL3only	I2698	0.00357	0.01199	0.72381	0.65440	1.00361	1.39058	1.57048	1.18691	0.66983	0.72675	1.36258	1.78411	2.21817	2.22622	1.45903	0.82358	1.10685	2.32649	3.53179	2.20518
SS	AllReggenelistsL3only	I70723453	0.00000	0.00000	0.00092	0.06430	0.24196	0.03236	0.00000	0.00000	0.00000	0.00000	0.00000	0.00000	0.00000	0.00000	0.03083	0.53526	0.52808	1.65146	0.88570	0.32215
SS	AllReggenelistsL3only	I77464884	6.82083	10.30613	9.99449	13.04061	6.78115	6.77161	6.09461	3.66991	2.31370	1.99173	2.97174	4.17906	4.47255	7.00748	7.66214	6.98366	6.33582	6.11612	4.80244	4.35144
SS	AllReggenelistsL3only	I70302956	18.24167	14.32872	18.88603	17.50677	24.39834	24.18205	28.65531	24.61419	24.38152	33.52225	35.97685	40.86333	59.83793	72.83735	52.01876	21.67073	19.35217	21.52927	21.56983	20.28967
SS	AllReggenelistsL3only	I70786667	21.11429	25.87229	30.55285	27.84095	36.83351	41.31813	40.36361	34.64302	19.21518	21.07017	20.41454	24.79523	29.67322	33.31658	38.42820	41.02544	40.81901	38.59502	37.55098	12.05857
SS	AllReggenelistsL3only	I71377947	0.00000	0.00000	0.52344	0.21151	0.18707	0.00000	0.00000	0.05410	0.44934	0.43525	0.04065	0.00649	0.38168	0.07104	0.14187	0.20476	0.25441	0.52946	0.57233	0.13916
SS	AllReggenelistsL5only	I76098295	7.15893	6.95989	2.47702	2.32445	2.64969	3.14344	3.29612	2.64593	2.59392	2.76383	3.08264	3.18485	3.54615	3.10345	1.95278	2.76587	3.08486	3.07982	2.68580	2.32215
SS	AllReggenelistsL5only	I71021160	0.00536	0.00000	0.00643	0.26142	0.46118	0.38286	0.50457	0.65565	0.03740	0.00029	0.00000	0.00996	0.15728	0.75073	1.23997	0.22441	0.26077	0.00133	0.10395	0.17856
SS	AllReggenelistsL5only	I70725459	11.65417	46.31812	31.26287	30.90440	22.55327	18.13534	18.57111	18.10917	16.75105	14.53223	4.43822	0.77484	0.60681	1.10989	0.57482	0.49886	0.78539	0.14690	0.07092	0.06621
SS	AllReggenelistsL5only	I70595913	11.13333	5.86077	2.17279	2.30838	2.69700	4.21147	2.83759	2.12439	3.68127	2.71506	2.52463	0.54946	0.25605	0.38367	0.09724	0.53113	0.34345	0.49639	0.53195	0.84523
SS	AllReggenelistsL5only	I74509572	0.06726	0.82988	0.52665	0.59814	0.63741	0.45164	1.72185	2.87010	0.76891	0.90245	2.20431	5.74658	14.91705	29.97362	36.22876	29.92740	18.89697	19.38293	15.93709	4.38800
SS	AllReggenelistsL5only	I68631869	22.95833	10.85892	4.81066	2.25254	0.51932	0.04340	0.04320	1.22838	3.16634	2.98232	1.63419	0.09984	0.14817	0.59639	0.00345	0.13154	0.57532	2.05891	2.36626	2.01278
SS	AllReggenelistsL5only	I74821660	3.12679	18.92762	33.79504	37.45981	31.20116	26.37477	21.80858	12.21801	2.10438	0.31917	0.26487	0.39402	0.89427	3.76942	7.43467	18.11148	18.52099	11.83960	5.68680	0.62833
SS	AllReggenelistsL5only	I77620828	1.00774	1.18995	0.91222	1.52200	1.62044	0.84847	1.04730	2.72757	3.07954	2.47091	2.79569	2.60991	3.05538	2.21334	1.95192	1.90651	2.26331	3.15431	1.79910	0.59869
SS	AllReggenelistsL5only	I71587595	1.66905	1.19502	0.84835	0.68486	1.66558	0.76940	1.63955	2.13605	2.37259	2.89361	1.15801	1.07876	0.78255	1.27856	1.60694	1.17311	1.45030	3.22938	3.85016	1.93663
SS	AllReggenelistsL5only	I68845813	21.94167	14.12125	11.02574	14.37056	9.13579	5.39684	4.23210	4.14772	2.02931	1.60268	0.96958	2.21473	1.94294	1.56543	0.96529	0.77084	0.50881	0.32440	0.50993	0.55165
SS	AllReggenelistsL5only	I69526815	0.55417	17.00231	20.59283	20.84856	22.10581	18.65723	14.28004	7.79527	8.02289	5.09013	8.03769	10.53741	4.13138	1.33839	0.01164	0.03164	0.28112	0.45306	0.66227	0.70199
SS	AllReggenelistsL5only	I70795748	20.52857	21.91010	41.58180	36.23519	44.65114	42.55167	38.11101	24.19436	4.32961	0.53594	0.37577	0.82650	0.45385	0.86560	1.54420	0.55016	1.17100	1.58533	0.53980	0.05218
SS	AllReggenelistsL5only	I70919573	0.00000	0.02075	0.16636	0.33629	0.06862	1.16992	2.67297	5.09232	10.81943	13.33685	15.05626	17.07714	12.99760	4.26298	0.72962	0.13837	0.12375	0.14937	0.06257	0.13862
SS	AllReggenelistsL5only	I70795772	0.59226	10.73260	37.98621	12.93486	6.76345	7.82641	3.82119	4.87885	4.09238	4.45722	3.84845	2.84966	2.52314	0.61612	0.48103	1.30962	0.68581	0.52984	1.36876	0.95900
SS	AllReggenelistsL5only	I69873475	12.68571	44.15214	28.51608	28.49535	19.92813	14.72453	11.23557	5.43311	2.61569	3.36052	6.41588	2.78457	0.66651	0.00935	0.34045	0.42627	1.15482	1.59597	4.93743	5.73021
SS	AllReggenelistsL5only	I69816757	19.89167	27.03504	9.29136	2.86041	1.99531	1.87643	1.49480	1.78652	0.92660	0.98517	0.20646	0.01668	0.12059	0.00270	0.00000	0.08025	0.03107	0.00000	0.34574	0.14111
SS	AllReggenelistsL5only	I68844839	21.83750	24.05809	25.25781	19.31430	19.27772	14.44281	20.15011	25.65436	36.99191	42.49344	30.58600	14.70813	9.37329	10.00436	12.34368	19.09969	24.89369	38.55777	38.63024	15.02787
SS	AllReggenelistsL5only	I69671732	0.72976	3.60765	4.97472	6.22039	7.05562	6.97904	4.90571	4.89310	2.19648	1.80747	0.59327	0.00000	0.00000	0.00000	0.01207	0.23888	0.40959	0.23717	0.22676	0.06834
SS	AllReggenelistsL5only	I68844498	0.00000	0.00000	0.00000	0.00000	0.00000	0.00000	0.00000	0.00000	0.00000	0.00000	0.00000	0.00000	0.00000	0.00000	0.00000	0.00000	0.00000	0.00000	0.00000	0.00000
SS	AllReggenelistsL5only	I79913274	2.63393	3.45067	4.53653	5.54103	6.29722	5.88249	5.93598	3.69679	3.31301	3.31303	3.26797	3.12393	3.86634	3.68020	2.89219	2.59493	2.46011	3.43035	3.46596	3.12753
SS	AllReggenelistsL5only	I69568836	0.76190	6.70862	12.94945	7.80415	3.03828	1.82236	2.11321	2.01361	3.34189	3.40445	3.24495	2.95367	1.70415	0.30037	0.28806	0.16091	0.15719	0.06043	0.50659	0.39297
SS	AllReggenelistsL5only	I71234703	37.36964	7.81005	0.13327	0.00000	0.02709	0.34976	0.19931	0.51765	0.43176	1.25271	2.10363	1.56104	3.21626	0.87329	0.34196	0.90734	1.24332	2.97548	1.96679	0.07100
SS	AllReggenelistsL5only	I71587739	0.00000	0.00000	0.00000	0.00000	0.00000	0.00000	0.00000	0.00000	0.00000	0.00000	0.00000	0.00000	0.00000	0.00000	0.00000	0.00000	0.00000	0.00000	0.00000	0.00000
SS	AllReggenelistsL5only	I68545545	14.81905	49.15214	69.17647	64.85491	67.20657	37.51122	24.11921	18.88176	16.19816	20.67655	22.88506	7.68589	1.43467	0.65995	1.08732	4.23185	8.28984	14.67237	27.87285	9.16241
SS	AllReggenelistsL5only	I68151385	14.27738	2.77271	0.45864	0.09264	0.44204	1.11401	0.74361	1.78199	5.19732	2.32573	4.19192	6.55339	14.20810	18.91899	6.38055	1.19793	0.09686	2.02452	1.07659	0.07082
SS	AllReggenelistsL5only	I77455013	1.94762	3.71185	4.22472	1.51481	1.35789	2.30710	2.27972	0.73437	0.69132	0.70051	1.24307	1.42692	1.38552	1.59119	0.72488	1.50465	1.84390	1.06708	1.24545	0.60543
SS	AllReggenelistsL5only	I77910649	5.11756	2.46104	3.44187	3.00021	3.53648	3.47481	5.66809	7.86459	8.09238	3.53879	0.76514	0.15682	0.26145	1.28386	1.52781	2.94364	4.51963	4.95534	5.76431	2.83387
SS	AllReggenelistsL5only	I74822606	10.02024	8.44260	9.72518	11.81853	12.63344	11.85142	11.56039	6.54778	7.35529	8.11010	6.02207	2.52907	2.62695	5.62027	5.30466	6.88438	10.42213	10.66040	12.43868	10.81807
SS	AllReggenelistsL5only	I68795395	16.95833	26.62287	13.11627	3.07995	0.87071	0.54469	0.71019	0.14512	0.79375	0.87764	0.29852	0.70489	0.41908	0.00062	0.22100	0.27280	0.22860	0.43805	0.83581	0.31008
SS	AllReggenelistsL5only	I77620431	18.70208	17.85731	27.39453	34.03849	43.52564	51.64270	44.47824	31.98801	17.59336	13.75271	17.26205	20.42275	27.05394	31.80027	35.97305	36.40352	28.41804	23.77993	18.25238	15.19347
SS	AllReggenelistsL5only	I69288998	4.90417	10.90503	19.91452	27.73350	32.79451	35.73483	37.21318	29.61322	24.77393	22.82744	22.98627	23.84966	28.12563	33.06668	37.16818	40.26474	33.75232	22.62904	14.03070	6.74299
SS	AllReggenelistsL5only	I69817121	0.56071	0.69848	3.02114	3.53723	5.63922	8.40640	4.47556	3.48364	1.84706	1.58699	1.75020	1.44846	2.08104	2.44578	2.87926	3.86908	3.94585	3.81946	0.69815	0.16738
SS	AllReggenelistsL5only	I70546081	1.88274	2.40249	1.13006	2.97504	3.38137	4.18389	4.23746	2.84840	4.92018	1.99943	1.28991	0.09196	0.69144	0.65580	1.34519	2.24612	1.77976	1.44109	1.20240	0.42865
SS	AllReggenelistsL5only	I70611407	18.92381	38.54311	11.95175	9.42640	11.71578	14.42369	16.35635	18.53968	18.93106	13.45665	12.88641	9.66806	3.78878	2.63128	5.33269	4.87446	4.04688	5.33029	3.99566	1.92048
SS	AllReggenelistsL5only	I69527800	8.98690	28.44306	16.50460	11.16074	14.12821	18.52519	18.64901	20.05669	16.47558	12.06959	11.44953	6.23859	3.72908	3.41317	3.46313	2.52616	2.99219	3.01482	2.63774	1.81061
SS	AllReggenelistsL5only	I69531097	24.40714	33.16874	26.36489	19.24535	21.99314	21.93453	18.23242	18.65468	18.58471	17.77210	9.71844	1.24485	0.61832	0.66431	1.59875	2.43289	3.71070	8.15146	10.70582	1.90948
Vis	AllReggenelistsL2only	I70437834	3.82084	1.54682	1.28571	2.62087	4.12983	2.46010	1.33783	0.55995	2.90845	22.36594	32.95897	47.28953	45.70575	42.47767	32.35611	30.83245	27.56649	20.16684	6.69403	0.75264
Vis	AllReggenelistsL2only	I70545937	0.37017	1.56242	3.04082	2.91575	2.73976	4.12843	9.49747	12.32074	15.15024	12.18987	4.43077	3.20893	6.21073	5.28801	3.48037	2.60319	1.02679	6.35042	0.07733	0.00000
Vis	AllReggenelistsL2only	I68798663	0.35912	1.93695	2.42660	2.11601	1.39008	1.10973	2.24115	2.08873	1.45773	0.51093	1.00513	1.36294	2.59347	3.17160	5.20172	5.60000	4.50852	3.03452	1.60286	0.60935
Vis	AllReggenelistsL2only	I71494629	0.00710	0.36205	0.44174	1.05768	1.68609	1.27307	0.33277	0.00540	0.00000	0.00000	0.01652	0.26437	0.94027	0.94832	1.23077	0.28830	0.64637	1.24425	0.04391	0.00503
Vis	AllReggenelistsL2only	I76135481	2.98185	3.41386	3.63068	3.26118	3.89094	1.95885	3.24115	3.53777	3.46581	2.74166	1.37778	1.66478	2.82356	2.57501	3.09790	3.21436	3.81393	3.26569	1.29165	0.18150
Vis	AllReggenelistsL2only	I74431661	2.27545	2.69351	3.13693	4.82372	3.24928	1.59040	4.10793	6.36151	8.38180	9.64845	7.56125	8.99435	10.78429	9.82689	13.59118	16.23191	19.69703	9.66684	6.11217	0.51835
Vis	AllReggenelistsL2only	I74357596	0.00000	0.00000	0.07110	0.37654	0.41373	0.16209	0.40191	1.08693	0.39580	0.01151	0.00000	0.03183	0.42810	1.06422	1.69930	0.37766	0.04774	0.00000	0.28115	0.19306
Vis	AllReggenelistsL2only	I74579932	0.96212	3.94132	7.47070	8.84511	8.36872	5.64651	0.98988	0.81115	2.00700	2.24799	1.35385	1.44405	2.61947	8.71550	10.78967	10.23085	7.70726	7.46548	1.84296	0.32579
Vis	AllReggenelistsL2only	I71529965	0.09155	0.77466	0.84661	0.57097	0.49683	0.43703	0.06577	0.29616	0.61605	2.27215	0.79658	0.29004	0.03706	0.08279	1.18558	0.90532	1.88310	1.82741	1.24153	0.04475
Vis	AllReggenelistsL2only	I69540677	0.00000	0.00000	0.00000	0.00000	0.00000	0.00000	0.00000	0.00000	0.00000	0.00000	0.00000	0.00000	0.00000	0.00000	0.00000	0.00000	0.00000	0.00000	0.00000	0.00000
Vis	AllReggenelistsL2only	I69059927	0.00000	0.00000	0.00000	0.00000	0.00000	0.00000	0.00000	0.00000	0.00000	0.00000	0.00000	0.00000	0.00000	0.00000	0.00000	0.00000	0.00000	0.00000	0.00000	0.00000
Vis	AllReggenelistsL2only	I1755	1.09550	0.77341	0.70375	0.30006	1.64570	1.08915	1.11580	2.94724	2.81637	1.05293	0.63590	0.48357	0.82246	0.68540	0.86875	0.43457	0.37798	0.92259	0.51790	0.21921
Vis	AllReggenelistsL2only	I74578317	0.00000	0.00312	0.56682	0.24822	1.06751	4.90960	3.35863	2.58873	2.44265	6.52301	11.36581	12.36858	11.74668	9.04566	6.88488	4.81915	1.98880	4.04707	3.14415	0.98643
Vis	AllReggenelistsL2only	I71668991	0.22731	5.55805	2.09743	0.20480	0.62493	0.40898	1.38617	1.67266	1.99246	1.53510	1.37664	1.06160	2.59900	5.54792	9.89779	15.84043	17.07306	7.70397	2.92888	2.85772
Vis	AllReggenelistsL2only	I79913320	6.73796	9.45506	12.14220	11.45820	12.62320	13.64464	13.45194	14.36751	14.60743	13.33199	12.40741	16.66889	25.11007	31.89814	33.63959	36.75160	37.36434	18.48954	4.85919	1.39819
Vis	AllReggenelistsL2only	I644	0.00631	0.00000	0.00000	0.00000	0.00000	0.11534	0.15964	0.00540	0.00000	0.12543	0.86382	0.06879	0.00442	0.01305	0.18774	0.38564	0.30638	0.08944	0.29547	0.02815
Vis	AllReggenelistsL2only	I70429321	0.00000	0.00000	0.00000	0.00000	0.00577	0.05486	1.07813	2.99341	2.05277	0.88205	0.07350	0.00103	0.02102	0.33718	0.14201	0.53670	0.54749	0.42207	0.79666	0.76772
Vis	AllReggenelistsL2only	I69736010	0.84767	1.15793	0.88282	1.24887	0.13156	0.83603	2.42102	2.82254	1.91061	1.17089	0.82165	1.30698	0.31748	0.99147	1.54061	0.64574	1.42182	0.72228	0.25442	0.01257
Vis	AllReggenelistsL2only	I70919083	31.11208	55.84395	63.29756	71.04925	47.10964	40.67207	60.53682	73.16966	71.94238	61.84407	43.39715	34.19405	62.22622	94.64375	104.46853	93.98564	84.43156	73.88285	35.58854	2.42886
Vis	AllReggenelistsL2only	I71281764	0.00000	0.00000	0.00000	0.00000	0.00000	0.00000	0.00225	0.25659	2.46257	4.33832	3.91909	5.40144	3.13219	3.96488	2.10651	1.21809	0.26547	0.11506	0.37375	0.56712
Vis	AllReggenelistsL2only	I69014518	0.00000	0.00000	0.12574	1.27997	1.63070	2.74002	4.34851	5.36331	3.54766	3.34292	4.41254	5.34292	8.65487	8.10537	8.74180	8.54043	3.08670	1.19404	0.25012	0.00704
Vis	AllReggenelistsL2only	I79677363	2.70403	2.59988	3.84562	3.92255	5.16099	5.18017	7.78134	13.00839	12.32310	12.67491	12.25726	10.30724	11.10343	14.14200	18.63448	21.54601	19.26473	11.57348	3.23699	0.39844
Vis	AllReggenelistsL2only	I67936387	0.00000	0.00000	0.00000	0.00518	0.14772	1.02618	0.95953	0.19365	0.05816	0.00978	0.00741	0.32392	0.03982	0.03763	0.11350	0.90213	0.86946	1.03033	0.77661	1.07240
Vis	AllReggenelistsL2only	I77924520	0.51697	0.72472	1.17775	0.76798	0.73572	0.75187	2.21304	3.26619	6.76791	9.23820	10.93846	11.77002	10.95133	16.13146	19.80043	24.29468	13.68095	5.37291	0.41050	0.00000
Vis	AllReggenelistsL2only	I69169714	1.81452	2.47441	3.46280	4.94362	3.98557	2.51247	0.92749	1.56894	3.57674	3.55409	2.80969	2.78080	2.56139	3.53086	4.20925	3.07447	3.18607	4.89174	1.74177	0.71594
Vis	AllReggenelistsL2only	I68196916	0.92186	0.86829	2.33772	2.85677	2.02712	0.61534	0.34851	1.23561	1.66020	0.96605	1.19943	0.74795	0.53374	0.68841	1.21409	0.96649	1.56405	2.84990	0.64391	0.04274
Vis	AllReggenelistsL2only	I77464846	5.94712	7.25031	8.08295	6.84446	7.53376	6.12157	6.63744	6.64808	6.49542	8.36191	8.09516	6.65914	6.03429	6.81786	6.40506	7.43245	6.75499	4.70816	2.44296	0.23379
Vis	AllReggenelistsL2only	I73497666	0.60142	2.75843	2.11652	1.34025	1.17542	1.10037	1.99719	3.79796	3.61443	4.19390	3.67464	0.38398	0.10398	0.59257	1.40022	1.48989	2.03312	1.75889	0.66444	0.01056
Vis	AllReggenelistsL2only	I71616334	2.25730	3.84519	4.42791	4.74401	4.88690	4.42332	3.11298	4.03118	5.36349	3.15362	1.92194	2.43275	3.32301	3.82439	4.82625	4.97394	6.83000	5.48431	1.35418	0.65058
Vis	AllReggenelistsL2only	I631728	0.00000	0.00000	0.00000	0.01296	0.21639	0.49626	0.50422	0.10252	0.52181	0.70886	0.44274	0.08778	0.00553	0.00803	0.00000	0.00000	0.00000	0.00366	0.12315	0.86275
Vis	AllReggenelistsL2only	I69407152	17.14759	17.12110	21.23305	20.69216	18.57588	19.97257	21.97752	28.03237	29.01831	28.10472	27.26097	20.95483	14.92423	16.53387	16.67402	15.25851	11.75792	8.03609	4.50358	2.97486
Vis	AllReggenelistsL2only	I71920507	0.05209	0.57054	0.03752	0.06870	0.38546	1.70262	1.54975	3.66906	4.05547	5.57825	6.21083	4.04517	5.15819	9.08580	11.29640	13.55106	9.77155	4.73536	2.30358	0.61136
Vis	AllReggenelistsL2only	I69735389	0.00000	0.04744	0.29361	0.06481	0.07848	0.42519	0.30242	2.03357	4.09855	4.75719	2.66667	1.03131	0.35675	0.38485	0.59494	0.39787	0.79104	0.25523	0.07685	0.00251
Vis	AllReggenelistsL2only	I532676	0.14838	1.56679	1.97959	2.88270	4.09406	3.65399	2.75660	5.12170	8.05008	6.45685	1.73333	1.89579	5.82743	15.67085	17.31630	21.36915	18.34389	12.14017	6.55084	3.23580
Vis	AllReggenelistsL2only	I294041	3.80189	5.70474	5.15273	4.39274	3.38200	9.61658	29.77797	29.59173	23.96769	12.59954	7.21140	8.11499	12.27212	14.34521	21.52717	32.28298	29.11106	20.41527	7.96229	9.26244
Vis	AllReggenelistsL2only	I71809385	0.67561	0.25156	0.02831	0.02592	0.27005	0.03554	0.00000	0.00300	0.22348	0.23705	0.24900	0.29979	0.00664	0.23833	0.78214	0.40904	0.70774	0.54393	0.85489	0.06285
Vis	AllReggenelistsL2only	I74562606	0.75059	1.76092	1.97959	1.21517	0.82458	0.87095	1.69196	4.09293	3.18578	1.74453	0.56695	0.08162	0.01272	0.03261	0.61108	0.23032	0.49196	0.20554	0.00000	0.00000
Vis	AllReggenelistsL2only	I69540302	0.00710	0.12921	1.26399	3.87362	3.13676	1.67145	1.26925	2.20743	0.74529	0.03855	0.00000	0.01129	0.06305	0.35625	0.36095	0.40053	0.11982	0.00052	0.00000	0.00000
Vis	AllReggenelistsL2only	I69671654	2.83899	3.56492	1.89203	1.20156	1.78881	1.23628	1.70039	5.19904	4.04685	2.27906	1.63818	1.19302	0.69137	1.00702	2.72351	4.20372	7.68777	2.90795	1.48067	0.01106
Vis	AllReggenelistsL2only	I75694246	0.81926	1.20162	1.14549	0.71484	1.02539	1.05860	1.64081	0.78297	1.41949	2.25777	1.10769	0.34394	0.66704	1.09985	0.78107	1.86011	2.25913	1.49634	1.13699	0.13977
Vis	AllReggenelistsL2only	I69783286	0.02052	0.02247	0.40553	0.03953	0.00000	0.00000	0.02811	0.42266	0.48896	0.33142	0.57721	0.25770	0.00000	0.00000	0.00000	0.00000	0.00000	0.00000	0.00000	0.00000
Vis	AllReggenelistsL2only	I2288	4.48066	4.07303	2.41145	3.79456	2.52741	2.16895	1.90275	1.41427	2.84491	3.77330	3.99088	10.28183	14.70962	8.96287	3.81818	0.73138	0.31223	0.59100	0.26205	0.38462
Vis	AllReggenelistsL2only	I70276951	0.00000	0.00000	0.00000	0.00000	0.00000	0.00000	0.00000	0.00000	0.00000	0.00000	0.00000	0.00000	0.00000	0.00000	0.00000	0.00000	0.00000	0.00000	0.00000	0.00000
Vis	AllReggenelistsL2only	I69818000	6.74191	7.45069	8.12837	7.51199	6.07675	4.59788	13.85554	26.44245	29.59989	13.66628	5.78860	1.39990	2.58684	4.91520	6.35126	8.84362	13.77740	16.39383	7.39666	1.11262
Vis	AllReggenelistsL2only	I2100	0.00000	0.00000	0.00000	0.00000	0.00000	0.00000	0.00000	0.00000	0.00000	0.00000	0.00000	0.00000	0.00000	0.00000	0.00000	0.00000	0.00000	0.00000	0.00000	0.00000
Vis	AllReggenelistsL2only	I69173244	12.16338	11.91760	8.46807	9.25729	10.25216	7.27369	7.68128	10.39928	12.30856	16.77848	15.10883	10.49127	9.22456	8.62268	10.26842	8.18723	6.02728	8.31956	6.93031	4.78582
Vis	AllReggenelistsL2only	I69530702	0.33544	0.03745	0.00066	0.00000	0.00000	0.15461	1.56830	4.83453	12.26817	5.75834	1.64330	0.07957	0.17920	0.13447	0.02797	0.06330	0.22358	0.00262	0.00000	0.00000
Vis	AllReggenelistsL2only	I70919740	0.75454	1.37516	4.37459	4.16267	3.14945	2.51870	4.81619	3.82434	2.71190	0.35846	0.01368	0.36396	0.26493	0.29353	0.10758	0.00000	0.00000	0.00000	0.00000	0.00000
Vis	AllReggenelistsL2only	I69873720	0.70955	0.83084	1.42594	2.75632	2.54010	4.67581	3.11411	4.48741	5.91761	4.68872	8.14245	7.23203	6.69967	17.59308	23.44164	22.92394	34.88553	14.91946	16.47685	0.85872
Vis	AllReggenelistsL2only	I69734446	2.21389	2.46192	1.65306	2.04601	2.17311	1.44514	1.23665	1.14029	0.42380	0.17434	0.01083	0.00719	0.32246	0.41194	1.13878	2.02660	3.67560	3.16684	1.03198	0.12267
Vis	AllReggenelistsL2only	I75197606	1.18232	0.60175	0.42594	0.45107	0.31910	0.24252	0.37549	0.59532	0.83845	0.54488	0.55442	1.18583	1.07246	0.72353	0.75417	0.29043	0.48709	0.94874	0.90358	0.09854
Vis	AllReggenelistsL2only	I2078	4.06235	2.71910	3.94931	4.98963	3.92672	3.22444	4.80270	6.28058	3.87722	2.59724	1.38063	1.89682	2.30697	4.67035	6.76923	7.52340	7.29859	7.31747	5.38377	2.40121
Vis	AllReggenelistsL2only	I70231158	2.42068	4.72160	3.80448	2.83020	2.82920	3.69888	2.39460	3.43465	5.39634	4.46893	3.10313	6.41992	16.17091	21.04415	18.35449	17.35372	18.49537	15.42312	2.68544	0.22222
Vis	AllReggenelistsL2only	I67765705	0.49092	0.79650	2.58525	1.36487	1.02712	0.66521	1.87915	0.83813	0.56058	0.27158	0.18006	0.07700	0.42588	0.92674	0.49166	0.62819	0.44520	0.23013	0.00000	0.00000
Vis	AllReggenelistsL2only	I70203658	2.82320	4.51124	2.53193	2.62346	1.86555	1.72382	1.70995	4.04017	4.71405	1.98216	1.45128	1.00873	2.69358	7.57802	18.24099	29.37021	42.75353	31.94195	6.77613	0.61840
Vis	AllReggenelistsL2only	I77799005	2.21902	3.38390	3.25675	3.84478	3.63878	1.97569	1.58797	1.89508	1.87076	2.27043	1.86268	2.11037	2.27572	3.05921	3.69527	5.56809	6.96079	5.16423	1.40811	1.15485
Vis	AllReggenelistsL2only	I68499195	0.00000	0.05930	0.66754	0.10564	0.56665	0.79364	0.70995	0.49341	0.74637	0.06674	0.00399	0.00462	0.32854	1.15153	1.22485	3.16915	1.96493	1.14331	1.83294	0.92408
Vis	AllReggenelistsL2only	I69013603	3.94002	6.52310	9.40948	7.65781	8.15234	7.08666	10.89151	16.92326	14.16909	10.55811	4.69459	3.67864	6.21903	10.59057	8.54061	8.82606	10.79347	6.06381	2.72888	0.51584
Vis	AllReggenelistsL2only	I79913276	0.00000	0.00000	0.00000	0.00000	0.00000	0.00000	0.00000	0.00000	0.00000	0.00000	0.00000	0.00000	0.00000	0.00000	0.00000	0.02713	0.16269	0.05387	0.00000	0.00000
Vis	AllReggenelistsL2only	I77791984	1.18272	1.46910	2.10204	2.53759	1.86901	1.35256	1.09809	1.66127	0.99542	1.34436	2.29088	4.00821	1.93695	2.31736	2.74368	3.56596	3.08743	0.72568	0.23675	0.00603
Vis	AllReggenelistsL3only	I617	0.00000	0.00000	0.14549	1.26118	0.51183	0.04738	0.19618	0.21643	0.05493	0.04373	0.00057	0.00000	0.00996	0.11841	0.59333	0.47766	0.44812	0.44561	1.40143	1.71543
Vis	AllReggenelistsL3only	I69447846	3.78137	3.37828	5.39236	4.94167	6.69302	5.58853	7.40022	9.43525	10.60205	13.54776	14.27977	14.08265	15.01217	9.95384	4.43357	7.20426	3.60935	1.58316	1.65346	2.06385
Vis	AllReggenelistsL3only	I69835645	0.00000	0.10549	0.58591	0.51523	0.50433	1.55112	2.13828	1.89089	3.43349	2.56041	4.95271	5.16992	7.25608	7.32564	9.05594	8.95000	7.19143	0.60303	0.00382	0.00000
Vis	AllReggenelistsL3only	I74431576	0.41594	0.16729	0.69124	0.11601	0.25909	0.06858	0.02080	0.12530	1.09962	1.05063	0.98063	0.11140	0.32135	0.10587	0.31953	0.35851	0.08378	0.40010	1.47112	0.49372
Vis	AllReggenelistsL3only	I2532	31.33386	33.36330	34.87163	46.39663	61.84420	63.04988	63.25632	51.04137	40.51966	43.99712	67.19715	95.38398	108.84900	115.65278	118.26036	108.42500	98.28300	91.87866	78.23389	50.46657
Vis	AllReggenelistsL3only	I69526934	3.20205	6.45443	1.28242	0.17174	0.29140	0.71883	0.21754	0.07134	0.59989	2.23763	1.37949	0.58368	0.03540	0.01355	0.17805	1.48191	3.63955	2.07584	1.58663	0.38110
Vis	AllReggenelistsL3only	I467	3.36938	5.24157	4.04608	2.35904	2.37161	0.55112	0.19393	0.01859	0.51804	2.55696	3.61823	10.02053	17.77378	33.18665	32.01990	30.41968	23.16366	13.98222	11.22768	2.26998
Vis	AllReggenelistsL3only	I70528342	0.00000	0.00000	0.00000	0.00000	0.00000	0.00000	0.00000	0.00000	0.00000	0.00000	0.00000	0.00000	0.00000	0.00000	0.00000	0.00000	0.00000	0.00000	0.00000	0.00000
Vis	AllReggenelistsL3only	I71892334	8.71665	12.33645	14.87623	14.05120	14.87132	11.94763	12.13491	9.58873	9.21756	8.19793	9.61880	12.95277	19.82080	26.34320	25.93491	23.81170	18.62932	6.07636	1.76468	1.11513
Vis	AllReggenelistsL3only	I71211722	2.14286	3.66979	3.84595	7.01555	5.21581	1.58416	2.72569	4.61691	4.11093	5.25374	3.34416	5.42505	6.07633	14.93076	24.11565	28.83245	24.91378	19.23013	5.12124	0.44394
Vis	AllReggenelistsL3only	I74581199	2.49408	4.93258	12.00461	16.95139	15.93941	10.15461	9.09387	14.00000	5.60528	4.61220	5.38462	3.43070	2.02268	2.69293	4.75471	5.75904	5.50511	2.55178	2.93413	1.79387
Vis	AllReggenelistsL3only	I69028605	0.00000	0.09988	0.41475	0.17758	0.01847	0.00000	0.00000	0.08453	0.35757	2.86766	4.70655	2.91838	2.32135	2.67486	2.15169	3.23564	4.84559	4.47960	0.74988	0.05229
Vis	AllReggenelistsL3only	I68445119	1.98027	6.36517	4.20079	4.02592	5.19100	5.43267	6.96684	4.83094	5.22186	4.49194	3.78746	4.68994	6.40044	6.21576	7.91124	15.91011	13.34048	2.82270	2.14702	0.25138
Vis	AllReggenelistsL3only	I69443148	17.68429	33.33770	31.42528	27.71549	17.23485	16.18516	16.73356	18.74700	17.89391	15.51554	13.97037	15.53799	18.26991	23.36277	21.49112	19.67287	14.70093	3.61245	1.24153	0.04877
Vis	AllReggenelistsL3only	I71656914	0.45067	0.39950	0.62344	0.06546	0.22793	0.61284	0.11861	0.72602	1.00054	1.10184	0.95214	0.48665	0.76051	0.96237	0.05648	0.36489	2.41646	1.37395	0.11933	0.03167
Vis	AllReggenelistsL3only	I79750677	6.19890	4.63109	5.33048	9.58134	9.73860	7.09850	5.47948	6.85492	10.39311	13.60875	14.02507	9.51745	7.89270	7.62017	6.76439	7.30904	8.17876	7.79498	8.22959	7.48115
Vis	AllReggenelistsL3only	I70595931	0.00000	0.00000	0.02238	0.35062	0.31275	0.02556	0.05790	0.04676	0.00539	0.00000	0.00000	0.05955	0.38330	0.06172	0.10758	0.82181	0.01169	0.00000	0.00000	0.00000
Vis	AllReggenelistsL3only	I70300595	2.15391	3.41261	3.84463	7.04277	6.30583	12.06671	23.84148	15.70204	14.40711	10.33314	7.46040	3.64014	1.11449	3.50426	6.99677	5.94521	4.09693	2.93724	0.25728	0.00000
Vis	AllReggenelistsL3only	I2698	0.31571	0.00687	0.00000	0.00000	0.00058	0.37469	0.20798	0.13070	0.20571	0.40794	0.60114	0.35729	0.28706	0.66182	1.28402	0.24787	0.47930	0.62866	0.53699	0.12670
Vis	AllReggenelistsL3only	I70723453	0.26835	0.27403	0.00066	0.14193	0.54068	0.01621	0.00000	0.00000	0.00000	0.00000	0.00285	0.04928	0.26604	0.17160	1.08499	2.01436	0.72138	0.29550	0.00048	0.00000
Vis	AllReggenelistsL3only	I77464884	6.01657	7.14794	7.74523	8.02009	4.81535	3.32170	4.01180	2.54976	4.21917	5.56962	5.84558	4.72895	4.25055	6.03562	7.10651	4.69255	3.56016	2.11088	1.03580	0.60282
Vis	AllReggenelistsL3only	I70302956	2.85478	3.01311	4.31534	4.95204	5.90883	6.93890	17.67285	26.71643	32.68713	44.00978	43.72251	34.91478	20.32024	13.68891	9.65143	10.30426	13.58354	10.92259	11.49881	7.83962
Vis	AllReggenelistsL3only	I70786667	37.00710	42.77778	47.71297	35.77835	30.71783	21.69701	25.36931	24.15288	24.78675	23.91139	35.63419	41.55493	38.57965	36.96889	36.01183	33.72128	29.63663	16.85199	1.51551	0.02212
Vis	AllReggenelistsL3only	I71377947	0.00000	0.00000	0.00000	0.00000	0.00981	0.14651	0.08600	0.02518	0.00054	0.44476	0.16752	0.59394	0.43584	0.17662	0.58365	2.23936	1.41111	1.83002	0.53508	0.04525
Vis	AllReggenelistsL5only	I76098295	7.47119	4.86392	3.24226	4.36034	4.62320	4.80237	4.22091	4.05156	4.33764	4.78654	5.24444	5.11140	4.54369	3.84546	4.62076	3.60479	4.39698	2.78138	1.37518	1.10458
Vis	AllReggenelistsL5only	I71021160	0.46725	0.37016	0.15076	0.35645	0.00173	0.04426	0.30635	0.17986	0.00431	0.00000	0.00000	0.03439	0.16814	0.00351	0.00861	0.00106	0.10278	0.48117	0.48544	0.09553
Vis	AllReggenelistsL5only	I70725459	16.25178	58.58365	51.98486	47.37459	35.42181	23.27930	10.90556	3.22002	1.31449	0.17319	0.38860	0.74384	0.01438	0.09533	0.21140	0.00000	0.00000	0.00000	0.02100	0.24082
Vis	AllReggenelistsL5only	I70595913	6.66219	6.15855	8.98420	4.06740	2.73283	1.86035	0.73581	1.98621	1.63220	1.69045	1.21937	0.69405	0.17312	0.37381	0.97795	1.27872	0.36240	0.42050	0.86921	0.14228
Vis	AllReggenelistsL5only	I74509572	1.20916	0.14919	0.00066	0.00130	0.20716	0.09539	0.00000	0.00000	0.01023	0.92002	5.38177	22.91632	28.74834	15.26192	8.37816	7.82340	7.70287	3.67939	0.69117	0.05329
Vis	AllReggenelistsL5only	I68631869	10.09550	6.75094	5.26926	4.28905	0.69417	0.84601	1.69365	2.33393	3.08131	1.12888	0.60513	1.27669	0.13219	0.03312	0.00000	0.00000	0.02435	0.29132	0.23389	0.04575
Vis	AllReggenelistsL5only	I74821660	48.49645	86.24719	82.85122	72.43746	32.92383	9.17706	1.41259	0.48381	0.11739	0.21577	0.62051	1.03696	5.19469	11.17561	12.91770	12.62713	6.07501	2.82897	1.30883	0.07743
Vis	AllReggenelistsL5only	I77620828	1.56511	2.11923	1.80777	1.00065	0.83151	1.07668	1.07026	1.04676	1.13247	0.67319	1.44387	1.37064	2.02655	3.04466	2.30393	1.14096	0.78178	0.95607	0.13890	0.00000
Vis	AllReggenelistsL5only	I71587595	3.79321	3.66979	4.33246	2.26896	3.00692	2.05736	4.01518	5.09113	5.20248	2.71577	1.47464	1.05031	1.63662	1.72504	3.52071	4.84096	4.29859	2.41632	0.70931	0.07944
Vis	AllReggenelistsL5only	I68845813	12.76006	21.06492	14.63199	11.67531	7.35718	5.17643	1.15795	0.78537	0.92892	1.01611	1.65527	1.84959	1.77323	1.97541	0.68747	0.38723	0.07160	0.00000	0.00477	0.41629
Vis	AllReggenelistsL5only	I69526815	10.42620	35.11798	40.00856	30.32145	20.26313	13.57357	10.18212	6.16187	5.98277	6.41312	3.29231	0.64938	0.03208	0.00000	0.00000	0.00745	0.20458	0.07165	0.57232	0.22775
Vis	AllReggenelistsL5only	I70795748	8.30229	18.98065	17.77485	14.33701	9.83497	2.78117	0.81057	0.99041	0.04200	0.00000	0.03647	0.44199	1.23285	0.26091	0.33943	0.55106	0.73648	1.46077	0.04964	0.00905
Vis	AllReggenelistsL5only	I70919573	0.04657	0.50749	0.99078	1.66299	2.07905	4.82481	13.25183	35.75719	40.50458	34.94994	19.41538	5.78850	1.76493	0.48821	0.31630	0.04255	0.43059	0.86454	0.49594	0.01860
Vis	AllReggenelistsL5only	I70795772	25.30939	32.30462	33.08295	21.59559	15.34680	8.69015	5.56605	2.23981	1.96823	1.41715	1.11738	0.70842	0.34569	0.50728	0.28833	0.43032	0.31710	0.18672	0.79189	0.24736
Vis	AllReggenelistsL5only	I69873475	38.92976	48.05368	37.40816	34.18471	27.59319	20.22007	12.68184	13.08153	17.06839	8.32221	4.98803	1.86396	0.80033	1.17963	1.81334	3.74947	9.70628	9.44404	5.87685	1.31926
Vis	AllReggenelistsL5only	I69816757	27.45304	13.40886	13.40948	10.61309	5.64859	2.48067	1.83474	0.49460	0.05116	0.06789	0.08376	0.00205	0.00000	0.00000	0.00000	0.00000	0.00000	0.00000	0.00000	0.00000
Vis	AllReggenelistsL5only	I68844839	49.19416	65.35081	53.11389	46.12119	30.79862	29.30362	67.12085	72.16007	62.48142	46.80610	39.73333	36.58624	44.06692	53.94932	60.02044	71.59681	81.72577	42.76517	7.02053	0.45701
Vis	AllReggenelistsL5only	I69671732	3.27940	2.49313	3.46412	4.42709	2.98615	3.16584	2.31254	1.44604	1.03339	0.06502	0.00000	0.33727	0.11726	0.00000	0.00000	0.00000	0.00000	0.00000	0.00000	0.00000
Vis	AllReggenelistsL5only	I68844498	0.00000	0.00000	0.00000	0.00000	0.00000	0.00000	0.00000	0.00000	0.00000	0.00000	0.00000	0.00000	0.00000	0.00000	0.00000	0.00000	0.00000	0.00000	0.00000	0.00000
Vis	AllReggenelistsL5only	I79913274	10.43370	14.95880	12.91968	9.17693	5.87363	2.80798	3.32546	4.85971	4.15751	2.98677	2.48832	2.57829	2.34237	3.24285	3.65438	4.30346	5.02996	4.95581	2.16110	0.80442
Vis	AllReggenelistsL5only	I69568836	3.79163	8.90824	6.32587	6.54504	5.17311	2.15773	0.98314	0.85971	1.46688	1.77388	0.65869	0.75667	0.19524	0.03261	0.25390	0.04521	0.62445	0.63912	0.47351	0.87531
Vis	AllReggenelistsL5only	I71234703	27.40884	3.15106	0.21659	0.60661	0.30929	0.01995	0.00112	0.09592	1.73936	3.15305	5.43932	3.27669	1.80144	0.92273	0.80581	1.37128	1.84413	0.95188	0.04678	0.00000
Vis	AllReggenelistsL5only	I71587739	0.00000	0.00000	0.00000	0.00000	0.00000	0.00000	0.00000	0.00000	0.00000	0.00000	0.00000	0.00000	0.00000	0.00000	0.00000	0.00000	0.00000	0.00000	0.00000	0.00000
Vis	AllReggenelistsL5only	I68545545	107.07735	133.85268	123.46675	96.08814	55.78419	27.95075	22.56661	31.13010	24.28918	20.98677	9.43647	3.75154	5.95796	12.35424	15.85153	26.05851	38.99854	17.38128	6.36038	5.25440
Vis	AllReggenelistsL5only	I68151385	3.20284	3.58614	1.03621	0.39274	0.20600	0.45511	0.20967	2.88849	10.55412	23.06502	33.22507	18.66427	6.87998	1.65881	0.82410	0.75319	0.43692	0.63285	0.36659	0.11664
Vis	AllReggenelistsL5only	I77455013	3.04972	2.35331	2.74654	3.14841	2.31564	2.08978	1.39236	1.08693	1.05708	1.23533	1.50883	0.84394	0.70465	1.38284	1.38999	1.07660	0.60107	0.72176	0.71169	0.01006
Vis	AllReggenelistsL5only	I77910649	10.25059	6.57491	6.25346	8.83798	6.81073	7.04271	19.82322	22.01679	10.67609	1.93901	0.36638	0.61473	2.72262	5.67010	9.35368	11.04096	11.13030	10.34022	2.86635	0.31875
Vis	AllReggenelistsL5only	I74822606	5.79242	10.56617	11.42133	10.47505	5.99885	4.36471	3.81113	4.66966	4.17501	1.82796	0.77151	1.94405	3.25996	2.81786	5.85637	7.21436	6.61081	8.37918	4.39332	0.40925
Vis	AllReggenelistsL5only	I68795395	19.70955	19.90637	3.85517	1.12119	0.02308	0.00561	0.24733	0.06295	0.48358	0.22842	0.27521	0.43480	0.77212	0.56749	1.09198	0.63085	1.88992	1.59257	0.34033	0.31171
Vis	AllReggenelistsL5only	I77620431	12.30110	17.46473	23.39928	26.95755	24.14224	20.53709	18.79399	24.11781	32.67528	47.23648	54.06068	64.54774	62.45990	51.73307	38.67402	35.14282	28.92207	20.82165	11.69451	4.07667
Vis	AllReggenelistsL5only	I69288998	10.64404	18.06055	24.64911	28.51329	31.39585	30.75436	29.81506	26.31235	28.52719	32.60817	34.78917	29.74949	37.45465	36.25238	31.16729	27.07128	21.97662	16.17416	7.50024	1.29160
Vis	AllReggenelistsL5only	I69817121	3.42147	3.25718	4.00987	4.13351	2.63185	0.70262	3.68859	5.48861	6.61659	3.29517	1.44900	1.38450	2.14381	4.29152	6.30877	5.92287	4.99367	1.86977	0.29021	0.73856
Vis	AllReggenelistsL5only	I70546081	7.23283	5.23908	3.54641	6.41218	6.75072	5.30860	3.72288	2.97602	1.99354	1.83257	1.05128	1.29774	0.35841	1.70196	6.26466	4.27553	2.43254	1.80335	0.20525	0.00000
Vis	AllReggenelistsL5only	I70611407	26.18153	44.23845	30.83344	24.04148	20.72764	12.95574	5.93817	5.08753	3.93269	2.90219	1.30484	0.50205	1.37721	1.42097	2.61538	2.65319	2.47151	1.82008	0.86730	0.23328
Vis	AllReggenelistsL5only	I69527800	28.03394	30.13983	24.15866	18.55930	16.82920	9.03741	7.18662	5.73981	4.08454	3.98964	2.48946	1.90144	1.53650	3.47667	2.12103	2.25957	2.94545	2.21914	1.48258	2.32278
Vis	AllReggenelistsL5only	I69531097	51.50197	42.25655	36.17446	35.11536	23.50260	10.47569	14.84036	21.60791	24.68013	24.97066	6.48148	2.69507	2.84403	3.36026	6.11027	9.24096	10.89722	8.18201	1.75179	0.11161

## Sheet: IndivSummary
Region	Genelist	Image	GeneName	Peak Expression	Deep-Sup proportions	Position of maximum [0 (WM) - 20 (BS)]
Vis	AllReggenelistsL2only	532676	2310047O13Rik	Sup	0.251	0.251
Vis	AllReggenelistsL2only	67765705	2810439F02Rik	Deep	0.772	0.772
Vis	AllReggenelistsL2only	70203658	3110047P20Rik	Sup	0.183	0.183
Vis	AllReggenelistsL2only	71281764	AI851790	Sup	0.116	0.116
Vis	AllReggenelistsL2only	76135481	Arg2	No peak	0.580	0.580
Vis	AllReggenelistsL2only	69530702	C030003D03Rik	Deep	0.743	0.743
Vis	AllReggenelistsL2only	69540302	Camk1d	Deep	0.928	0.928
Vis	AllReggenelistsL2only	75694246	Capsl	No peak	0.477	0.477
Vis	AllReggenelistsL2only	2078	Cbr3	No peak	0.483	0.483
Vis	AllReggenelistsL2only	69540677	Cdh23	No peak	nan	NaN
Vis	AllReggenelistsL2only	70919740	Clgn	Deep	0.960	0.960
Vis	AllReggenelistsL2only	2100	Cmtm3	No peak	nan	NaN
Vis	AllReggenelistsL2only	74578317	Cntn5	Sup	0.203	0.203
Vis	AllReggenelistsL2only	75197606	Cpa6	No peak	0.448	NaN
Vis	AllReggenelistsL2only	74579932	Cpne4	No peak	0.466	0.466
Vis	AllReggenelistsL2only	70429321	Cyb5r1	Deep	0.625	0.625
Vis	AllReggenelistsL2only	69671654	Dusp4	No peak	0.526	0.526
Vis	AllReggenelistsL2only	74357596	Eif1b	No peak	0.462	NaN
Vis	AllReggenelistsL2only	68499195	Eml3	Sup	0.300	0.300
Vis	AllReggenelistsL2only	68798663	Entpd4	Sup	0.388	0.388
Vis	AllReggenelistsL2only	631728	Fabp5	No peak	0.503	NaN
Vis	AllReggenelistsL2only	70231158	Fstl4	Sup	0.237	0.237
Vis	AllReggenelistsL2only	70545937	Glrx	No peak	0.585	0.585
Vis	AllReggenelistsL2only	70276951	Gpc5	No peak	nan	NaN
Vis	AllReggenelistsL2only	79913276	Gpr101	No peak	0.000	NaN
Vis	AllReggenelistsL2only	74431661	Gucy1a2	Sup	0.284	0.284
Vis	AllReggenelistsL2only	2288	Hes3	Sup	0.396	0.396
Vis	AllReggenelistsL2only	69059927	Hmgn3	No peak	nan	NaN
Vis	AllReggenelistsL2only	69735389	Il1rapl2	No peak	0.442	0.442
Vis	AllReggenelistsL2only	68196916	Ipo11	No peak	0.579	0.579
Vis	AllReggenelistsL2only	77924520	Itga4	Sup	0.144	0.144
Vis	AllReggenelistsL2only	71529965	Kcna4	Sup	0.327	0.327
Vis	AllReggenelistsL2only	1755	Kcnab2	Deep	0.685	0.685
Vis	AllReggenelistsL2only	69736010	Lamb1-1	Deep	0.619	0.619
Vis	AllReggenelistsL2only	77464846	Lef1	No peak	0.541	0.541
Vis	AllReggenelistsL2only	79677363	Lhx2	Sup	0.338	0.338
Vis	AllReggenelistsL2only	644	Lix1	No peak	0.129	NaN
Vis	AllReggenelistsL2only	69173244	Lrrn1	No peak	0.511	0.511
Vis	AllReggenelistsL2only	71809385	Megf11	No peak	0.296	NaN
Vis	AllReggenelistsL2only	71494629	Mum1l1	No peak	0.529	NaN
Vis	AllReggenelistsL2only	294041	Mylip	No peak	0.446	0.446
Vis	AllReggenelistsL2only	70919083	Nefl	No peak	0.477	0.477
Vis	AllReggenelistsL2only	71668991	Palmd	Sup	0.202	0.202
Vis	AllReggenelistsL2only	70437834	Pcdh20	Sup	0.076	0.076
Vis	AllReggenelistsL2only	69783286	Plau	No peak	0.599	NaN
Vis	AllReggenelistsL2only	69014518	Prcp	Sup	0.310	0.310
Vis	AllReggenelistsL2only	69013603	Prkab2	No peak	0.586	0.586
Vis	AllReggenelistsL2only	79913320	Prkca	Sup	0.364	0.364
Vis	AllReggenelistsL2only	71920507	Rasd2	Sup	0.170	0.170
Vis	AllReggenelistsL2only	69818000	Rasgrp2	Deep	0.621	0.621
Vis	AllReggenelistsL2only	69169714	Scamp1	No peak	0.483	0.483
Vis	AllReggenelistsL2only	67936387	Sh3bgrl2	No peak	0.360	NaN
Vis	AllReggenelistsL2only	69873720	Sh3pxd2a	Sup	0.170	0.170
Vis	AllReggenelistsL2only	74562606	TC1563501	Deep	0.834	0.834
Vis	AllReggenelistsL2only	69734446	Tmem132e	No peak	0.599	0.599
Vis	AllReggenelistsL2only	71616334	Trabd	No peak	0.539	0.539
Vis	AllReggenelistsL2only	73497666	Zdhhc23	No peak	0.581	0.581
Vis	AllReggenelistsL2only	69407152	Zfp533	No peak	0.586	0.586
Vis	AllReggenelistsL3only	74581199	1700024P16Rik	Deep	0.729	0.729
Vis	AllReggenelistsL3only	69443148	4933409K07Rik	Deep	0.620	0.620
Vis	AllReggenelistsL3only	69835645	8030451F13Rik	Sup	0.198	0.198
Vis	AllReggenelistsL3only	71892334	9030624G23Rik	No peak	0.461	0.461
Vis	AllReggenelistsL3only	69447846	9930013L23Rik	No peak	0.444	0.444
Vis	AllReggenelistsL3only	71211722	Ajap1	Sup	0.237	0.237
Vis	AllReggenelistsL3only	69526934	Atp10a	No peak	0.539	0.539
Vis	AllReggenelistsL3only	79750677	Fgfr1	No peak	0.448	0.448
Vis	AllReggenelistsL3only	467	Fzd3	Sup	0.112	0.112
Vis	AllReggenelistsL3only	71656914	Gpr12	Sup	0.374	0.374
Vis	AllReggenelistsL3only	77464884	Hgf	No peak	0.562	0.562
Vis	AllReggenelistsL3only	617	Kitl	No peak	0.361	NaN
Vis	AllReggenelistsL3only	70786667	LOC433697	No peak	0.546	0.546
Vis	AllReggenelistsL3only	70300595	Ntng1	Deep	0.701	0.701
Vis	AllReggenelistsL3only	70528342	Plch1	No peak	nan	NaN
Vis	AllReggenelistsL3only	68445119	Plod2	No peak	0.443	0.443
Vis	AllReggenelistsL3only	69028605	Ppl	Sup	0.043	0.043
Vis	AllReggenelistsL3only	2532	Rgs4	Sup	0.348	0.348
Vis	AllReggenelistsL3only	70595931	Sec14l3	No peak	0.410	NaN
Vis	AllReggenelistsL3only	74431576	Slc4a7	No peak	0.389	NaN
Vis	AllReggenelistsL3only	2698	Trps1	No peak	0.213	NaN
Vis	AllReggenelistsL3only	70302956	Ust	Sup	0.368	0.368
Vis	AllReggenelistsL3only	71377947	Wdr16	Sup	0.037	0.037
Vis	AllReggenelistsL5only	74509572	Adam33	Sup	0.020	0.980
Vis	AllReggenelistsL5only	69526815	Arhgap25	Deep	0.948	0.052
Vis	AllReggenelistsL5only	69527800	B230220E17Rik	Deep	0.868	0.132
Vis	AllReggenelistsL5only	70611407	B230220E17Rik	Deep	0.921	0.079
Vis	AllReggenelistsL5only	77620431	B830045N13Rik	Sup	0.369	0.631
Vis	AllReggenelistsL5only	69531097	C630035N08Rik	Deep	0.806	0.194
Vis	AllReggenelistsL5only	71021160	Cobll1	No peak	0.625	NaN
Vis	AllReggenelistsL5only	69568836	Col12a1	Deep	0.875	0.125
Vis	AllReggenelistsL5only	74821660	Col5a1	Deep	0.883	0.117
Vis	AllReggenelistsL5only	68795395	Cplx3	Deep	0.872	0.128
Vis	AllReggenelistsL5only	68844498	D130067I03Rik	No peak	nan	NaN
Vis	AllReggenelistsL5only	71587595	Dpysl5	Deep	0.626	0.374
Vis	AllReggenelistsL5only	70919573	Etv1	Deep	0.653	0.347
Vis	AllReggenelistsL5only	68844839	Fezf2	No peak	0.545	0.455
Vis	AllReggenelistsL5only	69288998	Foxp1	No peak	0.503	0.497
Vis	AllReggenelistsL5only	70595913	Frmpd4	Deep	0.838	0.162
Vis	AllReggenelistsL5only	71587739	Glra2	No peak	nan	NaN
Vis	AllReggenelistsL5only	79913274	Grp	Deep	0.708	0.292
Vis	AllReggenelistsL5only	68845813	Jup	Deep	0.904	0.096
Vis	AllReggenelistsL5only	70725459	LOC384670	Deep	0.994	0.006
Vis	AllReggenelistsL5only	77620828	Lefty2	No peak	0.506	0.494
Vis	AllReggenelistsL5only	70546081	Lrp1b	Deep	0.713	0.287
Vis	AllReggenelistsL5only	69671732	Lypd6	Deep	0.983	0.017
Vis	AllReggenelistsL5only	77455013	Myom1	Deep	0.698	0.302
Vis	AllReggenelistsL5only	71234703	Nxph4	Deep	0.676	0.324
Vis	AllReggenelistsL5only	77910649	Pcsk5	Deep	0.681	0.319
Vis	AllReggenelistsL5only	68631869	Prss12	Deep	0.919	0.081
Vis	AllReggenelistsL5only	69816757	Rai14	Deep	0.998	0.002
Vis	AllReggenelistsL5only	68545545	Rprm	Deep	0.824	0.176
Vis	AllReggenelistsL5only	69873475	Sdk2	Deep	0.861	0.139
Vis	AllReggenelistsL5only	74822606	Sp3	Deep	0.633	0.367
Vis	AllReggenelistsL5only	70795748	TC1460681	Deep	0.946	0.054
Vis	AllReggenelistsL5only	70795772	TC1461568	Deep	0.966	0.034
Vis	AllReggenelistsL5only	76098295	Tmem40	No peak	0.553	0.447
Vis	AllReggenelistsL5only	68151385	Trib2	Sup	0.241	0.759
Vis	AllReggenelistsL5only	69817121	Tshz3	No peak	0.559	0.441
SS	AllReggenelistsL2only	532676	2310047O13Rik	Sup	0.293	0.293
SS	AllReggenelistsL2only	67765705	2810439F02Rik	Deep	0.627	0.627
SS	AllReggenelistsL2only	70203658	3110047P20Rik	Sup	0.179	0.179
SS	AllReggenelistsL2only	71281764	AI851790	Sup	0.165	0.165
SS	AllReggenelistsL2only	76135481	Arg2	Sup	0.394	0.394
SS	AllReggenelistsL2only	69530702	C030003D03Rik	Deep	0.744	0.744
SS	AllReggenelistsL2only	69540302	Camk1d	No peak	0.225	NaN
SS	AllReggenelistsL2only	75694246	Capsl	No peak	0.414	0.414
SS	AllReggenelistsL2only	2078	Cbr3	No peak	0.463	0.463
SS	AllReggenelistsL2only	69540677	Cdh23	No peak	nan	NaN
SS	AllReggenelistsL2only	70919740	Clgn	Deep	0.706	0.706
SS	AllReggenelistsL2only	2100	Cmtm3	No peak	nan	NaN
SS	AllReggenelistsL2only	74578317	Cntn5	Sup	0.296	0.296
SS	AllReggenelistsL2only	75197606	Cpa6	No peak	0.579	NaN
SS	AllReggenelistsL2only	74579932	Cpne4	Deep	0.857	0.857
SS	AllReggenelistsL2only	70429321	Cyb5r1	No peak	0.602	NaN
SS	AllReggenelistsL2only	69671654	Dusp4	Deep	0.633	0.633
SS	AllReggenelistsL2only	74357596	Eif1b	No peak	0.533	0.533
SS	AllReggenelistsL2only	68499195	Eml3	No peak	0.447	0.447
SS	AllReggenelistsL2only	68798663	Entpd4	No peak	0.574	0.574
SS	AllReggenelistsL2only	631728	Fabp5	No peak	0.416	0.416
SS	AllReggenelistsL2only	70231158	Fstl4	Sup	0.284	0.284
SS	AllReggenelistsL2only	70545937	Glrx	Deep	0.673	0.673
SS	AllReggenelistsL2only	70276951	Gpc5	No peak	0.000	NaN
SS	AllReggenelistsL2only	79913276	Gpr101	Deep	0.613	0.613
SS	AllReggenelistsL2only	74431661	Gucy1a2	Sup	0.269	0.269
SS	AllReggenelistsL2only	2288	Hes3	No peak	0.425	0.425
SS	AllReggenelistsL2only	69059927	Hmgn3	No peak	nan	NaN
SS	AllReggenelistsL2only	69735389	Il1rapl2	No peak	0.479	0.479
SS	AllReggenelistsL2only	68196916	Ipo11	Deep	0.679	0.679
SS	AllReggenelistsL2only	77924520	Itga4	Sup	0.367	0.367
SS	AllReggenelistsL2only	71529965	Kcna4	No peak	0.239	NaN
SS	AllReggenelistsL2only	1755	Kcnab2	No peak	0.583	0.583
SS	AllReggenelistsL2only	69736010	Lamb1-1	No peak	0.650	NaN
SS	AllReggenelistsL2only	77464846	Lef1	No peak	0.458	0.458
SS	AllReggenelistsL2only	79677363	Lhx2	Sup	0.340	0.340
SS	AllReggenelistsL2only	644	Lix1	Sup	0.159	0.159
SS	AllReggenelistsL2only	69173244	Lrrn1	No peak	0.574	0.574
SS	AllReggenelistsL2only	71809385	Megf11	No peak	0.180	NaN
SS	AllReggenelistsL2only	71494629	Mum1l1	No peak	0.290	NaN
SS	AllReggenelistsL2only	294041	Mylip	Sup	0.392	0.392
SS	AllReggenelistsL2only	70919083	Nefl	No peak	0.494	0.494
SS	AllReggenelistsL2only	71668991	Palmd	Sup	0.054	0.054
SS	AllReggenelistsL2only	70437834	Pcdh20	Sup	0.092	0.092
SS	AllReggenelistsL2only	69783286	Plau	No peak	0.746	NaN
SS	AllReggenelistsL2only	69014518	Prcp	No peak	0.375	NaN
SS	AllReggenelistsL2only	69013603	Prkab2	No peak	0.589	0.589
SS	AllReggenelistsL2only	79913320	Prkca	Sup	0.301	0.301
SS	AllReggenelistsL2only	71920507	Rasd2	Sup	0.318	0.318
SS	AllReggenelistsL2only	69818000	Rasgrp2	No peak	0.546	0.546
SS	AllReggenelistsL2only	69169714	Scamp1	No peak	0.502	0.502
SS	AllReggenelistsL2only	67936387	Sh3bgrl2	No peak	0.530	0.530
SS	AllReggenelistsL2only	69873720	Sh3pxd2a	Sup	0.098	0.098
SS	AllReggenelistsL2only	74562606	TC1563501	Deep	0.791	0.791
SS	AllReggenelistsL2only	69734446	Tmem132e	No peak	0.463	0.463
SS	AllReggenelistsL2only	71616334	Trabd	No peak	0.495	0.495
SS	AllReggenelistsL2only	73497666	Zdhhc23	Sup	0.319	0.319
SS	AllReggenelistsL2only	69407152	Zfp533	No peak	0.546	0.546
SS	AllReggenelistsL3only	74581199	1700024P16Rik	Sup	0.250	0.250
SS	AllReggenelistsL3only	69443148	4933409K07Rik	No peak	0.466	0.466
SS	AllReggenelistsL3only	69835645	8030451F13Rik	No peak	0.536	0.536
SS	AllReggenelistsL3only	71892334	9030624G23Rik	Sup	0.393	0.393
SS	AllReggenelistsL3only	69447846	9930013L23Rik	No peak	0.470	0.470
SS	AllReggenelistsL3only	71211722	Ajap1	Sup	0.164	0.164
SS	AllReggenelistsL3only	69526934	Atp10a	Deep	0.823	0.823
SS	AllReggenelistsL3only	79750677	Fgfr1	No peak	0.546	0.546
SS	AllReggenelistsL3only	467	Fzd3	Sup	0.201	0.201
SS	AllReggenelistsL3only	71656914	Gpr12	Sup	0.233	0.233
SS	AllReggenelistsL3only	77464884	Hgf	No peak	0.511	0.511
SS	AllReggenelistsL3only	617	Kitl	Sup	0.044	0.044
SS	AllReggenelistsL3only	70786667	LOC433697	No peak	0.458	0.458
SS	AllReggenelistsL3only	70300595	Ntng1	Deep	0.682	0.682
SS	AllReggenelistsL3only	70528342	Plch1	Sup	0.000	0.000
SS	AllReggenelistsL3only	68445119	Plod2	No peak	0.483	0.483
SS	AllReggenelistsL3only	69028605	Ppl	No peak	0.459	0.459
SS	AllReggenelistsL3only	2532	Rgs4	Sup	0.295	0.295
SS	AllReggenelistsL3only	70595931	Sec14l3	No peak	0.550	NaN
SS	AllReggenelistsL3only	74431576	Slc4a7	No peak	0.565	NaN
SS	AllReggenelistsL3only	2698	Trps1	Sup	0.317	0.317
SS	AllReggenelistsL3only	70302956	Ust	No peak	0.413	0.413
SS	AllReggenelistsL3only	71377947	Wdr16	No peak	0.357	NaN
SS	AllReggenelistsL5only	74509572	Adam33	Sup	0.064	0.936
SS	AllReggenelistsL5only	69526815	Arhgap25	Deep	0.931	0.069
SS	AllReggenelistsL5only	69527800	B230220E17Rik	Deep	0.838	0.162
SS	AllReggenelistsL5only	70611407	B230220E17Rik	Deep	0.803	0.197
SS	AllReggenelistsL5only	77620431	B830045N13Rik	No peak	0.510	0.490
SS	AllReggenelistsL5only	69531097	C630035N08Rik	Deep	0.838	0.162
SS	AllReggenelistsL5only	71021160	Cobll1	No peak	0.347	NaN
SS	AllReggenelistsL5only	69568836	Col12a1	Deep	0.904	0.096
SS	AllReggenelistsL5only	74821660	Col5a1	Deep	0.652	0.348
SS	AllReggenelistsL5only	68795395	Cplx3	Deep	0.941	0.059
SS	AllReggenelistsL5only	68844498	D130067I03Rik	No peak	nan	NaN
SS	AllReggenelistsL5only	71587595	Dpysl5	No peak	0.441	0.559
SS	AllReggenelistsL5only	70919573	Etv1	Deep	0.702	0.298
SS	AllReggenelistsL5only	68844839	Fezf2	No peak	0.539	0.461
SS	AllReggenelistsL5only	69288998	Foxp1	No peak	0.475	0.525
SS	AllReggenelistsL5only	70595913	Frmpd4	Deep	0.891	0.109
SS	AllReggenelistsL5only	71587739	Glra2	No peak	nan	NaN
SS	AllReggenelistsL5only	79913274	Grp	No peak	0.571	0.429
SS	AllReggenelistsL5only	68845813	Jup	Deep	0.895	0.105
SS	AllReggenelistsL5only	70725459	LOC384670	Deep	0.976	0.024
SS	AllReggenelistsL5only	77620828	Lefty2	No peak	0.462	0.538
SS	AllReggenelistsL5only	70546081	Lrp1b	Deep	0.681	0.319
SS	AllReggenelistsL5only	69671732	Lypd6	Deep	0.961	0.039
SS	AllReggenelistsL5only	77455013	Myom1	No peak	0.597	0.403
SS	AllReggenelistsL5only	71234703	Nxph4	Deep	0.748	0.252
SS	AllReggenelistsL5only	77910649	Pcsk5	No peak	0.566	0.434
SS	AllReggenelistsL5only	68631869	Prss12	Deep	0.810	0.190
SS	AllReggenelistsL5only	69816757	Rai14	Deep	0.984	0.016
SS	AllReggenelistsL5only	68545545	Rprm	Deep	0.803	0.197
SS	AllReggenelistsL5only	69873475	Sdk2	Deep	0.890	0.110
SS	AllReggenelistsL5only	74822606	Sp3	No peak	0.523	0.477
SS	AllReggenelistsL5only	70795748	TC1460681	Deep	0.965	0.035
SS	AllReggenelistsL5only	70795772	TC1461568	Deep	0.888	0.112
SS	AllReggenelistsL5only	76098295	Tmem40	No peak	0.556	0.444
SS	AllReggenelistsL5only	68151385	Trib2	Sup	0.377	0.623
SS	AllReggenelistsL5only	69817121	Tshz3	No peak	0.550	0.450

## Sheet: GroupSummary
Region	Genelist	Deep	Sup	No peak	Noexp
MECw	AllReggenelistsL2only	0.0	0.931034482759	0.0	0.0689655172414
MECw	AllReggenelistsL3only	0.0434782608696	0.695652173913	0.260869565217	0.0
MECw	AllReggenelistsL5only	0.944444444444	0.0	0.0	0.0555555555556
Vis	AllReggenelistsL2only	0.155172413793	0.310344827586	0.310344827586	0.224137931034
Vis	AllReggenelistsL3only	0.130434782609	0.347826086957	0.304347826087	0.217391304348
Vis	AllReggenelistsL5only	0.694444444444	0.0833333333333	0.138888888889	0.0833333333333
SS	AllReggenelistsL2only	0.155172413793	0.293103448276	0.327586206897	0.224137931034
SS	AllReggenelistsL3only	0.0869565217391	0.391304347826	0.391304347826	0.130434782609
SS	AllReggenelistsL5only	0.555555555556	0.0555555555556	0.305555555556	0.0833333333333

## Sheet: AllGeneCorrelations
Region1	Region2	r	p	Gradient	Intercept	Standard error
MECLII	MECLII	1.000	0.000	1.000	0.000	0.000
MECLII	MECLIII	0.967	0.000	1.131	-0.273	0.002
MECLII	MECLV	0.947	0.000	1.104	-0.101	0.003
MECLII	VisLII\&III	0.923	0.000	1.179	0.821	0.004
MECLII	VisLIV	0.909	0.000	1.379	0.910	0.005
MECLII	VisLV	0.932	0.000	1.121	0.404	0.003
MECLII	VisLVIa	0.946	0.000	1.175	0.411	0.003
MECLII	SSLII\&III	0.911	0.000	1.379	1.597	0.005
MECLII	SSLIV	0.910	0.000	1.053	0.203	0.004
MECLII	SSLV	0.937	0.000	0.956	1.030	0.003
MECLII	SSLVIa	0.936	0.000	1.054	0.238	0.003
MECLIII	MECLII	0.967	0.000	0.826	0.883	0.002
MECLIII	MECLIII	1.000	0.000	1.000	0.000	0.000
MECLIII	MECLV	0.957	0.000	0.953	0.418	0.002
MECLIII	VisLII&III	0.917	0.000	1.001	1.562	0.003
MECLIII	VisLIV	0.914	0.000	1.186	1.610	0.004
MECLIII	VisLV	0.940	0.000	0.966	0.950	0.003
MECLIII	VisLVIa	0.949	0.000	1.008	1.036	0.003
MECLIII	SSLII&III	0.909	0.000	1.176	2.406	0.004
MECLIII	SSLIV	0.916	0.000	0.905	0.745	0.003
MECLIII	SSLV	0.934	0.000	0.815	1.593	0.002
MECLIII	SSLVIa	0.937	0.000	0.901	0.834	0.003
MECLV	MECLII	0.947	0.000	0.813	1.117	0.002
MECLV	MECLIII	0.957	0.000	0.961	0.536	0.002
MECLV	MECLV	1.000	0.000	1.000	0.000	0.000
MECLV	VisLII\&III	0.917	0.000	1.005	1.628	0.003
MECLV	VisLIV	0.913	0.000	1.189	1.702	0.004
MECLV	VisLV	0.935	0.000	0.964	1.064	0.003
MECLV	VisLVIa	0.963	0.000	1.026	0.938	0.002
MECLV	SSLII\&III	0.905	0.000	1.176	2.528	0.004
MECLV	SSLIV	0.914	0.000	0.906	0.818	0.003
MECLV	SSLV	0.926	0.000	0.811	1.723	0.003
MECLV	SSLVIa	0.950	0.000	0.918	0.741	0.002
VisLII&III	MECLII	0.923	0.000	0.723	0.887	0.002
VisLII&III	MECLIII	0.917	0.000	0.841	0.443	0.003
VisLII&III	MECLV	0.917	0.000	0.837	0.389	0.003
VisLII&III	VisLII&III	1.000	0.000	1.000	0.000	0.000
VisLII&III	VisLIV	0.961	0.000	1.141	0.303	0.003
VisLII&III	VisLV	0.947	0.000	0.892	0.361	0.002
VisLII&III	VisLVIa	0.949	0.000	0.924	0.516	0.002
VisLII&III	SSLII\&III	0.962	0.000	1.140	1.002	0.003
VisLII&III	SSLIV	0.935	0.000	0.846	0.061	0.003
VisLII&III	SSLV	0.928	0.000	0.742	1.236	0.002
VisLII&III	SSLVIa	0.936	0.000	0.825	0.374	0.002
VisLIV	MECLII	0.909	0.000	0.599	1.207	0.002
VisLIV	MECLIII	0.914	0.000	0.705	0.683	0.002
VisLIV	MECLV	0.913	0.000	0.701	0.638	0.002
VisLIV	VisLII\&III	0.961	0.000	0.809	0.733	0.002
VisLIV	VisLIV	1.000	0.000	1.000	0.000	0.000
VisLIV	VisLV	0.970	0.000	0.769	0.315	0.002
VisLIV	VisLVIa	0.954	0.000	0.781	0.681	0.002
VisLIV	SSLII\&III	0.973	0.000	0.971	1.116	0.002
VisLIV	SSLIV	0.964	0.000	0.734	-0.060	0.002
VisLIV	SSLV	0.930	0.000	0.625	1.402	0.002
VisLIV	SSLVIa	0.934	0.000	0.693	0.599	0.002
VisLV	MECLII	0.932	0.000	0.775	1.012	0.002
VisLV	MECLIII	0.940	0.000	0.914	0.430	0.003
VisLV	MECLV	0.935	0.000	0.906	0.426	0.003
VisLV	VisLII\&III	0.947	0.000	1.006	0.937	0.003
VisLV	VisLIV	0.970	0.000	1.224	0.493	0.002
VisLV	VisLV	1.000	0.000	1.000	0.000	0.000
VisLV	VisLVIa	0.971	0.000	1.003	0.516	0.002
VisLV	SSLII\&III	0.949	0.000	1.194	1.518	0.003
VisLV	SSLIV	0.962	0.000	0.925	-0.008	0.002
VisLV	SSLV	0.962	0.000	0.816	1.113	0.002
VisLV	SSLVIa	0.949	0.000	0.888	0.472	0.002
VisLVIa	MECLII	0.946	0.000	0.761	0.751	0.002
VisLVIa	MECLIII	0.949	0.000	0.894	0.174	0.002
VisLVIa	MECLV	0.963	0.000	0.903	-0.041	0.002
VisLVIa	VisLII\&III	0.949	0.000	0.975	0.751	0.003
VisLVIa	VisLIV	0.954	0.000	1.165	0.529	0.003
VisLVIa	VisLV	0.971	0.000	0.940	0.182	0.002
VisLVIa	VisLVIa	1.000	0.000	1.000	0.000	0.000
VisLVIa	SSLII\&III	0.949	0.000	1.156	1.325	0.003
VisLVIa	SSLIV	0.949	0.000	0.883	-0.005	0.002
VisLVIa	SSLV	0.965	0.000	0.792	0.956	0.002
VisLVIa	SSLVIa	0.980	0.000	0.888	-0.019	0.001
SSLII\&III	MECLII	0.911	0.000	0.602	0.749	0.002
SSLII\&III	MECLIII	0.909	0.000	0.703	0.234	0.003
SSLII\&III	MECLV	0.905	0.000	0.697	0.217	0.003
SSLII\&III	VisLII\&III	0.962	0.000	0.812	0.125	0.002
SSLII\&III	VisLIV	0.973	0.000	0.976	-0.313	0.002
SSLII\&III	VisLV	0.949	0.000	0.754	0.010	0.002
SSLII\&III	VisLVIa	0.949	0.000	0.780	0.177	0.002
SSLII\&III	SSLII\&III	1.000	0.000	1.000	0.000	0.000
SSLII\&III	SSLIV	0.971	0.000	0.742	-0.684	0.001
SSLII\&III	SSLV	0.951	0.000	0.642	0.722	0.002
SSLII\&III	SSLVIa	0.952	0.000	0.708	-0.105	0.002
SSLIV	MECLII	0.910	0.000	0.787	1.559	0.003
SSLIV	MECLIII	0.916	0.000	0.927	1.105	0.003
SSLIV	MECLV	0.914	0.000	0.921	1.061	0.003
SSLIV	VisLII\&III	0.935	0.000	1.032	1.543	0.003
SSLIV	VisLIV	0.964	0.000	1.265	1.131	0.003
SSLIV	VisLV	0.962	0.000	1.001	0.875	0.002
SSLIV	VisLVIa	0.949	0.000	1.020	1.226	0.003
SSLIV	SSLII\&III	0.971	0.000	1.271	1.743	0.002
SSLIV	SSLIV	1.000	0.000	1.000	0.000	0.000
SSLIV	SSLV	0.962	0.000	0.849	1.477	0.002
SSLIV	SSLVIa	0.960	0.000	0.935	0.756	0.002
SSLV	MECLII	0.937	0.000	0.918	0.288	0.003
SSLV	MECLIII	0.934	0.000	1.072	-0.301	0.003
SSLV	MECLV	0.926	0.000	1.058	-0.256	0.003
SSLV	VisLII\&III	0.928	0.000	1.162	0.316	0.004
SSLV	VisLIV	0.930	0.000	1.383	0.063	0.004
SSLV	VisLV	0.962	0.000	1.134	-0.393	0.003
SSLV	VisLVIa	0.965	0.000	1.175	-0.272	0.003
SSLV	SSLII\&III	0.951	0.000	1.411	0.444	0.004
SSLV	SSLIV	0.962	0.000	1.091	-0.815	0.002
SSLV	SSLV	1.000	0.000	1.000	0.000	0.000
SSLV	SSLVIa	0.976	0.000	1.077	-0.614	0.002
SSLVIa	MECLII	0.936	0.000	0.832	1.040	0.002
SSLVIa	MECLIII	0.937	0.000	0.973	0.551	0.003
SSLVIa	MECLV	0.950	0.000	0.984	0.334	0.003
SSLVIa	VisLII\&III	0.936	0.000	1.062	1.168	0.003
SSLVIa	VisLIV	0.934	0.000	1.259	1.131	0.004
SSLVIa	VisLV	0.949	0.000	1.013	0.688	0.003
SSLVIa	VisLVIa	0.980	0.000	1.082	0.501	0.002
SSLVIa	SSLII\&III	0.952	0.000	1.279	1.596	0.003
SSLVIa	SSLIV	0.960	0.000	0.986	0.106	0.002
SSLVIa	SSLV	0.976	0.000	0.884	1.058	0.002
SSLVIa	SSLVIa	1.000	0.000	1.000	0.000	0.000

## Sheet: SSRawhistdata
Region	Genelist	Iseries	D0	D1	D2	D3	D4	D5	D6	D7	D8	D9	D10	D11	D12	D13	D14	D15	D16	D17	D18	D19
MECw	ABASSL23	I75695669	14.20221	20.71186	36.84537	59.76521	62.11739	58.97725	53.65345	38.99023	36.17738	40.33627	41.88114	43.06650	41.56920	43.28193	49.89523	60.94521	59.67384	35.45724	9.96184	1.81155
MECw	ABASSL23	I294039	18.27819	16.70621	13.96388	22.93187	21.07609	26.53584	20.54813	14.57509	15.61863	17.50055	17.56229	19.76286	26.37165	42.06329	41.57974	35.55666	28.72367	17.82326	8.24242	4.43161
MECw	ABASSL23	I68196937	0.03431	0.13220	0.50451	0.86253	3.51739	8.69056	13.30691	14.22833	16.57095	20.47299	18.47086	18.88080	14.25670	12.21979	12.24680	4.55791	0.37939	0.23489	0.00000	0.00000
MECw	ABASSL23	I532610	27.02083	20.12542	33.11287	38.85523	36.19130	40.42662	41.27860	40.96215	30.97783	32.81477	28.35314	32.44793	35.12500	34.74453	44.91385	51.10710	39.70442	21.10718	6.05275	3.40881
MECw	ABASSL23	I73818841	0.16544	0.87345	1.37359	0.46837	0.14130	0.39704	0.12231	0.17827	0.86142	1.32194	0.81143	0.10038	0.13058	1.04258	1.54831	0.75467	0.65459	0.03877	0.00000	0.00000
MECw	ABASSL23	I72081795	0.04534	0.72768	0.07111	0.06934	1.00652	0.22981	0.03624	0.00000	0.00000	0.00000	0.00000	0.00000	0.00000	0.00000	0.00000	0.00000	0.00000	0.00000	0.00000	0.00000
MECw	ABASSL23	I71574383	0.00000	0.00791	0.00451	0.00000	0.14783	0.38567	1.11665	0.28571	0.16186	0.82139	2.26286	0.71895	0.19643	0.36709	1.57276	0.63263	0.51755	0.00798	0.00000	0.00000
MECw	ABASSL23	I69526564	0.00000	0.05424	0.39052	0.38078	0.05000	0.00114	0.00000	0.00000	0.00000	0.00000	0.23657	0.69762	0.13728	0.00000	0.00000	0.00000	0.00000	0.00000	0.00000	0.05927
MECw	ABASSL23	I69449020	0.54902	1.43616	7.38713	11.10341	16.05543	11.52560	8.25821	4.28938	5.32705	8.83572	10.97829	10.42535	11.98884	15.71001	16.85797	13.42217	11.85051	9.16990	3.31201	1.56839
MECw	ABASSL23	I68910955	38.59559	46.68588	69.75395	81.20316	72.07609	85.55973	73.66365	64.74847	45.21951	61.07938	62.43657	61.67378	57.83929	61.13003	66.20489	81.95890	65.24462	38.84036	10.18070	4.50912
MECw	ABASSL23	I69015811	43.45098	58.72655	76.56998	70.00122	70.24130	57.08646	45.33749	49.98046	60.38692	57.12018	64.86743	67.78168	66.42076	67.70426	60.32945	64.60149	42.22650	30.98062	8.78114	1.04407
MECw	ABASSL23	I71580186	0.00000	0.00000	0.00000	0.00000	0.00000	0.00000	0.00000	0.00000	0.00000	0.00000	0.00000	0.00000	0.00000	0.00000	0.00000	0.00000	0.00000	0.00000	0.00000	0.00000
MECw	ABASSL23	I70238794	1.16054	2.89040	3.65688	4.39538	7.56087	8.38225	1.99887	0.96825	1.22062	1.92723	3.15314	7.30991	7.98772	10.63291	12.74389	20.30884	16.00906	4.30103	0.58025	0.41793
MECw	ABASSL23	I587416	1.52083	2.80339	2.72799	3.43187	4.76630	4.18316	4.13364	4.77289	6.97783	4.90077	6.32114	6.16437	2.87054	2.50518	4.10710	6.90785	10.63307	10.00456	1.75533	0.26140
MECw	ABASSL23	I73606485	7.66176	16.95367	30.10609	33.18613	30.28913	21.26507	14.80634	7.60928	6.96674	10.29768	10.35429	15.69134	15.28571	26.73303	37.87544	49.27148	36.74179	19.46066	7.82941	15.06079
MECw	ABASSL23	I1610	13.16054	17.98644	19.83070	20.07299	16.96630	17.24118	17.34202	17.45177	18.83814	19.75854	17.33371	13.98243	15.78906	18.72727	19.93015	19.81320	12.69649	8.32725	3.65657	2.84650
MECw	ABASSL23	I70231158	0.00000	0.06893	1.87359	1.02920	0.58804	0.25939	0.18347	0.05128	0.03548	0.00000	0.61600	7.90590	25.27790	31.88493	29.34575	17.72727	5.13024	0.54162	0.08193	0.00304
MECw	ABASSL23	I1731	0.00000	0.00000	0.00000	0.00000	0.00000	0.00000	0.00000	0.00000	0.00000	0.00000	0.00000	0.00000	0.00000	0.00000	0.00000	0.02864	0.23669	0.02623	0.03928	0.03951
MECw	ABASSL23	I74357593	36.38603	60.44068	79.87923	76.42457	68.64348	59.36291	59.75085	47.19658	46.95233	42.14884	46.79200	48.12798	43.10491	55.89298	73.75669	75.77335	62.18800	43.40479	7.58137	2.28571
MECw	ABASSL23	I69735156	0.05515	0.34576	0.40632	0.42822	1.85435	0.57793	0.04757	0.11844	0.90022	1.25689	0.39771	0.59598	0.66183	0.91484	0.25844	0.60274	0.31370	0.00000	0.00000	0.00000
MECw	ABASSL23	I68861816	9.79412	15.98192	15.85214	20.08516	17.13804	19.42435	15.08041	7.59219	10.38137	12.89526	10.09600	16.12673	21.86719	41.89873	54.11641	54.17684	41.80294	18.22805	4.83614	2.30699
MECw	ABASSL23	I70303701	0.28431	1.10395	1.11061	1.68613	1.23804	1.70307	1.92865	1.34188	2.90355	7.02977	14.72571	20.09787	18.73772	19.75029	11.78347	10.53176	2.89015	2.69669	7.49607	7.97568
MECw	ABASSL23	I71210172	0.00000	0.00000	0.00000	0.00000	0.00000	0.00000	0.00000	0.00000	0.00000	0.00000	0.00000	0.00000	0.00000	0.00000	0.00000	0.07472	0.18913	1.72406	1.30415	0.37234
MECw	ABASSL23	I69782706	12.60662	18.96949	32.73363	31.10462	45.15761	53.01365	60.43941	67.88034	88.04545	91.32525	86.09257	86.09787	91.98772	87.51323	81.33411	65.23163	48.26840	27.80046	14.20875	4.67325
MECw	ABASSL23	I68269267	0.00000	0.29492	0.09932	0.02555	0.00000	0.00228	0.07701	0.21734	1.61419	1.77067	3.27657	3.39398	3.93192	2.55466	5.55180	4.83935	2.17894	0.38198	0.00000	0.00000
MECw	ABASSL23	I77464848	39.87990	61.33672	76.18510	90.56934	88.85978	85.80887	84.96489	71.36630	76.68958	94.79162	89.42057	91.75282	83.60379	94.54200	107.55064	118.09465	115.64326	72.72064	31.64759	7.49240
MECw	ABASSL23	I824	36.95343	57.97401	64.22686	66.93674	70.94565	72.09784	55.84258	57.20513	60.00665	68.35061	64.05829	63.58344	70.04241	74.76640	71.89173	67.79452	66.95583	41.79247	25.72278	13.86018
MECw	ABASSL23	I77620427	4.53922	8.43842	18.10497	18.75791	23.09457	20.43117	18.93658	15.06838	13.61308	15.05513	13.53257	13.69385	15.24665	14.50058	12.71013	13.37983	11.02945	6.75713	2.16947	0.34802
MECw	ABASSL23	I2698	2.52696	2.06554	1.75282	1.97324	2.79457	5.98407	8.96942	16.86935	21.57206	46.94157	45.31771	34.26223	31.99330	15.36824	11.20140	6.41843	3.73839	2.48119	1.94613	1.44833
MECw	ABASSL23	I80514159	9.48407	11.93785	21.82280	34.58881	37.97935	42.35267	53.61268	63.09890	67.91131	66.99008	62.77829	55.20828	47.59152	38.12428	36.79627	25.01121	11.17554	4.20639	0.90685	0.05927
MECw	ABASSL23	I67792190	0.19608	0.04294	0.00000	0.00000	0.00000	0.00228	0.03058	0.02686	0.00998	0.00000	0.00000	0.00000	0.00000	0.00000	0.07334	2.15193	1.50736	0.04789	0.01122	0.00000
MECw	ABASSL4	I72182948	0.83088	0.94124	1.23363	0.57664	0.46848	3.00000	1.70781	1.31868	0.83481	0.20728	0.38171	0.96738	0.37612	0.26122	0.09313	0.03611	0.00227	0.08780	0.55331	0.08359
MECw	ABASSL4	I70305401	17.14461	17.61921	44.08465	104.51946	126.34783	135.18771	100.20045	57.55189	37.50443	25.80265	30.02743	25.02509	28.30804	21.77560	24.07334	19.28269	8.67157	10.01026	4.52076	2.85714
MECw	ABASSL4	I70305443	0.54657	0.52655	0.93228	0.65572	0.47174	1.08987	1.79615	3.55189	5.49335	5.13892	5.36343	4.00125	4.40290	7.01266	5.83586	7.58904	6.17327	3.00570	2.73064	0.72644
MECw	ABASSL4	I68442871	4.68873	6.20452	11.06659	12.72384	11.56739	8.92833	8.82446	7.25275	7.60421	7.69901	13.15314	12.04391	11.37835	11.49712	16.86962	13.33873	11.25821	2.41961	0.39394	0.12158
MECw	ABASSL4	I68191348	0.00000	0.00000	0.00000	0.00000	0.00000	0.00000	0.00000	0.00000	0.00000	0.00000	0.00000	0.00000	0.00000	0.00000	0.00000	0.00000	0.00000	0.22121	1.31762	0.08663
MECw	ABASSL4	I68744815	11.91667	20.79435	40.58352	58.35036	50.00543	42.76906	33.53114	22.81197	22.96341	22.78060	20.36114	19.21205	23.12500	34.90564	44.86845	48.28892	37.91733	16.21323	5.89562	7.48632
MECw	ABASSL4	I70305478	5.67525	6.01130	8.74492	9.57908	27.17065	42.83618	43.42129	47.16484	45.19290	44.58545	42.55429	48.13802	51.94420	46.83199	32.20140	35.23661	30.99547	22.81528	8.61279	1.56231
MECw	ABASSL5	I67787340	25.18015	29.01130	41.98081	37.06448	30.82174	42.76678	42.84032	44.54823	43.60643	47.01323	41.79314	51.93225	58.19978	66.71577	57.61118	49.54172	29.38279	17.23261	5.17845	5.58207
MECw	ABASSL5	I70218733	2.73284	6.00904	6.14221	3.43796	2.56413	3.87144	1.20045	0.25275	0.00000	0.00000	0.00000	0.00000	0.00000	0.00000	0.00000	0.03113	0.04304	0.02965	0.05612	0.44225
MECw	ABASSL5	I70228711	0.00000	0.00000	0.00000	0.00000	0.00000	0.00000	0.00000	0.12332	2.27938	0.27674	0.00343	0.00000	0.00000	0.00000	0.00000	0.00000	0.00000	0.00000	0.00000	0.00000
MECw	ABASSL5	I76003369	5.62623	6.96610	11.29345	11.21776	8.86522	10.88510	10.28199	9.91331	9.38914	10.26351	10.00114	11.53325	10.00000	11.28999	9.09662	8.54919	4.33862	2.09464	2.78788	7.27812
MECw	ABASSL5	I71656693	1.78676	5.67571	8.79120	14.44647	23.53587	30.48919	26.41676	14.36264	8.54656	12.39030	11.31886	12.16311	12.79353	9.03222	17.09313	29.41719	23.26501	10.04105	1.54209	0.16565
MECw	ABASSL5	I75694270	0.45711	1.23503	1.04966	1.91363	2.74565	3.77588	3.06002	2.72527	2.92794	2.00662	2.68000	2.79799	3.64844	3.81933	3.46566	3.03611	2.50963	1.36032	2.34231	11.27356
MECw	ABASSL5	I68191372	0.00000	0.00000	0.00000	0.00000	0.00000	0.00000	0.00000	0.00000	0.00000	0.00000	0.00000	0.00000	0.00000	0.00000	0.00000	0.00000	0.00000	0.00000	0.00000	0.00000
MECw	ABASSL5	I69526725	21.94485	32.77853	44.72573	46.24574	45.72826	51.93174	48.61948	45.90354	38.97118	48.15325	42.98971	48.66499	45.33371	51.87917	67.13504	62.00125	45.82559	26.52680	2.88328	1.13070
MECw	ABASSL5	I70230987	0.00000	0.04972	0.29684	0.30292	0.00000	0.00000	0.00000	0.00000	0.00000	0.00992	0.18971	1.01255	2.57924	3.60875	4.14785	4.06476	0.82220	0.07640	0.00112	0.00000
MECw	ABASSL5	I71281301	10.33088	12.79661	14.60497	10.53893	12.28587	19.13083	18.70215	18.51648	19.89690	26.05623	26.77943	25.19824	19.45536	17.64327	16.43423	14.19178	8.63420	6.05473	4.03030	0.60030
MECw	ABASSL5	I71495831	0.00000	0.00000	0.00000	0.00000	0.00000	0.05233	0.44054	2.26984	3.43126	3.44101	3.20800	3.74404	3.56696	4.09781	1.94412	1.97260	2.69309	1.71152	0.00112	0.00000
MECw	ABASSL5	I72739	34.77451	35.03729	29.55418	28.20195	30.40543	28.64619	40.47565	38.14652	40.68625	42.40022	46.84686	43.21330	44.34487	39.46720	48.51455	51.63761	56.92752	39.23945	16.12907	10.41337
MECw	ABASSL5	I69530702	0.00000	0.00000	0.00000	0.00000	0.00000	0.00000	0.00000	0.00000	0.00000	0.13561	0.35886	0.50314	0.03906	0.00000	0.08033	0.56912	1.83239	2.92588	1.29405	0.29787
MECw	ABASSL5	I643550	0.06373	0.39661	0.12867	0.04623	0.29783	0.73379	1.37712	0.56532	0.36918	1.93826	3.32914	1.47804	0.73549	2.79287	4.91967	4.82316	6.19932	2.02851	0.26263	0.00000
MECw	ABASSL5	I69548834	8.26471	6.50282	9.79797	11.03650	10.13478	10.37429	10.28879	11.38095	12.14745	16.70232	27.27200	26.30238	26.68304	25.78136	22.22235	13.30137	3.95130	0.81300	0.00224	0.00000
MECw	ABASSL5	I176780	47.79657	45.58418	50.65688	38.13869	40.77174	40.55518	51.61835	56.66545	55.90355	60.66262	61.98171	60.95107	64.64174	60.97008	61.69732	53.77584	38.38732	18.06613	9.72278	4.51216
MECw	ABASSL5	I70429321	0.41544	0.23955	0.17269	0.75426	2.20217	0.21160	0.03398	0.00000	0.00000	0.00000	0.07771	0.40025	1.45647	1.44649	1.83469	5.01494	2.03398	1.19612	0.13917	0.05775
MECw	ABASSL5	I385776	0.00000	0.00000	0.00000	0.00000	0.01196	0.00114	0.13024	3.84493	4.81929	2.00221	0.89943	1.25094	1.42746	0.00000	0.06636	0.79328	4.58664	0.35804	0.08530	0.03647
MECw	ABASSL5	I75693034	1.04412	1.82825	1.88149	1.26521	1.01304	0.92264	1.02492	2.10623	3.79712	7.27894	8.98286	7.72146	8.75558	9.95167	9.11758	7.68867	7.02492	3.61003	2.51403	0.75532
MECw	ABASSL5	I75259495	9.09314	8.86102	9.33521	10.73844	12.55000	11.68259	13.16195	12.43346	16.29268	15.64388	16.55086	14.91217	15.35379	16.49367	17.89406	19.84558	16.90713	8.06043	2.87542	2.54863
MECw	ABASSL5	I631726	0.00613	0.02712	0.24718	1.01460	3.89891	2.41752	1.55266	3.72894	1.91131	0.99338	2.82857	4.27478	2.15737	2.45339	5.50757	3.49066	1.52322	1.15165	0.15376	0.03495
MECw	ABASSL5	I70528617	0.00245	0.00565	0.07223	0.14112	0.30435	0.06143	0.04417	0.00366	0.00333	0.01874	0.05829	0.82183	0.20089	0.03567	0.00000	0.00000	0.00000	0.00000	0.02581	0.08815
MECw	ABASSL5	I71280670	1.25000	0.23164	3.07675	0.74818	0.20543	0.00000	0.00000	0.00000	0.00000	0.04520	0.11886	0.42284	0.71317	0.59264	0.08615	0.00000	0.00000	0.00000	0.00000	0.00000
MECw	ABASSL5	I68844839	37.76348	30.03390	36.76524	46.24453	47.54674	32.72924	20.53794	6.82540	3.77827	2.57883	2.06286	3.90464	3.12500	3.05984	6.01048	3.36613	2.53681	2.46408	3.16386	3.38602
MECw	ABASSL5	I70593139	0.00123	0.00000	0.00000	0.00000	0.00543	0.10466	0.55606	1.75824	0.45565	0.14112	0.05143	0.71895	1.38058	0.79747	0.42026	0.02491	0.16648	2.13113	0.15264	0.00000
MECw	ABASSL5	I75750310	4.05882	6.38418	14.56433	14.04988	13.42065	12.93402	13.32390	14.54945	11.18514	13.15436	16.01829	12.93726	13.64397	13.80322	12.57159	11.46326	9.83239	4.35234	2.67116	2.88602
MECw	ABASSL5	I76081883	2.02574	4.11751	4.68849	5.87835	5.94783	5.66212	4.66818	7.00611	9.17184	7.47519	7.87657	7.33877	6.30915	8.57192	10.62864	8.00498	7.51755	4.50627	1.91695	1.32979
MECw	ABASSL5	I74003393	29.86029	16.62599	2.32957	0.21898	0.26087	1.41752	4.36693	5.20879	3.06874	0.32856	0.16686	0.87202	2.93415	3.17952	0.49825	0.18929	0.80521	1.35918	0.93042	0.82979
MECw	ABASSL5	I74579938	6.49755	5.96045	7.86569	11.80900	12.08261	22.52218	23.58550	24.02442	18.75610	17.14002	15.14057	23.39147	43.98884	53.18067	65.05239	47.78082	17.82106	3.52908	0.99102	0.61094
MECw	ABASSL5	I79360237	1.64338	3.49605	6.81716	6.63747	7.38261	8.79295	6.34088	3.72527	4.35920	4.73870	4.17371	4.16311	5.21763	2.67434	1.81956	0.82441	0.69875	1.08666	0.78002	0.21277
MECw	ABASSL5	I2316	0.10907	0.98531	1.73589	1.79440	0.70435	0.66098	0.67271	1.50916	1.53215	0.85777	1.99200	2.26976	1.80804	3.15420	5.06868	2.79826	2.23216	0.80388	0.14590	0.13222
MECw	ABASSL5	I71232830	0.12868	0.14802	0.79684	0.60949	0.13913	0.01024	0.00000	0.00000	0.00000	0.00000	0.01600	0.07152	0.06585	0.06214	1.33877	0.23786	0.35221	0.11973	0.06734	0.00000
MECw	ABASSL5	I71610855	14.57475	25.30395	32.78442	27.38808	25.49130	25.17975	30.34088	24.21490	26.10643	26.15877	31.03543	33.10540	30.93750	31.11853	41.45518	42.91656	28.38618	11.27480	3.01010	3.17933
MECw	ABASSL5	I69671684	0.00000	0.00000	0.02032	0.67032	0.28804	0.90102	1.11212	0.49206	0.05100	0.00000	0.00000	0.00000	0.00000	0.00000	0.00466	0.00000	0.02039	0.54276	0.15152	0.07447
MECw	ABASSL5	I71489812	0.00000	0.02938	0.20655	1.34307	3.43370	4.82139	8.48698	2.53968	0.51552	0.46196	0.01714	0.00000	0.00000	0.00000	0.00000	0.00000	0.00000	0.00000	0.00000	0.00000
MECw	ABASSL5	I72283695	20.04902	22.95028	44.58465	47.18978	39.96848	49.62230	46.81540	51.48718	52.80266	47.88754	57.01714	56.05019	66.08036	57.34983	57.73690	85.31880	67.29445	36.17446	8.28732	4.37994
MECw	ABASSL5	I69736436	3.06373	1.31864	4.48307	9.46229	16.43152	19.02503	14.34541	12.83639	12.56319	14.01213	16.90971	16.70891	11.78795	11.93441	21.91269	21.16687	12.14496	8.31585	1.34007	0.06687
MECw	ABASSL5	I69752167	3.37745	1.53107	0.14108	0.17640	1.87065	1.59841	0.78029	0.88400	0.31707	0.24035	0.46171	1.10289	0.71652	0.78596	1.76251	2.73474	1.36353	0.72178	0.23345	0.76292
MECw	ABASSL5	I294041	1.11152	0.63164	1.49210	2.94282	5.32500	7.87600	3.69875	1.32357	0.68847	1.76185	2.43429	9.61104	12.51786	16.76640	20.11874	17.75716	9.24575	3.64652	2.67003	0.83435
MECw	ABASSL5	I70546287	9.16054	10.83164	16.17043	16.57908	17.35109	16.31286	16.95923	15.63736	7.23503	5.64939	9.37029	8.41531	9.92746	13.07250	16.79278	21.70361	14.24802	5.93957	2.11223	1.48024
MECw	ABASSL5	I69236748	0.07230	0.05424	0.20316	1.39294	2.65326	3.09556	1.50057	0.65446	0.07539	0.01323	0.00000	0.00000	0.00000	0.00000	0.01048	0.05729	0.65912	0.42987	1.76207	0.46353
MECw	ABASSL5	I70610412	0.00000	0.00000	0.00000	0.00000	0.00000	0.00000	0.00000	0.00000	0.01109	0.11025	0.45371	0.08030	0.03125	0.00000	0.00000	0.00000	0.00000	0.00000	0.00000	0.00000
MECw	ABASSL5	I69258220	0.00000	0.00000	0.00000	0.00000	0.00000	0.00000	0.00000	0.00000	0.00000	0.00551	0.07086	0.08281	0.95871	1.93326	1.50175	0.02864	0.00000	0.00000	0.00000	0.06839
MECw	ABASSL5	I71210577	4.90931	9.00565	13.81490	14.19951	21.06304	44.66098	43.98867	49.41758	53.94678	49.82800	50.52114	48.15935	38.57924	30.34638	19.41793	12.54919	9.68630	7.88369	5.01010	3.96353
MECw	ABASSL5	I70429154	0.03676	0.00000	0.04515	0.14964	0.62826	2.44027	2.97735	3.59829	0.74390	0.36384	0.45029	0.39774	0.14509	0.58343	4.12456	6.93898	4.25934	1.54048	0.21549	0.03647
MECw	ABASSL5	I71662897	1.86152	2.32542	1.79797	0.52798	1.46848	2.10694	1.90940	1.12821	0.50776	0.84344	0.81829	1.43789	2.22656	5.84005	7.24214	6.34371	9.34994	3.44584	1.38721	0.53647
MECw	ABASSL5	I71664132	0.57353	0.40678	1.49323	0.50852	1.23913	0.89306	1.29105	1.33455	1.02328	1.35281	2.74971	1.43789	0.69866	0.86881	3.05821	5.45330	1.92978	0.92360	0.73401	0.48632
MECw	ABASSL5	I69817432	14.22426	14.45650	21.61061	25.63139	23.51196	23.89420	23.89807	25.40171	28.37029	31.17310	38.11086	29.19322	30.06250	33.33257	33.55530	26.10710	24.19932	19.16648	13.32548	2.65805
MECw	ABASSL5	I69818000	0.47917	0.41582	0.25508	0.72384	1.35652	1.94994	0.74632	0.48840	1.79601	1.74642	2.96000	1.92597	3.69420	11.17606	26.21653	20.57908	10.53454	4.69441	0.48934	0.08663
MECw	ABASSL5	I72001864	10.90686	15.83616	17.09594	10.88200	5.65435	7.12287	7.35334	9.44689	8.00111	1.16869	0.00457	0.00502	0.00223	0.11507	1.20140	1.50809	1.33069	1.90308	0.79686	0.23860
MECw	ABASSL5	I940	4.94363	5.98983	6.67494	5.58637	4.22609	3.80091	2.49264	1.71062	2.78492	1.84234	2.07314	3.95734	7.84598	3.88723	3.52037	6.16812	0.85504	1.67503	2.53423	1.93921
MECw	ABASSL5	I69013314	0.00000	0.00000	0.00000	0.00000	0.00000	0.00000	0.00000	0.00000	0.00000	0.00000	0.00000	0.00000	0.00000	0.00000	0.00000	0.00000	0.00000	0.00000	0.00000	0.00000
MECw	ABASSL5	I71724696	0.62500	0.08927	0.01129	0.00000	0.00000	0.00341	0.01133	0.01221	0.49889	1.34179	1.44571	0.94228	0.19308	0.16916	0.60419	2.75841	2.84938	2.33523	0.48934	0.10030
MECw	ABASSL5	I68193019	38.84191	50.87684	62.35214	67.45985	59.92391	70.70421	69.08720	65.82418	64.89690	73.24807	67.50629	75.04391	93.40625	81.66053	78.61467	70.92653	42.43262	15.63740	5.45567	3.34043
MECw	ABASSL5	I71488819	0.00000	0.00000	0.15914	0.61436	1.56739	0.17179	0.12458	0.02320	0.00222	0.60198	0.46286	0.12422	0.00781	0.00000	0.00000	0.00000	0.00000	0.00000	0.00000	0.00000
MECw	ABASSL5	I69887529	0.00000	0.00000	0.00000	0.00000	0.00000	0.00000	0.00000	0.00000	0.00000	0.00000	0.00000	0.00000	0.00000	0.00000	0.00000	0.00000	0.00000	0.16534	1.97306	0.68085
MECw	ABASSL5	I70793947	0.04044	0.34576	0.22912	0.10341	0.30000	0.09101	0.05663	1.41880	1.09867	1.36494	0.87543	1.07026	0.46540	0.56847	0.20605	0.20672	0.71234	0.88483	0.05051	0.01064
MECw	ABASSL5	I69980208	1.02451	1.95028	0.81038	0.35645	1.28261	1.85210	0.92186	0.75824	1.40244	0.26902	0.99086	0.83312	0.93638	4.10127	5.89639	5.30511	1.46659	0.16990	0.03030	0.00000
MECw	ABASSL5	I69981085	4.64216	4.32316	8.83409	8.73114	15.39783	17.21957	19.71687	18.66422	16.94124	20.24366	22.52571	17.45295	16.33147	27.31300	40.31315	45.04234	40.07475	25.17218	5.24130	1.21581
MECw	ABASSL5	I68203444	13.91912	22.55819	32.45711	31.14112	28.54239	39.08760	40.50057	39.33822	37.51330	43.63175	41.75200	41.87453	42.05580	35.01841	41.94645	59.68244	43.73726	24.49487	4.88440	0.84043
MECw	ABASSL5	I68203484	1.72794	1.33898	2.77991	1.20438	3.05326	4.16382	3.13137	1.79609	2.93237	1.47630	0.58171	2.64115	5.89955	7.96893	11.52386	15.08717	5.45187	0.49487	0.00000	0.00000
MECw	ABASSL5	I75750439	9.82598	15.96723	31.98984	40.33577	48.60978	38.37884	31.90940	19.93651	14.92239	15.00441	13.84800	15.14680	16.72545	16.35903	21.49360	35.65255	28.16308	17.01596	4.64759	2.46809
MECw	ABASSL5	I71280676	0.45833	0.59322	1.18623	3.76886	6.45435	3.92947	3.41789	3.01221	2.84368	3.46968	1.92800	2.61606	3.55804	3.64442	6.90221	8.13699	2.58890	0.58267	0.00000	0.00000
MECw	ABASSL6	I70230975	1.49632	7.49266	20.03499	23.40024	12.17174	8.87713	2.10985	0.20147	0.00000	0.00000	0.01371	0.47051	2.90513	7.57422	13.64261	4.54047	1.07814	1.17218	0.06734	0.00000
MECw	ABASSL6	I80474700	9.68995	10.02599	9.30135	10.22019	7.12283	8.16496	9.65345	11.74237	10.60532	9.97464	8.61714	8.88331	10.25558	12.18527	14.04307	9.07223	6.92412	8.20410	5.50617	4.71125
MECw	ABASSL6	I68410285	12.13971	13.16610	15.46050	15.73114	17.15978	18.63140	14.31484	15.76435	15.76608	11.97905	15.28571	13.55583	12.54353	9.27618	10.37602	13.09714	5.79615	5.87457	7.81930	3.69149
MECw	ABASSL6	I69672605	0.21078	0.18757	0.04176	0.01095	0.19891	0.98407	0.46206	0.09524	0.00776	0.00000	0.00000	0.00000	0.06138	0.85731	1.60070	2.35243	0.89921	0.10376	0.00112	0.00000
MECw	ABASSL6	I70431325	0.00000	0.12203	0.41535	1.01825	1.22609	0.31172	0.60249	0.09158	0.18514	0.35722	0.43086	1.39272	1.04911	1.13119	1.52969	1.57285	1.18347	0.83238	1.41414	0.13222
MECw	ABASSL6	I76098396	16.74755	21.59774	25.20767	26.10341	28.68370	25.44824	25.30578	26.35043	23.38803	21.93495	27.02743	24.95985	24.55804	23.08516	21.05239	21.00000	15.73273	15.31813	7.32435	5.29483
MECw	ABASSL6	I1364	0.00000	0.03955	0.32957	0.29684	3.81196	8.39363	6.34315	0.79487	0.06652	0.00221	0.00000	0.00000	0.00000	0.00000	0.00000	0.07347	0.15176	0.89396	0.10887	0.00000
MECw	ABASSL6	I68300920	0.00000	0.00000	0.00000	0.00000	0.00000	0.00000	0.00000	0.04151	0.55765	0.50496	0.00914	0.00000	0.07478	2.25086	4.59371	1.15816	0.37826	1.51311	0.12570	0.19605
MECw	ABASSL6	I559	0.04412	0.15254	2.65576	0.20195	0.03587	0.05233	0.04530	0.00733	0.13304	1.42227	0.81143	0.51568	0.08371	0.00000	0.00000	0.05604	0.96942	0.46522	0.00000	0.00000
MECw	ABASSL6	I70303707	0.64828	0.14689	0.13657	0.25304	0.99239	1.48805	0.61382	0.14164	0.00887	0.00000	0.00000	0.24592	0.31473	0.14269	0.62747	0.29514	0.07928	0.32497	0.44332	2.87842
MECw	ABASSL6	I69671732	3.31250	7.16158	6.75056	4.48905	3.32391	2.61092	1.92865	0.88156	0.15078	0.76075	0.20229	0.08156	0.53125	0.25777	0.00000	0.00000	0.00000	0.00000	0.00000	0.00000
MECw	ABASSL6	I68744624	0.56127	0.81130	2.46953	3.22993	1.20326	0.78612	0.54360	1.09890	1.18625	0.35502	0.27886	1.15809	1.53125	3.18757	2.45402	1.30511	1.61495	0.15507	0.00337	0.03040
MECw	ABASSL6	I77800939	29.96691	36.73559	51.71445	53.23114	55.32717	47.81684	33.97282	27.58608	21.32373	27.79493	25.13829	25.36136	21.25000	28.46375	24.03609	26.55293	18.48584	14.26226	9.30976	9.16413
MECw	ABASSL6	I583869	0.00000	0.02825	0.40068	0.23601	0.06739	0.01138	0.00000	0.00000	0.00000	0.00000	0.00000	0.00000	0.00000	0.00000	0.00000	0.00000	0.00000	0.00000	0.00000	0.00000
MECw	ABASSL6	I68545545	14.80025	31.79096	71.95485	115.50973	124.91196	78.82253	35.87203	3.79976	2.14523	1.69350	1.33257	1.03262	1.20871	1.92750	3.51572	3.83188	3.28539	2.18244	3.28058	0.39058
MECw	ABASSL6	I67979027	0.00000	0.00000	0.00000	0.00000	0.00000	0.00000	0.00453	0.47741	0.90909	2.12900	5.44000	4.07026	4.63839	3.79977	4.34342	5.04359	4.91053	0.57697	0.04938	0.00000
MECw	ABASSL6b	I71789970	18.29289	35.53446	51.96388	67.07421	52.67935	48.22071	39.75991	33.02808	21.63082	10.81808	10.58857	13.93601	13.71763	17.69620	23.58556	26.98755	21.77237	11.94983	7.46240	2.70061
MECw	ABASSL6b	I69514410	1.65074	5.50960	4.25395	1.79805	1.90109	1.77929	2.97848	2.83883	1.41685	1.54465	1.02171	1.39021	1.94308	1.88493	4.22468	6.32628	5.81653	3.66249	0.70370	0.20821
MECw	ABASSL6b	I70723343	0.00000	0.00000	0.00000	0.03163	0.10000	0.50398	0.08947	0.00000	0.00000	0.00000	0.00000	0.00376	0.04464	0.06674	0.01863	0.00000	0.00000	0.00000	0.00000	0.00000
MECw	ABASSL6b	I69526934	0.36765	1.05085	3.86230	6.58151	9.44457	9.71900	13.86976	21.08303	21.52993	25.62404	30.45029	30.16186	27.18973	16.32796	14.16531	4.24533	0.78482	0.22691	0.22110	1.01368
MECw	ABASSL6b	I68157389	24.65319	35.52994	44.96163	37.86618	23.97609	26.59954	25.42129	15.77289	7.87029	3.57883	4.24914	3.63237	4.61049	4.08285	8.43073	7.81694	6.15855	4.83694	0.59708	1.10486
MECw	ABASSL6b	I69530917	0.34559	2.12655	3.58239	1.33577	2.28913	2.78043	1.71801	1.50916	0.42905	0.57993	2.19886	2.17315	1.34263	1.49942	0.33760	0.52428	0.38732	0.96123	0.20763	0.04407
MECw	ABASSL6b	I68795395	13.86275	12.66893	18.82619	36.07786	10.30652	6.38908	7.91619	6.89011	1.25610	0.07497	0.00000	0.00000	0.00000	0.00000	0.00000	0.00000	0.00000	0.41505	0.11785	0.01368
MECw	ABASSL6b	I68920656	22.68015	29.76158	31.89616	25.02433	22.00978	20.41752	20.47112	18.43712	13.39468	14.05182	15.14400	12.12798	13.80915	12.78711	11.39930	11.04608	6.52322	4.12543	7.27048	4.60486
MECw	ABASSL6b	I69734560	0.82353	0.89040	1.03386	1.17640	0.13478	0.00000	0.01019	0.00000	0.37805	0.47299	0.44914	0.57465	0.04018	0.01036	0.00000	0.00000	0.00000	0.00798	0.24916	1.25228
MECw	ABASSL6b	I68919886	0.23775	2.27797	1.15011	0.77616	0.11957	0.00000	0.00453	0.00488	0.01330	0.08379	0.52914	0.62359	1.68527	5.70426	11.96624	5.31880	2.71121	0.40935	0.01684	0.00000
MECw	ABASSL6b	I68845813	3.42157	3.46780	3.00113	9.57664	8.98913	4.67235	0.56059	0.15140	0.03548	0.10364	0.38971	0.50439	0.36496	0.15995	0.04773	0.00000	0.00000	0.00000	0.00000	0.01368
MECw	ABASSL6b	I75198208	11.71569	7.02486	4.02032	3.42336	2.94130	3.32309	4.46093	6.00488	9.74501	14.94708	14.48114	14.07277	15.61384	11.46030	4.30966	0.75965	1.01812	0.43330	0.15825	0.08207
MECw	ABASSL6b	I71570739	0.09436	0.18079	0.42664	0.32725	0.34891	0.11718	0.03398	0.00000	0.00000	0.00000	0.00000	0.00000	0.00558	0.11853	0.90454	1.45579	0.49377	0.04903	0.00112	0.00000
MECw	ABASSL6b	I70919059	8.51961	13.26215	26.80135	39.09489	41.46413	40.66098	34.10646	21.39805	16.67627	9.11687	10.13257	9.03764	12.85268	10.46490	8.56345	9.74720	10.98754	7.10718	4.22447	2.97264
MECw	ABASSL6b	I71234703	44.14951	37.02825	26.93905	7.98418	2.00978	1.59272	0.88675	0.66056	0.06763	0.04851	0.20800	0.60979	0.11272	0.00000	0.09430	0.51557	0.37259	0.00570	0.07969	0.22188
MECw	ABASSL6b	I68077018	0.00000	0.00000	0.00000	0.75547	0.79565	0.09670	0.02265	0.01954	0.25610	0.65711	0.24571	0.00000	0.00781	0.06214	0.27474	0.77210	0.14723	0.00000	0.00000	0.00000
MECw	ABASSL6b	I69816757	21.08088	24.64294	34.17494	27.77494	10.97609	2.69625	3.67724	2.33455	0.61419	0.06505	0.00000	0.00000	0.00000	0.00000	0.00000	0.00000	0.00000	0.00000	0.00000	0.00000
MECw	ABASSL6b	I954	0.00000	0.00000	0.00000	0.00000	0.04022	0.07395	0.20385	0.02686	0.00000	0.00000	0.15771	0.45922	0.04911	0.00000	0.00000	0.00374	0.11212	0.34094	0.13131	0.50304
MECw	ABASSL6b	I69873839	43.22672	55.76384	79.86005	72.20073	58.70870	52.78271	47.21971	33.65812	42.89800	48.71444	42.37371	39.39021	53.76674	64.76870	64.52503	67.70486	63.40430	50.46180	30.16723	45.09119
MECw	ABASSL6b	I69262284	45.75735	48.82712	61.99436	61.37835	51.16087	43.71900	52.45640	47.65079	50.24169	50.68357	53.62629	50.04893	42.67411	38.34292	40.76950	33.75342	32.44621	28.75941	18.46914	7.39666
MECw	ABASSL6b	I70795772	8.14338	15.85424	21.27765	25.07056	14.90652	9.72924	5.71234	4.92918	1.15521	0.81367	0.53943	1.07528	0.60491	1.31530	0.82887	0.13699	0.07248	0.16534	0.62738	1.02736
MECw	ABASSL6b	I80473469	5.45833	4.36723	4.80700	2.57299	1.15326	1.06826	0.84145	1.23565	0.58537	0.66924	0.15657	0.35257	0.17188	0.08861	0.22817	0.82067	0.25028	0.37058	0.34568	0.40881
MECw	ABASSL6b	I76098295	11.54779	13.59774	11.32619	7.25304	5.73261	9.36064	6.87429	4.43223	4.69401	4.14884	2.79086	2.31117	2.11830	2.29574	3.63446	3.97385	3.40997	1.64082	0.93042	1.37690
MECw	ABASSL6b	I70445275	0.06005	0.17175	0.23363	0.50852	1.34130	1.36974	0.97169	1.18437	0.93681	0.28997	0.32000	0.72647	0.58594	1.18872	1.70431	1.60523	1.24915	2.93273	3.82155	8.06839
SS	ABASSL23	I75695669	46.81726	57.51305	60.99097	65.28583	67.15626	59.76141	47.20420	35.54520	37.51525	39.76230	38.62156	42.29152	48.81083	58.15958	66.89318	75.42499	90.47317	93.69175	92.10293	33.51970
SS	ABASSL23	I294039	12.38690	18.29611	25.61822	36.98949	37.93556	30.54376	20.21529	17.29658	22.47234	22.37189	21.57893	12.26691	11.85196	13.31109	25.63088	47.23604	56.23364	59.20991	56.77114	26.71353
SS	ABASSL23	I68196937	0.59464	0.32863	0.33464	1.06231	1.57162	4.43123	3.85093	2.02784	3.76732	4.70774	3.14226	2.40176	1.72836	1.84003	2.11725	4.41284	7.43566	9.25642	12.60185	5.23008
SS	ABASSL23	I532610	25.73869	27.89431	25.66929	28.03972	32.13556	27.79081	27.53851	20.60254	21.14090	21.54384	17.32639	12.18557	15.99267	22.06729	26.62393	39.27858	49.42220	55.63184	39.36852	7.88932
SS	ABASSL23	I73818841	0.99881	0.59093	1.23763	2.07438	5.59499	6.97330	8.63302	9.64939	13.38547	16.56917	17.17621	16.59503	16.44431	19.97039	27.64478	43.93676	56.56030	68.67738	55.44614	16.84466
SS	ABASSL23	I72081795	0.00000	0.07018	0.77808	0.03972	0.00000	0.00000	0.00000	0.00000	0.00000	0.00000	0.00000	0.00000	0.00000	0.00000	0.00000	0.00342	0.12969	0.08687	0.00000	0.00000
SS	ABASSL23	I71574383	2.04048	3.05691	3.81932	3.65732	3.59199	2.54647	1.90578	1.80871	1.80920	2.92547	1.18711	0.47303	0.57157	1.54009	3.23011	5.89290	11.25181	9.57339	5.39892	1.12256
SS	ABASSL23	I69526564	0.00000	0.00000	0.00000	0.00000	0.02304	0.17776	0.00000	0.00000	0.00517	0.32489	0.30657	0.61087	0.32967	0.01480	0.09713	0.30460	1.07384	2.24221	3.00910	0.92301
SS	ABASSL23	I69449020	1.81786	1.72614	2.30676	2.94743	3.20000	2.76884	2.43874	2.49118	3.42399	3.36970	4.83222	1.52911	0.96437	0.26629	1.00457	5.55260	12.71657	21.94171	33.03580	16.31880
SS	ABASSL23	I68910955	83.05714	102.55884	97.58955	95.88162	93.58664	97.05509	101.12952	98.21472	95.66960	89.73941	87.24337	88.13977	74.38444	68.97558	77.22096	85.53057	99.54096	109.08284	115.42485	88.43699
SS	ABASSL23	I69015811	88.30417	89.66581	97.57895	93.75896	97.67713	101.06658	98.14498	66.10695	44.06515	44.55553	50.06196	41.85017	43.71655	54.85945	68.57838	85.28712	98.98806	118.26885	121.15062	50.19669
SS	ABASSL23	I71580186	0.63095	0.20154	0.00000	0.00000	0.00000	0.00000	0.00000	0.00000	0.00000	0.07379	0.08302	0.31721	0.66952	0.68122	1.97238	6.78921	12.55828	7.76231	3.27500	0.44586
SS	ABASSL23	I70238794	1.53988	3.22507	5.10094	5.73520	6.53189	5.75803	3.22870	1.79272	1.87952	2.56040	2.13011	2.96447	4.32498	6.05345	7.84507	13.71041	22.50210	24.83320	18.68966	3.35729
SS	ABASSL23	I587416	10.25714	15.81943	19.90456	21.83372	20.39666	15.41467	13.93349	10.64443	8.92761	11.97662	14.96952	17.05629	18.18489	17.89617	23.91312	40.64128	54.59378	65.57533	64.46281	31.49789
SS	ABASSL23	I73606485	30.29286	40.27386	43.59387	52.76480	54.36160	43.83035	34.07905	26.56395	31.58118	33.08451	29.72714	20.31914	21.59051	35.82946	46.68648	64.02165	79.45315	92.93751	59.39676	9.60316
SS	ABASSL23	I1610	9.85298	8.69320	9.86567	8.75117	8.27613	5.49916	7.18407	6.84564	5.15951	4.18972	3.43767	4.75920	7.16147	10.08114	15.88184	23.78504	30.06829	34.66672	45.66127	21.80060
SS	ABASSL23	I70231158	1.51429	2.96106	1.98940	6.23676	5.79633	4.36566	6.47287	6.51213	6.78723	14.17730	16.16481	12.41674	7.88780	7.36608	11.74794	25.41872	28.29840	28.58389	29.35031	7.36617
SS	ABASSL23	I1731	0.00000	0.00000	0.00000	0.00000	0.00000	0.00000	0.00000	0.00000	0.00517	0.08013	0.00273	0.00000	0.00000	0.00000	0.00000	0.00000	0.03970	0.00565	0.10725	0.37564
SS	ABASSL23	I74357593	46.99167	57.75738	70.78358	72.36449	74.38197	75.69990	64.45041	49.73842	49.21794	53.24062	54.12912	39.23288	41.08410	49.31417	51.19791	71.72826	85.03902	94.63636	104.50648	65.26015
SS	ABASSL23	I69735156	0.00000	0.00000	0.00000	0.16667	0.04541	0.02467	0.46704	1.31643	1.16210	0.95251	1.23594	1.49551	1.21421	1.31955	2.91641	3.86517	3.70900	1.47699	0.39259	0.15609
SS	ABASSL23	I68861816	9.78571	11.25546	11.04242	11.80413	14.44140	11.35924	11.89527	13.23374	12.59281	13.36581	10.45626	9.94842	10.15394	11.89579	12.93854	19.16065	26.47334	38.93267	53.33534	28.44226
SS	ABASSL23	I70303701	2.84940	5.74925	7.93087	11.37461	12.55826	14.42007	10.26575	8.03004	4.94002	5.63225	7.39455	7.53425	7.47913	9.97289	13.44558	19.83517	25.19765	25.21282	27.89614	12.83098
SS	ABASSL23	I71210172	0.31012	0.22379	0.00000	0.14447	0.07813	0.64211	0.90753	1.21114	2.39297	1.15806	0.23916	0.42851	0.39829	1.29225	4.18292	6.79092	4.86510	2.75182	1.62531	0.36060
SS	ABASSL23	I69782706	14.25774	20.45914	26.71445	36.19470	38.91753	38.22406	32.24300	27.99559	28.04576	25.56868	23.98439	19.34867	19.28426	27.01500	38.81416	62.07824	84.62254	94.42839	70.75108	13.47398
SS	ABASSL23	I68269267	0.00000	0.00000	0.01375	0.26129	0.24608	0.20716	1.37427	2.16510	1.79757	4.25329	2.57770	1.18643	0.67074	2.55105	4.73002	13.56115	22.51018	31.20297	32.80540	10.70977
SS	ABASSL23	I77464848	82.08810	75.23064	80.29419	88.32165	91.42137	94.09598	91.00700	74.36742	65.78878	72.72358	75.61338	73.35424	84.32967	88.75101	96.89190	104.94721	114.31876	127.03439	131.82901	60.41534
SS	ABASSL23	I824	32.70179	40.43004	41.83464	42.67601	43.92755	40.54174	42.20012	38.27426	40.70062	40.50974	38.31227	41.30137	37.71594	37.69948	46.03402	54.42860	57.77090	64.38398	65.02562	30.92992
SS	ABASSL23	I77620427	11.47798	12.71844	14.67125	18.95327	18.28180	20.78709	22.30426	20.70149	14.52870	17.45933	16.92813	14.95441	16.15089	21.23303	24.99634	35.80630	41.32834	39.89472	34.40833	11.54195
SS	ABASSL23	I2698	0.00357	0.01113	0.62176	0.64019	0.94224	1.46942	1.56680	1.23677	0.62901	0.71067	1.27831	1.84097	2.13765	2.32648	1.66234	0.88378	1.05399	2.16858	3.49537	2.18226
SS	ABASSL23	I80514159	10.73810	11.81772	14.67007	19.91277	22.22104	26.16255	22.83664	16.41318	11.49457	12.06283	11.54870	14.40026	16.45001	16.90983	21.56740	25.17566	32.27738	37.35153	18.25093	3.71910
SS	ABASSL23	I67792190	1.69583	2.44116	0.09976	0.57632	1.26544	0.33660	0.20508	0.40243	0.18330	0.11617	0.14052	0.08840	0.25514	0.36070	1.08762	2.37201	1.92885	0.15388	0.19522	0.05173
SS	ABASSL4	I72182948	0.23571	0.00000	0.00000	0.00078	0.05075	0.30382	0.02159	0.23015	0.05093	0.10156	0.10682	0.92637	3.96233	6.31148	3.23706	0.34030	0.15845	0.19183	0.33627	0.23925
SS	ABASSL4	I70305401	36.34345	29.95507	35.06913	39.37150	56.19900	75.07435	77.97229	73.83600	55.60703	39.50268	29.16506	28.27183	54.72042	100.30110	108.60874	94.65230	74.79630	62.01599	52.85324	34.25338
SS	ABASSL4	I70305443	1.46548	1.20625	0.57423	3.36059	3.49783	2.57688	2.22025	2.12872	3.34566	3.97638	7.42330	12.63634	16.25494	17.64142	15.31279	18.96810	17.22204	10.52317	6.93194	4.32782
SS	ABASSL4	I68442871	7.70000	5.29568	10.56441	12.62812	12.81302	14.45590	13.85677	12.89967	13.95863	14.03604	12.21090	12.77440	13.93688	15.70833	18.96909	16.63957	18.63987	20.10835	19.48117	13.65444
SS	ABASSL4	I68191348	0.00000	0.00000	0.00000	0.00000	0.00000	0.00000	0.00000	0.00000	0.00000	0.00000	0.00793	0.11323	0.00814	0.11440	0.04408	0.00000	0.00000	0.00000	0.00000	0.10135
SS	ABASSL4	I68744815	16.23036	23.03808	26.58916	28.55335	29.68080	33.72288	29.57789	21.59482	18.47544	24.24184	22.93928	22.71126	26.09693	39.06729	40.28260	39.89252	34.70193	27.98046	25.03457	15.44707
SS	ABASSL4	I70305478	2.96369	5.55712	9.01571	16.11604	17.39466	16.27678	14.37369	14.22630	16.66081	14.80297	20.98216	33.19777	52.80432	80.51182	79.25992	64.14185	43.22910	37.79267	37.88935	22.63143
SS	ABASSL5	I67787340	33.31429	37.91228	40.11469	40.13668	45.39633	42.73606	41.08285	38.66428	42.53749	47.80955	45.39851	31.57877	29.42802	31.35628	29.99524	37.57520	42.09167	45.31358	42.23117	29.67353
SS	ABASSL5	I70218733	0.41905	0.03209	0.45601	0.35358	0.38598	0.03380	0.42707	0.64526	0.84307	0.89211	1.69046	0.30672	0.08145	0.00000	0.00000	0.00038	0.06627	0.06976	0.51327	0.14075
SS	ABASSL5	I70228711	0.00000	0.00000	0.00000	0.00000	0.00000	0.00000	0.00000	0.18936	0.76913	1.04165	0.52342	0.48352	0.33679	0.08325	0.04280	0.05792	0.49874	0.10463	0.35108	0.49233
SS	ABASSL5	I76003369	8.46667	10.06076	12.00825	13.60008	16.35125	15.59513	17.00613	15.22657	13.96665	16.40307	12.08327	11.05736	11.47485	13.19246	15.91001	20.02146	20.52548	22.11125	21.25293	8.84165
SS	ABASSL5	I71656693	5.91012	8.02011	7.72663	6.04322	8.18898	9.36972	10.86844	10.22850	17.47596	22.67511	23.00124	14.71640	6.99552	6.07441	5.70532	6.90980	12.22002	14.76861	17.61744	9.06857
SS	ABASSL5	I75694270	0.83214	1.13821	1.34721	1.94977	1.63439	2.67185	2.53734	3.32745	3.25388	3.20019	2.84411	2.74144	2.42741	2.30052	2.53905	3.78314	5.56804	5.40094	4.01728	2.45023
SS	ABASSL5	I68191372	0.00000	0.00000	0.00000	0.00000	0.00000	0.00000	0.27655	0.84923	0.47079	0.08475	0.38414	0.03810	0.00041	0.12863	0.04591	0.00209	0.00000	0.00113	0.03256	0.22391
SS	ABASSL5	I69526725	30.83155	29.08087	28.03535	29.31737	26.55726	26.48766	31.53296	32.19598	33.21044	28.59766	27.08501	24.05886	17.92812	18.21227	22.94458	31.34390	35.66796	38.57517	47.28719	31.69519
SS	ABASSL5	I70230987	0.00000	0.00214	0.05892	0.56425	0.16361	0.20615	0.00058	0.00772	0.11634	0.58475	0.24188	0.55629	0.44451	0.31379	0.18474	0.36973	1.84525	1.86872	2.74815	2.10782
SS	ABASSL5	I71281301	13.42679	12.84339	12.72663	17.91589	15.49816	11.05678	11.05630	13.33462	21.02378	26.20604	29.87658	37.00920	30.37915	15.22207	5.93324	5.15686	10.51926	12.92120	13.30401	9.59549
SS	ABASSL5	I71495831	0.32679	0.08644	0.00000	0.19276	0.56962	0.81818	0.93961	1.92420	5.42166	7.20044	2.74052	0.46918	0.00061	0.00000	0.11670	0.29719	0.58705	1.11029	0.74522	0.27414
SS	ABASSL5	I72739	40.30893	41.39153	44.69639	47.91472	50.25943	55.41534	60.07964	48.78060	57.27921	56.35119	60.97869	62.37029	52.08512	46.95962	38.20285	38.42233	51.20471	66.00291	68.81204	58.76391
SS	ABASSL5	I69530702	0.00000	0.00000	0.00000	0.00000	0.00000	0.00000	0.00000	0.00662	0.63909	1.95811	5.95019	3.79923	0.96599	0.30302	0.00000	0.20604	1.00925	0.24786	0.17840	0.11624
SS	ABASSL5	I643550	1.78869	1.13222	3.63119	4.10008	2.66444	3.44137	4.36727	10.35006	18.60134	16.55943	7.79257	3.45569	1.60843	1.34359	1.53265	1.33042	1.81514	3.22832	4.03333	0.53233
SS	ABASSL5	I69548834	6.16667	3.23021	7.55420	8.83879	7.13890	9.75093	8.90928	10.65353	5.59695	5.92280	5.99876	6.58562	3.83649	1.70967	0.64240	1.10122	1.77544	1.59696	1.75941	0.65985
SS	ABASSL5	I176780	55.62500	43.47754	49.38727	60.24260	70.13456	72.32781	80.00642	75.46499	78.17244	89.17608	82.46146	69.30972	52.12360	46.15074	50.86409	62.70699	68.87889	65.91297	57.18549	41.41068
SS	ABASSL5	I70429321	0.00000	0.04279	0.72388	0.39097	0.20467	0.25346	0.57730	0.27729	0.43201	1.30906	1.19331	1.71318	1.24842	0.94905	0.01701	0.00000	0.11791	0.15098	0.13179	0.56617
SS	ABASSL5	I385776	0.05655	2.62388	1.10369	0.32165	3.90651	2.57181	0.10268	1.49835	2.57911	3.13541	5.37200	4.31935	1.08898	2.70583	1.28846	1.06210	1.80589	3.99629	4.89676	3.23188
SS	ABASSL5	I75693034	5.11488	4.99273	5.54360	7.48793	8.38865	9.87969	11.05018	12.49697	17.43666	17.44423	13.10161	7.97303	7.11892	7.34070	9.02250	11.26092	11.95139	12.68287	11.10741	4.65008
SS	ABASSL5	I75259495	7.91012	6.85152	7.07698	7.28271	8.36795	10.07131	11.14061	10.84316	11.16598	15.77837	28.51053	31.94970	20.41682	10.52413	7.76697	12.88587	16.23482	16.55530	15.60093	7.41248
SS	ABASSL5	I631726	0.06310	0.64313	1.91202	3.40537	6.50918	7.02467	5.36231	4.60474	4.79809	5.59669	7.24064	6.55094	11.80656	8.74639	5.54125	1.43183	0.10849	0.40788	0.00509	0.15805
SS	ABASSL5	I70528617	0.00238	0.04835	0.03731	0.28933	0.67412	0.83474	0.89761	2.46499	5.73888	5.21140	1.05601	0.74679	0.45673	0.37839	0.76386	0.15097	0.36821	1.33134	1.53241	1.19850
SS	ABASSL5	I71280670	0.48214	0.01070	0.14690	1.00935	2.32788	2.24197	3.06359	7.25634	8.17451	8.85314	3.96853	3.51498	4.82936	4.77562	4.07701	3.62989	1.93961	1.02018	0.72886	0.37474
SS	ABASSL5	I68844839	21.83750	23.98374	25.42930	19.29089	18.95826	14.85772	20.23396	25.32001	36.49173	43.71140	31.62032	15.68450	9.56547	10.19112	11.89903	18.87277	24.26947	37.22396	39.11559	17.55940
SS	ABASSL5	I70593139	0.02679	0.00000	0.00275	0.11643	0.34257	0.82528	0.39061	0.69763	0.28413	0.32002	0.32069	0.48181	0.04154	0.31340	0.31516	0.62058	0.78688	1.33344	0.75262	0.33098
SS	ABASSL5	I75750310	7.15357	10.22379	10.35978	10.87967	10.89750	9.21088	9.57235	8.82332	9.44519	10.49708	8.41636	6.72581	4.41743	3.86003	5.85294	9.43335	11.54062	15.61392	14.62222	3.37308
SS	ABASSL5	I76081883	4.18214	3.29397	4.44187	4.67251	5.04775	7.00912	6.72725	10.81202	13.02223	9.96420	6.17819	5.91888	5.13073	5.52528	8.04920	7.72522	7.38705	7.11626	4.91790	1.93444
SS	ABASSL5	I74003393	0.00238	0.14891	1.37706	0.16628	0.01870	0.00000	0.06826	0.32828	0.22570	3.19630	2.91004	1.06999	0.23030	0.20515	1.00293	0.27041	0.00286	0.19038	0.14676	0.15654
SS	ABASSL5	I74579938	6.60357	9.19255	12.06284	17.12578	20.12654	29.37411	26.60327	27.76295	54.21225	60.61374	52.73309	29.29987	14.80350	19.37877	19.96086	19.81390	16.21362	18.33812	15.30972	10.79368
SS	ABASSL5	I79360237	5.70774	6.85066	6.94423	7.44743	5.20701	4.57350	4.09364	3.38864	4.95941	6.40502	4.24362	1.72324	1.50275	2.11729	1.94110	2.27972	2.49537	2.31955	1.92006	1.11865
SS	ABASSL5	I2316	0.78988	0.98460	3.26277	6.46690	7.87346	8.22744	6.82818	10.11301	13.78335	9.27253	5.72739	3.46918	2.13765	0.78735	0.23267	1.05260	0.70463	1.07573	0.82994	0.50782
SS	ABASSL5	I71232830	1.14583	2.14035	3.65829	3.88435	5.10351	8.68706	9.51313	10.58159	14.13987	13.42474	8.31425	6.27012	4.54856	1.14920	0.78507	1.87657	2.70093	2.38947	1.58395	0.59188
SS	ABASSL5	I71610855	8.97381	3.85323	5.87942	8.58489	8.44207	10.42312	13.04638	14.90628	12.35755	14.61179	18.04634	19.63035	14.57789	13.77101	14.14395	13.34865	17.70429	19.45664	19.44846	16.69789
SS	ABASSL5	I69671684	0.00000	0.00000	0.00118	0.87617	0.74157	1.82122	5.17415	6.50276	6.48966	2.60789	0.08897	0.10081	0.66911	0.82273	0.43497	0.56836	1.02439	0.22800	0.28488	0.64992
SS	ABASSL5	I71489812	1.00000	0.05862	0.00000	0.00000	0.04274	0.16120	0.22695	0.71307	3.03128	2.40477	0.93234	0.04045	0.00000	0.00865	0.16682	0.04026	0.17477	0.07137	0.44769	0.34932
SS	ABASSL5	I72283695	48.79881	42.19170	47.51571	45.42407	47.01402	48.86516	49.55163	43.27811	41.31722	50.03775	62.53209	75.94991	83.77276	69.02269	61.07353	82.48823	101.86510	116.14500	104.58719	24.77308
SS	ABASSL5	I69736436	18.60655	18.34104	21.95012	26.01363	30.56861	34.55188	35.46849	33.51874	37.70165	37.21505	22.30756	10.92145	14.61413	20.11575	31.57582	48.04007	49.12178	46.63426	40.72531	8.67925
SS	ABASSL5	I69752167	2.06905	1.23534	0.19560	1.01674	0.22705	0.36904	1.45187	1.97216	3.97802	5.78933	5.05750	2.40668	1.13908	0.24899	0.35815	0.27706	0.39243	0.05054	0.51790	0.40376
SS	ABASSL5	I294041	0.14643	0.62730	0.67046	0.85981	1.52087	6.62149	15.63623	17.61301	11.20424	5.09474	1.36753	0.59182	0.89921	2.36224	4.35833	7.99962	12.68192	18.63749	12.45370	4.20797
SS	ABASSL5	I70546287	1.52202	2.67565	4.59898	4.77375	5.56928	8.01690	8.47491	14.44956	22.74043	14.49659	8.54944	2.99872	1.49949	2.67948	3.86172	9.34580	11.26712	10.71516	9.41698	7.32857
SS	ABASSL5	I69236748	0.72798	0.83783	0.73566	1.70950	0.64775	0.51031	0.22754	1.02619	0.67011	1.60546	0.44709	0.51241	0.43311	0.26360	0.40113	0.90600	1.32548	2.43339	3.60972	4.14692
SS	ABASSL5	I70610412	0.00000	0.00000	0.00000	0.00000	0.00000	0.00608	0.94545	3.99090	3.00595	3.23551	1.79430	0.47517	0.13419	0.07806	1.22864	1.23680	1.96064	2.31713	2.90139	1.16241
SS	ABASSL5	I69258220	0.00000	0.00000	0.01414	0.27064	0.53289	0.58601	0.62544	1.19818	0.37487	0.30321	1.25774	1.36408	1.73895	0.84215	0.27163	0.32662	0.67014	0.05732	0.00000	0.00000
SS	ABASSL5	I71210577	10.62679	10.40223	14.47800	19.00857	24.03239	27.92227	29.50408	25.75331	36.15202	39.03580	31.60570	18.81849	9.93423	8.69775	11.07335	22.49525	35.06493	35.60132	39.01836	23.37338
SS	ABASSL5	I70429154	0.97738	1.57082	2.25727	4.35709	5.90952	7.66712	4.85823	5.48677	7.79162	10.61276	11.27584	10.84932	4.24985	2.31263	2.07682	2.80346	5.11741	8.02341	5.44321	3.63759
SS	ABASSL5	I71662897	0.59107	0.00727	0.03064	0.70755	1.60768	2.07807	0.65432	0.71031	0.60160	2.78933	2.90657	3.61901	3.53818	0.56182	0.27456	0.79624	0.82927	2.04586	2.59321	1.76992
SS	ABASSL5	I71664132	0.29702	0.48652	0.45365	0.54322	0.88247	2.61271	3.18174	3.42503	2.37978	2.12299	1.71276	0.81293	0.41173	0.68141	1.46607	2.31485	2.23230	2.12369	1.52731	0.81474
SS	ABASSL5	I69817432	22.70179	19.18528	19.68421	19.78816	22.82104	23.43934	22.90898	19.56257	20.66158	23.41330	24.06518	19.29987	14.10548	11.03480	10.83062	16.72009	23.10463	24.60068	26.15833	15.41023
SS	ABASSL5	I69818000	5.94286	5.22935	8.05538	6.88707	6.84341	8.14498	8.44282	10.97244	15.29007	20.32660	21.57398	14.72945	6.36449	3.31186	5.57929	9.59153	11.62708	13.69013	16.43966	8.27865
SS	ABASSL5	I72001864	15.83690	12.73556	4.00628	2.05335	4.23372	7.55390	9.37106	7.27067	9.99897	12.63736	14.53532	21.03874	31.41886	30.78696	24.63527	22.76795	21.40555	17.14129	12.93488	8.77534
SS	ABASSL5	I940	1.97917	1.69961	2.39081	3.57321	2.10484	2.84623	2.31797	2.51571	3.83014	2.05431	0.95192	1.42273	2.00041	1.62565	1.81434	3.08469	3.94079	3.43275	4.52407	5.50105
SS	ABASSL5	I69013314	0.00000	0.00000	0.04517	0.99766	3.62905	2.11930	3.32322	2.08104	5.70217	6.85972	5.49517	1.10788	0.58135	1.81850	1.16755	0.64945	0.17426	0.54384	0.33827	0.26421
SS	ABASSL5	I71724696	0.12500	0.01113	0.23606	0.14291	0.34558	0.08719	0.70508	1.39857	2.00853	3.88018	7.21388	6.95398	4.84891	1.19477	0.46058	1.01120	2.71876	1.63636	0.87238	1.30015
SS	ABASSL5	I68193019	52.13750	52.70047	62.53849	59.01129	59.43005	69.36026	68.04347	56.26626	60.67580	61.93936	58.56283	47.29859	48.83690	52.76120	59.51930	66.88454	70.33675	74.82981	69.97716	32.69323
SS	ABASSL5	I71488819	0.00000	0.00000	0.00000	0.00000	0.00000	0.00473	0.13419	0.32635	0.39840	0.68972	1.35663	0.68493	0.11810	0.06903	0.01207	0.22712	0.00084	0.00000	0.00000	0.07609
SS	ABASSL5	I69887529	0.00000	0.03723	1.04124	9.71573	8.69850	5.75161	4.96383	5.63423	5.34798	4.80127	5.67757	5.83219	8.15638	10.20458	9.23468	8.32472	2.03162	0.99645	1.78086	0.90842
SS	ABASSL5	I70793947	0.58750	2.82157	8.81854	13.18575	17.04975	20.42143	21.46674	17.63809	13.90926	20.64418	21.62404	13.61280	5.82000	4.07422	3.39601	3.73965	4.58436	4.72404	4.08302	3.90932
SS	ABASSL5	I69980208	0.01786	0.14549	0.07541	0.87967	0.68314	1.19601	1.85881	7.15877	10.83480	9.73307	3.39603	0.76562	0.13582	0.44318	0.95903	1.71648	2.42910	4.10383	7.06898	3.36316
SS	ABASSL5	I69981085	5.09940	5.83911	7.33307	12.58294	22.02838	28.06049	24.91628	28.66097	31.08454	32.50901	22.26270	15.43044	14.26838	13.49048	20.57289	27.87448	30.47603	30.27838	22.30556	14.51338
SS	ABASSL5	I68203444	16.40000	12.78220	16.89552	18.59657	19.56628	26.56134	31.27246	26.12293	30.18097	35.01291	31.02503	27.11366	22.34168	15.48414	15.95610	25.49525	29.64037	31.35249	33.55046	16.18045
SS	ABASSL5	I68203484	19.66310	9.84724	16.42145	21.47508	20.43372	27.87327	32.43057	31.86659	34.05765	37.88310	39.68451	25.60039	16.16534	14.33801	14.74538	16.27687	16.35728	14.66462	14.48735	11.56421
SS	ABASSL5	I75750439	23.94345	33.38554	36.30793	36.88980	39.24541	38.30078	34.86931	34.71555	33.21406	29.94983	31.14102	32.96533	22.07188	13.04249	13.74319	18.82378	24.67300	27.70935	34.85664	27.87368
SS	ABASSL5	I71280676	0.29226	0.66068	1.98272	1.12305	2.10651	3.78168	4.14848	4.52122	10.52327	11.24135	7.84833	2.48009	0.52576	1.49510	1.10499	2.64508	2.45114	1.93590	1.52731	0.50105
SS	ABASSL6	I70230975	5.17798	14.41078	27.88688	37.34073	40.85275	43.19128	32.45945	16.42089	4.71691	2.23332	0.92962	0.85659	2.68418	6.91386	15.73276	21.66065	20.90244	22.64637	22.94321	5.03669
SS	ABASSL6	I80474700	6.71190	5.55499	5.62529	5.96379	8.16394	8.23826	8.13156	9.36466	8.49948	7.67901	7.88327	7.21383	7.07127	4.21515	1.80483	2.96772	2.56215	1.56289	1.53318	1.74466
SS	ABASSL6	I68410285	19.68512	16.20240	14.13079	16.45950	16.30651	15.74958	19.38127	25.36218	27.95812	20.59912	25.18662	23.29645	20.64977	13.17862	13.51216	14.90543	13.59361	11.17487	11.04846	8.67474
SS	ABASSL6	I69672605	1.70952	4.84039	3.73684	9.87188	12.06778	7.37107	3.19953	1.86797	1.71975	0.89406	0.11722	0.13014	0.05070	0.38396	1.30346	3.09647	5.02742	9.04198	10.35602	4.58767
SS	ABASSL6	I70431325	0.14345	0.79932	1.54517	5.05413	6.20367	8.26901	8.59860	9.17723	10.88133	6.06016	2.52169	1.06785	0.71818	0.38031	0.55167	0.31998	0.09100	0.15453	0.37346	1.85158
SS	ABASSL6	I76098396	26.36190	28.01070	27.13983	27.88045	28.34858	30.91010	31.73862	25.94157	20.86970	18.24744	19.88773	16.88121	16.82081	16.00346	18.23962	22.67110	25.51220	28.30987	29.19198	20.30872
SS	ABASSL6	I1364	0.00000	0.15233	0.98350	1.32749	1.46845	0.37749	0.45449	0.13148	0.00931	0.00000	0.00000	0.00000	0.02138	0.10133	0.08195	0.15989	0.01379	0.01760	0.04799	0.06406
SS	ABASSL6	I68300920	0.00000	0.00000	0.00000	0.00000	0.22604	0.55188	0.72841	0.17089	0.27999	0.00219	0.00000	0.00193	0.89839	0.39915	0.27236	0.03190	0.00000	0.00000	0.03503	0.22000
SS	ABASSL6	I559	0.00000	0.00000	0.00000	0.18069	0.27913	0.60831	0.72754	0.81174	0.21432	0.15684	0.57200	0.21318	0.00387	0.06653	0.01756	0.09324	0.49857	0.24366	0.08657	0.19263
SS	ABASSL6	I70303707	2.76905	3.92255	7.32836	7.86176	7.81569	8.09699	6.67211	5.28032	2.45631	0.80346	0.32441	0.19949	0.62920	0.45933	0.59137	1.17831	0.92700	0.92314	3.46327	3.61940
SS	ABASSL6	I69671732	0.72976	3.41421	5.07227	6.03037	6.94424	7.16458	4.93932	4.89278	2.19312	1.80882	0.68079	0.00000	0.00000	0.00000	0.01024	0.22446	0.39714	0.20410	0.21759	0.08647
SS	ABASSL6	I68744624	7.36429	4.87206	5.18657	7.41472	8.72354	9.84826	7.12485	7.87348	11.91520	12.24014	8.74250	5.27932	3.35451	4.09537	5.50668	5.01234	3.79647	2.94914	2.05926	1.20541
SS	ABASSL6	I77800939	26.31786	34.03552	40.32797	43.52765	47.95793	46.58398	42.53705	38.55899	35.66132	35.68047	30.00099	24.40946	26.64468	31.50644	32.41741	31.83384	32.27082	29.67173	21.95602	8.09579
SS	ABASSL6	I583869	2.90417	2.86179	4.15632	4.97391	5.50284	3.15782	6.33576	6.86963	4.94028	4.86215	5.22181	3.02055	2.55447	2.60777	3.05616	2.90296	1.48074	2.94671	2.52932	1.76120
SS	ABASSL6	I68545545	14.81905	47.39795	67.32718	65.86137	66.92688	38.81886	24.48716	18.49366	16.14659	20.67584	22.69442	9.13378	1.68540	0.68968	0.95811	4.13160	8.13524	13.66672	27.65540	11.07835
SS	ABASSL6	I67979027	0.43631	0.23492	0.56284	0.19509	0.47112	0.10814	0.21266	0.03997	0.00000	0.00000	0.00000	0.00000	0.00000	0.00000	0.00000	0.00000	0.00000	0.00000	0.01759	0.01504
SS	ABASSL6b	I71789970	34.16190	35.79161	36.42419	44.73481	37.89316	33.62251	35.29055	30.50882	25.52223	22.14394	21.61289	22.61387	21.96192	22.12075	18.38339	13.15837	14.01177	15.34700	12.84151	15.07023
SS	ABASSL6b	I69514410	2.60536	2.35730	3.60212	3.44042	2.03272	2.30652	3.70624	2.85750	3.68821	4.05163	4.88971	3.45612	3.87355	4.34897	2.14286	1.15515	2.40067	3.72905	6.05772	5.95609
SS	ABASSL6b	I70723343	1.00476	0.04750	0.36096	0.51051	0.00000	0.00000	0.00000	0.00000	0.00000	0.00000	0.00000	0.00000	0.06149	0.10267	0.00768	0.00000	0.00000	0.00000	0.15802	0.63669
SS	ABASSL6b	I69526934	7.50833	8.25845	6.23566	1.77570	2.04574	1.43258	0.13419	0.50083	0.37720	1.20823	0.65130	0.37093	0.48055	0.22534	0.26376	0.20148	0.41077	0.65300	0.42454	1.46286
SS	ABASSL6b	I68157389	33.00119	34.18571	21.41555	27.35280	31.55626	32.21460	27.93874	23.85998	16.56980	18.32148	16.97745	12.85231	13.56730	16.38031	23.94750	36.91891	41.66241	46.51413	49.29676	16.52602
SS	ABASSL6b	I69530917	5.22560	5.34617	1.49293	1.32749	0.42972	0.00980	0.11202	0.40132	0.28775	0.31564	0.08848	0.16610	0.19141	0.12075	0.06091	0.23813	0.88511	3.08057	6.62623	2.13910
SS	ABASSL6b	I68795395	16.95833	27.51861	14.14297	3.47975	0.84841	0.59682	0.66919	0.23456	0.73811	0.92231	0.31152	0.66759	0.39300	0.00385	0.18749	0.28143	0.21295	0.42645	0.80031	0.39474
SS	ABASSL6b	I68920656	46.63690	28.29739	19.65672	20.33762	18.04942	17.05813	17.03646	13.91180	15.71562	20.65684	20.24188	15.15689	10.07982	9.70160	13.77209	21.96867	28.47620	34.61666	24.83688	3.69985
SS	ABASSL6b	I69734560	0.40476	0.00856	0.00000	0.00000	0.00000	0.02568	0.35239	0.25138	0.19157	0.00073	0.00149	0.03275	1.44288	0.08498	0.00000	0.00000	0.00000	0.00000	0.07747	0.01278
SS	ABASSL6b	I68919886	4.16071	2.62816	4.86096	10.29673	3.07379	0.34235	0.18495	0.17475	0.00078	0.53629	2.24734	2.81143	2.86031	3.70236	4.23084	2.91986	0.55391	0.46859	0.68241	0.13158
SS	ABASSL6b	I68845813	21.94167	14.87249	11.02789	14.10631	9.37930	5.56404	4.34889	4.11742	2.11401	1.61081	0.97125	2.20163	1.99287	1.63372	1.00348	0.76738	0.53743	0.37898	0.50417	0.50902
SS	ABASSL6b	I75198208	8.79940	6.72101	2.74077	2.16355	1.24942	1.85536	2.65840	2.05733	2.58247	2.80321	1.73705	1.47817	1.56261	1.80638	1.87580	1.64755	2.49504	2.79315	3.13488	1.47489
SS	ABASSL6b	I71570739	4.84048	1.12751	0.01218	0.00000	0.21903	0.42481	0.00525	0.00000	0.00000	0.11520	0.20620	0.49957	0.11159	0.18266	0.12146	0.06703	0.29571	0.39674	0.54861	0.12647
SS	ABASSL6b	I70919059	23.47976	22.64356	26.32168	27.42407	29.62604	28.76512	27.31330	20.84675	16.92270	18.61301	18.23371	14.90026	14.79169	15.35051	14.71118	20.93468	25.92784	28.81172	30.40309	20.86376
SS	ABASSL6b	I71234703	37.36964	9.05220	0.32561	0.00000	0.02504	0.32883	0.19224	0.51323	0.43511	1.17925	2.11599	1.62521	2.97740	0.94540	0.31425	0.84618	1.25753	2.89601	2.08796	0.11669
SS	ABASSL6b	I68077018	11.01131	8.33248	12.00707	8.98442	8.99566	8.63434	5.18291	4.55265	2.72389	1.20044	0.37026	0.15860	0.22256	0.76005	1.16554	1.88625	2.23987	6.62877	8.25864	4.96496
SS	ABASSL6b	I69816757	19.89167	27.33077	10.18107	3.09930	2.07913	1.88814	1.48454	1.97161	0.91753	0.95933	0.27931	0.01841	0.10548	0.00692	0.00000	0.07368	0.05585	0.00000	0.31975	0.13053
SS	ABASSL6b	I954	0.78274	2.84938	9.36017	3.42445	1.73523	1.41669	0.59481	0.72630	0.36582	0.59133	0.04758	0.00685	0.00835	0.10306	0.10993	0.10387	0.01278	0.00000	0.00309	0.11549
SS	ABASSL6b	I69873839	68.30179	69.80745	62.25923	56.20249	63.13489	63.94863	65.69632	55.15628	38.75853	39.47784	49.11549	50.55073	46.76787	48.97904	44.22627	40.65818	46.13507	54.68416	66.66250	62.71248
SS	ABASSL6b	I69262284	25.32500	58.22721	43.13747	44.81386	37.58664	39.68942	41.78646	39.94653	29.85651	24.34681	20.55812	27.00728	29.30523	32.76293	34.32468	29.78257	29.46712	27.40853	28.99969	25.46962
SS	ABASSL6b	I70795772	0.59226	10.02139	35.63354	13.44782	6.67880	7.65056	3.95741	4.70562	4.13831	4.60789	3.78265	2.84375	2.59601	0.69179	0.44503	1.26700	0.69622	0.66672	1.36713	1.11925
SS	ABASSL6b	I80473469	6.83571	10.43004	3.42852	2.02259	2.58230	2.97296	3.61552	3.74559	1.98656	1.20166	1.67485	2.72003	1.94950	1.67968	1.90324	2.21003	1.77124	1.64847	1.75031	1.38917
SS	ABASSL6b	I76098295	7.15893	6.93967	2.62726	2.29751	2.58664	3.14836	3.23308	2.79162	2.55791	2.78105	3.00867	3.19628	3.51660	3.19458	2.07225	2.70205	3.09857	3.06814	2.67330	2.17820
SS	ABASSL6b	I70445275	9.59167	5.96448	2.88099	0.08294	0.24073	0.22541	0.00817	0.06036	0.67580	0.32026	0.17844	0.47817	0.97638	0.99039	1.13353	0.80441	1.05618	3.45148	3.08843	1.64947
Vis	ABASSL23	I75695669	84.54617	82.53781	76.66742	73.08657	55.35038	49.13076	49.85013	56.14743	58.94558	60.38537	71.19102	67.22898	80.19766	97.26129	107.46077	116.85198	118.95355	92.83134	16.38160	2.92515
Vis	ABASSL23	I294039	30.12391	43.19045	45.47472	46.29075	31.94133	31.89596	32.84755	33.06965	27.66600	28.42537	23.29697	23.93682	35.29346	55.33041	52.53467	58.93307	54.83475	29.09498	7.68838	64.93499
Vis	ABASSL23	I68196937	0.60221	0.36214	1.66461	0.89910	0.47363	0.30074	1.56279	4.74174	5.45582	3.35171	2.26514	1.37245	1.84299	5.57005	10.70073	11.29604	16.82715	12.42610	4.08803	0.96578
Vis	ABASSL23	I532610	36.50513	43.16487	40.59663	37.35284	35.86598	34.24503	38.54419	44.74326	42.32102	48.17366	34.91806	36.70166	42.38925	55.12488	57.71122	69.17196	56.30683	24.74612	2.07658	0.09538
Vis	ABASSL23	I73818841	3.49250	5.53098	8.20337	7.68060	8.72820	11.97669	16.19121	20.47789	20.86920	22.84683	18.94572	19.19857	25.70748	39.89309	52.12454	61.42110	59.36534	37.62006	4.61224	0.11420
Vis	ABASSL23	I72081795	0.00000	0.00000	0.00000	0.00000	0.00000	0.00000	0.00000	0.00000	0.00000	0.00000	0.00000	0.00000	0.02430	0.33548	0.14599	0.09428	0.49129	0.30937	0.25044	0.02224
Vis	ABASSL23	I71574383	1.77585	3.52246	2.62809	2.20299	1.37944	2.25924	2.71266	1.22115	0.86570	0.00976	0.00000	0.00238	0.48645	1.09908	1.16880	1.54568	0.90130	0.21127	0.10960	0.01967
Vis	ABASSL23	I69526564	1.62194	0.79477	0.37472	0.02209	0.28956	1.43945	1.26770	0.42044	0.46630	0.01073	0.00000	0.01568	0.07897	0.42166	0.35310	0.85002	1.01563	0.16378	0.03433	0.00000
Vis	ABASSL23	I69449020	3.44278	8.92951	6.56124	6.32239	4.48224	3.13132	4.51266	11.19929	8.14378	3.85902	2.65658	1.59810	2.82430	11.26959	20.60766	31.16219	38.90085	34.77142	9.66153	1.43413
Vis	ABASSL23	I68910955	78.26914	89.46219	89.02584	80.52478	72.37998	68.79761	69.09922	73.88155	78.77234	79.57220	63.11534	59.16390	47.31916	56.97281	70.78878	85.95359	96.12952	91.71416	82.74032	27.79256
Vis	ABASSL23	I69015811	115.18074	118.30244	110.90225	98.68836	78.39505	59.30358	61.77984	63.83020	52.19770	49.52732	54.33194	62.34299	85.32243	101.71797	121.55839	133.41475	146.96427	120.40213	19.44146	0.77759
Vis	ABASSL23	I71580186	0.00000	0.00000	0.00000	0.00000	0.00054	0.03013	0.22584	0.06863	0.00000	0.02195	0.41701	0.55914	1.01776	1.63917	2.54060	1.21593	1.89281	0.45362	0.08627	0.01326
Vis	ABASSL23	I70238794	4.32991	7.94656	9.95449	12.91164	16.93488	4.86640	1.42894	3.15252	11.59211	24.71659	23.25731	31.28741	39.97336	45.85714	63.95849	58.16365	50.36623	18.75100	0.78345	0.01240
Vis	ABASSL23	I587416	13.88477	23.34565	31.12360	31.97313	30.69914	16.28027	12.82687	13.98373	17.16425	25.57415	26.40136	29.85463	36.48879	55.33779	71.76734	84.75916	85.35328	54.87439	9.98636	2.05603
Vis	ABASSL23	I73606485	60.44988	74.48209	78.49157	69.94925	58.84069	46.85787	48.66873	45.86477	58.39591	64.82146	67.64823	75.60713	91.55654	98.89217	112.47901	132.14314	102.26172	47.38482	2.08143	0.06159
Vis	ABASSL23	I1610	19.98264	13.98806	15.41124	13.22269	11.72067	12.77430	10.28786	11.38536	9.08437	9.72049	7.21138	8.26936	10.25093	12.20829	16.50958	19.42697	20.12461	21.68176	12.05282	3.90932
Vis	ABASSL23	I70231158	2.42068	4.71404	3.94382	2.72776	2.81701	3.91814	2.49664	3.28724	5.29556	4.75951	3.05010	6.21520	14.97664	21.15760	19.21898	17.15193	18.20858	16.09099	3.23856	0.26219
Vis	ABASSL23	I1731	0.00000	0.00000	0.00000	0.00000	0.00000	0.00000	0.00000	0.00000	0.00000	0.00000	0.00000	0.00000	0.00000	0.00000	0.00000	0.00000	0.00000	0.00000	0.00000	0.00000
Vis	ABASSL23	I74357593	50.71586	71.83627	84.08539	78.75582	78.74489	56.22626	53.29096	64.46568	65.79730	60.73756	48.33090	43.45986	48.53551	80.39217	95.72536	103.31900	110.71192	94.37150	39.61752	9.64371
Vis	ABASSL23	I69735156	3.01342	2.85276	1.48820	1.60119	3.04413	5.16771	2.44806	1.76919	2.32851	1.88049	2.91545	4.99382	2.66355	1.22166	1.99681	1.13239	0.16391	0.74079	1.07702	0.21129
Vis	ABASSL23	I68861816	6.34175	9.27743	10.42584	8.87940	5.96125	7.87834	9.04238	11.40519	8.43235	5.31366	5.71868	6.86841	7.62430	13.15714	22.26186	27.02638	40.88343	35.70439	9.15713	1.98589
Vis	ABASSL23	I70303701	0.93844	2.32064	4.58820	6.09373	4.10764	0.86413	1.15297	1.08134	1.57264	2.78927	5.98800	10.90831	13.86168	18.48710	19.65876	15.99218	15.48459	7.05814	2.18266	1.77331
Vis	ABASSL23	I71210172	0.00000	0.00000	0.00000	0.01612	0.10388	0.13360	0.22997	1.55109	1.38442	1.51171	1.56315	0.69834	0.92243	0.85853	0.81296	2.17391	0.97678	0.72925	0.02245	0.00000
Vis	ABASSL23	I69782706	29.75691	41.96020	49.07640	49.29313	44.22282	38.42183	18.55194	22.46823	25.56765	28.37268	27.33925	30.66746	47.84533	75.84194	96.59307	108.06106	100.07995	39.71327	4.98900	0.82763
Vis	ABASSL23	I68269267	0.00000	0.00000	0.00000	0.00000	0.05813	0.44230	1.32403	1.97204	2.61907	4.53268	5.64614	7.59952	15.35467	28.75945	35.76460	45.50806	43.75212	30.39237	10.93750	0.87382
Vis	ABASSL23	I77464848	96.98500	103.56794	104.31742	101.25254	90.60872	69.44514	66.90904	81.88815	85.63105	85.10829	95.43946	97.12922	109.96495	125.95714	133.46442	142.23498	148.10362	108.93875	25.39261	3.45509
Vis	ABASSL23	I824	75.64483	83.92496	83.71404	84.96716	74.22174	68.53667	74.44755	79.43518	70.10185	68.83902	76.33977	78.52732	88.56869	85.82903	90.70803	97.84172	102.68423	89.30182	40.59815	18.01796
Vis	ABASSL23	I77620427	14.07340	16.97214	17.65169	17.06687	18.37244	15.69471	13.73695	16.09456	13.80429	14.58488	13.45094	16.18242	21.14159	29.70968	30.63869	27.64485	25.14515	21.43364	6.47447	0.34431
Vis	ABASSL23	I2698	0.31571	0.01023	0.00000	0.00000	0.00054	0.34167	0.35194	0.11235	0.20020	0.45317	0.57098	0.37672	0.36402	0.61797	1.23038	0.29653	0.48057	0.59654	0.55414	0.20701
Vis	ABASSL23	I80514159	17.80821	20.43093	21.54382	18.27642	18.75135	16.12564	13.80827	11.19980	14.46580	13.81951	15.73956	17.17862	17.51308	25.41475	32.85766	32.14753	22.40777	8.08389	1.45907	0.04919
Vis	ABASSL23	I67792190	0.07419	0.37067	0.24101	0.02448	0.00000	0.15918	0.24599	2.06914	2.10734	0.06732	0.30115	0.43848	0.25467	0.67604	2.07391	3.81436	2.85083	0.72126	0.38864	0.63601
Vis	ABASSL4	I72182948	1.22652	0.01933	0.00281	0.06030	0.82400	0.37635	0.00000	0.00559	0.25262	0.76829	1.00000	6.06556	8.35280	7.09585	6.14781	7.64680	6.44886	0.45184	0.00132	0.00000
Vis	ABASSL4	I70305401	30.97395	34.71802	41.81011	47.70985	54.15662	42.61740	47.27700	50.71225	43.81478	32.33805	28.22390	37.21425	63.11449	81.14470	86.74818	75.08451	63.49218	39.13893	17.39129	10.56202
Vis	ABASSL4	I70305443	0.71034	2.30244	3.13090	2.27701	1.88913	1.73223	1.77261	2.72598	6.13030	7.23902	8.50052	10.98860	11.31028	8.32673	8.04060	4.61309	4.53685	3.63693	2.09859	1.03935
Vis	ABASSL4	I68442871	10.29992	17.18647	20.60169	17.86925	11.66846	10.00966	9.75090	16.45653	19.30954	20.28098	23.61534	23.40475	22.13505	25.67373	25.96624	29.05178	29.71952	18.47847	4.04137	29.56715
Vis	ABASSL4	I68191348	0.00000	0.00000	0.00000	0.00000	0.00000	0.00000	0.00000	0.00000	0.00000	0.00000	0.00000	0.00523	0.05748	0.10415	0.00091	0.01905	0.18222	0.15357	0.69806	0.05175
Vis	ABASSL4	I68744815	24.25020	29.38317	24.12247	21.32955	18.30517	12.59125	9.17416	15.92069	15.96355	16.62488	13.62630	25.31496	33.20374	30.99954	27.30885	23.00244	14.64046	12.29783	4.69322	0.51027
Vis	ABASSL4	I70305478	5.29203	7.15009	10.03989	12.11403	18.62217	14.77374	8.27287	9.17489	20.91313	48.01024	87.96503	100.75677	94.31729	68.68065	53.49179	44.91695	30.55248	24.42344	9.80986	2.56074
Vis	ABASSL5	I67787340	47.47751	54.13360	54.19831	53.99940	52.09042	43.86868	43.59121	47.13472	58.57963	49.84634	39.33038	34.40903	25.10187	36.93594	48.10219	49.03908	45.06208	40.93032	17.97579	2.61805
Vis	ABASSL5	I70218733	1.88161	3.50654	3.59494	1.80418	0.72336	0.38204	1.65013	4.34164	1.51173	0.14000	0.18319	0.06746	0.00841	0.00092	0.00000	0.22570	0.39973	0.85175	1.16813	0.72327
Vis	ABASSL5	I70228711	0.00000	0.00000	0.00000	0.00000	0.00000	0.00000	0.09354	1.24403	0.13230	0.23024	0.02714	0.00000	0.00000	0.06866	0.51962	0.15291	0.03573	0.07013	0.55546	0.07656
Vis	ABASSL5	I76003369	10.85399	13.70779	15.97360	13.34448	9.66093	12.35759	16.46253	13.54652	7.79680	7.43171	7.35543	10.34632	13.42103	16.00599	17.47993	17.05765	15.36847	10.63249	4.89393	0.77374
Vis	ABASSL5	I71656693	18.43410	16.91814	9.85337	11.83463	8.79010	14.51052	24.50646	30.01474	29.19371	16.49122	7.37370	5.11354	7.24159	14.65576	18.61907	23.14900	22.93792	12.89436	2.35035	0.16296
Vis	ABASSL5	I75694270	1.78453	2.24503	2.48034	2.39224	2.20775	3.60887	4.76021	5.13726	3.81727	3.17805	2.50731	2.54774	3.86869	4.80276	6.36998	6.82609	6.05895	5.23169	2.75000	1.31352
Vis	ABASSL5	I68191372	0.00000	0.00000	0.00000	0.00000	0.00000	0.00000	0.00000	0.00102	0.03445	0.22537	0.05741	0.03183	0.43738	0.73180	1.54425	8.21593	2.20545	0.27652	0.02685	0.00000
Vis	ABASSL5	I69526725	32.09392	36.87720	29.30112	33.95940	24.34499	30.27857	31.01964	40.44738	41.12082	44.54195	35.76879	29.76247	29.40093	40.04101	52.02737	53.41378	56.22465	46.90058	25.99780	7.60479
Vis	ABASSL5	I70230987	0.04657	0.46163	1.10225	0.46090	0.71529	1.00284	2.47183	3.74886	3.57014	2.92537	1.25835	0.58432	1.28925	1.93410	1.56934	2.72252	3.47298	0.26587	0.02157	39.04577
Vis	ABASSL5	I71281301	27.29519	27.69642	24.90337	20.03463	16.39236	11.22626	15.24341	18.20742	29.54768	35.40000	36.63987	30.79287	20.86355	14.20599	13.37044	15.33757	16.04064	19.16911	15.64040	3.09709
Vis	ABASSL5	I71495831	0.00000	0.00000	0.00281	0.20716	0.25834	0.50085	5.29974	12.61464	8.76385	2.14585	0.38674	0.21283	0.17336	0.44101	0.49270	1.11627	0.94328	0.84021	0.54269	0.04106
Vis	ABASSL5	I72739	18.27782	27.43320	37.18764	38.80597	46.44080	50.35077	52.80982	43.73310	39.81578	46.67756	52.65501	55.93397	56.93224	45.14240	42.28969	27.47582	24.27468	25.89436	28.35607	33.60009
Vis	ABASSL5	I69530702	0.33544	0.05230	0.00169	0.00000	0.00000	0.14099	1.46770	4.54398	11.81528	6.94927	1.70459	0.10736	0.15467	0.20922	0.03285	0.05862	0.23135	0.01909	0.00000	0.00000
Vis	ABASSL5	I643550	0.36069	1.50711	1.85506	2.23940	3.14370	3.13360	8.00465	16.15455	16.95657	6.18488	1.23225	0.18052	0.10327	0.25530	1.06661	3.40840	3.22063	1.81536	2.63644	0.20274
Vis	ABASSL5	I69548834	7.48382	7.86413	14.37022	9.17075	9.19752	7.29619	11.12765	17.14997	18.86470	10.61415	5.05532	1.51686	0.66355	1.94009	3.70255	6.41036	3.19652	0.69419	0.35475	0.04106
Vis	ABASSL5	I176780	45.73639	65.23422	73.96629	77.69373	67.95318	60.44684	69.70388	88.51500	89.95507	79.59463	64.88048	50.57435	53.60000	56.35253	62.04836	60.96678	57.19473	57.86951	33.78257	7.29299
Vis	ABASSL5	I70429321	0.00000	0.00000	0.00000	0.00000	0.00538	0.05173	1.00724	2.84596	2.03944	1.06341	0.08455	0.00095	0.01776	0.31751	0.27692	0.50611	0.52434	0.45362	0.84287	0.81480
Vis	ABASSL5	I385776	0.82952	0.50767	0.17528	1.13851	0.11195	0.20409	0.30801	0.55211	1.25711	1.56244	1.42484	1.37150	1.27336	2.35622	3.29927	4.25159	10.17285	7.91522	5.17826	1.79598
Vis	ABASSL5	I75693034	5.35675	5.13644	5.01461	4.06209	5.29171	10.44116	28.78656	35.75343	19.72591	7.39171	6.21138	4.04608	5.09299	5.53456	5.95438	8.26527	6.14337	4.74745	1.23636	0.97177
Vis	ABASSL5	I75259495	12.57380	13.90620	15.09944	13.08537	11.32293	14.58215	17.95142	23.94204	32.11982	34.02585	27.73643	16.74679	14.97477	17.94332	18.65100	19.62726	18.39705	11.85752	3.13160	0.85329
Vis	ABASSL5	I631726	1.05683	0.52132	0.46910	2.56418	6.47417	7.66003	7.37003	6.25775	4.32401	5.28976	6.32724	3.85463	3.62430	1.34101	0.28513	0.00000	0.00000	0.00000	0.00000	0.18306
Vis	ABASSL5	I70528617	0.00000	0.00000	0.04888	0.79403	0.64532	2.26549	5.03359	8.63752	9.05791	5.80683	1.22651	0.17055	0.17336	1.75806	0.91971	1.01172	3.05494	2.71860	0.90493	0.35158
Vis	ABASSL5	I71280670	0.12707	0.51563	0.01629	0.05612	1.34015	0.62308	4.82946	7.43671	4.71243	1.87951	0.72338	0.57197	0.40701	0.53687	1.44845	1.59648	1.37383	0.20728	0.03741	0.00043
Vis	ABASSL5	I68844839	49.19416	65.00341	53.09775	45.96836	31.54144	29.32916	64.65426	73.11693	63.16825	48.48634	39.96921	36.16532	43.88785	53.39171	58.53011	70.46312	81.17954	47.68531	8.54886	0.96065
Vis	ABASSL5	I70593139	0.00000	0.18931	1.50112	1.09791	0.14693	0.12280	1.44134	1.19827	0.64304	0.22000	0.35334	0.51971	0.89953	1.62120	2.61542	6.40352	6.18490	5.11585	0.47095	0.02096
Vis	ABASSL5	I75750310	10.99290	19.47470	17.93539	16.59164	14.37137	12.13872	11.14574	14.22471	10.44833	11.71317	12.79802	11.43040	12.03832	12.62350	17.64553	22.98290	20.63912	16.95118	4.27157	2.40505
Vis	ABASSL5	I76081883	6.34807	4.71632	8.43539	8.53791	6.98762	8.48664	13.84186	16.47890	9.10334	6.65561	5.61013	6.61045	7.57056	7.25392	6.39370	6.70640	6.35060	3.87128	2.62412	0.24636
Vis	ABASSL5	I74003393	0.00000	0.00000	0.00000	0.00000	0.00000	0.00000	0.16021	1.82257	2.64753	1.10000	0.07203	0.00190	0.00000	0.00000	0.00000	0.00000	0.00000	0.00000	0.00000	0.00000
Vis	ABASSL5	I74579938	8.45462	13.52871	18.51011	21.38448	21.90689	12.51109	15.14419	21.38078	46.04094	60.29268	57.66701	35.09739	19.44206	16.55622	15.48312	16.26136	14.26128	14.54860	11.96611	5.27459
Vis	ABASSL5	I79360237	3.35912	4.08584	5.24663	5.17612	3.63186	2.85674	3.14057	3.51093	4.41588	3.72683	2.24582	1.49121	2.14860	2.64470	2.81204	4.44651	2.50648	1.42699	1.22271	0.07228
Vis	ABASSL5	I2316	6.06314	8.29562	6.21067	3.87284	2.53552	4.09665	9.05168	13.53991	12.81528	7.16000	6.31837	5.54917	2.03832	1.85115	2.28102	1.87054	1.46226	2.09454	0.99340	0.28743
Vis	ABASSL5	I71232830	0.94712	3.81580	4.78483	3.94985	2.59526	1.33258	1.72817	6.73005	6.78732	6.22829	3.13518	5.04513	2.18738	0.81705	0.77555	1.80508	1.24833	0.25743	0.33319	0.06544
Vis	ABASSL5	I71610855	12.32597	14.15179	12.28652	13.49791	12.13402	7.60148	11.89716	20.77580	25.48128	21.41902	12.23330	10.59715	12.17150	9.58479	10.28057	9.40010	14.71371	11.70883	6.61180	2.63815
Vis	ABASSL5	I69671684	0.00000	0.22740	0.21517	0.61552	0.67600	0.34451	1.58243	0.97153	0.00300	0.00000	0.00000	0.00000	0.01822	0.35253	0.55429	2.23107	2.04734	1.15934	0.06206	0.00299
Vis	ABASSL5	I71489812	0.07577	0.38829	0.01461	0.07463	0.34392	0.13417	0.66150	2.97611	9.38143	6.84000	2.47651	0.53349	0.02383	1.09862	3.51186	1.40010	2.26619	0.52863	0.09859	0.87981
Vis	ABASSL5	I72283695	54.49013	60.75156	66.20393	59.11164	59.98278	54.19670	50.45271	60.71581	77.34249	100.08683	113.49843	109.61710	100.09813	106.91290	114.82162	140.83635	158.13042	84.59432	19.24824	2.14927
Vis	ABASSL5	I69736436	32.73481	37.05742	38.29719	36.90985	25.64909	28.95623	46.58088	51.29537	38.80979	25.30780	16.63883	11.46081	22.99486	38.98756	45.88549	45.91744	42.95846	35.01997	6.48107	0.31950
Vis	ABASSL5	I69752167	2.38990	1.67254	2.40562	1.40418	0.44564	0.44855	2.90543	7.55211	6.36795	3.13220	1.15866	0.31591	0.35467	0.10553	0.00000	0.05227	0.92273	1.87750	1.36752	0.20359
Vis	ABASSL5	I294041	3.80189	5.48096	5.07697	4.32478	3.37298	9.23024	28.41344	30.39349	24.01398	13.01317	7.29228	7.97957	11.43131	14.51889	19.91469	31.96287	29.65788	20.80648	8.16637	9.25920
Vis	ABASSL5	I70546287	7.93370	12.53042	14.24213	13.37373	11.68891	8.44969	20.08630	38.53279	31.91862	25.60488	8.60752	3.85606	6.37804	7.74240	10.82892	12.44748	13.73426	10.91966	3.17826	0.55304
Vis	ABASSL5	I69236748	1.68903	1.90449	0.98090	1.08358	2.41873	2.01819	0.74264	0.51398	0.67249	0.07561	0.02035	0.23848	0.22664	0.10968	0.21578	0.52614	1.28316	0.63959	1.98327	0.12703
Vis	ABASSL5	I70610412	0.00000	0.00000	0.00787	0.09254	0.36868	0.08300	0.42481	0.64057	1.71493	1.50341	0.19833	0.05178	0.40794	0.50691	0.97582	1.42452	1.40152	1.65468	0.85167	0.08939
Vis	ABASSL5	I69258220	0.13654	0.05514	0.04775	1.06806	1.47417	1.87152	0.76641	1.06507	0.71942	0.53659	0.00000	0.22423	0.11449	0.00000	0.00000	0.00000	0.00000	0.00000	0.00000	0.00000
Vis	ABASSL5	I71210577	12.08761	22.88971	29.76629	31.63224	22.54360	27.77828	64.63463	71.46162	45.83325	22.55561	12.78601	12.73729	22.04486	45.57742	63.81432	72.93942	70.35373	57.00178	11.45819	3.46450
Vis	ABASSL5	I70429154	0.93528	2.47300	2.68371	2.66388	2.99193	2.24161	5.04599	12.01118	14.75087	9.54439	4.08768	2.07268	0.56308	0.76820	1.32482	1.54128	2.62037	2.77097	0.62236	0.04063
Vis	ABASSL5	I71662897	0.18627	0.68334	0.99551	1.47343	1.13671	0.09494	1.48475	3.90747	3.54418	2.28244	1.20877	0.63468	0.58505	0.11982	0.02327	0.00782	0.48013	0.21305	0.78477	1.29042
Vis	ABASSL5	I71664132	0.02684	0.30699	1.69719	2.18507	1.65823	2.82717	3.49871	1.75750	1.08537	0.17024	0.28967	0.56580	0.55467	2.19770	1.92336	1.80703	2.68021	1.87084	1.39481	0.37297
Vis	ABASSL5	I69817432	28.55880	35.27118	37.49101	34.06448	30.69968	28.28937	26.19018	37.87036	41.25262	37.80683	27.91336	18.91544	19.06449	27.39078	30.81478	40.22472	36.30907	36.05903	19.21039	4.39692
Vis	ABASSL5	I69818000	6.74191	7.30984	7.70955	7.53134	6.10011	4.81865	13.06718	25.55923	29.45981	15.07220	6.18476	1.45273	2.37897	4.94424	6.16058	8.86908	13.41938	15.94851	8.13512	1.28443
Vis	ABASSL5	I72001864	14.10260	15.41387	6.17978	8.92299	11.39020	12.56794	17.85116	21.66955	25.85622	38.14829	56.78967	54.61330	34.76636	27.63272	21.30018	17.49096	12.06610	7.21882	4.70907	0.40077
Vis	ABASSL5	I940	1.90845	2.75782	2.57022	1.51881	0.59795	0.49801	1.32506	1.51551	1.15377	1.98000	0.27296	0.92257	0.16822	0.44147	1.63549	1.44700	2.63644	3.87883	2.61708	1.30496
Vis	ABASSL5	I69013314	0.40174	0.50540	0.45618	1.32537	2.94672	5.31893	5.26977	5.20488	4.52671	1.36390	0.36743	0.04086	0.00000	0.00000	0.00000	0.00000	0.03796	0.14825	0.72579	0.14457
Vis	ABASSL5	I71724696	0.19890	0.34053	0.02809	0.09194	0.24166	0.07561	0.47545	1.20183	2.77234	6.04293	6.76670	6.07648	2.34252	2.30737	1.80474	1.14509	1.05940	1.16112	0.74472	0.19974
Vis	ABASSL5	I68193019	73.43725	74.84252	72.49831	79.98507	78.19645	60.18761	66.99897	75.48704	79.50924	69.29024	62.33455	52.32779	69.34019	80.22074	83.74498	85.07377	86.21974	68.34842	15.55986	4.70060
Vis	ABASSL5	I71488819	0.00079	0.14099	0.39326	0.00239	0.16577	0.54179	0.35711	0.05440	0.00150	0.00000	0.00000	0.00000	0.00000	0.02258	0.43841	0.48559	0.00759	0.05237	0.28213	0.01754
Vis	ABASSL5	I69887529	0.00789	0.18647	0.50337	1.76239	8.92734	6.84366	7.47597	10.45857	11.23465	7.88732	7.11848	5.02423	3.23411	0.73272	0.73540	0.80264	1.88388	1.02308	0.60960	0.06630
Vis	ABASSL5	I70793947	2.75612	6.82263	9.54101	11.02090	9.91819	13.47868	14.39742	15.28216	17.97953	15.41512	13.49791	6.48694	3.51636	2.69816	3.12956	3.95896	3.35016	1.85841	0.77773	0.43926
Vis	ABASSL5	I69980208	0.58327	0.80557	1.01180	0.78090	2.53714	9.39966	14.87752	11.46873	3.03844	1.79854	0.28340	1.28219	2.26963	3.85346	5.75365	9.60723	10.03975	2.05948	1.12984	0.00000
Vis	ABASSL5	I69981085	7.23204	13.55486	18.02303	25.91881	22.53983	17.19386	26.93953	42.30554	43.07688	34.55317	26.71347	15.62755	22.84112	30.08157	34.57664	30.00830	26.94640	21.86862	6.74472	2.32207
Vis	ABASSL5	I68203444	19.02447	21.52587	32.55449	24.89493	21.54467	23.32689	37.45065	41.47433	31.07339	21.95512	18.63727	10.43040	13.27944	19.72028	24.71442	24.85296	24.42608	22.20905	9.59947	2.32378
Vis	ABASSL5	I68203484	5.19100	9.19557	14.46292	15.35522	15.76050	13.33826	19.66563	25.54550	27.35547	21.86829	15.78392	10.51021	7.14533	9.81336	11.36953	12.57694	17.83519	15.51087	15.66109	6.64628
Vis	ABASSL5	I75750439	43.97790	51.12962	51.71292	43.18746	32.67384	27.79420	38.07028	42.60295	49.58912	40.81902	29.47443	15.54679	15.93925	24.33871	31.85903	32.81974	39.98794	40.75189	16.52861	5.53935
Vis	ABASSL5	I71280676	0.77269	0.81069	2.03427	2.17970	1.07750	1.09721	3.50078	6.75343	5.54968	1.52634	0.76775	0.60523	1.43224	1.34470	1.48905	1.54177	0.39169	0.01154	0.00000	0.00000
Vis	ABASSL6	I70230975	23.66772	39.57362	46.47472	44.48597	25.87998	8.93576	1.73282	0.58210	0.06141	0.23024	2.37056	7.70736	16.19766	23.50276	25.91332	28.53444	18.24743	4.76787	0.09991	0.00000
Vis	ABASSL6	I80474700	10.40647	10.39170	12.95281	15.68299	13.02637	12.10858	11.57106	12.39858	12.75686	11.04537	9.38361	10.60190	12.92336	9.75392	9.99909	6.66194	5.73426	4.02264	2.90845	1.39136
Vis	ABASSL6	I68410285	15.91397	13.32405	14.77022	17.49373	17.84769	13.04093	16.46667	15.96950	20.69695	20.45024	16.70772	12.89929	9.82804	11.11198	14.41150	15.34929	13.62126	13.18597	5.47139	1.94226
Vis	ABASSL6	I69672605	1.87924	5.66231	8.89719	8.19582	6.20667	2.87493	2.87132	1.88104	0.39341	0.00098	0.00000	0.10831	0.80234	4.01475	9.71852	20.34343	21.98035	17.23480	2.40185	0.08854
Vis	ABASSL6	I70431325	3.31571	10.41330	13.47303	14.89134	12.23358	14.91870	9.47339	5.03711	1.32951	0.91317	0.83455	1.14109	0.15841	0.37235	0.00228	0.00049	0.19652	0.23391	0.57702	0.08554
Vis	ABASSL6	I76098396	32.82794	33.27345	33.64101	39.38687	34.14424	29.07618	22.59070	21.47280	18.98502	17.61317	16.53236	17.91116	18.66916	23.07143	29.42792	34.46605	26.20009	24.32401	13.33407	2.65612
Vis	ABASSL6	I1364	3.05841	5.90677	5.23876	0.62866	0.44026	0.10631	0.81292	1.08541	0.08937	0.14585	0.13883	0.26081	0.03271	0.04240	0.14370	0.00293	0.06387	0.06658	0.00836	0.00000
Vis	ABASSL6	I68300920	0.05288	0.54690	0.72360	0.41313	0.07535	0.27118	0.00000	0.00000	0.00000	0.00000	0.00000	0.00000	0.00000	0.00000	0.00000	0.00000	0.06521	0.41589	1.11180	0.93884
Vis	ABASSL6	I559	0.00000	0.00625	0.21517	0.16955	0.00000	0.00000	0.00000	0.00000	0.00000	0.00000	0.00678	0.16485	0.20047	0.54101	0.02007	0.05178	0.55918	0.13981	0.72447	0.12275
Vis	ABASSL6	I70303707	2.23441	2.84650	5.13989	4.80716	4.07966	4.77601	3.04341	1.41484	0.27958	0.71366	0.34395	1.33349	1.14626	2.28756	1.55246	0.73425	1.26396	1.68531	0.88600	0.33747
Vis	ABASSL6	I69671732	3.27940	2.72371	3.18371	4.42627	3.09957	3.08584	2.31421	1.56075	1.05442	0.09415	0.00000	0.31211	0.33505	0.00000	0.00000	0.00000	0.00000	0.00000	0.00000	0.00000
Vis	ABASSL6	I68744624	3.75059	7.50540	8.14663	9.06269	9.88913	7.44571	6.87080	8.29080	8.49226	6.42683	2.99687	2.74632	3.50514	3.02857	3.37774	5.50269	4.33006	3.07945	1.15845	0.40163
Vis	ABASSL6	I77800939	42.31650	53.03468	54.74663	48.05194	32.56835	24.74019	35.00982	38.85511	36.08737	32.28098	24.32307	24.72874	30.55000	34.32028	30.33714	27.93649	18.45601	11.96094	4.32790	0.23738
Vis	ABASSL6	I583869	0.22652	1.07277	0.53034	1.48597	0.53875	0.55316	0.46977	0.16218	0.34348	0.18683	0.01983	0.00048	0.04439	0.46774	0.05201	0.08354	0.16302	0.16334	0.05942	0.37297
Vis	ABASSL6	I68545545	107.07735	134.91927	124.09831	95.61134	57.91442	28.79932	22.88734	29.63040	24.46231	20.96244	10.08194	4.01093	5.70374	11.88986	15.39507	25.38935	38.64538	21.07013	6.51452	6.01540
Vis	ABASSL6	I67979027	0.00000	0.00000	0.00000	0.00000	0.00000	0.00000	0.00000	0.00000	0.00000	0.00000	0.00000	0.00000	0.00000	0.00000	0.00000	0.00000	0.00000	0.00000	0.00000	0.00000
Vis	ABASSL6b	I71789970	34.32202	60.69528	68.50562	54.63284	46.45748	32.07163	20.44806	24.71479	32.30904	21.79220	14.58090	15.72684	10.30888	15.82627	10.00684	10.22277	7.62171	11.28762	11.82262	7.15269
Vis	ABASSL6b	I69514410	3.01263	4.16259	4.53146	3.47881	4.40743	4.84309	5.65736	5.87850	2.87519	3.20244	3.22912	2.13919	1.28505	3.18479	4.46624	4.68002	3.86378	7.45095	6.94894	2.87254
Vis	ABASSL6b	I70723343	0.00000	0.00000	0.00000	0.00000	0.00000	0.00000	0.00000	0.00000	0.00000	0.00000	0.00000	0.00000	0.00000	0.00000	0.00000	0.00000	0.00000	0.00000	0.00000	0.00000
Vis	ABASSL6b	I69526934	3.20205	6.50597	1.93596	0.16896	0.27503	0.79136	0.26770	0.06355	0.56266	1.97415	1.52401	0.60428	0.04019	0.01244	0.15557	1.38593	3.64716	2.13937	1.65933	0.37382
Vis	ABASSL6b	I68157389	36.13023	40.67140	38.62921	38.35821	29.55328	20.47811	19.60000	19.43721	19.71343	17.42146	14.23382	16.71259	26.15561	37.13733	49.56478	56.47680	51.51630	37.67599	18.76276	5.33020
Vis	ABASSL6b	I69530917	1.98185	0.51620	0.03034	0.39582	0.42626	0.75441	1.06873	0.63955	1.12881	0.10927	0.00992	0.17957	0.76963	2.00138	2.24681	1.58671	2.63332	2.43631	1.64789	0.10265
Vis	ABASSL6b	I68795395	19.70955	20.20011	4.56180	1.15642	0.02745	0.00512	0.23204	0.13828	0.45082	0.33073	0.26305	0.42803	0.70187	0.54793	1.06797	0.66585	1.76775	1.62051	0.41505	0.27716
Vis	ABASSL6b	I68920656	46.81215	45.32518	45.88820	31.09134	14.18999	14.60148	22.43566	30.04982	23.99651	22.91463	20.66284	17.04798	18.50794	23.78479	27.54243	33.86566	31.00536	21.43142	8.54710	2.38794
Vis	ABASSL6b	I69734560	1.11287	1.09608	0.04551	0.02448	0.11141	0.04491	0.04238	0.41790	0.99251	0.69122	1.52714	1.65178	1.15841	0.92903	1.21031	1.56375	0.28361	0.00399	0.00000	0.00000
Vis	ABASSL6b	I68919886	0.48540	0.01819	0.00000	0.34627	0.05705	0.00000	0.07442	0.35231	0.04593	0.01122	0.00000	0.18337	0.40234	0.28710	0.35493	0.67465	0.38812	0.21838	0.00044	0.00000
Vis	ABASSL6b	I68845813	12.76006	20.79193	15.09438	12.08299	7.26642	5.26890	1.34522	0.83020	0.89616	0.99317	1.65658	1.79097	1.68551	2.03733	0.82391	0.36444	0.06789	0.00000	0.00440	0.35714
Vis	ABASSL6b	I75198208	6.25651	4.19045	2.89719	2.64179	2.54844	2.46106	2.50078	2.75241	2.94858	2.63317	2.55741	1.95724	2.33224	2.45300	2.10812	2.33073	1.96070	1.86196	0.93222	0.12831
Vis	ABASSL6b	I71570739	4.22257	0.75327	0.01742	0.03821	0.46771	0.20125	0.39173	1.04525	2.58213	0.98976	0.26879	0.64086	1.33131	1.75622	3.53513	11.11480	8.59491	4.03728	1.30634	0.00556
Vis	ABASSL6b	I70919059	33.53749	44.76293	43.24775	35.53194	26.75996	18.07732	18.22997	14.68988	11.79481	11.61902	13.06420	9.02375	8.81542	11.90184	14.43978	15.95994	18.02858	14.90013	8.30018	1.68263
Vis	ABASSL6b	I71234703	27.40884	4.11313	0.25393	0.58507	0.30032	0.02558	0.00103	0.08134	1.63954	2.99024	5.47547	3.15154	2.10514	0.92581	0.86907	1.31803	1.77669	1.08478	0.06778	0.00086
Vis	ABASSL6b	I68077018	3.25335	5.36669	7.71404	9.44597	7.81916	6.69642	2.33385	1.69649	0.19421	0.01561	0.00626	0.17197	0.87710	2.13963	3.63184	4.25647	6.98660	4.84332	1.32967	0.07399
Vis	ABASSL6b	I69816757	27.45304	14.24218	12.96629	10.84776	5.62702	2.47868	1.99328	0.52466	0.05492	0.05756	0.10177	0.00285	0.00000	0.00000	0.00000	0.00000	0.00000	0.00000	0.00000	0.00000
Vis	ABASSL6b	I954	0.51539	0.68789	1.01854	0.09731	0.68461	0.25014	0.10594	0.04270	0.00000	0.00000	0.00000	0.06556	0.23178	0.01198	0.00000	0.01124	0.08218	0.00444	0.00000	0.00000
Vis	ABASSL6b	I69873839	82.35675	75.96930	73.25225	64.34866	49.45963	37.39397	38.88527	35.09812	46.71493	47.93073	49.81472	48.45416	46.56495	43.30507	40.22035	46.12897	55.82448	66.22992	63.89305	9.76133
Vis	ABASSL6b	I69262284	43.32360	58.04946	60.23146	54.21970	48.89182	41.58897	33.60775	37.21607	35.62057	36.17366	38.26514	42.88409	40.01776	39.44747	37.33668	37.61065	44.61188	54.45273	31.09903	7.70317
Vis	ABASSL6b	I70795772	25.30939	31.93121	34.24775	22.53851	15.46448	8.62990	5.84703	2.56787	1.99151	1.30829	1.08246	0.69074	0.43364	0.46728	0.43248	0.40938	0.30951	0.26720	0.75132	0.44440
Vis	ABASSL6b	I80473469	4.47908	3.86185	1.53820	1.10627	1.51991	2.18533	1.60052	1.11998	0.99201	0.81268	0.79332	0.66176	2.03037	1.72028	0.57573	0.43674	0.80304	0.69729	1.01276	0.46022
Vis	ABASSL6b	I76098295	7.47119	4.94201	3.59045	4.21791	4.61787	4.69926	4.12765	3.88256	4.34498	4.89854	5.19781	5.13729	4.66028	3.87512	4.70073	3.56180	4.34122	2.88815	1.50352	1.01711
Vis	ABASSL6b	I70445275	7.04893	3.83798	0.55955	0.41672	0.65393	1.94599	0.40310	0.26792	1.45182	1.17902	2.73121	1.77577	1.71402	1.93548	2.13823	2.46556	6.46494	7.78784	3.73239	1.74979
