# Supplementary material for: Laminar and Dorsoventral Molecular Organization of the Medial Entorhinal Cortex Revealed by Large-scale Anatomical Analysis of Gene Expression
Source: PLoS Comput Biol. 2015 Jan 23;11(1):e1004032. doi: 10.1371/journal.pcbi.1004032 (PMC4304787; doi:10.1371/journal.pcbi.1004032)
Supplement: S6 Dataset — (XLS) [file pcbi.1004032.s013.xls]

## Sheet: README
Gene ontology terms used in Figure 6
Obtained using GOElite

## Sheet: GO
GO-Elite ORA Results
File:
Table:
Database: Based on OBO-Database version: 6/14/2011
colors:
6/19/2014
Mus musculus
Pvalues = true
Calculation Summary:
758 EntrezGene source identifiers supplied in the input file:AllReggenelistsLayerPatternedentrez.txt
722 source identifiers meeting the filter linked to a Ensembl ID.
719 genes meeting the criterion linked to a term.
9711 source identifiers in this dataset.
9057 source identifiers linked to a Ensembl ID.
9021 Genes linked to a term.
The z score is based on an N of 9021 and a R of 719 distinct genes in all terms.
Ontology-ID	Ontology Name	Ontology Type	Number Changed	Number Measured	Number in Ontology	Percent Changed	Percent Present	Z Score	FisherExactP	AdjustedP
GO:0031224	intrinsic to membrane	cellular_component	297	2258	6021	13.1532	37.5021	10.502	1.54262e-23	9.85889e-20
GO:0044425	membrane part	cellular_component	359	2932	7170	12.2442	40.8926	10.4001	7.06734e-24	9.03347e-20
GO:0016021	integral to membrane	cellular_component	279	2181	5873	12.7923	37.136	9.54838	9.87312e-20	3.15495e-16
GO:0016020	membrane	cellular_component	393	3449	6749	11.3946	51.1039	9.4475	1.65683e-20	7.0592e-17
GO:0043005	neuron projection	cellular_component	75	397	557	18.8917	71.2747	8.21715	7.2513e-13	1.85372e-09
GO:0030425	dendrite	cellular_component	44	191	268	23.0366	71.2687	7.77046	6.82677e-11	1.09075e-07
GO:0007155	cell adhesion	biological_process	54	263	472	20.5323	55.7203	7.63374	5.18969e-11	9.47638e-08
GO:0005509	calcium ion binding	molecular_function	61	326	626	18.7117	52.0767	7.29349	1.92011e-10	2.72698e-07
GO:0005216	ion channel activity	molecular_function	46	219	385	21.0046	56.8831	7.20975	6.71998e-10	7.0461e-07
GO:0031225	anchored to membrane	cellular_component	21	66	135	31.8182	48.8889	7.17945	1.82913e-08	1.169e-05
GO:0022838	substrate-specific channel activity	molecular_function	46	224	394	20.5357	56.8528	7.03131	1.45987e-09	1.16626e-06
GO:0022610	biological adhesion	biological_process	61	339	643	17.9941	52.7216	6.94584	9.90342e-10	9.04182e-07
GO:0022803	passive transmembrane transporter activity	molecular_function	46	233	408	19.7425	57.1078	6.72191	8.51533e-09	6.04683e-06
GO:0015267	channel activity	molecular_function	46	233	408	19.7425	57.1078	6.72191	8.51533e-09	6.04683e-06
GO:0005886	plasma membrane	cellular_component	181	1492	2900	12.1314	51.4483	6.49566	7.16627e-10	7.0461e-07
GO:0022836	gated channel activity	molecular_function	38	184	301	20.6522	61.1296	6.41715	3.43389e-08	2.09009e-05
GO:0045664	regulation of neuron differentiation	biological_process	42	213	341	19.7183	62.4633	6.40646	4.33615e-08	2.5193e-05
GO:0005261	cation channel activity	molecular_function	34	159	275	21.3836	57.8182	6.30046	7.47712e-08	3.8229e-05
GO:0042995	cell projection	cellular_component	97	681	1061	14.2438	64.1847	6.28638	9.56562e-09	6.43514e-06
GO:0022843	voltage-gated cation channel activity	molecular_function	23	90	149	25.5556	60.4027	6.19045	3.56709e-07	0.000116909
GO:0004683	calmodulin-dependent protein kinase activity	molecular_function	7	13	19	53.8462	68.4211	6.11144	2.22349e-05	0.00305598
GO:0045202	synapse	cellular_component	45	245	365	18.3673	67.1233	6.09182	1.03857e-07	4.57757e-05
GO:0034703	cation channel complex	cellular_component	20	74	117	27.027	63.2479	6.07754	7.86964e-07	0.000223533
GO:0022832	voltage-gated channel activity	molecular_function	27	119	196	22.6891	60.7143	5.96766	4.77248e-07	0.000148785
GO:0005244	voltage-gated ion channel activity	molecular_function	27	119	196	22.6891	60.7143	5.96766	4.77248e-07	0.000148785
GO:0051960	regulation of nervous system development	biological_process	49	283	457	17.3145	61.9256	5.897	1.5628e-07	5.87522e-05
GO:0045110	intermediate filament bundle assembly	biological_process	3	3	4	100	75	5.88621	0.000504374	0.0385724
GO:0017000	antibiotic biosynthetic process	biological_process	3	3	3	100	100	5.88621	0.000504374	0.0385724
GO:0016999	antibiotic metabolic process	biological_process	3	3	3	100	100	5.88621	0.000504374	0.0385724
GO:0014051	gamma-aminobutyric acid secretion	biological_process	3	3	4	100	75	5.88621	0.000504374	0.0385724
GO:0040011	locomotion	biological_process	63	400	662	15.75	60.423	5.87647	1.21865e-07	4.72025e-05
GO:0006811	ion transport	biological_process	69	452	861	15.2655	52.4971	5.87548	9.45e-08	4.31393e-05
GO:0007268	synaptic transmission	biological_process	25	108	164	23.1481	65.8537	5.85885	8.49638e-07	0.000236089
GO:0007411	axon guidance	biological_process	23	96	132	23.9583	72.7273	5.81472	1.2266e-06	0.000313569
GO:0046658	anchored to plasma membrane	cellular_component	7	14	29	50	48.2759	5.81075	4.14169e-05	0.00511
GO:0044459	plasma membrane part	cellular_component	128	1014	1987	12.6233	51.0317	5.80654	4.89316e-08	2.71932e-05
GO:0030030	cell projection organization	biological_process	47	271	456	17.3432	59.4298	5.78437	2.81286e-07	9.46156e-05
GO:0015075	ion transmembrane transporter activity	molecular_function	62	397	727	15.6171	54.608	5.7534	1.9572e-07	6.94915e-05
GO:0030424	axon	cellular_component	32	159	208	20.1258	76.4423	5.70962	7.6894e-07	0.000223377
GO:0045822	negative regulation of heart contraction	biological_process	5	8	18	62.5	44.4444	5.69699	0.000144949	0.0149414
GO:0043394	proteoglycan binding	molecular_function	5	8	16	62.5	50	5.69699	0.000144949	0.0149414
GO:0005249	voltage-gated potassium channel activity	molecular_function	17	62	104	27.4194	59.6154	5.67371	4.2557e-06	0.000863435
GO:0034705	potassium channel complex	cellular_component	14	46	75	30.4348	61.3333	5.63976	7.94772e-06	0.00132064
GO:0008076	voltage-gated potassium channel complex	cellular_component	14	46	75	30.4348	61.3333	5.63976	7.94772e-06	0.00132064
GO:0050767	regulation of neurogenesis	biological_process	44	253	416	17.3913	60.8173	5.6119	7.01633e-07	0.000211839
GO:0030001	metal ion transport	biological_process	47	278	531	16.9065	52.354	5.58787	7.12648e-07	0.000211839
GO:0006816	calcium ion transport	biological_process	23	100	173	23	57.8035	5.58015	2.61642e-06	0.000586721
GO:0007165	signal transduction	biological_process	172	1502	4234	11.4514	35.4747	5.456	2.08836e-07	7.21445e-05
GO:0005267	potassium channel activity	molecular_function	19	77	136	24.6753	56.6176	5.43537	6.48398e-06	0.00118965
GO:0044463	cell projection part	cellular_component	56	363	578	15.427	62.8028	5.35419	1.35921e-06	0.000340656
GO:0014047	glutamate secretion	biological_process	4	6	7	66.6667	85.7143	5.31014	0.00052699	0.0389363
GO:0060284	regulation of cell development	biological_process	48	297	503	16.1616	59.0457	5.30001	1.8395e-06	0.000452164
GO:0035235	ionotropic glutamate receptor signaling pathway	biological_process	7	16	23	43.75	69.5652	5.2888	0.000119783	0.0127589
GO:0044057	regulation of system process	biological_process	45	273	442	16.4835	61.7647	5.27379	2.16708e-06	0.00050363
GO:0021542	dentate gyrus development	biological_process	5	9	11	55.5556	81.8182	5.27333	0.000304738	0.0263187
GO:0034702	ion channel complex	cellular_component	24	113	186	21.2389	60.7527	5.24056	7.02747e-06	0.00126205
GO:0051239	regulation of multicellular organismal process	biological_process	112	901	1666	12.4306	54.0816	5.2102	9.81227e-07	0.000261293
GO:0007409	axonogenesis	biological_process	20	87	131	22.9885	66.4122	5.19705	1.17784e-05	0.00179228
GO:0006812	cation transport	biological_process	53	345	661	15.3623	52.1936	5.16911	3.48143e-06	0.000721979
GO:0048858	cell projection morphogenesis	biological_process	25	122	207	20.4918	58.9372	5.14124	8.87797e-06	0.00145485
GO:0070588	calcium ion transmembrane transport	biological_process	15	57	91	26.3158	62.6374	5.13001	2.66635e-05	0.00355014
GO:0007399	nervous system development	biological_process	36	205	307	17.561	66.7752	5.12853	5.36251e-06	0.00105452
GO:0010975	regulation of neuron projection development	biological_process	28	144	218	19.4444	66.055	5.12473	7.54116e-06	0.00132043
GO:0004872	receptor activity	molecular_function	84	632	2798	13.2911	22.5876	5.12137	1.91105e-06	0.000452352
GO:0032989	cellular component morphogenesis	biological_process	38	222	386	17.1171	57.513	5.09486	6.51508e-06	0.00118965
GO:0006935	chemotaxis	biological_process	32	175	296	18.2857	59.1216	5.08786	7.10903e-06	0.00126205
GO:0042597	periplasmic space	cellular_component	6	13	19	46.1538	68.4211	5.0867	0.000264579	0.0236493
GO:0030288	outer membrane-bounded periplasmic space	cellular_component	6	13	19	46.1538	68.4211	5.0867	0.000264579	0.0236493
GO:0005234	extracellular-glutamate-gated ion channel activity	molecular_function	6	13	18	46.1538	72.2222	5.0867	0.000264579	0.0236493
GO:0004970	ionotropic glutamate receptor activity	molecular_function	6	13	18	46.1538	72.2222	5.0867	0.000264579	0.0236493
GO:0097060	synaptic membrane	cellular_component	26	131	205	19.8473	63.9024	5.05586	1.0821e-05	0.00166644
GO:0032990	cell part morphogenesis	biological_process	26	131	227	19.8473	57.7093	5.05586	1.0821e-05	0.00166644
GO:0042330	taxis	biological_process	32	176	297	18.1818	59.2593	5.05127	7.95567e-06	0.00132064
GO:0022891	substrate-specific transmembrane transporter activity	molecular_function	65	458	836	14.1921	54.7847	5.04593	3.30081e-06	0.000703183
GO:0031175	neuron projection development	biological_process	19	83	112	22.8916	74.1071	5.04228	2.06858e-05	0.00293784
GO:0022857	transmembrane transporter activity	molecular_function	69	497	930	13.8833	53.4409	5.00688	3.50201e-06	0.000721979
GO:0030054	cell junction	cellular_component	59	408	697	14.4608	58.5366	4.95373	5.52426e-06	0.00106987
GO:0010976	positive regulation of neuron projection development	biological_process	12	42	65	28.5714	64.6154	4.94088	7.09202e-05	0.00820876
GO:0032502	developmental process	biological_process	200	1866	3463	10.7181	53.8839	4.92087	1.89193e-06	0.000452352
GO:0034394	protein localization at cell surface	biological_process	5	10	19	50	52.6316	4.90989	0.000569572	0.0416015
GO:0044456	synapse part	cellular_component	41	254	382	16.1417	66.4921	4.87744	1.57434e-05	0.00228673
GO:0048731	system development	biological_process	51	341	581	14.956	58.6919	4.85546	9.10483e-06	0.00147314
GO:2000380	regulation of mesoderm development	biological_process	2	2	8	100	25	4.8058	0.00634442	0.266193
GO:0071864	positive regulation of cell proliferation in bone marrow	biological_process	2	2	2	100	100	4.8058	0.00634442	0.266193
GO:0071863	regulation of cell proliferation in bone marrow	biological_process	2	2	2	100	100	4.8058	0.00634442	0.266193
GO:0071679	commissural neuron axon guidance	biological_process	2	2	3	100	66.6667	4.8058	0.00634442	0.266193
GO:0051531	NFAT protein import into nucleus	biological_process	2	2	2	100	100	4.8058	0.00634442	0.266193
GO:0042991	transcription factor import into nucleus	biological_process	2	2	2	100	100	4.8058	0.00634442	0.266193
GO:0042661	regulation of mesodermal cell fate specification	biological_process	2	2	6	100	33.3333	4.8058	0.00634442	0.266193
GO:0019896	axon transport of mitochondrion	biological_process	2	2	2	100	100	4.8058	0.00634442	0.266193
GO:0009931	calcium-dependent protein serine/threonine kinase activity	molecular_function	2	2	4	100	50	4.8058	0.00634442	0.266193
GO:0006851	mitochondrial calcium ion transport	biological_process	2	2	3	100	66.6667	4.8058	0.00634442	0.266193
GO:0004698	calcium-dependent protein kinase C activity	molecular_function	2	2	4	100	50	4.8058	0.00634442	0.266193
GO:0002135	CTP binding	molecular_function	2	2	2	100	100	4.8058	0.00634442	0.266193
GO:0002134	UTP binding	molecular_function	2	2	4	100	50	4.8058	0.00634442	0.266193
GO:0001888	glucuronyl-galactosyl-proteoglycan 4-alpha-N-acetylglucosaminyltransferase activity	molecular_function	2	2	2	100	100	4.8058	0.00634442	0.266193
GO:0043395	heparan sulfate proteoglycan binding	molecular_function	4	7	14	57.1429	50	4.80524	0.00115207	0.0745662
GO:0032279	asymmetric synapse	cellular_component	4	7	12	57.1429	58.3333	4.80524	0.00115207	0.0745662
GO:0005883	neurofilament	cellular_component	4	7	7	57.1429	100	4.80524	0.00115207	0.0745662
GO:0009653	anatomical structure morphogenesis	biological_process	79	604	1150	13.0795	52.5217	4.79947	7.83525e-06	0.00132064
GO:0007610	behavior	biological_process	42	266	426	15.7895	62.4413	4.77943	1.54069e-05	0.00228673
GO:0034765	regulation of ion transmembrane transport	biological_process	24	123	202	19.5122	60.8911	4.75867	3.1481e-05	0.0040239
GO:0016337	cell-cell adhesion	biological_process	28	153	280	18.3007	54.6429	4.75829	2.73198e-05	0.00360002
GO:0001948	glycoprotein binding	molecular_function	11	39	68	28.2051	57.3529	4.67571	0.000161068	0.0162108
GO:0060089	molecular transducer activity	molecular_function	97	791	3079	12.263	25.6902	4.66678	9.9592e-06	0.00157159
GO:0004871	signal transducer activity	molecular_function	97	791	3079	12.263	25.6902	4.66678	9.9592e-06	0.00157159
GO:0031644	regulation of neurological system process	biological_process	30	171	245	17.5439	69.7959	4.66662	3.91998e-05	0.00491227
GO:0008324	cation transmembrane transporter activity	molecular_function	46	305	557	15.082	54.7576	4.66515	2.11118e-05	0.0029654
GO:0050896	response to stimulus	biological_process	266	2653	6602	10.0264	40.1848	4.65385	4.83441e-06	0.000965523
GO:0008066	glutamate receptor activity	molecular_function	7	19	29	36.8421	65.5172	4.6514	0.000426679	0.0340863
GO:0048812	neuron projection morphogenesis	biological_process	22	111	176	19.8198	63.0682	4.63795	5.20271e-05	0.00627369
GO:0016477	cell migration	biological_process	42	273	454	15.3846	60.1322	4.59304	3.25371e-05	0.00411771
GO:0044462	external encapsulating structure part	cellular_component	6	15	24	40	62.5	4.5839	0.000671698	0.0479645
GO:0005215	transporter activity	molecular_function	78	609	1176	12.8079	51.7857	4.56447	1.81772e-05	0.00261057
GO:0031344	regulation of cell projection organization	biological_process	29	167	268	17.3653	62.3134	4.52466	6.18368e-05	0.0073869
GO:0007166	cell surface receptor linked signaling pathway	biological_process	98	812	3036	12.069	26.7457	4.52042	2.27386e-05	0.00309197
GO:0006140	regulation of nucleotide metabolic process	biological_process	37	233	396	15.8798	58.8384	4.51633	4.15772e-05	0.00511
GO:0070838	divalent metal ion transport	biological_process	24	129	226	18.6047	57.0796	4.49168	9.08488e-05	0.0101862
GO:0045595	regulation of cell differentiation	biological_process	67	508	917	13.189	55.398	4.47048	3.11448e-05	0.00402114
GO:0008328	ionotropic glutamate receptor complex	cellular_component	7	20	28	35	71.4286	4.468	0.000611697	0.0441104
GO:0005262	calcium channel activity	molecular_function	12	47	78	25.5319	60.2564	4.4568	0.00023137	0.0215072
GO:0072511	divalent inorganic cation transport	biological_process	24	130	229	18.4615	56.7686	4.44862	9.87718e-05	0.0108836
GO:0016358	dendrite development	biological_process	8	25	33	32	75.7576	4.44218	0.000498317	0.0385724
GO:0004888	transmembrane receptor activity	molecular_function	52	369	2272	14.0921	16.2412	4.43343	4.67396e-05	0.00568977
GO:0043269	regulation of ion transport	biological_process	32	194	323	16.4948	60.0619	4.43168	7.12856e-05	0.00820876
GO:0042391	regulation of membrane potential	biological_process	18	87	143	20.6897	60.8392	4.40154	0.000138597	0.0145209
GO:0002087	regulation of respiratory gaseous exchange by neurological system process	biological_process	4	8	13	50	61.5385	4.39105	0.00215919	0.127183
GO:0007267	cell-cell signaling	biological_process	29	171	267	16.9591	64.0449	4.38156	8.55576e-05	0.00967785
GO:0050807	regulation of synapse organization	biological_process	9	31	45	29.0323	68.8889	4.33713	0.000501888	0.0385724
GO:0015813	L-glutamate transport	biological_process	5	12	16	41.6667	75	4.31258	0.00156403	0.0965769
GO:0005246	calcium channel regulator activity	molecular_function	5	12	18	41.6667	66.6667	4.31258	0.00156403	0.0965769
GO:0023061	signal release	biological_process	13	55	101	23.6364	54.4554	4.30273	0.000294768	0.0256308
GO:0070509	calcium ion import	biological_process	3	5	8	60	62.5	4.29667	0.00446211	0.216862
GO:0043083	synaptic cleft	cellular_component	3	5	5	60	100	4.29667	0.00446211	0.216862
GO:0015812	gamma-aminobutyric acid transport	biological_process	3	5	6	60	83.3333	4.29667	0.00446211	0.216862
GO:0007635	chemosensory behavior	biological_process	3	5	8	60	62.5	4.29667	0.00446211	0.216862
GO:0006813	potassium ion transport	biological_process	18	89	158	20.2247	56.3291	4.28959	0.00018777	0.0186052
GO:0045761	regulation of adenylate cyclase activity	biological_process	12	49	87	24.4898	56.3218	4.28107	0.000352387	0.0292481
GO:0007156	homophilic cell adhesion	biological_process	14	62	106	22.5806	58.4906	4.26215	0.000290835	0.025462
GO:0022892	substrate-specific transporter activity	molecular_function	67	523	958	12.8107	54.5929	4.21092	8.22448e-05	0.00938619
GO:0023051	regulation of signaling	biological_process	106	919	1578	11.5343	58.2383	4.2092	6.28615e-05	0.00743978
GO:0048869	cellular developmental process	biological_process	113	993	1882	11.3797	52.763	4.20481	6.54813e-05	0.00767873
GO:0050804	regulation of synaptic transmission	biological_process	26	152	208	17.1053	73.0769	4.19367	0.000195272	0.0191997
GO:0045211	postsynaptic membrane	cellular_component	21	113	175	18.5841	64.5714	4.192	0.000278528	0.0245793
GO:0042596	fear response	biological_process	6	17	26	35.2941	65.3846	4.16342	0.00144638	0.0901835
GO:0007215	glutamate signaling pathway	biological_process	8	27	40	29.6296	67.5	4.16153	0.000886655	0.0602831
GO:0032879	regulation of localization	biological_process	86	717	1265	11.9944	56.6798	4.14658	9.50438e-05	0.0105639
GO:0051963	regulation of synaptogenesis	biological_process	7	22	30	31.8182	73.3333	4.13491	0.00116891	0.0747049
GO:0034220	ion transmembrane transport	biological_process	34	221	402	15.3846	54.9751	4.1203	0.00020457	0.0199604
GO:0051128	regulation of cellular component organization	biological_process	79	648	1093	12.1914	59.2864	4.11786	0.00011183	0.0120306
GO:0031279	regulation of cyclase activity	biological_process	12	51	90	23.5294	56.6667	4.11411	0.000523079	0.0389363
GO:0005516	calmodulin binding	molecular_function	16	78	123	20.5128	63.4146	4.10765	0.000356156	0.0293702
GO:0023052	signaling	biological_process	29	179	278	16.2011	64.3885	4.10674	0.000217019	0.0203966
GO:0031256	leading edge membrane	cellular_component	13	58	89	22.4138	65.1685	4.07438	0.000513011	0.0385724
GO:0046632	alpha-beta T cell differentiation	biological_process	5	13	26	38.4615	50	4.06195	0.00237618	0.135756
GO:0043576	regulation of respiratory gaseous exchange	biological_process	5	13	20	38.4615	65	4.06195	0.00237618	0.135756
GO:0015800	acidic amino acid transport	biological_process	5	13	19	38.4615	68.4211	4.06195	0.00237618	0.135756
GO:0050890	cognition	biological_process	22	124	175	17.7419	70.8571	4.04538	0.000314873	0.0267369
GO:0048786	presynaptic active zone	cellular_component	4	9	12	44.4444	75	4.04202	0.00364275	0.187749
GO:0044065	regulation of respiratory system process	biological_process	4	9	14	44.4444	64.2857	4.04202	0.00364275	0.187749
GO:0032314	regulation of Rac GTPase activity	biological_process	4	9	17	44.4444	52.9412	4.04202	0.00364275	0.187749
GO:0031103	axon regeneration	biological_process	4	9	18	44.4444	50	4.04202	0.00364275	0.187749
GO:0016594	glycine binding	molecular_function	4	9	15	44.4444	60	4.04202	0.00364275	0.187749
GO:0007413	axonal fasciculation	biological_process	4	9	11	44.4444	81.8182	4.04202	0.00364275	0.187749
GO:0007154	cell communication	biological_process	41	286	480	14.3357	59.5833	4.03903	0.000209899	0.0201724
GO:0060079	regulation of excitatory postsynaptic membrane potential	biological_process	8	28	37	28.5714	75.6757	4.03107	0.00115586	0.0745662
GO:0009605	response to external stimulus	biological_process	59	456	824	12.9386	55.3398	4.02003	0.000173486	0.0173242
GO:0043204	perikaryon	cellular_component	11	46	65	23.913	70.7692	4.00246	0.000766613	0.0532546
GO:0042177	negative regulation of protein catabolic process	biological_process	6	18	33	33.3333	54.5455	3.97691	0.00202496	0.120488
GO:0048870	cell motility	biological_process	42	298	503	14.094	59.2445	3.96907	0.00027883	0.0245793
GO:0007611	learning or memory	biological_process	21	118	163	17.7966	72.3926	3.96703	0.00042252	0.0340863
GO:0051716	cellular response to stimulus	biological_process	197	1946	5089	10.1233	38.2393	3.9597	0.000124974	0.0132018
GO:0043025	neuronal cell body	cellular_component	33	218	323	15.1376	67.4923	3.95523	0.000317948	0.0267369
GO:0009358	polyphosphate kinase complex	cellular_component	33	218	323	15.1376	67.4923	3.95523	0.000317948	0.0267369
GO:0051339	regulation of lyase activity	biological_process	12	53	93	22.6415	56.9892	3.95511	0.000758471	0.0529769
GO:0003008	system process	biological_process	55	421	2032	13.0641	20.7185	3.9522	0.000209415	0.0201724
GO:0051969	regulation of transmission of nerve impulse	biological_process	26	160	224	16.25	71.4286	3.90154	0.000525688	0.0389363
GO:0033267	axon part	cellular_component	21	120	161	17.5	74.5342	3.88019	0.000512599	0.0385724
GO:0022834	ligand-gated channel activity	molecular_function	15	75	117	20	64.1026	3.86254	0.000715008	0.0502156
GO:0015276	ligand-gated ion channel activity	molecular_function	15	75	117	20	64.1026	3.86254	0.000715008	0.0502156
GO:0008146	sulfotransferase activity	molecular_function	7	24	61	29.1667	39.3443	3.83902	0.0020613	0.121979
GO:0007616	long-term memory	biological_process	6	19	24	31.5789	79.1667	3.80348	0.00276263	0.152772
GO:0071526	semaphorin-plexin signaling pathway	biological_process	3	6	8	50	75	3.80234	0.00839723	0.320398
GO:0042403	thyroid hormone metabolic process	biological_process	3	6	14	50	42.8571	3.80234	0.00839723	0.320398
GO:0017154	semaphorin receptor activity	molecular_function	3	6	8	50	75	3.80234	0.00839723	0.320398
GO:0007213	muscarinic acetylcholine receptor signaling pathway	biological_process	3	6	9	50	66.6667	3.80234	0.00839723	0.320398
GO:0005954	calcium- and calmodulin-dependent protein kinase complex	cellular_component	3	6	6	50	100	3.80234	0.00839723	0.320398
GO:0050877	neurological system process	biological_process	43	315	1808	13.6508	17.4226	3.78909	0.000425487	0.0340863
GO:0005231	excitatory extracellular ligand-gated ion channel activity	molecular_function	8	30	48	26.6667	62.5	3.78718	0.0018877	0.114354
GO:0006873	cellular ion homeostasis	biological_process	34	233	438	14.5923	53.1963	3.78114	0.000512872	0.0385724
GO:2000310	regulation of N-methyl-D-aspartate selective glutamate receptor activity	biological_process	2	3	4	66.6667	75	3.75421	0.0180245	0.521243
GO:0072193	ureter smooth muscle cell differentiation	biological_process	2	3	3	66.6667	100	3.75421	0.0180245	0.521243
GO:0061333	renal tubule morphogenesis	biological_process	2	3	10	66.6667	30	3.75421	0.0180245	0.521243
GO:0060710	chorio-allantoic fusion	biological_process	2	3	6	66.6667	50	3.75421	0.0180245	0.521243
GO:0060665	regulation of branching involved in salivary gland morphogenesis by mesenchymal-epithelial signaling	biological_process	2	3	6	66.6667	50	3.75421	0.0180245	0.521243
GO:0050998	nitric-oxide synthase binding	molecular_function	2	3	8	66.6667	37.5	3.75421	0.0180245	0.521243
GO:0050798	activated T cell proliferation	biological_process	2	3	7	66.6667	42.8571	3.75421	0.0180245	0.521243
GO:0048012	hepatocyte growth factor receptor signaling pathway	biological_process	2	3	5	66.6667	60	3.75421	0.0180245	0.521243
GO:0046323	glucose import	biological_process	2	3	4	66.6667	75	3.75421	0.0180245	0.521243
GO:0045066	regulatory T cell differentiation	biological_process	2	3	5	66.6667	60	3.75421	0.0180245	0.521243
GO:0042048	olfactory behavior	biological_process	2	3	6	66.6667	50	3.75421	0.0180245	0.521243
GO:0033563	dorsal/ventral axon guidance	biological_process	2	3	4	66.6667	75	3.75421	0.0180245	0.521243
GO:0032564	dATP binding	molecular_function	2	3	4	66.6667	75	3.75421	0.0180245	0.521243
GO:0032557	pyrimidine ribonucleotide binding	molecular_function	2	3	5	66.6667	60	3.75421	0.0180245	0.521243
GO:0032435	negative regulation of proteasomal ubiquitin-dependent protein catabolic process	biological_process	2	3	12	66.6667	25	3.75421	0.0180245	0.521243
GO:0031133	regulation of axon diameter	biological_process	2	3	4	66.6667	75	3.75421	0.0180245	0.521243
GO:0030911	TPR domain binding	molecular_function	2	3	5	66.6667	60	3.75421	0.0180245	0.521243
GO:0030851	granulocyte differentiation	biological_process	2	3	13	66.6667	23.0769	3.75421	0.0180245	0.521243
GO:0030219	megakaryocyte differentiation	biological_process	2	3	7	66.6667	42.8571	3.75421	0.0180245	0.521243
GO:0022835	transmitter-gated channel activity	molecular_function	2	3	5	66.6667	60	3.75421	0.0180245	0.521243
GO:0022824	transmitter-gated ion channel activity	molecular_function	2	3	5	66.6667	60	3.75421	0.0180245	0.521243
GO:0016934	extracellular-glycine-gated chloride channel activity	molecular_function	2	3	5	66.6667	60	3.75421	0.0180245	0.521243
GO:0016933	extracellular-glycine-gated ion channel activity	molecular_function	2	3	5	66.6667	60	3.75421	0.0180245	0.521243
GO:0016907	G-protein coupled acetylcholine receptor activity	molecular_function	2	3	5	66.6667	60	3.75421	0.0180245	0.521243
GO:0010857	calcium-dependent protein kinase activity	molecular_function	2	3	5	66.6667	60	3.75421	0.0180245	0.521243
GO:0010269	response to selenium ion	biological_process	2	3	10	66.6667	30	3.75421	0.0180245	0.521243
GO:0009996	negative regulation of cell fate specification	biological_process	2	3	8	66.6667	37.5	3.75421	0.0180245	0.521243
GO:0007412	axon target recognition	biological_process	2	3	4	66.6667	75	3.75421	0.0180245	0.521243
GO:0006244	pyrimidine nucleotide catabolic process	biological_process	2	3	4	66.6667	75	3.75421	0.0180245	0.521243
GO:0004981	muscarinic acetylcholine receptor activity	molecular_function	2	3	5	66.6667	60	3.75421	0.0180245	0.521243
GO:0004971	alpha-amino-3-hydroxy-5-methyl-4-isoxazole propionate selective glutamate receptor activity	molecular_function	2	3	4	66.6667	75	3.75421	0.0180245	0.521243
GO:0003181	atrioventricular valve morphogenesis	biological_process	2	3	7	66.6667	42.8571	3.75421	0.0180245	0.521243
GO:0002906	negative regulation of mature B cell apoptosis	biological_process	2	3	5	66.6667	60	3.75421	0.0180245	0.521243
GO:0002905	regulation of mature B cell apoptosis	biological_process	2	3	5	66.6667	60	3.75421	0.0180245	0.521243
GO:0002674	negative regulation of acute inflammatory response	biological_process	2	3	10	66.6667	30	3.75421	0.0180245	0.521243
GO:0002361	CD4-positive, CD25-positive, alpha-beta regulatory T cell differentiation	biological_process	2	3	3	66.6667	100	3.75421	0.0180245	0.521243
GO:0071805	potassium ion transmembrane transport	biological_process	11	49	85	22.449	57.6471	3.75219	0.00134416	0.0846358
GO:0071804	cellular potassium ion transport	biological_process	11	49	85	22.449	57.6471	3.75219	0.00134416	0.0846358
GO:2000026	regulation of multicellular organismal development	biological_process	70	581	1058	12.0482	54.9149	3.75194	0.000456683	0.0362566
GO:0043367	CD4-positive, alpha-beta T cell differentiation	biological_process	4	10	15	40	66.6667	3.7417	0.00569154	0.258894
GO:0032281	alpha-amino-3-hydroxy-5-methyl-4-isoxazolepropionic acid selective glutamate receptor complex	cellular_component	4	10	13	40	76.9231	3.7417	0.00569154	0.258894
GO:0043197	dendritic spine	cellular_component	14	70	93	20	75.2688	3.73053	0.00106543	0.0701974
GO:0044297	cell body	cellular_component	34	235	349	14.4681	67.3352	3.72655	0.000566558	0.0416015
GO:0007193	inhibition of adenylate cyclase activity by G-protein signaling pathway	biological_process	6	20	33	30	60.6061	3.6415	0.00368446	0.189136
GO:0045428	regulation of nitric oxide biosynthetic process	biological_process	5	15	37	33.3333	40.5405	3.6298	0.00484862	0.229537
GO:0001662	behavioral fear response	biological_process	5	15	22	33.3333	68.1818	3.6298	0.00484862	0.229537
GO:0034762	regulation of transmembrane transport	biological_process	27	177	308	15.2542	57.4675	3.61353	0.00103673	0.0693793
GO:0044309	neuron spine	cellular_component	14	72	95	19.4444	75.7895	3.60912	0.00142007	0.0889768
GO:0060078	regulation of postsynaptic membrane potential	biological_process	8	32	44	25	72.7273	3.56311	0.00294309	0.160763
GO:0050801	ion homeostasis	biological_process	36	261	493	13.7931	52.9412	3.52455	0.00105199	0.0700342
GO:0048167	regulation of synaptic plasticity	biological_process	15	81	101	18.5185	80.198	3.52091	0.00163268	0.100331
GO:0065009	regulation of molecular function	biological_process	108	1001	1792	10.7892	55.8594	3.49232	0.000803289	0.0555007
GO:0001569	patterning of blood vessels	biological_process	6	21	38	28.5714	55.2632	3.48965	0.0048162	0.229537
GO:0060485	mesenchyme development	biological_process	4	11	27	36.3636	40.7407	3.47899	0.00838614	0.320398
GO:0045429	positive regulation of nitric oxide biosynthetic process	biological_process	4	11	28	36.3636	39.2857	3.47899	0.00838614	0.320398
GO:0035710	CD4-positive, alpha-beta T cell activation	biological_process	4	11	17	36.3636	64.7059	3.47899	0.00838614	0.320398
GO:0005003	ephrin receptor activity	molecular_function	4	11	14	36.3636	78.5714	3.47899	0.00838614	0.320398
GO:0051049	regulation of transport	biological_process	65	548	951	11.8613	57.6236	3.47006	0.00106534	0.0701974
GO:0065007	biological regulation	biological_process	378	4185	9534	9.03226	43.8955	3.46432	0.000596058	0.0432887
GO:0043195	terminal button	cellular_component	8	33	50	24.2424	66	3.45758	0.00361896	0.187749
GO:0007270	neuron-neuron synaptic transmission	biological_process	8	33	44	24.2424	75	3.45758	0.00361896	0.187749
GO:0005085	guanyl-nucleotide exchange factor activity	molecular_function	17	98	168	17.3469	58.3333	3.44594	0.00202162	0.120488
GO:0005544	calcium-dependent phospholipid binding	molecular_function	5	16	27	31.25	59.2593	3.4411	0.0065967	0.272877
GO:0005520	insulin-like growth factor binding	molecular_function	5	16	25	31.25	64	3.4411	0.0065967	0.272877
GO:0002209	behavioral defense response	biological_process	5	16	23	31.25	69.5652	3.4411	0.0065967	0.272877
GO:0042100	B cell proliferation	biological_process	3	7	15	42.8571	46.6667	3.40921	0.0138311	0.470184
GO:0050793	regulation of developmental process	biological_process	82	729	1304	11.2483	55.9049	3.40835	0.00127049	0.0807933
GO:2000541	positive regulation of protein geranylgeranylation	biological_process	1	1	2	100	50	3.39803	0.0797029	0.863358
GO:2000539	regulation of protein geranylgeranylation	biological_process	1	1	2	100	50	3.39803	0.0797029	0.863358
GO:2000384	negative regulation of ectoderm development	biological_process	1	1	1	100	100	3.39803	0.0797029	0.863358
GO:2000383	regulation of ectoderm development	biological_process	1	1	2	100	50	3.39803	0.0797029	0.863358
GO:2000172	regulation of branching morphogenesis of a nerve	biological_process	1	1	3	100	33.3333	3.39803	0.0797029	0.863358
GO:2000111	positive regulation of macrophage apoptosis	biological_process	1	1	2	100	50	3.39803	0.0797029	0.863358
GO:2000035	regulation of stem cell division	biological_process	1	1	2	100	50	3.39803	0.0797029	0.863358
GO:0097016	L27 domain binding	molecular_function	1	1	2	100	50	3.39803	0.0797029	0.863358
GO:0090298	negative regulation of mitochondrial DNA replication	biological_process	1	1	1	100	100	3.39803	0.0797029	0.863358
GO:0090296	regulation of mitochondrial DNA replication	biological_process	1	1	1	100	100	3.39803	0.0797029	0.863358
GO:0090238	positive regulation of arachidonic acid secretion	biological_process	1	1	3	100	33.3333	3.39803	0.0797029	0.863358
GO:0090237	regulation of arachidonic acid secretion	biological_process	1	1	4	100	25	3.39803	0.0797029	0.863358
GO:0090222	centrosome-templated microtubule nucleation	biological_process	1	1	1	100	100	3.39803	0.0797029	0.863358
GO:0072563	endothelial microparticle	cellular_component	1	1	2	100	50	3.39803	0.0797029	0.863358
GO:0072562	blood microparticle	cellular_component	1	1	2	100	50	3.39803	0.0797029	0.863358
GO:0072513	positive regulation of secondary heart field cardioblast proliferation	biological_process	1	1	3	100	33.3333	3.39803	0.0797029	0.863358
GO:0072368	regulation of lipid transport by negative regulation of transcription from an RNA polymerase II promoter	biological_process	1	1	1	100	100	3.39803	0.0797029	0.863358
GO:0072362	regulation of glycolysis by negative regulation of transcription from an RNA polymerase II promoter	biological_process	1	1	1	100	100	3.39803	0.0797029	0.863358
GO:0072303	positive regulation of glomerular metanephric mesangial cell proliferation	biological_process	1	1	1	100	100	3.39803	0.0797029	0.863358
GO:0072286	metanephric connecting tubule development	biological_process	1	1	1	100	100	3.39803	0.0797029	0.863358
GO:0072243	metanephric nephron epithelium development	biological_process	1	1	2	100	50	3.39803	0.0797029	0.863358
GO:0072234	metanephric nephron tubule development	biological_process	1	1	2	100	50	3.39803	0.0797029	0.863358
GO:0072195	kidney smooth muscle cell differentiation	biological_process	1	1	1	100	100	3.39803	0.0797029	0.863358
GO:0072180	mesonephric duct morphogenesis	biological_process	1	1	4	100	25	3.39803	0.0797029	0.863358
GO:0072172	mesonephric tubule formation	biological_process	1	1	4	100	25	3.39803	0.0797029	0.863358
GO:0072171	mesonephric tubule morphogenesis	biological_process	1	1	4	100	25	3.39803	0.0797029	0.863358
GO:0072170	metanephric tubule development	biological_process	1	1	4	100	25	3.39803	0.0797029	0.863358
GO:0072160	nephron tubule epithelial cell differentiation	biological_process	1	1	2	100	50	3.39803	0.0797029	0.863358
GO:0072105	ureteric peristalsis	biological_process	1	1	1	100	100	3.39803	0.0797029	0.863358
GO:0072102	glomerulus morphogenesis	biological_process	1	1	3	100	33.3333	3.39803	0.0797029	0.863358
GO:0072027	connecting tubule development	biological_process	1	1	1	100	100	3.39803	0.0797029	0.863358
GO:0071922	regulation of cohesin localization to chromatin	biological_process	1	1	3	100	33.3333	3.39803	0.0797029	0.863358
GO:0071895	odontoblast differentiation	biological_process	1	1	1	100	100	3.39803	0.0797029	0.863358
GO:0071866	negative regulation of apoptosis in bone marrow	biological_process	1	1	1	100	100	3.39803	0.0797029	0.863358
GO:0071865	regulation of apoptosis in bone marrow	biological_process	1	1	1	100	100	3.39803	0.0797029	0.863358
GO:0071665	gamma-catenin-TCF7L2 complex	cellular_component	1	1	1	100	100	3.39803	0.0797029	0.863358
GO:0071498	cellular response to fluid shear stress	biological_process	1	1	2	100	50	3.39803	0.0797029	0.863358
GO:0071459	protein localization to chromosome, centromeric region	biological_process	1	1	3	100	33.3333	3.39803	0.0797029	0.863358
GO:0071420	cellular response to histamine	biological_process	1	1	2	100	50	3.39803	0.0797029	0.863358
GO:0071279	cellular response to cobalt ion	biological_process	1	1	1	100	100	3.39803	0.0797029	0.863358
GO:0071110	histone biotinylation	biological_process	1	1	1	100	100	3.39803	0.0797029	0.863358
GO:0070885	negative regulation of calcineurin-NFAT signaling pathway	biological_process	1	1	1	100	100	3.39803	0.0797029	0.863358
GO:0070781	response to biotin	biological_process	1	1	2	100	50	3.39803	0.0797029	0.863358
GO:0070492	oligosaccharide binding	molecular_function	1	1	3	100	33.3333	3.39803	0.0797029	0.863358
GO:0070346	positive regulation of fat cell proliferation	biological_process	1	1	3	100	33.3333	3.39803	0.0797029	0.863358
GO:0070278	extracellular matrix constituent secretion	biological_process	1	1	1	100	100	3.39803	0.0797029	0.863358
GO:0070256	negative regulation of mucus secretion	biological_process	1	1	2	100	50	3.39803	0.0797029	0.863358
GO:0070171	negative regulation of tooth mineralization	biological_process	1	1	2	100	50	3.39803	0.0797029	0.863358
GO:0061141	lung ciliated cell differentiation	biological_process	1	1	1	100	100	3.39803	0.0797029	0.863358
GO:0061078	positive regulation of prostaglandin secretion involved in immune response	biological_process	1	1	1	100	100	3.39803	0.0797029	0.863358
GO:0060837	blood vessel endothelial cell differentiation	biological_process	1	1	1	100	100	3.39803	0.0797029	0.863358
GO:0060658	nipple morphogenesis	biological_process	1	1	1	100	100	3.39803	0.0797029	0.863358
GO:0060547	negative regulation of necrotic cell death	biological_process	1	1	4	100	25	3.39803	0.0797029	0.863358
GO:0060427	lung connective tissue development	biological_process	1	1	2	100	50	3.39803	0.0797029	0.863358
GO:0060422	peptidyl-dipeptidase inhibitor activity	molecular_function	1	1	1	100	100	3.39803	0.0797029	0.863358
GO:0060385	axonogenesis involved in innervation	biological_process	1	1	3	100	33.3333	3.39803	0.0797029	0.863358
GO:0060350	endochondral bone morphogenesis	biological_process	1	1	2	100	50	3.39803	0.0797029	0.863358
GO:0060297	regulation of sarcomere organization	biological_process	1	1	5	100	20	3.39803	0.0797029	0.863358
GO:0060117	auditory receptor cell development	biological_process	1	1	3	100	33.3333	3.39803	0.0797029	0.863358
GO:0060025	regulation of synaptic activity	biological_process	1	1	1	100	100	3.39803	0.0797029	0.863358
GO:0055106	ubiquitin-protein ligase regulator activity	molecular_function	1	1	4	100	25	3.39803	0.0797029	0.863358
GO:0055103	ligase regulator activity	molecular_function	1	1	4	100	25	3.39803	0.0797029	0.863358
GO:0055100	adiponectin binding	molecular_function	1	1	1	100	100	3.39803	0.0797029	0.863358
GO:0055096	low-density lipoprotein particle mediated signaling	biological_process	1	1	2	100	50	3.39803	0.0797029	0.863358
GO:0055095	lipoprotein particle mediated signaling	biological_process	1	1	2	100	50	3.39803	0.0797029	0.863358
GO:0051381	histamine binding	molecular_function	1	1	1	100	100	3.39803	0.0797029	0.863358
GO:0051089	constitutive protein ectodomain proteolysis	biological_process	1	1	1	100	100	3.39803	0.0797029	0.863358
GO:0050849	negative regulation of calcium-mediated signaling	biological_process	1	1	2	100	50	3.39803	0.0797029	0.863358
GO:0050509	N-acetylglucosaminyl-proteoglycan 4-beta-glucuronosyltransferase activity	molecular_function	1	1	2	100	50	3.39803	0.0797029	0.863358
GO:0050429	calcium-dependent phospholipase C activity	molecular_function	1	1	1	100	100	3.39803	0.0797029	0.863358
GO:0050290	sphingomyelin phosphodiesterase D activity	molecular_function	1	1	1	100	100	3.39803	0.0797029	0.863358
GO:0050178	phenylpyruvate tautomerase activity	molecular_function	1	1	1	100	100	3.39803	0.0797029	0.863358
GO:0048773	erythrophore differentiation	biological_process	1	1	1	100	100	3.39803	0.0797029	0.863358
GO:0048378	regulation of lateral mesodermal cell fate specification	biological_process	1	1	3	100	33.3333	3.39803	0.0797029	0.863358
GO:0048250	mitochondrial iron ion transport	biological_process	1	1	1	100	100	3.39803	0.0797029	0.863358
GO:0048227	plasma membrane to endosome transport	biological_process	1	1	1	100	100	3.39803	0.0797029	0.863358
GO:0047933	glucose-1,6-bisphosphate synthase activity	molecular_function	1	1	1	100	100	3.39803	0.0797029	0.863358
GO:0047874	dolichyldiphosphatase activity	molecular_function	1	1	1	100	100	3.39803	0.0797029	0.863358
GO:0047409	alkenylglycerophosphoethanolamine hydrolase activity	molecular_function	1	1	1	100	100	3.39803	0.0797029	0.863358
GO:0047408	alkenylglycerophosphocholine hydrolase activity	molecular_function	1	1	1	100	100	3.39803	0.0797029	0.863358
GO:0047394	glycerophosphoinositol inositolphosphodiesterase activity	molecular_function	1	1	1	100	100	3.39803	0.0797029	0.863358
GO:0047223	beta-1,3-galactosyl-O-glycosyl-glycoprotein beta-1,3-N-acetylglucosaminyltransferase activity	molecular_function	1	1	1	100	100	3.39803	0.0797029	0.863358
GO:0047127	thiomorpholine-carboxylate dehydrogenase activity	molecular_function	1	1	1	100	100	3.39803	0.0797029	0.863358
GO:0047017	prostaglandin-F synthase activity	molecular_function	1	1	1	100	100	3.39803	0.0797029	0.863358
GO:0046960	sensitization	biological_process	1	1	2	100	50	3.39803	0.0797029	0.863358
GO:0046958	nonassociative learning	biological_process	1	1	3	100	33.3333	3.39803	0.0797029	0.863358
GO:0046899	nucleoside triphosphate adenylate kinase activity	molecular_function	1	1	1	100	100	3.39803	0.0797029	0.863358
GO:0046582	Rap GTPase activator activity	molecular_function	1	1	2	100	50	3.39803	0.0797029	0.863358
GO:0046485	ether lipid metabolic process	biological_process	1	1	4	100	25	3.39803	0.0797029	0.863358
GO:0046079	dUMP catabolic process	biological_process	1	1	1	100	100	3.39803	0.0797029	0.863358
GO:0046077	dUDP metabolic process	biological_process	1	1	2	100	50	3.39803	0.0797029	0.863358
GO:0046048	UDP metabolic process	biological_process	1	1	2	100	50	3.39803	0.0797029	0.863358
GO:0046014	negative regulation of T cell homeostatic proliferation	biological_process	1	1	1	100	100	3.39803	0.0797029	0.863358
GO:0046013	regulation of T cell homeostatic proliferation	biological_process	1	1	3	100	33.3333	3.39803	0.0797029	0.863358
GO:0045713	low-density lipoprotein particle receptor biosynthetic process	biological_process	1	1	1	100	100	3.39803	0.0797029	0.863358
GO:0045340	mercury ion binding	molecular_function	1	1	2	100	50	3.39803	0.0797029	0.863358
GO:0045155	electron transporter, transferring electrons from CoQH2-cytochrome c reductase complex and cytochrome c oxidase complex activity	molecular_function	1	1	2	100	50	3.39803	0.0797029	0.863358
GO:0045112	integrin biosynthetic process	biological_process	1	1	1	100	100	3.39803	0.0797029	0.863358
GO:0045081	negative regulation of interleukin-10 biosynthetic process	biological_process	1	1	1	100	100	3.39803	0.0797029	0.863358
GO:0044302	dentate gyrus mossy fiber	cellular_component	1	1	1	100	100	3.39803	0.0797029	0.863358
GO:0043503	skeletal muscle fiber adaptation	biological_process	1	1	2	100	50	3.39803	0.0797029	0.863358
GO:0043486	histone exchange	biological_process	1	1	4	100	25	3.39803	0.0797029	0.863358
GO:0043314	negative regulation of neutrophil degranulation	biological_process	1	1	2	100	50	3.39803	0.0797029	0.863358
GO:0043313	regulation of neutrophil degranulation	biological_process	1	1	4	100	25	3.39803	0.0797029	0.863358
GO:0043257	laminin-8 complex	cellular_component	1	1	1	100	100	3.39803	0.0797029	0.863358
GO:0042662	negative regulation of mesodermal cell fate specification	biological_process	1	1	3	100	33.3333	3.39803	0.0797029	0.863358
GO:0042610	CD8 receptor binding	molecular_function	1	1	2	100	50	3.39803	0.0797029	0.863358
GO:0042323	negative regulation of circadian sleep/wake cycle, non-REM sleep	biological_process	1	1	2	100	50	3.39803	0.0797029	0.863358
GO:0042137	sequestering of neurotransmitter	biological_process	1	1	1	100	100	3.39803	0.0797029	0.863358
GO:0042103	positive regulation of T cell homeostatic proliferation	biological_process	1	1	1	100	100	3.39803	0.0797029	0.863358
GO:0035786	protein complex oligomerization	biological_process	1	1	1	100	100	3.39803	0.0797029	0.863358
GO:0035642	histone methyltransferase activity (H3-R17 specific)	molecular_function	1	1	1	100	100	3.39803	0.0797029	0.863358
GO:0035473	lipase binding	molecular_function	1	1	2	100	50	3.39803	0.0797029	0.863358
GO:0035248	alpha-1,4-N-acetylgalactosaminyltransferase activity	molecular_function	1	1	1	100	100	3.39803	0.0797029	0.863358
GO:0035063	nuclear speck organization	biological_process	1	1	1	100	100	3.39803	0.0797029	0.863358
GO:0034989	GTP-Ral binding	molecular_function	1	1	1	100	100	3.39803	0.0797029	0.863358
GO:0034971	histone H3-R17 methylation	biological_process	1	1	1	100	100	3.39803	0.0797029	0.863358
GO:0034970	histone H3-R2 methylation	biological_process	1	1	2	100	50	3.39803	0.0797029	0.863358
GO:0034724	DNA replication-independent nucleosome organization	biological_process	1	1	1	100	100	3.39803	0.0797029	0.863358
GO:0034597	phosphatidylinositol-4,5-bisphosphate 4-phosphatase activity	molecular_function	1	1	2	100	50	3.39803	0.0797029	0.863358
GO:0034596	phosphatidylinositol phosphate 4-phosphatase activity	molecular_function	1	1	2	100	50	3.39803	0.0797029	0.863358
GO:0034509	centromeric core chromatin assembly	biological_process	1	1	1	100	100	3.39803	0.0797029	0.863358
GO:0034238	macrophage fusion	biological_process	1	1	1	100	100	3.39803	0.0797029	0.863358
GO:0034119	negative regulation of erythrocyte aggregation	biological_process	1	1	1	100	100	3.39803	0.0797029	0.863358
GO:0034107	negative regulation of erythrocyte clearance	biological_process	1	1	1	100	100	3.39803	0.0797029	0.863358
GO:0034106	regulation of erythrocyte clearance	biological_process	1	1	1	100	100	3.39803	0.0797029	0.863358
GO:0034080	CenH3-containing nucleosome assembly at centromere	biological_process	1	1	1	100	100	3.39803	0.0797029	0.863358
GO:0034021	response to silicon dioxide	biological_process	1	1	1	100	100	3.39803	0.0797029	0.863358
GO:0033871	[heparan sulfate]-glucosamine 3-sulfotransferase 2 activity	molecular_function	1	1	1	100	100	3.39803	0.0797029	0.863358
GO:0033862	UMP kinase activity	molecular_function	1	1	2	100	50	3.39803	0.0797029	0.863358
GO:0033781	cholesterol 24-hydroxylase activity	molecular_function	1	1	1	100	100	3.39803	0.0797029	0.863358
GO:0033693	neurofilament bundle assembly	biological_process	1	1	1	100	100	3.39803	0.0797029	0.863358
GO:0033606	chemokine receptor transport within lipid bilayer	biological_process	1	1	1	100	100	3.39803	0.0797029	0.863358
GO:0033186	CAF-1 complex	cellular_component	1	1	3	100	33.3333	3.39803	0.0797029	0.863358
GO:0033031	positive regulation of neutrophil apoptosis	biological_process	1	1	2	100	50	3.39803	0.0797029	0.863358
GO:0033029	regulation of neutrophil apoptosis	biological_process	1	1	2	100	50	3.39803	0.0797029	0.863358
GO:0032913	negative regulation of transforming growth factor-beta3 production	biological_process	1	1	1	100	100	3.39803	0.0797029	0.863358
GO:0032900	negative regulation of neurotrophin production	biological_process	1	1	1	100	100	3.39803	0.0797029	0.863358
GO:0032899	regulation of neurotrophin production	biological_process	1	1	1	100	100	3.39803	0.0797029	0.863358
GO:0032696	negative regulation of interleukin-13 production	biological_process	1	1	2	100	50	3.39803	0.0797029	0.863358
GO:0032600	chemokine receptor transport out of membrane raft	biological_process	1	1	1	100	100	3.39803	0.0797029	0.863358
GO:0032599	protein transport out of membrane raft	biological_process	1	1	1	100	100	3.39803	0.0797029	0.863358
GO:0032597	B cell receptor transport into membrane raft	biological_process	1	1	1	100	100	3.39803	0.0797029	0.863358
GO:0032596	protein transport into membrane raft	biological_process	1	1	1	100	100	3.39803	0.0797029	0.863358
GO:0032595	B cell receptor transport within lipid bilayer	biological_process	1	1	1	100	100	3.39803	0.0797029	0.863358
GO:0032581	ER-dependent peroxisome organization	biological_process	1	1	1	100	100	3.39803	0.0797029	0.863358
GO:0032433	filopodium tip	cellular_component	1	1	2	100	50	3.39803	0.0797029	0.863358
GO:0032426	stereocilium bundle tip	cellular_component	1	1	3	100	33.3333	3.39803	0.0797029	0.863358
GO:0032425	positive regulation of mismatch repair	biological_process	1	1	1	100	100	3.39803	0.0797029	0.863358
GO:0032423	regulation of mismatch repair	biological_process	1	1	2	100	50	3.39803	0.0797029	0.863358
GO:0032244	positive regulation of nucleoside transport	biological_process	1	1	1	100	100	3.39803	0.0797029	0.863358
GO:0032242	regulation of nucleoside transport	biological_process	1	1	1	100	100	3.39803	0.0797029	0.863358
GO:0032237	activation of store-operated calcium channel activity	biological_process	1	1	4	100	25	3.39803	0.0797029	0.863358
GO:0032235	negative regulation of calcium ion transport via store-operated calcium channel activity	biological_process	1	1	2	100	50	3.39803	0.0797029	0.863358
GO:0032011	ARF protein signal transduction	biological_process	1	1	1	100	100	3.39803	0.0797029	0.863358
GO:0031997	N-terminal myristoylation domain binding	molecular_function	1	1	3	100	33.3333	3.39803	0.0797029	0.863358
GO:0031896	V2 vasopressin receptor binding	molecular_function	1	1	1	100	100	3.39803	0.0797029	0.863358
GO:0031893	vasopressin receptor binding	molecular_function	1	1	3	100	33.3333	3.39803	0.0797029	0.863358
GO:0031849	olfactory receptor binding	molecular_function	1	1	3	100	33.3333	3.39803	0.0797029	0.863358
GO:0031775	lutropin-choriogonadotropic hormone receptor binding	molecular_function	1	1	1	100	100	3.39803	0.0797029	0.863358
GO:0031635	inhibition of adenylate cyclase activity by opioid receptor signaling pathway	biological_process	1	1	1	100	100	3.39803	0.0797029	0.863358
GO:0031161	phosphatidylinositol catabolic process	biological_process	1	1	1	100	100	3.39803	0.0797029	0.863358
GO:0031055	chromatin remodeling at centromere	biological_process	1	1	3	100	33.3333	3.39803	0.0797029	0.863358
GO:0030934	anchoring collagen	cellular_component	1	1	5	100	20	3.39803	0.0797029	0.863358
GO:0030550	acetylcholine receptor inhibitor activity	molecular_function	1	1	1	100	100	3.39803	0.0797029	0.863358
GO:0030379	neurotensin receptor activity, non-G-protein coupled	molecular_function	1	1	1	100	100	3.39803	0.0797029	0.863358
GO:0030223	neutrophil differentiation	biological_process	1	1	2	100	50	3.39803	0.0797029	0.863358
GO:0021965	spinal cord ventral commissure morphogenesis	biological_process	1	1	2	100	50	3.39803	0.0797029	0.863358
GO:0021957	corticospinal tract morphogenesis	biological_process	1	1	1	100	100	3.39803	0.0797029	0.863358
GO:0021919	BMP signaling pathway involved in spinal cord dorsal/ventral patterning	biological_process	1	1	1	100	100	3.39803	0.0797029	0.863358
GO:0021837	motogenic signaling involved in postnatal olfactory bulb interneuron migration	biological_process	1	1	2	100	50	3.39803	0.0797029	0.863358
GO:0021754	facial nucleus development	biological_process	1	1	3	100	33.3333	3.39803	0.0797029	0.863358
GO:0021740	principal sensory nucleus of trigeminal nerve development	biological_process	1	1	1	100	100	3.39803	0.0797029	0.863358
GO:0021586	pons maturation	biological_process	1	1	1	100	100	3.39803	0.0797029	0.863358
GO:0021511	spinal cord patterning	biological_process	1	1	1	100	100	3.39803	0.0797029	0.863358
GO:0019406	hexitol biosynthetic process	biological_process	1	1	1	100	100	3.39803	0.0797029	0.863358
GO:0019153	protein-disulfide reductase (glutathione) activity	molecular_function	1	1	2	100	50	3.39803	0.0797029	0.863358
GO:0018271	biotin-protein ligase activity	molecular_function	1	1	1	100	100	3.39803	0.0797029	0.863358
GO:0017064	fatty acid amide hydrolase activity	molecular_function	1	1	1	100	100	3.39803	0.0797029	0.863358
GO:0016844	strictosidine synthase activity	molecular_function	1	1	2	100	50	3.39803	0.0797029	0.863358
GO:0016843	amine-lyase activity	molecular_function	1	1	2	100	50	3.39803	0.0797029	0.863358
GO:0016774	phosphotransferase activity, carboxyl group as acceptor	molecular_function	1	1	3	100	33.3333	3.39803	0.0797029	0.863358
GO:0016480	negative regulation of transcription from RNA polymerase III promoter	biological_process	1	1	2	100	50	3.39803	0.0797029	0.863358
GO:0016316	phosphatidylinositol-3,4-bisphosphate 4-phosphatase activity	molecular_function	1	1	2	100	50	3.39803	0.0797029	0.863358
GO:0015866	ADP transport	biological_process	1	1	1	100	100	3.39803	0.0797029	0.863358
GO:0015319	sodium	molecular_function	1	1	1	100	100	3.39803	0.0797029	0.863358
GO:0015014	heparan sulfate proteoglycan biosynthetic process, polysaccharide chain biosynthetic process	biological_process	1	1	3	100	33.3333	3.39803	0.0797029	0.863358
GO:0014908	myotube differentiation involved in skeletal muscle regeneration	biological_process	1	1	2	100	50	3.39803	0.0797029	0.863358
GO:0014849	ureter smooth muscle contraction	biological_process	1	1	1	100	100	3.39803	0.0797029	0.863358
GO:0014842	regulation of satellite cell proliferation	biological_process	1	1	1	100	100	3.39803	0.0797029	0.863358
GO:0010963	regulation of L-arginine import	biological_process	1	1	2	100	50	3.39803	0.0797029	0.863358
GO:0010958	regulation of amino acid import	biological_process	1	1	2	100	50	3.39803	0.0797029	0.863358
GO:0010577	metalloenzyme activator activity	molecular_function	1	1	2	100	50	3.39803	0.0797029	0.863358
GO:0010465	nerve growth factor receptor activity	molecular_function	1	1	2	100	50	3.39803	0.0797029	0.863358
GO:0010459	negative regulation of heart rate	biological_process	1	1	7	100	14.2857	3.39803	0.0797029	0.863358
GO:0010260	organ senescence	biological_process	1	1	1	100	100	3.39803	0.0797029	0.863358
GO:0009992	cellular water homeostasis	biological_process	1	1	2	100	50	3.39803	0.0797029	0.863358
GO:0009305	protein biotinylation	biological_process	1	1	1	100	100	3.39803	0.0797029	0.863358
GO:0009222	pyrimidine ribonucleotide catabolic process	biological_process	1	1	1	100	100	3.39803	0.0797029	0.863358
GO:0009195	pyrimidine ribonucleoside diphosphate catabolic process	biological_process	1	1	1	100	100	3.39803	0.0797029	0.863358
GO:0009193	pyrimidine ribonucleoside diphosphate metabolic process	biological_process	1	1	2	100	50	3.39803	0.0797029	0.863358
GO:0009178	pyrimidine deoxyribonucleoside monophosphate catabolic process	biological_process	1	1	1	100	100	3.39803	0.0797029	0.863358
GO:0009159	deoxyribonucleoside monophosphate catabolic process	biological_process	1	1	2	100	50	3.39803	0.0797029	0.863358
GO:0009140	pyrimidine nucleoside diphosphate catabolic process	biological_process	1	1	1	100	100	3.39803	0.0797029	0.863358
GO:0009131	pyrimidine nucleoside monophosphate catabolic process	biological_process	1	1	1	100	100	3.39803	0.0797029	0.863358
GO:0009041	uridylate kinase activity	molecular_function	1	1	2	100	50	3.39803	0.0797029	0.863358
GO:0008892	guanine deaminase activity	molecular_function	1	1	1	100	100	3.39803	0.0797029	0.863358
GO:0008582	regulation of synaptic growth at neuromuscular junction	biological_process	1	1	2	100	50	3.39803	0.0797029	0.863358
GO:0008355	olfactory learning	biological_process	1	1	3	100	33.3333	3.39803	0.0797029	0.863358
GO:0008061	chitin binding	molecular_function	1	1	4	100	25	3.39803	0.0797029	0.863358
GO:0007521	muscle cell fate determination	biological_process	1	1	2	100	50	3.39803	0.0797029	0.863358
GO:0007296	vitellogenesis	biological_process	1	1	1	100	100	3.39803	0.0797029	0.863358
GO:0007207	activation of phospholipase C activity by muscarinic acetylcholine receptor signaling pathway	biological_process	1	1	1	100	100	3.39803	0.0797029	0.863358
GO:0007197	inhibition of adenylate cyclase activity by muscarinic acetylcholine receptor signaling pathway	biological_process	1	1	1	100	100	3.39803	0.0797029	0.863358
GO:0007144	female meiosis I	biological_process	1	1	3	100	33.3333	3.39803	0.0797029	0.863358
GO:0007109	cytokinesis, completion of separation	biological_process	1	1	2	100	50	3.39803	0.0797029	0.863358
GO:0006756	AMP phosphorylation	biological_process	1	1	1	100	100	3.39803	0.0797029	0.863358
GO:0006336	DNA replication-independent nucleosome assembly	biological_process	1	1	1	100	100	3.39803	0.0797029	0.863358
GO:0006256	UDP catabolic process	biological_process	1	1	1	100	100	3.39803	0.0797029	0.863358
GO:0006227	dUDP biosynthetic process	biological_process	1	1	2	100	50	3.39803	0.0797029	0.863358
GO:0006123	mitochondrial electron transport, cytochrome c to oxygen	biological_process	1	1	3	100	33.3333	3.39803	0.0797029	0.863358
GO:0006061	sorbitol biosynthetic process	biological_process	1	1	1	100	100	3.39803	0.0797029	0.863358
GO:0005943	1-phosphatidylinositol-4-phosphate 3-kinase, class IA complex	cellular_component	1	1	1	100	100	3.39803	0.0797029	0.863358
GO:0005862	muscle thin filament tropomyosin	cellular_component	1	1	2	100	50	3.39803	0.0797029	0.863358
GO:0005595	collagen type XII	cellular_component	1	1	1	100	100	3.39803	0.0797029	0.863358
GO:0005593	FACIT collagen	cellular_component	1	1	4	100	25	3.39803	0.0797029	0.863358
GO:0005588	collagen type V	cellular_component	1	1	3	100	33.3333	3.39803	0.0797029	0.863358
GO:0005471	ATP	molecular_function	1	1	2	100	50	3.39803	0.0797029	0.863358
GO:0005169	neurotrophin TRKB receptor binding	molecular_function	1	1	1	100	100	3.39803	0.0797029	0.863358
GO:0005105	type 1 fibroblast growth factor receptor binding	molecular_function	1	1	5	100	20	3.39803	0.0797029	0.863358
GO:0004991	parathyroid hormone receptor activity	molecular_function	1	1	2	100	50	3.39803	0.0797029	0.863358
GO:0004988	mu-opioid receptor activity	molecular_function	1	1	1	100	100	3.39803	0.0797029	0.863358
GO:0004979	beta-endorphin receptor activity	molecular_function	1	1	1	100	100	3.39803	0.0797029	0.863358
GO:0004937	alpha1-adrenergic receptor activity	molecular_function	1	1	3	100	33.3333	3.39803	0.0797029	0.863358
GO:0004936	alpha-adrenergic receptor activity	molecular_function	1	1	6	100	16.6667	3.39803	0.0797029	0.863358
GO:0004910	interleukin-1, Type II, blocking receptor activity	molecular_function	1	1	2	100	50	3.39803	0.0797029	0.863358
GO:0004741	[pyruvate dehydrogenase (lipoamide)] phosphatase activity	molecular_function	1	1	2	100	50	3.39803	0.0797029	0.863358
GO:0004692	cGMP-dependent protein kinase activity	molecular_function	1	1	2	100	50	3.39803	0.0797029	0.863358
GO:0004618	phosphoglycerate kinase activity	molecular_function	1	1	2	100	50	3.39803	0.0797029	0.863358
GO:0004598	peptidylamidoglycolate lyase activity	molecular_function	1	1	1	100	100	3.39803	0.0797029	0.863358
GO:0004504	peptidylglycine monooxygenase activity	molecular_function	1	1	1	100	100	3.39803	0.0797029	0.863358
GO:0004489	methylenetetrahydrofolate reductase (NADPH) activity	molecular_function	1	1	1	100	100	3.39803	0.0797029	0.863358
GO:0004359	glutaminase activity	molecular_function	1	1	2	100	50	3.39803	0.0797029	0.863358
GO:0004127	cytidylate kinase activity	molecular_function	1	1	4	100	25	3.39803	0.0797029	0.863358
GO:0004080	biotin-[propionyl-CoA-carboxylase (ATP-hydrolyzing)] ligase activity	molecular_function	1	1	1	100	100	3.39803	0.0797029	0.863358
GO:0004079	biotin-[methylmalonyl-CoA-carboxytransferase] ligase activity	molecular_function	1	1	1	100	100	3.39803	0.0797029	0.863358
GO:0004078	biotin-[methylcrotonoyl-CoA-carboxylase] ligase activity	molecular_function	1	1	1	100	100	3.39803	0.0797029	0.863358
GO:0004077	biotin-[acetyl-CoA-carboxylase] ligase activity	molecular_function	1	1	1	100	100	3.39803	0.0797029	0.863358
GO:0004064	arylesterase activity	molecular_function	1	1	4	100	25	3.39803	0.0797029	0.863358
GO:0004053	arginase activity	molecular_function	1	1	2	100	50	3.39803	0.0797029	0.863358
GO:0004040	amidase activity	molecular_function	1	1	2	100	50	3.39803	0.0797029	0.863358
GO:0003844	1,4-alpha-glucan branching enzyme activity	molecular_function	1	1	1	100	100	3.39803	0.0797029	0.863358
GO:0003827	alpha-1,3-mannosylglycoprotein 2-beta-N-acetylglucosaminyltransferase activity	molecular_function	1	1	2	100	50	3.39803	0.0797029	0.863358
GO:0003221	right ventricular cardiac muscle tissue morphogenesis	biological_process	1	1	2	100	50	3.39803	0.0797029	0.863358
GO:0003195	tricuspid valve formation	biological_process	1	1	4	100	25	3.39803	0.0797029	0.863358
GO:0003192	mitral valve formation	biological_process	1	1	3	100	33.3333	3.39803	0.0797029	0.863358
GO:0003188	heart valve formation	biological_process	1	1	7	100	14.2857	3.39803	0.0797029	0.863358
GO:0003185	sinoatrial valve morphogenesis	biological_process	1	1	1	100	100	3.39803	0.0797029	0.863358
GO:0003160	endocardium morphogenesis	biological_process	1	1	1	100	100	3.39803	0.0797029	0.863358
GO:0003138	primary heart field specification	biological_process	1	1	1	100	100	3.39803	0.0797029	0.863358
GO:0003091	renal water homeostasis	biological_process	1	1	2	100	50	3.39803	0.0797029	0.863358
GO:0003069	vasodilation by acetylcholine involved in regulation of systemic arterial blood pressure	biological_process	1	1	1	100	100	3.39803	0.0797029	0.863358
GO:0003065	positive regulation of heart rate by epinephrine	biological_process	1	1	1	100	100	3.39803	0.0797029	0.863358
GO:0003062	regulation of heart rate by chemical signal	biological_process	1	1	2	100	50	3.39803	0.0797029	0.863358
GO:0003026	regulation of systemic arterial blood pressure by aortic arch baroreceptor feedback	biological_process	1	1	1	100	100	3.39803	0.0797029	0.863358
GO:0002522	leukocyte migration involved in immune response	biological_process	1	1	1	100	100	3.39803	0.0797029	0.863358
GO:0002502	peptide antigen assembly with MHC class I protein complex	biological_process	1	1	1	100	100	3.39803	0.0797029	0.863358
GO:0002501	peptide antigen assembly with MHC protein complex	biological_process	1	1	1	100	100	3.39803	0.0797029	0.863358
GO:0002159	desmosome assembly	biological_process	1	1	1	100	100	3.39803	0.0797029	0.863358
GO:0001994	norepinephrine-epinephrine vasoconstriction involved in regulation of systemic arterial blood pressure	biological_process	1	1	3	100	33.3333	3.39803	0.0797029	0.863358
GO:0001986	negative regulation of the force of heart contraction involved in baroreceptor response to increased systemic arterial blood pressure	biological_process	1	1	1	100	100	3.39803	0.0797029	0.863358
GO:0001878	response to yeast	biological_process	1	1	7	100	14.2857	3.39803	0.0797029	0.863358
GO:0001842	neural fold formation	biological_process	1	1	4	100	25	3.39803	0.0797029	0.863358
GO:0001590	dopamine D1 receptor activity	molecular_function	1	1	1	100	100	3.39803	0.0797029	0.863358
GO:0001588	dopamine receptor activity, coupled via Gs	molecular_function	1	1	2	100	50	3.39803	0.0797029	0.863358
GO:0001537	N-acetylgalactosamine 4-O-sulfotransferase activity	molecular_function	1	1	5	100	20	3.39803	0.0797029	0.863358
GO:0001315	age-dependent response to reactive oxygen species	biological_process	1	1	1	100	100	3.39803	0.0797029	0.863358
GO:0001093	TFIIB-class transcription factor binding	molecular_function	1	1	1	100	100	3.39803	0.0797029	0.863358
GO:0001091	RNA polymerase II basal transcription factor binding	molecular_function	1	1	1	100	100	3.39803	0.0797029	0.863358
GO:0001087	TFIIB-class binding transcription factor activity	molecular_function	1	1	1	100	100	3.39803	0.0797029	0.863358
GO:0001083	RNA polymerase II basal transcription factor binding transcription factor activity	molecular_function	1	1	1	100	100	3.39803	0.0797029	0.863358
GO:0001011	sequence-specific DNA binding RNA polymerase recruiting transcription factor activity	molecular_function	1	1	1	100	100	3.39803	0.0797029	0.863358
GO:0000774	adenyl-nucleotide exchange factor activity	molecular_function	1	1	2	100	50	3.39803	0.0797029	0.863358
GO:0000435	positive regulation of transcription from RNA polymerase II promoter by galactose	biological_process	1	1	1	100	100	3.39803	0.0797029	0.863358
GO:0000431	regulation of transcription from RNA polymerase II promoter by galactose	biological_process	1	1	1	100	100	3.39803	0.0797029	0.863358
GO:0000415	negative regulation of histone H3-K36 methylation	biological_process	1	1	1	100	100	3.39803	0.0797029	0.863358
GO:0000414	regulation of histone H3-K36 methylation	biological_process	1	1	2	100	50	3.39803	0.0797029	0.863358
GO:0000411	positive regulation of transcription by galactose	biological_process	1	1	1	100	100	3.39803	0.0797029	0.863358
GO:0000409	regulation of transcription by galactose	biological_process	1	1	1	100	100	3.39803	0.0797029	0.863358
GO:0055082	cellular chemical homeostasis	biological_process	34	248	468	13.7097	52.9915	3.38391	0.00177587	0.108608
GO:0031253	cell projection membrane	cellular_component	16	92	167	17.3913	55.0898	3.35345	0.00275102	0.152772
GO:0010226	response to lithium ion	biological_process	6	22	29	27.2727	75.8621	3.34679	0.00618394	0.266193
GO:0044464	cell part	cellular_component	635	7571	16542	8.38727	45.7683	3.34122	0.00068768	0.0488329
GO:0050794	regulation of cellular process	biological_process	345	3797	8709	9.08612	43.5986	3.33594	0.000934533	0.0632021
GO:0016782	transferase activity, transferring sulfur-containing groups	molecular_function	7	28	71	25	39.4366	3.33224	0.00533102	0.245112
GO:0030165	PDZ domain binding	molecular_function	12	62	106	19.3548	58.4906	3.32112	0.00316966	0.170711
GO:0042113	B cell activation	biological_process	9	41	88	21.9512	46.5909	3.31277	0.00424856	0.210485
GO:0031226	intrinsic to plasma membrane	cellular_component	30	214	510	14.0187	41.9608	3.30625	0.00202668	0.120488
GO:0042692	muscle cell differentiation	biological_process	11	55	97	20	56.701	3.30399	0.00356333	0.187749
GO:0030808	regulation of nucleotide biosynthetic process	biological_process	13	70	127	18.5714	55.1181	3.28752	0.00317862	0.170711
GO:0030802	regulation of cyclic nucleotide biosynthetic process	biological_process	13	70	127	18.5714	55.1181	3.28752	0.00317862	0.170711
GO:0048747	muscle fiber development	biological_process	5	17	27	29.4118	62.963	3.26711	0.00874267	0.329643
GO:0046631	alpha-beta T cell activation	biological_process	5	17	34	29.4118	50	3.26711	0.00874267	0.329643
GO:0007157	heterophilic cell-cell adhesion	biological_process	5	17	26	29.4118	65.3846	3.26711	0.00874267	0.329643
GO:0000987	core promoter proximal region sequence-specific DNA binding	molecular_function	5	17	30	29.4118	56.6667	3.26711	0.00874267	0.329643
GO:0043087	regulation of GTPase activity	biological_process	22	144	236	15.2778	61.0169	3.26376	0.00277289	0.152772
GO:0033555	multicellular organismal response to stress	biological_process	8	35	58	22.8571	60.3448	3.25804	0.005325	0.245112
GO:0072529	pyrimidine-containing compound catabolic process	biological_process	4	12	17	33.3333	70.5882	3.24605	0.0117972	0.413128
GO:0071300	cellular response to retinoic acid	biological_process	4	12	31	33.3333	38.7097	3.24605	0.0117972	0.413128
GO:0071299	cellular response to vitamin A	biological_process	4	12	32	33.3333	37.5	3.24605	0.0117972	0.413128
GO:0050919	negative chemotaxis	biological_process	4	12	15	33.3333	80	3.24605	0.0117972	0.413128
GO:0048583	regulation of response to stimulus	biological_process	100	938	1723	10.661	54.4399	3.21426	0.00217227	0.127367
GO:0031280	negative regulation of cyclase activity	biological_process	6	23	36	26.087	63.8889	3.21197	0.00781371	0.312109
GO:0007194	negative regulation of adenylate cyclase activity	biological_process	6	23	36	26.087	63.8889	3.21197	0.00781371	0.312109
GO:0044421	extracellular region part	cellular_component	55	462	1128	11.9048	40.9574	3.20552	0.00256632	0.144505
GO:0030817	regulation of cAMP biosynthetic process	biological_process	12	64	117	18.75	54.7009	3.19535	0.00416265	0.20784
GO:0030814	regulation of cAMP metabolic process	biological_process	12	64	119	18.75	53.7815	3.19535	0.00416265	0.20784
GO:0019838	growth factor binding	molecular_function	12	64	115	18.75	55.6522	3.19535	0.00416265	0.20784
GO:0033124	regulation of GTP catabolic process	biological_process	22	146	239	15.0685	61.0879	3.19259	0.00313193	0.17035
GO:0032501	multicellular organismal process	biological_process	123	1196	3771	10.2843	31.7157	3.17239	0.00232926	0.13533
GO:0005802	trans-Golgi network	cellular_component	11	57	96	19.2982	59.375	3.16767	0.00475101	0.227444
GO:0030154	cell differentiation	biological_process	80	726	1390	11.0193	52.2302	3.16314	0.0025961	0.145541
GO:0045807	positive regulation of endocytosis	biological_process	9	43	72	20.9302	59.7222	3.14521	0.00592765	0.266193
GO:0007626	locomotory behavior	biological_process	17	105	155	16.1905	67.7419	3.12819	0.00528127	0.244584
GO:0050789	regulation of biological process	biological_process	361	4028	9195	8.96226	43.8064	3.12439	0.00199273	0.120147
GO:0048856	anatomical structure development	biological_process	116	1123	2046	10.3295	54.8876	3.11957	0.00261784	0.146119
GO:0031300	intrinsic to organelle membrane	cellular_component	16	97	168	16.4948	57.7381	3.11659	0.00427108	0.210783
GO:0030799	regulation of cyclic nucleotide metabolic process	biological_process	13	73	134	17.8082	54.4776	3.11605	0.00690151	0.284565
GO:0035335	peptidyl-tyrosine dephosphorylation	biological_process	7	30	49	23.3333	61.2245	3.11197	0.00797458	0.316556
GO:0009187	cyclic nucleotide metabolic process	biological_process	7	30	53	23.3333	56.6038	3.11197	0.00797458	0.316556
GO:0051130	positive regulation of cellular component organization	biological_process	34	259	443	13.1274	58.465	3.10927	0.00341803	0.1828
GO:0016323	basolateral plasma membrane	cellular_component	14	81	150	17.284	54	3.10882	0.00561032	0.257029
GO:0055002	striated muscle cell development	biological_process	5	18	28	27.7778	64.2857	3.1058	0.0113264	0.40215
GO:0046058	cAMP metabolic process	biological_process	5	18	30	27.7778	60	3.1058	0.0113264	0.40215
GO:0008038	neuron recognition	biological_process	5	18	21	27.7778	85.7143	3.1058	0.0113264	0.40215
GO:0070679	inositol 1,4,5 trisphosphate binding	molecular_function	2	4	8	50	50	3.10426	0.0341517	0.733658
GO:0070571	negative regulation of neuron projection regeneration	biological_process	2	4	6	50	66.6667	3.10426	0.0341517	0.733658
GO:0070032	synaptobrevin 2-SNAP-25-syntaxin-1a-complexin I complex	cellular_component	2	4	4	50	100	3.10426	0.0341517	0.733658
GO:0055098	response to low-density lipoprotein particle stimulus	biological_process	2	4	5	50	80	3.10426	0.0341517	0.733658
GO:0048857	neural nucleus development	biological_process	2	4	12	50	33.3333	3.10426	0.0341517	0.733658
GO:0048846	axon extension involved in axon guidance	biological_process	2	4	8	50	50	3.10426	0.0341517	0.733658
GO:0048495	Roundabout binding	molecular_function	2	4	4	50	100	3.10426	0.0341517	0.733658
GO:0048406	nerve growth factor binding	molecular_function	2	4	6	50	66.6667	3.10426	0.0341517	0.733658
GO:0048155	S100 alpha binding	molecular_function	2	4	5	50	80	3.10426	0.0341517	0.733658
GO:0046475	glycerophospholipid catabolic process	biological_process	2	4	5	50	80	3.10426	0.0341517	0.733658
GO:0045730	respiratory burst	biological_process	2	4	11	50	36.3636	3.10426	0.0341517	0.733658
GO:0043353	enucleate erythrocyte differentiation	biological_process	2	4	6	50	66.6667	3.10426	0.0341517	0.733658
GO:0042754	negative regulation of circadian rhythm	biological_process	2	4	5	50	80	3.10426	0.0341517	0.733658
GO:0042321	negative regulation of circadian sleep/wake cycle, sleep	biological_process	2	4	5	50	80	3.10426	0.0341517	0.733658
GO:0038007	netrin-activated signaling pathway	biological_process	2	4	4	50	100	3.10426	0.0341517	0.733658
GO:0035729	cellular response to hepatocyte growth factor stimulus	biological_process	2	4	5	50	80	3.10426	0.0341517	0.733658
GO:0035728	response to hepatocyte growth factor stimulus	biological_process	2	4	5	50	80	3.10426	0.0341517	0.733658
GO:0035242	protein-arginine omega-N asymmetric methyltransferase activity	molecular_function	2	4	5	50	80	3.10426	0.0341517	0.733658
GO:0034969	histone arginine methylation	biological_process	2	4	6	50	66.6667	3.10426	0.0341517	0.733658
GO:0034111	negative regulation of homotypic cell-cell adhesion	biological_process	2	4	7	50	57.1429	3.10426	0.0341517	0.733658
GO:0033153	T cell receptor V(D)J recombination	biological_process	2	4	5	50	80	3.10426	0.0341517	0.733658
GO:0033033	negative regulation of myeloid cell apoptosis	biological_process	2	4	9	50	44.4444	3.10426	0.0341517	0.733658
GO:0032558	adenyl deoxyribonucleotide binding	molecular_function	2	4	5	50	80	3.10426	0.0341517	0.733658
GO:0032554	purine deoxyribonucleotide binding	molecular_function	2	4	5	50	80	3.10426	0.0341517	0.733658
GO:0032536	regulation of cell projection size	biological_process	2	4	6	50	66.6667	3.10426	0.0341517	0.733658
GO:0032317	regulation of Rap GTPase activity	biological_process	2	4	6	50	66.6667	3.10426	0.0341517	0.733658
GO:0031681	G-protein beta-subunit binding	molecular_function	2	4	6	50	66.6667	3.10426	0.0341517	0.733658
GO:0031362	anchored to external side of plasma membrane	cellular_component	2	4	10	50	40	3.10426	0.0341517	0.733658
GO:0030548	acetylcholine receptor regulator activity	molecular_function	2	4	5	50	80	3.10426	0.0341517	0.733658
GO:0030235	nitric-oxide synthase regulator activity	molecular_function	2	4	5	50	80	3.10426	0.0341517	0.733658
GO:0019919	peptidyl-arginine methylation, to asymmetrical-dimethyl arginine	biological_process	2	4	5	50	80	3.10426	0.0341517	0.733658
GO:0019103	pyrimidine nucleotide binding	molecular_function	2	4	11	50	36.3636	3.10426	0.0341517	0.733658
GO:0016840	carbon-nitrogen lyase activity	molecular_function	2	4	10	50	40	3.10426	0.0341517	0.733658
GO:0015277	kainate selective glutamate receptor activity	molecular_function	2	4	4	50	100	3.10426	0.0341517	0.733658
GO:0015012	heparan sulfate proteoglycan biosynthetic process	biological_process	2	4	6	50	66.6667	3.10426	0.0341517	0.733658
GO:0009138	pyrimidine nucleoside diphosphate metabolic process	biological_process	2	4	5	50	80	3.10426	0.0341517	0.733658
GO:0008499	UDP-galactose	molecular_function	2	4	5	50	80	3.10426	0.0341517	0.733658
GO:0008469	histone-arginine N-methyltransferase activity	molecular_function	2	4	6	50	66.6667	3.10426	0.0341517	0.733658
GO:0007220	Notch receptor processing	biological_process	2	4	5	50	80	3.10426	0.0341517	0.733658
GO:0005606	laminin-1 complex	cellular_component	2	4	7	50	57.1429	3.10426	0.0341517	0.733658
GO:0005042	netrin receptor activity	molecular_function	2	4	4	50	100	3.10426	0.0341517	0.733658
GO:0005005	transmembrane-ephrin receptor activity	molecular_function	2	4	6	50	66.6667	3.10426	0.0341517	0.733658
GO:0004396	hexokinase activity	molecular_function	2	4	6	50	66.6667	3.10426	0.0341517	0.733658
GO:0002903	negative regulation of B cell apoptosis	biological_process	2	4	8	50	50	3.10426	0.0341517	0.733658
GO:0002681	somatic recombination of T cell receptor gene segments	biological_process	2	4	5	50	80	3.10426	0.0341517	0.733658
GO:0002568	somatic diversification of T cell receptor genes	biological_process	2	4	5	50	80	3.10426	0.0341517	0.733658
GO:0002329	pre-B cell differentiation	biological_process	2	4	6	50	66.6667	3.10426	0.0341517	0.733658
GO:0002327	immature B cell differentiation	biological_process	2	4	6	50	66.6667	3.10426	0.0341517	0.733658
GO:0001661	conditioned taste aversion	biological_process	2	4	5	50	80	3.10426	0.0341517	0.733658
GO:0001106	RNA polymerase II transcription corepressor activity	molecular_function	2	4	11	50	36.3636	3.10426	0.0341517	0.733658
GO:0070570	regulation of neuron projection regeneration	biological_process	3	8	13	37.5	61.5385	3.08512	0.0208342	0.56617
GO:0060979	vasculogenesis involved in coronary vascular morphogenesis	biological_process	3	8	14	37.5	57.1429	3.08512	0.0208342	0.56617
GO:0060134	prepulse inhibition	biological_process	3	8	12	37.5	66.6667	3.08512	0.0208342	0.56617
GO:0060052	neurofilament cytoskeleton organization	biological_process	3	8	9	37.5	88.8889	3.08512	0.0208342	0.56617
GO:0048741	skeletal muscle fiber development	biological_process	3	8	13	37.5	61.5385	3.08512	0.0208342	0.56617
GO:0048699	generation of neurons	biological_process	3	8	13	37.5	61.5385	3.08512	0.0208342	0.56617
GO:0048679	regulation of axon regeneration	biological_process	3	8	13	37.5	61.5385	3.08512	0.0208342	0.56617
GO:0042659	regulation of cell fate specification	biological_process	3	8	18	37.5	44.4444	3.08512	0.0208342	0.56617
GO:0033151	V(D)J recombination	biological_process	3	8	12	37.5	66.6667	3.08512	0.0208342	0.56617
GO:0030166	proteoglycan biosynthetic process	biological_process	3	8	13	37.5	61.5385	3.08512	0.0208342	0.56617
GO:0015924	mannosyl-oligosaccharide mannosidase activity	molecular_function	3	8	10	37.5	80	3.08512	0.0208342	0.56617
GO:0005159	insulin-like growth factor receptor binding	molecular_function	3	8	14	37.5	57.1429	3.08512	0.0208342	0.56617
GO:0004016	adenylate cyclase activity	molecular_function	3	8	11	37.5	72.7273	3.08512	0.0208342	0.56617
GO:0051350	negative regulation of lyase activity	biological_process	6	24	37	25	64.8649	3.08437	0.00973117	0.356401
GO:0010977	negative regulation of neuron projection development	biological_process	6	24	31	25	77.4194	3.08437	0.00973117	0.356401
GO:0004714	transmembrane receptor protein tyrosine kinase activity	molecular_function	8	37	68	21.6216	54.4118	3.07215	0.00758493	0.306805
GO:0033121	regulation of purine nucleotide catabolic process	biological_process	23	159	262	14.4654	60.687	3.05086	0.00458137	0.220978
GO:0030811	regulation of nucleotide catabolic process	biological_process	23	159	262	14.4654	60.687	3.05086	0.00458137	0.220978
GO:0046847	filopodium assembly	biological_process	4	13	22	30.7692	59.0909	3.03721	0.0159843	0.518557
GO:0030035	microspike assembly	biological_process	4	13	24	30.7692	54.1667	3.03721	0.0159843	0.518557
GO:0016331	morphogenesis of embryonic epithelium	biological_process	4	13	31	30.7692	41.9355	3.03721	0.0159843	0.518557
GO:0051146	striated muscle cell differentiation	biological_process	7	31	52	22.5806	59.6154	3.0086	0.00960933	0.353967
GO:0009986	cell surface	cellular_component	27	197	364	13.7056	54.1209	3.00509	0.00488455	0.229803
GO:0030217	T cell differentiation	biological_process	9	45	88	20	51.1364	2.98691	0.00807662	0.317647
GO:0019199	transmembrane receptor protein kinase activity	molecular_function	9	45	85	20	52.9412	2.98691	0.00807662	0.317647
GO:0051899	membrane depolarization	biological_process	8	38	56	21.0526	67.8571	2.98379	0.00895397	0.335614
GO:0050839	cell adhesion molecule binding	molecular_function	8	38	58	21.0526	65.5172	2.98379	0.00895397	0.335614
GO:0002009	morphogenesis of an epithelium	biological_process	19	126	232	15.0794	54.3103	2.96707	0.00692679	0.284689
GO:0048489	synaptic vesicle transport	biological_process	6	25	33	24	75.7576	2.96328	0.0119613	0.41546
GO:0048013	ephrin receptor signaling pathway	biological_process	6	25	30	24	83.3333	2.96328	0.0119613	0.41546
GO:0032589	neuron projection membrane	cellular_component	6	25	35	24	71.4286	2.96328	0.0119613	0.41546
GO:0007186	G-protein coupled receptor protein signaling pathway	biological_process	40	324	2145	12.3457	15.1049	2.96146	0.00469414	0.225566
GO:0042221	response to chemical stimulus	biological_process	120	1183	2313	10.1437	51.1457	2.96097	0.00393973	0.199832
GO:0007187	G-protein signaling, coupled to cyclic nucleotide second messenger	biological_process	10	53	102	18.8679	51.9608	2.93782	0.00819154	0.320398
GO:0065008	regulation of biological quality	biological_process	94	896	1659	10.4911	54.0084	2.93548	0.00422091	0.209929
GO:0015672	monovalent inorganic cation transport	biological_process	25	181	339	13.8122	53.3923	2.93134	0.00761473	0.307039
GO:0046649	lymphocyte activation	biological_process	17	110	234	15.4545	47.0085	2.91597	0.00708603	0.288451
GO:0019935	cyclic-nucleotide-mediated signaling	biological_process	11	61	118	18.0328	51.6949	2.91151	0.00805448	0.317647
GO:0031301	integral to organelle membrane	cellular_component	14	85	138	16.4706	61.5942	2.90719	0.00773378	0.310859
GO:0010646	regulation of cell communication	biological_process	77	713	1218	10.7994	58.5386	2.90639	0.00489019	0.229803
GO:0030098	lymphocyte differentiation	biological_process	12	69	134	17.3913	51.4925	2.90044	0.0109264	0.392307
GO:0030100	regulation of endocytosis	biological_process	13	77	123	16.8831	62.6016	2.89999	0.00897982	0.335614
GO:0060589	nucleoside-triphosphatase regulator activity	molecular_function	34	268	447	12.6866	59.9553	2.89394	0.00585866	0.265059
GO:0009966	regulation of signal transduction	biological_process	81	759	1329	10.6719	57.1106	2.8715	0.00616101	0.266193
GO:0019932	second-messenger-mediated signaling	biological_process	16	103	202	15.534	50.9901	2.8505	0.00902916	0.336474
GO:0031102	neuron projection regeneration	biological_process	4	14	24	28.5714	58.3333	2.84818	0.0209955	0.56617
GO:0022408	negative regulation of cell-cell adhesion	biological_process	4	14	26	28.5714	53.8462	2.84818	0.0209955	0.56617
GO:0008088	axon cargo transport	biological_process	4	14	16	28.5714	87.5	2.84818	0.0209955	0.56617
GO:0002062	chondrocyte differentiation	biological_process	4	14	33	28.5714	42.4242	2.84818	0.0209955	0.56617
GO:0048678	response to axon injury	biological_process	6	26	44	23.0769	59.0909	2.8481	0.014528	0.48108
GO:0006839	mitochondrial transport	biological_process	6	26	46	23.0769	56.5217	2.8481	0.014528	0.48108
GO:0001649	osteoblast differentiation	biological_process	6	26	52	23.0769	50	2.8481	0.014528	0.48108
GO:0031345	negative regulation of cell projection organization	biological_process	9	47	63	19.1489	74.6032	2.83692	0.0107719	0.387851
GO:0006836	neurotransmitter transport	biological_process	9	47	81	19.1489	58.0247	2.83692	0.0107719	0.387851
GO:0005515	protein binding	molecular_function	380	4311	8086	8.81466	53.3144	2.83278	0.00505506	0.235817
GO:0030695	GTPase regulator activity	molecular_function	33	261	435	12.6437	60	2.8288	0.00733524	0.297648
GO:0031227	intrinsic to endoplasmic reticulum membrane	cellular_component	8	40	80	20	50	2.8153	0.0122336	0.421484
GO:0030971	receptor tyrosine kinase binding	molecular_function	5	20	31	25	64.5161	2.815	0.0179517	0.521243
GO:0007416	synapse assembly	biological_process	5	20	27	25	74.0741	2.815	0.0179517	0.521243
GO:0007044	cell-substrate junction assembly	biological_process	5	20	28	25	71.4286	2.815	0.0179517	0.521243
GO:0001159	core promoter proximal region DNA binding	molecular_function	5	20	35	25	57.1429	2.815	0.0179517	0.521243
GO:2000311	regulation of alpha-amino-3-hydroxy-5-methyl-4-isoxazole propionate selective glutamate receptor activity	biological_process	3	9	14	33.3333	64.2857	2.8107	0.02943	0.724806
GO:0060292	long term synaptic depression	biological_process	3	9	11	33.3333	81.8182	2.8107	0.02943	0.724806
GO:0030224	monocyte differentiation	biological_process	3	9	12	33.3333	75	2.8107	0.02943	0.724806
GO:0003179	heart valve morphogenesis	biological_process	3	9	19	33.3333	47.3684	2.8107	0.02943	0.724806
GO:0032102	negative regulation of response to external stimulus	biological_process	10	55	97	18.1818	56.701	2.80462	0.0106438	0.385408
GO:0006865	amino acid transport	biological_process	10	55	102	18.1818	53.9216	2.80462	0.0106438	0.385408
GO:0031099	regeneration	biological_process	11	63	118	17.4603	53.3898	2.79084	0.0155044	0.506902
GO:0050730	regulation of peptidyl-tyrosine phosphorylation	biological_process	12	71	127	16.9014	55.9055	2.78949	0.0124191	0.426722
GO:0004930	G-protein coupled receptor activity	molecular_function	26	196	1923	13.2653	10.1924	2.7672	0.0104344	0.379979
GO:0002521	leukocyte differentiation	biological_process	16	105	196	15.2381	53.5714	2.76576	0.010226	0.373452
GO:0031346	positive regulation of cell projection organization	biological_process	14	88	147	15.9091	59.8639	2.76312	0.0149854	0.493669
GO:0001701	in utero embryonic development	biological_process	19	132	230	14.3939	57.3913	2.74501	0.013583	0.462981
GO:0019933	cAMP-mediated signaling	biological_process	10	56	106	17.8571	52.8302	2.74018	0.0120613	0.41667
GO:0045666	positive regulation of neuron differentiation	biological_process	8	41	72	19.5122	56.9444	2.73485	0.0141694	0.476615
GO:0008021	synaptic vesicle	cellular_component	11	64	93	17.1875	68.8172	2.73219	0.0163504	0.521243
GO:0019725	cellular homeostasis	biological_process	36	296	550	12.1622	53.8182	2.70753	0.0114857	0.406678
GO:0007188	G-protein signaling, coupled to cAMP nucleotide second messenger	biological_process	9	49	92	18.3673	53.2609	2.69442	0.0140911	0.476615
GO:0008637	apoptotic mitochondrial changes	biological_process	5	21	37	23.8095	56.7568	2.68302	0.0220566	0.587348
GO:0015837	amine transport	biological_process	12	73	144	16.4384	50.6944	2.68216	0.014359	0.480549
GO:0030324	lung development	biological_process	10	57	103	17.5439	55.3398	2.67709	0.0222707	0.591817
GO:0048521	negative regulation of behavior	biological_process	4	15	25	26.6667	60	2.67571	0.0268671	0.68003
GO:0045296	cadherin binding	molecular_function	4	15	23	26.6667	65.2174	2.67571	0.0268671	0.68003
GO:0043548	phosphatidylinositol 3-kinase binding	molecular_function	4	15	26	26.6667	57.6923	2.67571	0.0268671	0.68003
GO:0016849	phosphorus-oxygen lyase activity	molecular_function	4	15	24	26.6667	62.5	2.67571	0.0268671	0.68003
GO:0008375	acetylglucosaminyltransferase activity	molecular_function	4	15	36	26.6667	41.6667	2.67571	0.0268671	0.68003
GO:0006110	regulation of glycolysis	biological_process	4	15	21	26.6667	71.4286	2.67571	0.0268671	0.68003
GO:0005200	structural constituent of cytoskeleton	molecular_function	4	15	36	26.6667	41.6667	2.67571	0.0268671	0.68003
GO:0045321	leukocyte activation	biological_process	19	134	288	14.1791	46.5278	2.67353	0.0143616	0.480549
GO:0051056	regulation of small GTPase mediated signal transduction	biological_process	18	125	204	14.4	61.2745	2.67271	0.0120161	0.416231
GO:0005083	small GTPase regulator activity	molecular_function	23	171	283	13.4503	60.424	2.67122	0.0141636	0.476615
GO:0006796	phosphate metabolic process	biological_process	71	666	1206	10.6607	55.2239	2.66365	0.0112413	0.40215
GO:0048168	regulation of neuronal synaptic plasticity	biological_process	8	42	53	19.0476	79.2453	2.65673	0.0163189	0.521243
GO:0005230	extracellular ligand-gated ion channel activity	molecular_function	8	42	68	19.0476	61.7647	2.65673	0.0163189	0.521243
GO:0048519	negative regulation of biological process	biological_process	141	1454	2610	9.69739	55.7088	2.65484	0.0095132	0.351439
GO:0072111	cell proliferation involved in kidney development	biological_process	2	5	8	40	62.5	2.64505	0.0539447	0.863358
GO:0060693	regulation of branching involved in salivary gland morphogenesis	biological_process	2	5	10	40	50	2.64505	0.0539447	0.863358
GO:0060666	dichotomous subdivision of terminal units involved in salivary gland branching	biological_process	2	5	5	40	100	2.64505	0.0539447	0.863358
GO:0060334	regulation of interferon-gamma-mediated signaling pathway	biological_process	2	5	7	40	71.4286	2.64505	0.0539447	0.863358
GO:0060330	regulation of response to interferon-gamma	biological_process	2	5	8	40	62.5	2.64505	0.0539447	0.863358
GO:0055057	neuroblast division	biological_process	2	5	8	40	62.5	2.64505	0.0539447	0.863358
GO:0048843	negative regulation of axon extension involved in axon guidance	biological_process	2	5	9	40	55.5556	2.64505	0.0539447	0.863358
GO:0048531	beta-1,3-galactosyltransferase activity	molecular_function	2	5	6	40	83.3333	2.64505	0.0539447	0.863358
GO:0046325	negative regulation of glucose import	biological_process	2	5	9	40	55.5556	2.64505	0.0539447	0.863358
GO:0043518	negative regulation of DNA damage response, signal transduction by p53 class mediator	biological_process	2	5	10	40	50	2.64505	0.0539447	0.863358
GO:0043268	positive regulation of potassium ion transport	biological_process	2	5	8	40	62.5	2.64505	0.0539447	0.863358
GO:0043121	neurotrophin binding	molecular_function	2	5	8	40	62.5	2.64505	0.0539447	0.863358
GO:0042165	neurotransmitter binding	molecular_function	2	5	8	40	62.5	2.64505	0.0539447	0.863358
GO:0035767	endothelial cell chemotaxis	biological_process	2	5	8	40	62.5	2.64505	0.0539447	0.863358
GO:0035247	peptidyl-arginine omega-N-methylation	biological_process	2	5	7	40	71.4286	2.64505	0.0539447	0.863358
GO:0032584	growth cone membrane	cellular_component	2	5	6	40	83.3333	2.64505	0.0539447	0.863358
GO:0032552	deoxyribonucleotide binding	molecular_function	2	5	7	40	71.4286	2.64505	0.0539447	0.863358
GO:0021873	forebrain neuroblast division	biological_process	2	5	8	40	62.5	2.64505	0.0539447	0.863358
GO:0021517	ventral spinal cord development	biological_process	2	5	6	40	83.3333	2.64505	0.0539447	0.863358
GO:0014888	striated muscle adaptation	biological_process	2	5	10	40	50	2.64505	0.0539447	0.863358
GO:0010454	negative regulation of cell fate commitment	biological_process	2	5	11	40	45.4545	2.64505	0.0539447	0.863358
GO:0007406	negative regulation of neuroblast proliferation	biological_process	2	5	8	40	62.5	2.64505	0.0539447	0.863358
GO:0007196	inhibition of adenylate cyclase activity by metabotropic glutamate receptor signaling pathway	biological_process	2	5	7	40	71.4286	2.64505	0.0539447	0.863358
GO:0005452	inorganic anion exchanger activity	molecular_function	2	5	12	40	41.6667	2.64505	0.0539447	0.863358
GO:0005388	calcium-transporting ATPase activity	molecular_function	2	5	9	40	55.5556	2.64505	0.0539447	0.863358
GO:0005237	inhibitory extracellular ligand-gated ion channel activity	molecular_function	2	5	7	40	71.4286	2.64505	0.0539447	0.863358
GO:0005004	GPI-linked ephrin receptor activity	molecular_function	2	5	5	40	100	2.64505	0.0539447	0.863358
GO:0004972	N-methyl-D-aspartate selective glutamate receptor activity	molecular_function	2	5	6	40	83.3333	2.64505	0.0539447	0.863358
GO:0001640	adenylate cyclase inhibiting metabotropic glutamate receptor activity	molecular_function	2	5	7	40	71.4286	2.64505	0.0539447	0.863358
GO:0043009	chordate embryonic development	biological_process	19	135	234	14.0741	57.6923	2.63824	0.0148478	0.490399
GO:0007190	activation of adenylate cyclase activity	biological_process	6	28	53	21.4286	52.8302	2.63341	0.0207602	0.56617
GO:0045639	positive regulation of myeloid cell differentiation	biological_process	7	35	59	20	59.322	2.63274	0.0186335	0.530995
GO:0030594	neurotransmitter receptor activity	molecular_function	7	35	66	20	53.0303	2.63274	0.0186335	0.530995
GO:0010469	regulation of receptor activity	biological_process	7	35	56	20	62.5	2.63274	0.0186335	0.530995
GO:0003012	muscle system process	biological_process	12	74	131	16.2162	56.4885	2.62978	0.0155061	0.506902
GO:0050731	positive regulation of peptidyl-tyrosine phosphorylation	biological_process	10	58	99	17.2414	58.5859	2.61529	0.0232775	0.61095
GO:0001934	positive regulation of protein phosphorylation	biological_process	20	145	248	13.7931	58.4677	2.60982	0.0131779	0.450373
GO:0045937	positive regulation of phosphate metabolic process	biological_process	22	164	284	13.4146	57.7465	2.59792	0.0184902	0.530995
GO:0010562	positive regulation of phosphorus metabolic process	biological_process	22	164	284	13.4146	57.7465	2.59792	0.0184902	0.530995
GO:0032319	regulation of Rho GTPase activity	biological_process	8	43	92	18.6047	46.7391	2.58082	0.0186941	0.530995
GO:0007162	negative regulation of cell adhesion	biological_process	8	43	75	18.6047	57.3333	2.58082	0.0186941	0.530995
GO:0060271	cilium morphogenesis	biological_process	3	10	30	30	33.3333	2.5735	0.0396036	0.806072
GO:0048488	synaptic vesicle endocytosis	biological_process	3	10	11	30	90.9091	2.5735	0.0396036	0.806072
GO:0045843	negative regulation of striated muscle tissue development	biological_process	3	10	16	30	62.5	2.5735	0.0396036	0.806072
GO:0045109	intermediate filament organization	biological_process	3	10	17	30	58.8235	2.5735	0.0396036	0.806072
GO:0033032	regulation of myeloid cell apoptosis	biological_process	3	10	16	30	62.5	2.5735	0.0396036	0.806072
GO:0016339	calcium-dependent cell-cell adhesion	biological_process	3	10	14	30	71.4286	2.5735	0.0396036	0.806072
GO:0015923	mannosidase activity	molecular_function	3	10	15	30	66.6667	2.5735	0.0396036	0.806072
GO:0015085	calcium ion transmembrane transporter activity	molecular_function	3	10	16	30	62.5	2.5735	0.0396036	0.806072
GO:0009312	oligosaccharide biosynthetic process	biological_process	3	10	15	30	66.6667	2.5735	0.0396036	0.806072
GO:0006171	cAMP biosynthetic process	biological_process	3	10	16	30	62.5	2.5735	0.0396036	0.806072
GO:0005242	inward rectifier potassium channel activity	molecular_function	3	10	18	30	55.5556	2.5735	0.0396036	0.806072
GO:0005184	neuropeptide hormone activity	molecular_function	3	10	19	30	52.6316	2.5735	0.0396036	0.806072
GO:0005165	neurotrophin receptor binding	molecular_function	3	10	14	30	71.4286	2.5735	0.0396036	0.806072
GO:0002902	regulation of B cell apoptosis	biological_process	3	10	14	30	71.4286	2.5735	0.0396036	0.806072
GO:0000978	RNA polymerase II core promoter proximal region sequence-specific DNA binding	molecular_function	3	10	19	30	52.6316	2.5735	0.0396036	0.806072
GO:0008227	G-protein coupled amine receptor activity	molecular_function	5	22	53	22.7273	41.5094	2.55867	0.026725	0.68003
GO:0007167	enzyme linked receptor protein signaling pathway	biological_process	25	194	358	12.8866	54.1899	2.55585	0.0152633	0.50153
GO:0048729	tissue morphogenesis	biological_process	21	156	307	13.4615	50.8143	2.55444	0.0161259	0.521243
GO:0009895	negative regulation of catabolic process	biological_process	7	36	66	19.4444	54.5455	2.54692	0.0215913	0.57616
GO:0009792	embryo development ending in birth or egg hatching	biological_process	19	138	241	13.7681	57.2614	2.53412	0.0167066	0.521243
GO:0032587	ruffle membrane	cellular_component	6	29	44	20.6897	65.9091	2.53302	0.0244661	0.63562
GO:0005615	extracellular space	cellular_component	39	335	832	11.6418	40.2644	2.52847	0.0174145	0.521243
GO:0042578	phosphoric ester hydrolase activity	molecular_function	26	205	346	12.6829	59.2486	2.52004	0.0179065	0.521243
GO:0050848	regulation of calcium-mediated signaling	biological_process	4	16	30	25	53.3333	2.51726	0.0336239	0.733658
GO:0050766	positive regulation of phagocytosis	biological_process	4	16	33	25	48.4848	2.51726	0.0336239	0.733658
GO:0021955	central nervous system neuron axonogenesis	biological_process	4	16	22	25	72.7273	2.51726	0.0336239	0.733658
GO:0016444	somatic cell DNA recombination	biological_process	4	16	28	25	57.1429	2.51726	0.0336239	0.733658
GO:0003151	outflow tract morphogenesis	biological_process	4	16	32	25	50	2.51726	0.0336239	0.733658
GO:0002562	somatic diversification of immune receptors via germline recombination within a single locus	biological_process	4	16	28	25	57.1429	2.51726	0.0336239	0.733658
GO:0002200	somatic diversification of immune receptors	biological_process	4	16	30	25	53.3333	2.51726	0.0336239	0.733658
GO:0006470	protein dephosphorylation	biological_process	13	85	135	15.2941	62.963	2.50483	0.0234853	0.61263
GO:0050790	regulation of catalytic activity	biological_process	83	811	1442	10.2343	56.2413	2.49526	0.0144147	0.481067
GO:0048878	chemical homeostasis	biological_process	40	347	651	11.5274	53.3026	2.49489	0.0194262	0.54935
GO:0009123	nucleoside monophosphate metabolic process	biological_process	9	52	93	17.3077	55.914	2.4932	0.0335503	0.733658
GO:0008081	phosphoric diester hydrolase activity	molecular_function	9	52	85	17.3077	61.1765	2.4932	0.0335503	0.733658
GO:0009894	regulation of catabolic process	biological_process	35	296	483	11.8243	61.2836	2.48932	0.0162162	0.521243
GO:0032318	regulation of Ras GTPase activity	biological_process	15	103	180	14.5631	57.2222	2.48461	0.025277	0.652707
GO:0071705	nitrogen compound transport	biological_process	13	86	169	15.1163	50.8876	2.45848	0.024561	0.636793
GO:0030155	regulation of cell adhesion	biological_process	18	131	247	13.7405	53.0364	2.45627	0.0214117	0.573763
GO:0031401	positive regulation of protein modification process	biological_process	25	198	332	12.6263	59.6386	2.44589	0.0228221	0.603629
GO:0032101	regulation of response to external stimulus	biological_process	20	150	300	13.3333	50	2.44553	0.0213535	0.573404
GO:0046875	ephrin receptor binding	molecular_function	5	23	29	21.7391	79.3103	2.44113	0.0319781	0.733658
GO:0046651	lymphocyte proliferation	biological_process	5	23	52	21.7391	44.2308	2.44113	0.0319781	0.733658
GO:0033138	positive regulation of peptidyl-serine phosphorylation	biological_process	5	23	42	21.7391	54.7619	2.44113	0.0319781	0.733658
GO:0032943	mononuclear cell proliferation	biological_process	5	23	53	21.7391	43.3962	2.44113	0.0319781	0.733658
GO:0001657	ureteric bud development	biological_process	5	23	46	21.7391	50	2.44113	0.0319781	0.733658
GO:0048638	regulation of developmental growth	biological_process	10	61	104	16.3934	58.6538	2.43718	0.0275628	0.696261
GO:0045762	positive regulation of adenylate cyclase activity	biological_process	6	30	55	20	54.5455	2.43677	0.0285889	0.715115
GO:0030176	integral to endoplasmic reticulum membrane	cellular_component	6	30	53	20	56.6038	2.43677	0.0285889	0.715115
GO:0042327	positive regulation of phosphorylation	biological_process	21	160	276	13.125	57.971	2.42899	0.0254305	0.655348
GO:0016043	cellular component organization	biological_process	151	1597	2862	9.45523	55.8001	2.41515	0.0190279	0.539277
GO:0004713	protein tyrosine kinase activity	molecular_function	32	269	511	11.8959	52.6419	2.41342	0.021568	0.57616
GO:0006006	glucose metabolic process	biological_process	11	70	155	15.7143	45.1613	2.40149	0.0247002	0.639105
GO:0016773	phosphotransferase activity, alcohol group as acceptor	molecular_function	45	405	753	11.1111	53.7849	2.38792	0.0236553	0.615808
GO:0055085	transmembrane transport	biological_process	43	384	742	11.1979	51.752	2.38654	0.0206376	0.56617
GO:0034329	cell junction assembly	biological_process	7	38	61	18.4211	62.2951	2.38359	0.0284511	0.714463
GO:0001012	RNA polymerase II regulatory region DNA binding	molecular_function	7	38	68	18.4211	55.8824	2.38359	0.0284511	0.714463
GO:0031012	extracellular matrix	cellular_component	20	152	338	13.1579	44.9704	2.38152	0.0229041	0.603629
GO:0044431	Golgi apparatus part	cellular_component	37	322	539	11.4907	59.7403	2.37512	0.0210663	0.566884
GO:0071295	cellular response to vitamin	biological_process	4	17	40	23.5294	42.5	2.37079	0.0412797	0.824432
GO:0043266	regulation of potassium ion transport	biological_process	4	17	24	23.5294	70.8333	2.37079	0.0412797	0.824432
GO:0034704	calcium channel complex	cellular_component	4	17	24	23.5294	70.8333	2.37079	0.0412797	0.824432
GO:0030545	receptor regulator activity	molecular_function	4	17	29	23.5294	58.6207	2.37079	0.0412797	0.824432
GO:0019400	alditol metabolic process	biological_process	4	17	31	23.5294	54.8387	2.37079	0.0412797	0.824432
GO:0009190	cyclic nucleotide biosynthetic process	biological_process	4	17	34	23.5294	50	2.37079	0.0412797	0.824432
GO:0007613	memory	biological_process	9	54	72	16.6667	75	2.36654	0.0367357	0.776126
GO:0005088	Ras guanyl-nucleotide exchange factor activity	molecular_function	9	54	91	16.6667	59.3407	2.36654	0.0367357	0.776126
GO:0048635	negative regulation of muscle organ development	biological_process	3	11	18	27.2727	61.1111	2.36509	0.0513102	0.863358
GO:0046965	retinoid X receptor binding	molecular_function	3	11	14	27.2727	78.5714	2.36509	0.0513102	0.863358
GO:0034504	protein localization to nucleus	biological_process	3	11	22	27.2727	50	2.36509	0.0513102	0.863358
GO:0032963	collagen metabolic process	biological_process	3	11	30	27.2727	36.6667	2.36509	0.0513102	0.863358
GO:0032012	regulation of ARF protein signal transduction	biological_process	3	11	16	27.2727	68.75	2.36509	0.0513102	0.863358
GO:0030517	negative regulation of axon extension	biological_process	3	11	16	27.2727	68.75	2.36509	0.0513102	0.863358
GO:0030199	collagen fibril organization	biological_process	3	11	28	27.2727	39.2857	2.36509	0.0513102	0.863358
GO:0021952	central nervous system projection neuron axonogenesis	biological_process	3	11	15	27.2727	73.3333	2.36509	0.0513102	0.863358
GO:0016486	peptide hormone processing	biological_process	3	11	14	27.2727	78.5714	2.36509	0.0513102	0.863358
GO:0010453	regulation of cell fate commitment	biological_process	3	11	23	27.2727	47.8261	2.36509	0.0513102	0.863358
GO:0005086	ARF guanyl-nucleotide exchange factor activity	molecular_function	3	11	17	27.2727	64.7059	2.36509	0.0513102	0.863358
GO:0002090	regulation of receptor internalization	biological_process	3	11	15	27.2727	73.3333	2.36509	0.0513102	0.863358
GO:0040008	regulation of growth	biological_process	32	272	464	11.7647	58.6207	2.34613	0.0228815	0.603629
GO:0031281	positive regulation of cyclase activity	biological_process	6	31	57	19.3548	54.386	2.34433	0.033144	0.733658
GO:0022407	regulation of cell-cell adhesion	biological_process	6	31	62	19.3548	50	2.34433	0.033144	0.733658
GO:0048585	negative regulation of response to stimulus	biological_process	38	334	565	11.3772	59.115	2.34265	0.023264	0.61095
GO:0070661	leukocyte proliferation	biological_process	5	24	54	20.8333	44.4444	2.32971	0.0378326	0.795355
GO:0030017	sarcomere	cellular_component	5	24	42	20.8333	57.1429	2.32971	0.0378326	0.795355
GO:0014069	postsynaptic density	cellular_component	13	89	129	14.6067	68.9922	2.32305	0.0286663	0.71565
GO:0016301	kinase activity	molecular_function	51	473	876	10.7822	53.9954	2.31957	0.0233264	0.61098
GO:0001505	regulation of neurotransmitter levels	biological_process	7	39	61	17.9487	63.9344	2.30574	0.032378	0.733658
GO:2000095	regulation of Wnt receptor signaling pathway, planar cell polarity pathway	biological_process	2	6	7	33.3333	85.7143	2.29454	0.0767185	0.863358
GO:2000050	regulation of non-canonical Wnt receptor signaling pathway	biological_process	2	6	7	33.3333	85.7143	2.29454	0.0767185	0.863358
GO:0071398	cellular response to fatty acid	biological_process	2	6	10	33.3333	60	2.29454	0.0767185	0.863358
GO:0060638	mesenchymal-epithelial cell signaling	biological_process	2	6	10	33.3333	60	2.29454	0.0767185	0.863358
GO:0051972	regulation of telomerase activity	biological_process	2	6	9	33.3333	66.6667	2.29454	0.0767185	0.863358
GO:0048745	smooth muscle tissue development	biological_process	2	6	16	33.3333	37.5	2.29454	0.0767185	0.863358
GO:0048170	positive regulation of long-term neuronal synaptic plasticity	biological_process	2	6	7	33.3333	85.7143	2.29454	0.0767185	0.863358
GO:0047372	acylglycerol lipase activity	molecular_function	2	6	8	33.3333	75	2.29454	0.0767185	0.863358
GO:0045988	negative regulation of striated muscle contraction	biological_process	2	6	8	33.3333	75	2.29454	0.0767185	0.863358
GO:0045821	positive regulation of glycolysis	biological_process	2	6	9	33.3333	66.6667	2.29454	0.0767185	0.863358
GO:0045197	establishment or maintenance of epithelial cell apical/basal polarity	biological_process	2	6	10	33.3333	60	2.29454	0.0767185	0.863358
GO:0043256	laminin complex	cellular_component	2	6	10	33.3333	60	2.29454	0.0767185	0.863358
GO:0035246	peptidyl-arginine N-methylation	biological_process	2	6	8	33.3333	75	2.29454	0.0767185	0.863358
GO:0035014	phosphatidylinositol 3-kinase regulator activity	molecular_function	2	6	7	33.3333	85.7143	2.29454	0.0767185	0.863358
GO:0031497	chromatin assembly	biological_process	2	6	16	33.3333	37.5	2.29454	0.0767185	0.863358
GO:0031434	mitogen-activated protein kinase kinase binding	molecular_function	2	6	12	33.3333	50	2.29454	0.0767185	0.863358
GO:0031233	intrinsic to external side of plasma membrane	cellular_component	2	6	14	33.3333	42.8571	2.29454	0.0767185	0.863358
GO:0030574	collagen catabolic process	biological_process	2	6	17	33.3333	35.2941	2.29454	0.0767185	0.863358
GO:0030547	receptor inhibitor activity	molecular_function	2	6	10	33.3333	60	2.29454	0.0767185	0.863358
GO:0030432	peristalsis	biological_process	2	6	9	33.3333	66.6667	2.29454	0.0767185	0.863358
GO:0030201	heparan sulfate proteoglycan metabolic process	biological_process	2	6	10	33.3333	60	2.29454	0.0767185	0.863358
GO:0018216	peptidyl-arginine methylation	biological_process	2	6	8	33.3333	75	2.29454	0.0767185	0.863358
GO:0017146	N-methyl-D-aspartate selective glutamate receptor complex	cellular_component	2	6	10	33.3333	60	2.29454	0.0767185	0.863358
GO:0016868	intramolecular transferase activity, phosphotransferases	molecular_function	2	6	11	33.3333	54.5455	2.29454	0.0767185	0.863358
GO:0016812	hydrolase activity, acting on carbon-nitrogen (but not peptide) bonds, in cyclic amides	molecular_function	2	6	10	33.3333	60	2.29454	0.0767185	0.863358
GO:0016671	oxidoreductase activity, acting on a sulfur group of donors, disulfide as acceptor	molecular_function	2	6	10	33.3333	60	2.29454	0.0767185	0.863358
GO:0016558	protein import into peroxisome matrix	biological_process	2	6	9	33.3333	66.6667	2.29454	0.0767185	0.863358
GO:0016274	protein-arginine N-methyltransferase activity	molecular_function	2	6	8	33.3333	75	2.29454	0.0767185	0.863358
GO:0016273	arginine N-methyltransferase activity	molecular_function	2	6	8	33.3333	75	2.29454	0.0767185	0.863358
GO:0015172	acidic amino acid transmembrane transporter activity	molecular_function	2	6	11	33.3333	54.5455	2.29454	0.0767185	0.863358
GO:0014812	muscle cell migration	biological_process	2	6	9	33.3333	66.6667	2.29454	0.0767185	0.863358
GO:0010985	negative regulation of lipoprotein particle clearance	biological_process	2	6	8	33.3333	75	2.29454	0.0767185	0.863358
GO:0010837	regulation of keratinocyte proliferation	biological_process	2	6	10	33.3333	60	2.29454	0.0767185	0.863358
GO:0010829	negative regulation of glucose transport	biological_process	2	6	11	33.3333	54.5455	2.29454	0.0767185	0.863358
GO:0010171	body morphogenesis	biological_process	2	6	9	33.3333	66.6667	2.29454	0.0767185	0.863358
GO:0008294	calcium- and calmodulin-responsive adenylate cyclase activity	molecular_function	2	6	6	33.3333	100	2.29454	0.0767185	0.863358
GO:0007191	activation of adenylate cyclase activity by dopamine receptor signaling pathway	biological_process	2	6	10	33.3333	60	2.29454	0.0767185	0.863358
GO:0005313	L-glutamate transmembrane transporter activity	molecular_function	2	6	10	33.3333	60	2.29454	0.0767185	0.863358
GO:0005167	neurotrophin TRK receptor binding	molecular_function	2	6	7	33.3333	85.7143	2.29454	0.0767185	0.863358
GO:0005112	Notch binding	molecular_function	2	6	10	33.3333	60	2.29454	0.0767185	0.863358
GO:0004571	mannosyl-oligosaccharide 1,2-alpha-mannosidase activity	molecular_function	2	6	8	33.3333	75	2.29454	0.0767185	0.863358
GO:0004559	alpha-mannosidase activity	molecular_function	2	6	8	33.3333	75	2.29454	0.0767185	0.863358
GO:0001504	neurotransmitter uptake	biological_process	2	6	11	33.3333	54.5455	2.29454	0.0767185	0.863358
GO:0005102	receptor binding	molecular_function	60	573	1132	10.4712	50.6184	2.28403	0.0255312	0.65662
GO:0051129	negative regulation of cellular component organization	biological_process	21	165	269	12.7273	61.3383	2.27697	0.0289083	0.718882
GO:0017038	protein import	biological_process	10	64	107	15.625	59.8131	2.26903	0.0338149	0.733658
GO:0003779	actin binding	molecular_function	23	185	319	12.4324	57.9937	2.26414	0.0281855	0.710587
GO:0005911	cell-cell junction	cellular_component	20	156	277	12.8205	56.3177	2.25625	0.0349313	0.749147
GO:0051349	positive regulation of lyase activity	biological_process	6	32	59	18.75	54.2373	2.25543	0.0381444	0.799281
GO:0045767	regulation of anti-apoptosis	biological_process	6	32	56	18.75	57.1429	2.25543	0.0381444	0.799281
GO:0010038	response to metal ion	biological_process	18	137	253	13.1387	54.1502	2.25068	0.0365057	0.776126
GO:0051241	negative regulation of multicellular organismal process	biological_process	21	166	291	12.6506	57.0447	2.24717	0.0298527	0.733658
GO:0034330	cell junction organization	biological_process	9	56	85	16.0714	65.8824	2.24526	0.0411093	0.824432
GO:0051931	regulation of sensory perception	biological_process	4	18	31	22.2222	58.0645	2.2347	0.0498377	0.863358
GO:0051930	regulation of sensory perception of pain	biological_process	4	18	31	22.2222	58.0645	2.2347	0.0498377	0.863358
GO:0051145	smooth muscle cell differentiation	biological_process	4	18	30	22.2222	60	2.2347	0.0498377	0.863358
GO:0035249	synaptic transmission, glutamatergic	biological_process	4	18	26	22.2222	69.2308	2.2347	0.0498377	0.863358
GO:0030331	estrogen receptor binding	molecular_function	4	18	26	22.2222	69.2308	2.2347	0.0498377	0.863358
GO:0008045	motor axon guidance	biological_process	4	18	23	22.2222	78.2609	2.2347	0.0498377	0.863358
GO:0007269	neurotransmitter secretion	biological_process	4	18	26	22.2222	69.2308	2.2347	0.0498377	0.863358
GO:0030246	carbohydrate binding	molecular_function	25	206	430	12.1359	47.907	2.23309	0.0358811	0.768229
GO:0045944	positive regulation of transcription from RNA polymerase II promoter	biological_process	42	382	665	10.9948	57.4436	2.23024	0.0330152	0.733658
GO:0050773	regulation of dendrite development	biological_process	7	40	60	17.5	66.6667	2.23023	0.0366511	0.776126
GO:0048259	regulation of receptor-mediated endocytosis	biological_process	5	25	39	20	64.1026	2.22383	0.0443004	0.863358
GO:0050954	sensory perception of mechanical stimulus	biological_process	10	65	111	15.3846	58.5586	2.215	0.0363521	0.77442
GO:0003714	transcription corepressor activity	molecular_function	10	65	110	15.3846	59.0909	2.215	0.0363521	0.77442
GO:0048523	negative regulation of cellular process	biological_process	127	1341	2386	9.47054	56.2028	2.19837	0.0329061	0.733658
GO:2000297	negative regulation of synapse maturation	biological_process	1	2	2	50	100	2.1948	0.153061	1
GO:2000195	negative regulation of female gonad development	biological_process	1	2	3	50	66.6667	2.1948	0.153061	1
GO:2000194	regulation of female gonad development	biological_process	1	2	5	50	40	2.1948	0.153061	1
GO:2000124	regulation of endocannabinoid signaling pathway	biological_process	1	2	2	50	100	2.1948	0.153061	1
GO:2000097	regulation of smooth muscle cell-matrix adhesion	biological_process	1	2	2	50	100	2.1948	0.153061	1
GO:2000096	positive regulation of Wnt receptor signaling pathway, planar cell polarity pathway	biological_process	1	2	3	50	66.6667	2.1948	0.153061	1
GO:2000044	negative regulation of cardiac cell fate specification	biological_process	1	2	3	50	66.6667	2.1948	0.153061	1
GO:2000043	regulation of cardiac cell fate specification	biological_process	1	2	4	50	50	2.1948	0.153061	1
GO:2000020	positive regulation of male gonad development	biological_process	1	2	5	50	40	2.1948	0.153061	1
GO:2000018	regulation of male gonad development	biological_process	1	2	6	50	33.3333	2.1948	0.153061	1
GO:0090381	regulation of heart induction	biological_process	1	2	5	50	40	2.1948	0.153061	1
GO:0090331	negative regulation of platelet aggregation	biological_process	1	2	3	50	66.6667	2.1948	0.153061	1
GO:0090292	nuclear matrix anchoring at nuclear membrane	biological_process	1	2	3	50	66.6667	2.1948	0.153061	1
GO:0090286	cytoskeletal anchoring at nuclear membrane	biological_process	1	2	5	50	40	2.1948	0.153061	1
GO:0090141	positive regulation of mitochondrial fission	biological_process	1	2	2	50	100	2.1948	0.153061	1
GO:0090084	negative regulation of inclusion body assembly	biological_process	1	2	3	50	66.6667	2.1948	0.153061	1
GO:0090080	positive regulation of MAPKKK cascade by fibroblast growth factor receptor signaling pathway	biological_process	1	2	7	50	28.5714	2.1948	0.153061	1
GO:0072498	embryonic skeletal joint development	biological_process	1	2	4	50	50	2.1948	0.153061	1
GO:0072361	regulation of glycolysis by regulation of transcription from an RNA polymerase II promoter	biological_process	1	2	2	50	100	2.1948	0.153061	1
GO:0072358	cardiovascular system development	biological_process	1	2	3	50	66.6667	2.1948	0.153061	1
GO:0072301	regulation of metanephric glomerular mesangial cell proliferation	biological_process	1	2	2	50	100	2.1948	0.153061	1
GO:0072110	glomerular mesangial cell proliferation	biological_process	1	2	3	50	66.6667	2.1948	0.153061	1
GO:0072095	regulation of branch elongation involved in ureteric bud branching	biological_process	1	2	4	50	50	2.1948	0.153061	1
GO:0072088	nephron epithelium morphogenesis	biological_process	1	2	7	50	28.5714	2.1948	0.153061	1
GO:0072078	nephron tubule morphogenesis	biological_process	1	2	7	50	28.5714	2.1948	0.153061	1
GO:0072075	metanephric mesenchyme development	biological_process	1	2	5	50	40	2.1948	0.153061	1
GO:0072074	kidney mesenchyme development	biological_process	1	2	6	50	33.3333	2.1948	0.153061	1
GO:0071930	negative regulation of transcription involved in G1/S phase of mitotic cell cycle	biological_process	1	2	2	50	100	2.1948	0.153061	1
GO:0071899	negative regulation of estrogen receptor binding	biological_process	1	2	2	50	100	2.1948	0.153061	1
GO:0071898	regulation of estrogen receptor binding	biological_process	1	2	2	50	100	2.1948	0.153061	1
GO:0071780	mitotic cell cycle G2/M transition checkpoint	biological_process	1	2	10	50	20	2.1948	0.153061	1
GO:0071506	cellular response to mycophenolic acid	biological_process	1	2	2	50	100	2.1948	0.153061	1
GO:0071505	response to mycophenolic acid	biological_process	1	2	2	50	100	2.1948	0.153061	1
GO:0071481	cellular response to X-ray	biological_process	1	2	5	50	40	2.1948	0.153061	1
GO:0071480	cellular response to gamma radiation	biological_process	1	2	7	50	28.5714	2.1948	0.153061	1
GO:0071421	manganese ion transmembrane transport	biological_process	1	2	6	50	33.3333	2.1948	0.153061	1
GO:0070884	regulation of calcineurin-NFAT signaling pathway	biological_process	1	2	3	50	66.6667	2.1948	0.153061	1
GO:0070845	polyubiquitinated misfolded protein transport	biological_process	1	2	2	50	100	2.1948	0.153061	1
GO:0070844	polyubiquitinated protein transport	biological_process	1	2	2	50	100	2.1948	0.153061	1
GO:0070843	misfolded protein transport	biological_process	1	2	2	50	100	2.1948	0.153061	1
GO:0070402	NADPH binding	molecular_function	1	2	7	50	28.5714	2.1948	0.153061	1
GO:0070324	thyroid hormone binding	molecular_function	1	2	4	50	50	2.1948	0.153061	1
GO:0070318	positive regulation of G0 to G1 transition	biological_process	1	2	3	50	66.6667	2.1948	0.153061	1
GO:0070316	regulation of G0 to G1 transition	biological_process	1	2	4	50	50	2.1948	0.153061	1
GO:0070097	delta-catenin binding	molecular_function	1	2	4	50	50	2.1948	0.153061	1
GO:0070053	thrombospondin receptor activity	molecular_function	1	2	4	50	50	2.1948	0.153061	1
GO:0070052	collagen V binding	molecular_function	1	2	4	50	50	2.1948	0.153061	1
GO:0065001	specification of axis polarity	biological_process	1	2	3	50	66.6667	2.1948	0.153061	1
GO:0061364	apoptosis involved in luteolysis	biological_process	1	2	2	50	100	2.1948	0.153061	1
GO:0061054	dermatome development	biological_process	1	2	4	50	50	2.1948	0.153061	1
GO:0061002	negative regulation of dendritic spine morphogenesis	biological_process	1	2	3	50	66.6667	2.1948	0.153061	1
GO:0061000	negative regulation of dendritic spine development	biological_process	1	2	3	50	66.6667	2.1948	0.153061	1
GO:0060486	Clara cell differentiation	biological_process	1	2	3	50	66.6667	2.1948	0.153061	1
GO:0060452	positive regulation of cardiac muscle contraction	biological_process	1	2	5	50	40	2.1948	0.153061	1
GO:0060437	lung growth	biological_process	1	2	2	50	100	2.1948	0.153061	1
GO:0060336	negative regulation of interferon-gamma-mediated signaling pathway	biological_process	1	2	2	50	100	2.1948	0.153061	1
GO:0060331	negative regulation of response to interferon-gamma	biological_process	1	2	2	50	100	2.1948	0.153061	1
GO:0060318	definitive erythrocyte differentiation	biological_process	1	2	4	50	50	2.1948	0.153061	1
GO:0060267	positive regulation of respiratory burst	biological_process	1	2	4	50	50	2.1948	0.153061	1
GO:0051973	positive regulation of telomerase activity	biological_process	1	2	4	50	50	2.1948	0.153061	1
GO:0051764	actin crosslink formation	biological_process	1	2	3	50	66.6667	2.1948	0.153061	1
GO:0051594	detection of glucose	biological_process	1	2	2	50	100	2.1948	0.153061	1
GO:0051572	negative regulation of histone H3-K4 methylation	biological_process	1	2	3	50	66.6667	2.1948	0.153061	1
GO:0051451	myoblast migration	biological_process	1	2	3	50	66.6667	2.1948	0.153061	1
GO:0051388	positive regulation of nerve growth factor receptor signaling pathway	biological_process	1	2	3	50	66.6667	2.1948	0.153061	1
GO:0051286	cell tip	cellular_component	1	2	3	50	66.6667	2.1948	0.153061	1
GO:0051001	negative regulation of nitric-oxide synthase activity	biological_process	1	2	7	50	28.5714	2.1948	0.153061	1
GO:0050975	sensory perception of touch	biological_process	1	2	2	50	100	2.1948	0.153061	1
GO:0050942	positive regulation of pigment cell differentiation	biological_process	1	2	4	50	50	2.1948	0.153061	1
GO:0050508	glucuronosyl-N-acetylglucosaminyl-proteoglycan 4-alpha-N-acetylglucosaminyltransferase activity	molecular_function	1	2	3	50	66.6667	2.1948	0.153061	1
GO:0048861	leukemia inhibitory factor signaling pathway	biological_process	1	2	4	50	50	2.1948	0.153061	1
GO:0048845	venous blood vessel morphogenesis	biological_process	1	2	7	50	28.5714	2.1948	0.153061	1
GO:0048791	calcium ion-dependent exocytosis of neurotransmitter	biological_process	1	2	3	50	66.6667	2.1948	0.153061	1
GO:0048602	fibroblast growth factor 1 binding	molecular_function	1	2	7	50	28.5714	2.1948	0.153061	1
GO:0048599	oocyte development	biological_process	1	2	10	50	20	2.1948	0.153061	1
GO:0048387	negative regulation of retinoic acid receptor signaling pathway	biological_process	1	2	4	50	50	2.1948	0.153061	1
GO:0048341	paraxial mesoderm formation	biological_process	1	2	5	50	40	2.1948	0.153061	1
GO:0048237	rough endoplasmic reticulum lumen	cellular_component	1	2	3	50	66.6667	2.1948	0.153061	1
GO:0048133	male germ-line stem cell division	biological_process	1	2	3	50	66.6667	2.1948	0.153061	1
GO:0048101	calcium- and calmodulin-regulated 3',5'-cyclic-GMP phosphodiesterase activity	molecular_function	1	2	3	50	66.6667	2.1948	0.153061	1
GO:0048069	eye pigmentation	biological_process	1	2	2	50	100	2.1948	0.153061	1
GO:0048018	receptor agonist activity	molecular_function	1	2	5	50	40	2.1948	0.153061	1
GO:0047696	beta-adrenergic receptor kinase activity	molecular_function	1	2	2	50	100	2.1948	0.153061	1
GO:0046940	nucleoside monophosphate phosphorylation	biological_process	1	2	2	50	100	2.1948	0.153061	1
GO:0046168	glycerol-3-phosphate catabolic process	biological_process	1	2	4	50	50	2.1948	0.153061	1
GO:0045842	positive regulation of mitotic metaphase/anaphase transition	biological_process	1	2	4	50	50	2.1948	0.153061	1
GO:0045837	negative regulation of membrane potential	biological_process	1	2	3	50	66.6667	2.1948	0.153061	1
GO:0045636	positive regulation of melanocyte differentiation	biological_process	1	2	4	50	50	2.1948	0.153061	1
GO:0045585	positive regulation of cytotoxic T cell differentiation	biological_process	1	2	2	50	100	2.1948	0.153061	1
GO:0045583	regulation of cytotoxic T cell differentiation	biological_process	1	2	2	50	100	2.1948	0.153061	1
GO:0045545	syndecan binding	molecular_function	1	2	5	50	40	2.1948	0.153061	1
GO:0045475	locomotor rhythm	biological_process	1	2	10	50	20	2.1948	0.153061	1
GO:0045446	endothelial cell differentiation	biological_process	1	2	9	50	22.2222	2.1948	0.153061	1
GO:0045298	tubulin complex	cellular_component	1	2	4	50	50	2.1948	0.153061	1
GO:0045218	zonula adherens maintenance	biological_process	1	2	3	50	66.6667	2.1948	0.153061	1
GO:0045198	establishment of epithelial cell apical/basal polarity	biological_process	1	2	5	50	40	2.1948	0.153061	1
GO:0045074	regulation of interleukin-10 biosynthetic process	biological_process	1	2	3	50	66.6667	2.1948	0.153061	1
GO:0045063	T-helper 1 cell differentiation	biological_process	1	2	3	50	66.6667	2.1948	0.153061	1
GO:0045040	protein import into mitochondrial outer membrane	biological_process	1	2	4	50	50	2.1948	0.153061	1
GO:0044341	sodium-dependent phosphate transport	biological_process	1	2	4	50	50	2.1948	0.153061	1
GO:0044320	cellular response to leptin stimulus	biological_process	1	2	3	50	66.6667	2.1948	0.153061	1
GO:0044300	cerebellar mossy fiber	cellular_component	1	2	2	50	100	2.1948	0.153061	1
GO:0043578	nuclear matrix organization	biological_process	1	2	3	50	66.6667	2.1948	0.153061	1
GO:0043456	regulation of pentose-phosphate shunt	biological_process	1	2	3	50	66.6667	2.1948	0.153061	1
GO:0043455	regulation of secondary metabolic process	biological_process	1	2	3	50	66.6667	2.1948	0.153061	1
GO:0043374	CD8-positive, alpha-beta T cell differentiation	biological_process	1	2	6	50	33.3333	2.1948	0.153061	1
GO:0043259	laminin-10 complex	cellular_component	1	2	3	50	66.6667	2.1948	0.153061	1
GO:0043203	axon hillock	cellular_component	1	2	3	50	66.6667	2.1948	0.153061	1
GO:0043199	sulfate binding	molecular_function	1	2	3	50	66.6667	2.1948	0.153061	1
GO:0042984	regulation of amyloid precursor protein biosynthetic process	biological_process	1	2	5	50	40	2.1948	0.153061	1
GO:0042824	MHC class I peptide loading complex	cellular_component	1	2	3	50	66.6667	2.1948	0.153061	1
GO:0042745	circadian sleep/wake cycle	biological_process	1	2	4	50	50	2.1948	0.153061	1
GO:0042686	regulation of cardioblast cell fate specification	biological_process	1	2	3	50	66.6667	2.1948	0.153061	1
GO:0042609	CD4 receptor binding	molecular_function	1	2	5	50	40	2.1948	0.153061	1
GO:0042608	T cell receptor binding	molecular_function	1	2	3	50	66.6667	2.1948	0.153061	1
GO:0042501	serine phosphorylation of STAT protein	biological_process	1	2	3	50	66.6667	2.1948	0.153061	1
GO:0042378	quinone cofactor catabolic process	biological_process	1	2	2	50	100	2.1948	0.153061	1
GO:0042377	vitamin K catabolic process	biological_process	1	2	2	50	100	2.1948	0.153061	1
GO:0042376	phylloquinone catabolic process	biological_process	1	2	2	50	100	2.1948	0.153061	1
GO:0042374	phylloquinone metabolic process	biological_process	1	2	2	50	100	2.1948	0.153061	1
GO:0042363	fat-soluble vitamin catabolic process	biological_process	1	2	7	50	28.5714	2.1948	0.153061	1
GO:0042182	ketone catabolic process	biological_process	1	2	2	50	100	2.1948	0.153061	1
GO:0042117	monocyte activation	biological_process	1	2	2	50	100	2.1948	0.153061	1
GO:0042078	germ-line stem cell division	biological_process	1	2	3	50	66.6667	2.1948	0.153061	1
GO:0038003	opioid receptor signaling pathway	biological_process	1	2	3	50	66.6667	2.1948	0.153061	1
GO:0035850	epithelial cell differentiation involved in kidney development	biological_process	1	2	5	50	40	2.1948	0.153061	1
GO:0035845	photoreceptor cell outer segment organization	biological_process	1	2	3	50	66.6667	2.1948	0.153061	1
GO:0035814	negative regulation of renal sodium excretion	biological_process	1	2	6	50	33.3333	2.1948	0.153061	1
GO:0035615	clathrin adaptor activity	molecular_function	1	2	2	50	100	2.1948	0.153061	1
GO:0035607	fibroblast growth factor receptor signaling pathway involved in orbitofrontal cortex development	biological_process	1	2	3	50	66.6667	2.1948	0.153061	1
GO:0035413	positive regulation of catenin import into nucleus	biological_process	1	2	8	50	25	2.1948	0.153061	1
GO:0035408	histone H3-T6 phosphorylation	biological_process	1	2	2	50	100	2.1948	0.153061	1
GO:0035403	histone kinase activity (H3-T6 specific)	molecular_function	1	2	2	50	100	2.1948	0.153061	1
GO:0035241	protein-arginine omega-N monomethyltransferase activity	molecular_function	1	2	4	50	50	2.1948	0.153061	1
GO:0035106	operant conditioning	biological_process	1	2	3	50	66.6667	2.1948	0.153061	1
GO:0034993	SUN-KASH complex	cellular_component	1	2	6	50	33.3333	2.1948	0.153061	1
GO:0034988	Fc-gamma receptor I complex binding	molecular_function	1	2	2	50	100	2.1948	0.153061	1
GO:0034987	immunoglobulin receptor binding	molecular_function	1	2	3	50	66.6667	2.1948	0.153061	1
GO:0034619	cellular chaperone-mediated protein complex assembly	biological_process	1	2	3	50	66.6667	2.1948	0.153061	1
GO:0034287	detection of monosaccharide stimulus	biological_process	1	2	2	50	100	2.1948	0.153061	1
GO:0034248	regulation of cellular amide metabolic process	biological_process	1	2	3	50	66.6667	2.1948	0.153061	1
GO:0034118	regulation of erythrocyte aggregation	biological_process	1	2	2	50	100	2.1948	0.153061	1
GO:0034088	maintenance of mitotic sister chromatid cohesion	biological_process	1	2	4	50	50	2.1948	0.153061	1
GO:0034086	maintenance of sister chromatid cohesion	biological_process	1	2	4	50	50	2.1948	0.153061	1
GO:0034059	response to anoxia	biological_process	1	2	3	50	66.6667	2.1948	0.153061	1
GO:0033625	positive regulation of integrin activation	biological_process	1	2	5	50	40	2.1948	0.153061	1
GO:0033623	regulation of integrin activation	biological_process	1	2	5	50	40	2.1948	0.153061	1
GO:0033552	response to vitamin B3	biological_process	1	2	2	50	100	2.1948	0.153061	1
GO:0033278	cell proliferation in midbrain	biological_process	1	2	2	50	100	2.1948	0.153061	1
GO:0033136	serine phosphorylation of STAT3 protein	biological_process	1	2	3	50	66.6667	2.1948	0.153061	1
GO:0033026	negative regulation of mast cell apoptosis	biological_process	1	2	4	50	50	2.1948	0.153061	1
GO:0032964	collagen biosynthetic process	biological_process	1	2	6	50	33.3333	2.1948	0.153061	1
GO:0032910	regulation of transforming growth factor-beta3 production	biological_process	1	2	3	50	66.6667	2.1948	0.153061	1
GO:0032854	positive regulation of Rap GTPase activity	biological_process	1	2	4	50	50	2.1948	0.153061	1
GO:0032799	low-density lipoprotein receptor particle metabolic process	biological_process	1	2	2	50	100	2.1948	0.153061	1
GO:0032714	negative regulation of interleukin-5 production	biological_process	1	2	3	50	66.6667	2.1948	0.153061	1
GO:0032594	protein transport within lipid bilayer	biological_process	1	2	2	50	100	2.1948	0.153061	1
GO:0032509	endosome transport via multivesicular body sorting pathway	biological_process	1	2	3	50	66.6667	2.1948	0.153061	1
GO:0032241	positive regulation of nucleobase, nucleoside, nucleotide and nucleic acid transport	biological_process	1	2	2	50	100	2.1948	0.153061	1
GO:0032218	riboflavin transport	biological_process	1	2	2	50	100	2.1948	0.153061	1
GO:0032217	riboflavin transporter activity	molecular_function	1	2	2	50	100	2.1948	0.153061	1
GO:0032127	dense core granule membrane	cellular_component	1	2	3	50	66.6667	2.1948	0.153061	1
GO:0032025	response to cobalt ion	biological_process	1	2	6	50	33.3333	2.1948	0.153061	1
GO:0031981	nuclear lumen	cellular_component	1	2	3	50	66.6667	2.1948	0.153061	1
GO:0031762	follicle-stimulating hormone receptor binding	molecular_function	1	2	2	50	100	2.1948	0.153061	1
GO:0031692	alpha-1B adrenergic receptor binding	molecular_function	1	2	2	50	100	2.1948	0.153061	1
GO:0031691	alpha-1A adrenergic receptor binding	molecular_function	1	2	2	50	100	2.1948	0.153061	1
GO:0031666	positive regulation of lipopolysaccharide-mediated signaling pathway	biological_process	1	2	2	50	100	2.1948	0.153061	1
GO:0031630	regulation of synaptic vesicle fusion to presynaptic membrane	biological_process	1	2	2	50	100	2.1948	0.153061	1
GO:0031134	sister chromatid biorientation	biological_process	1	2	2	50	100	2.1948	0.153061	1
GO:0031117	positive regulation of microtubule depolymerization	biological_process	1	2	3	50	66.6667	2.1948	0.153061	1
GO:0030953	spindle astral microtubule organization	biological_process	1	2	4	50	50	2.1948	0.153061	1
GO:0030870	Mre11 complex	cellular_component	1	2	5	50	40	2.1948	0.153061	1
GO:0030859	polarized epithelial cell differentiation	biological_process	1	2	6	50	33.3333	2.1948	0.153061	1
GO:0030240	skeletal muscle thin filament assembly	biological_process	1	2	5	50	40	2.1948	0.153061	1
GO:0030210	heparin biosynthetic process	biological_process	1	2	2	50	100	2.1948	0.153061	1
GO:0030202	heparin metabolic process	biological_process	1	2	3	50	66.6667	2.1948	0.153061	1
GO:0030007	cellular potassium ion homeostasis	biological_process	1	2	3	50	66.6667	2.1948	0.153061	1
GO:0021943	formation of radial glial scaffolds	biological_process	1	2	2	50	100	2.1948	0.153061	1
GO:0021800	cerebral cortex tangential migration	biological_process	1	2	3	50	66.6667	2.1948	0.153061	1
GO:0021773	striatal medium spiny neuron differentiation	biological_process	1	2	2	50	100	2.1948	0.153061	1
GO:0021769	orbitofrontal cortex development	biological_process	1	2	3	50	66.6667	2.1948	0.153061	1
GO:0021636	trigeminal nerve morphogenesis	biological_process	1	2	2	50	100	2.1948	0.153061	1
GO:0021610	facial nerve morphogenesis	biological_process	1	2	2	50	100	2.1948	0.153061	1
GO:0021575	hindbrain morphogenesis	biological_process	1	2	5	50	40	2.1948	0.153061	1
GO:0021558	trochlear nerve development	biological_process	1	2	2	50	100	2.1948	0.153061	1
GO:0021557	oculomotor nerve development	biological_process	1	2	2	50	100	2.1948	0.153061	1
GO:0021553	olfactory nerve development	biological_process	1	2	2	50	100	2.1948	0.153061	1
GO:0021506	anterior neuropore closure	biological_process	1	2	2	50	100	2.1948	0.153061	1
GO:0019563	glycerol catabolic process	biological_process	1	2	4	50	50	2.1948	0.153061	1
GO:0019551	glutamate catabolic process to 2-oxoglutarate	biological_process	1	2	2	50	100	2.1948	0.153061	1
GO:0019550	glutamate catabolic process to aspartate	biological_process	1	2	2	50	100	2.1948	0.153061	1
GO:0019067	viral assembly, maturation, egress, and release	biological_process	1	2	2	50	100	2.1948	0.153061	1
GO:0017071	intracellular cyclic nucleotide activated cation channel complex	cellular_component	1	2	3	50	66.6667	2.1948	0.153061	1
GO:0017034	Rap guanyl-nucleotide exchange factor activity	molecular_function	1	2	2	50	100	2.1948	0.153061	1
GO:0016942	insulin-like growth factor binding protein complex	cellular_component	1	2	3	50	66.6667	2.1948	0.153061	1
GO:0016842	amidine-lyase activity	molecular_function	1	2	3	50	66.6667	2.1948	0.153061	1
GO:0016715	oxidoreductase activity, acting on paired donors, with incorporation or reduction of molecular oxygen, reduced ascorbate as one donor, and incorporation of one atom of oxygen	molecular_function	1	2	4	50	50	2.1948	0.153061	1
GO:0016492	neurotensin receptor activity, G-protein coupled	molecular_function	1	2	2	50	100	2.1948	0.153061	1
GO:0015321	sodium-dependent phosphate transmembrane transporter activity	molecular_function	1	2	4	50	50	2.1948	0.153061	1
GO:0015279	store-operated calcium channel activity	molecular_function	1	2	5	50	40	2.1948	0.153061	1
GO:0015173	aromatic amino acid transmembrane transporter activity	molecular_function	1	2	2	50	100	2.1948	0.153061	1
GO:0014898	cardiac muscle hypertrophy in response to stress	biological_process	1	2	3	50	66.6667	2.1948	0.153061	1
GO:0014897	striated muscle hypertrophy	biological_process	1	2	4	50	50	2.1948	0.153061	1
GO:0014887	cardiac muscle adaptation	biological_process	1	2	3	50	66.6667	2.1948	0.153061	1
GO:0010939	regulation of necrotic cell death	biological_process	1	2	9	50	22.2222	2.1948	0.153061	1
GO:0010694	positive regulation of alkaline phosphatase activity	biological_process	1	2	5	50	40	2.1948	0.153061	1
GO:0010637	negative regulation of mitochondrial fusion	biological_process	1	2	2	50	100	2.1948	0.153061	1
GO:0010635	regulation of mitochondrial fusion	biological_process	1	2	2	50	100	2.1948	0.153061	1
GO:0009997	negative regulation of cardioblast cell fate specification	biological_process	1	2	3	50	66.6667	2.1948	0.153061	1
GO:0009732	detection of hexose stimulus	biological_process	1	2	2	50	100	2.1948	0.153061	1
GO:0009730	detection of carbohydrate stimulus	biological_process	1	2	2	50	100	2.1948	0.153061	1
GO:0009405	pathogenesis	biological_process	1	2	3	50	66.6667	2.1948	0.153061	1
GO:0009374	biotin binding	molecular_function	1	2	4	50	50	2.1948	0.153061	1
GO:0009223	pyrimidine deoxyribonucleotide catabolic process	biological_process	1	2	3	50	66.6667	2.1948	0.153061	1
GO:0009111	vitamin catabolic process	biological_process	1	2	11	50	18.1818	2.1948	0.153061	1
GO:0008476	protein-tyrosine sulfotransferase activity	molecular_function	1	2	2	50	100	2.1948	0.153061	1
GO:0008332	low voltage-gated calcium channel activity	molecular_function	1	2	3	50	66.6667	2.1948	0.153061	1
GO:0008228	opsonization	biological_process	1	2	4	50	50	2.1948	0.153061	1
GO:0007403	glial cell fate determination	biological_process	1	2	3	50	66.6667	2.1948	0.153061	1
GO:0007185	transmembrane receptor protein tyrosine phosphatase signaling pathway	biological_process	1	2	2	50	100	2.1948	0.153061	1
GO:0007168	receptor guanylyl cyclase signaling pathway	biological_process	1	2	6	50	33.3333	2.1948	0.153061	1
GO:0007129	synapsis	biological_process	1	2	11	50	18.1818	2.1948	0.153061	1
GO:0007095	mitotic cell cycle G2/M transition DNA damage checkpoint	biological_process	1	2	7	50	28.5714	2.1948	0.153061	1
GO:0006987	activation of signaling protein activity involved in unfolded protein response	biological_process	1	2	3	50	66.6667	2.1948	0.153061	1
GO:0006828	manganese ion transport	biological_process	1	2	9	50	22.2222	2.1948	0.153061	1
GO:0006713	glucocorticoid catabolic process	biological_process	1	2	2	50	100	2.1948	0.153061	1
GO:0006543	glutamine catabolic process	biological_process	1	2	3	50	66.6667	2.1948	0.153061	1
GO:0006533	aspartate catabolic process	biological_process	1	2	2	50	100	2.1948	0.153061	1
GO:0006532	aspartate biosynthetic process	biological_process	1	2	2	50	100	2.1948	0.153061	1
GO:0006297	nucleotide-excision repair, DNA gap filling	biological_process	1	2	6	50	33.3333	2.1948	0.153061	1
GO:0006116	NADH oxidation	biological_process	1	2	3	50	66.6667	2.1948	0.153061	1
GO:0006060	sorbitol metabolic process	biological_process	1	2	2	50	100	2.1948	0.153061	1
GO:0005955	calcineurin complex	cellular_component	1	2	2	50	100	2.1948	0.153061	1
GO:0005865	striated muscle thin filament	cellular_component	1	2	6	50	33.3333	2.1948	0.153061	1
GO:0005678	chromatin assembly complex	cellular_component	1	2	4	50	50	2.1948	0.153061	1
GO:0005610	laminin-5 complex	cellular_component	1	2	4	50	50	2.1948	0.153061	1
GO:0005608	laminin-3 complex	cellular_component	1	2	3	50	66.6667	2.1948	0.153061	1
GO:0005607	laminin-2 complex	cellular_component	1	2	2	50	100	2.1948	0.153061	1
GO:0005302	L-tyrosine transmembrane transporter activity	molecular_function	1	2	2	50	100	2.1948	0.153061	1
GO:0005052	peroxisome matrix targeting signal-1 binding	molecular_function	1	2	2	50	100	2.1948	0.153061	1
GO:0005030	neurotrophin receptor activity	molecular_function	1	2	4	50	50	2.1948	0.153061	1
GO:0004999	vasoactive intestinal polypeptide receptor activity	molecular_function	1	2	3	50	66.6667	2.1948	0.153061	1
GO:0004969	histamine receptor activity	molecular_function	1	2	4	50	50	2.1948	0.153061	1
GO:0004924	oncostatin-M receptor activity	molecular_function	1	2	3	50	66.6667	2.1948	0.153061	1
GO:0004923	leukemia inhibitory factor receptor activity	molecular_function	1	2	2	50	100	2.1948	0.153061	1
GO:0004908	interleukin-1 receptor activity	molecular_function	1	2	7	50	28.5714	2.1948	0.153061	1
GO:0004740	pyruvate dehydrogenase (acetyl-transferring) kinase activity	molecular_function	1	2	4	50	50	2.1948	0.153061	1
GO:0004724	magnesium-dependent protein serine/threonine phosphatase activity	molecular_function	1	2	3	50	66.6667	2.1948	0.153061	1
GO:0004723	calcium-dependent protein serine/threonine phosphatase activity	molecular_function	1	2	3	50	66.6667	2.1948	0.153061	1
GO:0004619	phosphoglycerate mutase activity	molecular_function	1	2	4	50	50	2.1948	0.153061	1
GO:0004614	phosphoglucomutase activity	molecular_function	1	2	5	50	40	2.1948	0.153061	1
GO:0004572	mannosyl-oligosaccharide 1,3-1,6-alpha-mannosidase activity	molecular_function	1	2	2	50	100	2.1948	0.153061	1
GO:0004476	mannose-6-phosphate isomerase activity	molecular_function	1	2	2	50	100	2.1948	0.153061	1
GO:0004449	isocitrate dehydrogenase (NAD+) activity	molecular_function	1	2	3	50	66.6667	2.1948	0.153061	1
GO:0004368	glycerol-3-phosphate dehydrogenase activity	molecular_function	1	2	2	50	100	2.1948	0.153061	1
GO:0004340	glucokinase activity	molecular_function	1	2	2	50	100	2.1948	0.153061	1
GO:0004167	dopachrome isomerase activity	molecular_function	1	2	2	50	100	2.1948	0.153061	1
GO:0004117	calmodulin-dependent cyclic-nucleotide phosphodiesterase activity	molecular_function	1	2	3	50	66.6667	2.1948	0.153061	1
GO:0004090	carbonyl reductase (NADPH) activity	molecular_function	1	2	5	50	40	2.1948	0.153061	1
GO:0004083	2,3-bisphospho-D-glycerate 2-phosphohydrolase activity	molecular_function	1	2	4	50	50	2.1948	0.153061	1
GO:0004082	bisphosphoglycerate mutase activity	molecular_function	1	2	4	50	50	2.1948	0.153061	1
GO:0004069	L-aspartate	molecular_function	1	2	2	50	100	2.1948	0.153061	1
GO:0003680	AT DNA binding	molecular_function	1	2	6	50	33.3333	2.1948	0.153061	1
GO:0003420	regulation of growth plate cartilage chondrocyte proliferation	biological_process	1	2	2	50	100	2.1948	0.153061	1
GO:0003407	neural retina development	biological_process	1	2	5	50	40	2.1948	0.153061	1
GO:0003308	negative regulation of Wnt receptor signaling pathway involved in heart development	biological_process	1	2	4	50	50	2.1948	0.153061	1
GO:0003307	regulation of Wnt receptor signaling pathway involved in heart development	biological_process	1	2	5	50	40	2.1948	0.153061	1
GO:0003300	cardiac muscle hypertrophy	biological_process	1	2	4	50	50	2.1948	0.153061	1
GO:0003299	muscle hypertrophy in response to stress	biological_process	1	2	3	50	66.6667	2.1948	0.153061	1
GO:0003139	secondary heart field specification	biological_process	1	2	5	50	40	2.1948	0.153061	1
GO:0003136	negative regulation of heart induction by canonical Wnt receptor signaling pathway	biological_process	1	2	3	50	66.6667	2.1948	0.153061	1
GO:0003128	heart field specification	biological_process	1	2	5	50	40	2.1948	0.153061	1
GO:0003093	regulation of glomerular filtration	biological_process	1	2	5	50	40	2.1948	0.153061	1
GO:0003032	detection of oxygen	biological_process	1	2	4	50	50	2.1948	0.153061	1
GO:0002842	positive regulation of T cell mediated immune response to tumor cell	biological_process	1	2	2	50	100	2.1948	0.153061	1
GO:0002840	regulation of T cell mediated immune response to tumor cell	biological_process	1	2	3	50	66.6667	2.1948	0.153061	1
GO:0002553	histamine secretion by mast cell	biological_process	1	2	5	50	40	2.1948	0.153061	1
GO:0002540	leukotriene production involved in inflammatory response	biological_process	1	2	5	50	40	2.1948	0.153061	1
GO:0002441	histamine secretion involved in inflammatory response	biological_process	1	2	5	50	40	2.1948	0.153061	1
GO:0002175	protein localization to paranode region of axon	biological_process	1	2	3	50	66.6667	2.1948	0.153061	1
GO:0001977	renal system process involved in regulation of blood volume	biological_process	1	2	7	50	28.5714	2.1948	0.153061	1
GO:0001972	retinoic acid binding	molecular_function	1	2	12	50	16.6667	2.1948	0.153061	1
GO:0001883	purine nucleoside binding	molecular_function	1	2	4	50	50	2.1948	0.153061	1
GO:0001832	blastocyst growth	biological_process	1	2	5	50	40	2.1948	0.153061	1
GO:0001641	group II metabotropic glutamate receptor activity	molecular_function	1	2	2	50	100	2.1948	0.153061	1
GO:0001543	ovarian follicle rupture	biological_process	1	2	3	50	66.6667	2.1948	0.153061	1
GO:0000253	3-keto sterol reductase activity	molecular_function	1	2	3	50	66.6667	2.1948	0.153061	1
GO:0009746	response to hexose stimulus	biological_process	9	57	104	15.7895	54.8077	2.1865	0.0437455	0.860671
GO:0006936	muscle contraction	biological_process	9	57	107	15.7895	53.271	2.1865	0.0437455	0.860671
GO:0070542	response to fatty acid	biological_process	3	12	25	25	48	2.17952	0.0644812	0.863358
GO:0060043	regulation of cardiac muscle cell proliferation	biological_process	3	12	25	25	48	2.17952	0.0644812	0.863358
GO:0055093	response to hyperoxia	biological_process	3	12	26	25	46.1538	2.17952	0.0644812	0.863358
GO:0051117	ATPase binding	molecular_function	3	12	24	25	50	2.17952	0.0644812	0.863358
GO:0050982	detection of mechanical stimulus	biological_process	3	12	26	25	46.1538	2.17952	0.0644812	0.863358
GO:0050850	positive regulation of calcium-mediated signaling	biological_process	3	12	24	25	50	2.17952	0.0644812	0.863358
GO:0044259	multicellular organismal macromolecule metabolic process	biological_process	3	12	32	25	37.5	2.17952	0.0644812	0.863358
GO:0032590	dendrite membrane	cellular_component	3	12	15	25	80	2.17952	0.0644812	0.863358
GO:0019228	regulation of action potential in neuron	biological_process	3	12	22	25	54.5455	2.17952	0.0644812	0.863358
GO:0007274	neuromuscular synaptic transmission	biological_process	3	12	18	25	66.6667	2.17952	0.0644812	0.863358
GO:0002040	sprouting angiogenesis	biological_process	3	12	14	25	85.7143	2.17952	0.0644812	0.863358
GO:0016247	channel regulator activity	molecular_function	6	33	56	18.1818	58.9286	2.16979	0.0436007	0.860671
GO:0051235	maintenance of location	biological_process	8	49	91	16.3265	53.8462	2.16554	0.0551761	0.863358
GO:0051093	negative regulation of developmental process	biological_process	31	270	489	11.4815	55.2147	2.16277	0.0390336	0.806072
GO:2000027	regulation of organ morphogenesis	biological_process	10	66	123	15.1515	53.6585	2.16192	0.0391215	0.806072
GO:0035295	tube development	biological_process	7	41	86	17.0732	47.6744	2.15692	0.0412797	0.824432
GO:0004672	protein kinase activity	molecular_function	37	333	640	11.1111	52.0312	2.15629	0.0384671	0.804725
GO:0031329	regulation of cellular catabolic process	biological_process	30	260	427	11.5385	60.8899	2.15555	0.0361749	0.773223
GO:0001932	regulation of protein phosphorylation	biological_process	43	397	683	10.8312	58.1259	2.15254	0.0366672	0.776126
GO:0040013	negative regulation of locomotion	biological_process	11	75	114	14.6667	65.7895	2.1501	0.0489612	0.863358
GO:0016311	dephosphorylation	biological_process	16	121	200	13.2231	60.5	2.1478	0.0408906	0.824432
GO:0044262	cellular carbohydrate metabolic process	biological_process	30	261	487	11.4943	53.5934	2.13305	0.0368809	0.777906
GO:0034284	response to monosaccharide stimulus	biological_process	9	58	106	15.5172	54.717	2.12893	0.0466834	0.863358
GO:0005887	integral to plasma membrane	cellular_component	23	190	467	12.1053	40.6852	2.1269	0.0412421	0.824432
GO:0004674	protein serine/threonine kinase activity	molecular_function	34	303	575	11.2211	52.6957	2.12525	0.0397827	0.80843
GO:0051966	regulation of synaptic transmission, glutamatergic	biological_process	5	26	35	19.2308	74.2857	2.12298	0.051389	0.863358
GO:0048814	regulation of dendrite morphogenesis	biological_process	5	26	39	19.2308	66.6667	2.12298	0.051389	0.863358
GO:0031670	cellular response to nutrient	biological_process	5	26	54	19.2308	48.1481	2.12298	0.051389	0.863358
GO:0001952	regulation of cell-matrix adhesion	biological_process	5	26	55	19.2308	47.2727	2.12298	0.051389	0.863358
GO:0045735	nutrient reservoir activity	molecular_function	35	314	1773	11.1465	17.7101	2.11515	0.0430046	0.850905
GO:0046578	regulation of Ras protein signal transduction	biological_process	13	94	151	13.8298	62.2517	2.1085	0.0516208	0.863358
GO:0030136	clathrin-coated vesicle	cellular_component	13	94	143	13.8298	65.7343	2.1085	0.0516208	0.863358
GO:0060076	excitatory synapse	cellular_component	4	19	24	21.0526	79.1667	2.10763	0.0592918	0.863358
GO:0021675	nerve development	biological_process	4	19	28	21.0526	67.8571	2.10763	0.0592918	0.863358
GO:0001975	response to amphetamine	biological_process	4	19	29	21.0526	65.5172	2.10763	0.0592918	0.863358
GO:0043413	macromolecule glycosylation	biological_process	8	50	96	16	52.0833	2.10216	0.0580667	0.863358
GO:0007218	neuropeptide signaling pathway	biological_process	8	50	97	16	51.5464	2.10216	0.0580667	0.863358
GO:0006486	protein glycosylation	biological_process	8	50	96	16	52.0833	2.10216	0.0580667	0.863358
GO:0006810	transport	biological_process	147	1587	2859	9.26276	55.5089	2.09411	0.0409914	0.824432
GO:0051234	establishment of localization	biological_process	149	1611	2908	9.24891	55.3989	2.09066	0.0421871	0.838779
GO:0031100	organ regeneration	biological_process	6	34	63	17.6471	53.9683	2.0872	0.0495211	0.863358
GO:0005913	cell-cell adherens junction	cellular_component	6	34	53	17.6471	64.1509	2.0872	0.0495211	0.863358
GO:0045185	maintenance of protein location	biological_process	7	42	74	16.6667	56.7568	2.0857	0.0462718	0.863358
GO:0010769	regulation of cell morphogenesis involved in differentiation	biological_process	14	104	167	13.4615	62.2754	2.0796	0.0445902	0.863358
GO:0043085	positive regulation of catalytic activity	biological_process	45	423	762	10.6383	55.5118	2.0752	0.0427873	0.847918
GO:0048598	embryonic morphogenesis	biological_process	22	182	357	12.0879	50.9804	2.07197	0.0510421	0.863358
GO:0031399	regulation of protein modification process	biological_process	50	478	806	10.4603	59.3052	2.0654	0.0454462	0.863358
GO:0061138	morphogenesis of a branching epithelium	biological_process	12	86	141	13.9535	60.9929	2.05844	0.0458182	0.863358
GO:0006820	anion transport	biological_process	12	86	171	13.9535	50.2924	2.05844	0.0458182	0.863358
GO:0051248	negative regulation of protein metabolic process	biological_process	18	143	250	12.5874	57.2	2.05487	0.0591136	0.863358
GO:0035023	regulation of Rho protein signal transduction	biological_process	8	51	88	15.6863	57.9545	2.04024	0.0613653	0.863358
GO:0005635	nuclear envelope	cellular_component	8	51	87	15.6863	58.6207	2.04024	0.0613653	0.863358
GO:0071840	cellular component organization or biogenesis	biological_process	151	1642	2943	9.1961	55.7934	2.02775	0.0439748	0.862703
GO:0006468	protein phosphorylation	biological_process	44	415	788	10.6024	52.665	2.02689	0.0506677	0.863358
GO:0050805	negative regulation of synaptic transmission	biological_process	5	27	36	18.5185	75	2.02669	0.0591016	0.863358
GO:0048169	regulation of long-term neuronal synaptic plasticity	biological_process	5	27	33	18.5185	81.8182	2.02669	0.0591016	0.863358
GO:0022008	neurogenesis	biological_process	5	27	49	18.5185	55.102	2.02669	0.0591016	0.863358
GO:0019318	hexose metabolic process	biological_process	13	96	192	13.5417	50	2.02626	0.0551711	0.863358
GO:0008194	UDP-glycosyltransferase activity	molecular_function	7	43	112	16.2791	38.3929	2.01643	0.0795036	0.863358
GO:0071842	cellular component organization at cellular level	biological_process	119	1267	2255	9.39227	56.1863	2.01567	0.0500022	0.863358
GO:0061005	cell differentiation involved in kidney development	biological_process	2	7	15	28.5714	46.6667	2.01318	0.101873	1
GO:0061001	regulation of dendritic spine morphogenesis	biological_process	2	7	12	28.5714	58.3333	2.01318	0.101873	1
GO:0060536	cartilage morphogenesis	biological_process	2	7	10	28.5714	70	2.01318	0.101873	1
GO:0060484	lung-associated mesenchyme development	biological_process	2	7	10	28.5714	70	2.01318	0.101873	1
GO:0051967	negative regulation of synaptic transmission, glutamatergic	biological_process	2	7	8	28.5714	87.5	2.01318	0.101873	1
GO:0051938	L-glutamate import	biological_process	2	7	8	28.5714	87.5	2.01318	0.101873	1
GO:0048841	regulation of axon extension involved in axon guidance	biological_process	2	7	12	28.5714	58.3333	2.01318	0.101873	1
GO:0046113	nucleobase catabolic process	biological_process	2	7	9	28.5714	77.7778	2.01318	0.101873	1
GO:0044243	multicellular organismal catabolic process	biological_process	2	7	20	28.5714	35	2.01318	0.101873	1
GO:0043949	regulation of cAMP-mediated signaling	biological_process	2	7	8	28.5714	87.5	2.01318	0.101873	1
GO:0043508	negative regulation of JUN kinase activity	biological_process	2	7	10	28.5714	70	2.01318	0.101873	1
GO:0043274	phospholipase binding	molecular_function	2	7	17	28.5714	41.1765	2.01318	0.101873	1
GO:0035418	protein localization to synapse	biological_process	2	7	8	28.5714	87.5	2.01318	0.101873	1
GO:0035004	phosphatidylinositol 3-kinase activity	molecular_function	2	7	11	28.5714	63.6364	2.01318	0.101873	1
GO:0034391	regulation of smooth muscle cell apoptosis	biological_process	2	7	12	28.5714	58.3333	2.01318	0.101873	1
GO:0034110	regulation of homotypic cell-cell adhesion	biological_process	2	7	13	28.5714	53.8462	2.01318	0.101873	1
GO:0030553	cGMP binding	molecular_function	2	7	12	28.5714	58.3333	2.01318	0.101873	1
GO:0030140	trans-Golgi network transport vesicle	cellular_component	2	7	11	28.5714	63.6364	2.01318	0.101873	1
GO:0030104	water homeostasis	biological_process	2	7	11	28.5714	63.6364	2.01318	0.101873	1
GO:0016327	apicolateral plasma membrane	cellular_component	2	7	9	28.5714	77.7778	2.01318	0.101873	1
GO:0016303	1-phosphatidylinositol-3-kinase activity	molecular_function	2	7	11	28.5714	63.6364	2.01318	0.101873	1
GO:0014902	myotube differentiation	biological_process	2	7	11	28.5714	63.6364	2.01318	0.101873	1
GO:0014821	phasic smooth muscle contraction	biological_process	2	7	16	28.5714	43.75	2.01318	0.101873	1
GO:0010984	regulation of lipoprotein particle clearance	biological_process	2	7	11	28.5714	63.6364	2.01318	0.101873	1
GO:0009219	pyrimidine deoxyribonucleotide metabolic process	biological_process	2	7	10	28.5714	70	2.01318	0.101873	1
GO:0008889	glycerophosphodiester phosphodiesterase activity	molecular_function	2	7	8	28.5714	87.5	2.01318	0.101873	1
GO:0006809	nitric oxide biosynthetic process	biological_process	2	7	9	28.5714	77.7778	2.01318	0.101873	1
GO:0006208	pyrimidine base catabolic process	biological_process	2	7	8	28.5714	87.5	2.01318	0.101873	1
GO:0005915	zonula adherens	cellular_component	2	7	8	28.5714	87.5	2.01318	0.101873	1
GO:0005605	basal lamina	cellular_component	2	7	17	28.5714	41.1765	2.01318	0.101873	1
GO:0002092	positive regulation of receptor internalization	biological_process	2	7	10	28.5714	70	2.01318	0.101873	1
GO:0001736	establishment of planar polarity	biological_process	2	7	13	28.5714	53.8462	2.01318	0.101873	1
GO:0060998	regulation of dendritic spine development	biological_process	3	13	21	23.0769	61.9048	2.01246	0.0790302	0.863358
GO:0051968	positive regulation of synaptic transmission, glutamatergic	biological_process	3	13	18	23.0769	72.2222	2.01246	0.0790302	0.863358
GO:0051965	positive regulation of synaptogenesis	biological_process	3	13	20	23.0769	65	2.01246	0.0790302	0.863358
GO:0051962	positive regulation of nervous system development	biological_process	3	13	20	23.0769	65	2.01246	0.0790302	0.863358
GO:0048512	circadian behavior	biological_process	3	13	34	23.0769	38.2353	2.01246	0.0790302	0.863358
GO:0044089	positive regulation of cellular component biogenesis	biological_process	3	13	21	23.0769	61.9048	2.01246	0.0790302	0.863358
GO:0034446	substrate adhesion-dependent cell spreading	biological_process	3	13	23	23.0769	56.5217	2.01246	0.0790302	0.863358
GO:0022839	ion gated channel activity	molecular_function	3	13	23	23.0769	56.5217	2.01246	0.0790302	0.863358
GO:0017145	stem cell division	biological_process	3	13	25	23.0769	52	2.01246	0.0790302	0.863358
GO:0015758	glucose transport	biological_process	3	13	32	23.0769	40.625	2.01246	0.0790302	0.863358
GO:0010660	regulation of muscle cell apoptosis	biological_process	3	13	23	23.0769	56.5217	2.01246	0.0790302	0.863358
GO:0009394	2'-deoxyribonucleotide metabolic process	biological_process	3	13	21	23.0769	61.9048	2.01246	0.0790302	0.863358
GO:0001968	fibronectin binding	molecular_function	3	13	21	23.0769	61.9048	2.01246	0.0790302	0.863358
GO:0042110	T cell activation	biological_process	10	69	149	14.4928	46.3087	2.00807	0.0679606	0.863358
GO:0060627	regulation of vesicle-mediated transport	biological_process	16	125	209	12.8	59.8086	2.00762	0.064144	0.863358
GO:0043523	regulation of neuron apoptosis	biological_process	14	106	172	13.2075	61.6279	2.00262	0.0673303	0.863358
GO:0055080	cation homeostasis	biological_process	22	185	364	11.8919	50.8242	1.98986	0.0539459	0.863358
GO:0051605	protein maturation by peptide bond cleavage	biological_process	4	20	34	20	58.8235	1.98851	0.0696268	0.863358
GO:0043471	regulation of cellular carbohydrate catabolic process	biological_process	4	20	30	20	66.6667	1.98851	0.0696268	0.863358
GO:0043470	regulation of carbohydrate catabolic process	biological_process	4	20	30	20	66.6667	1.98851	0.0696268	0.863358
GO:0033613	activating transcription factor binding	molecular_function	4	20	42	20	47.619	1.98851	0.0696268	0.863358
GO:0022904	respiratory electron transport chain	biological_process	4	20	34	20	58.8235	1.98851	0.0696268	0.863358
GO:0021549	cerebellum development	biological_process	4	20	27	20	74.0741	1.98851	0.0696268	0.863358
GO:0008188	neuropeptide receptor activity	molecular_function	4	20	41	20	48.7805	1.98851	0.0696268	0.863358
GO:0007566	embryo implantation	biological_process	4	20	29	20	68.9655	1.98851	0.0696268	0.863358
GO:0001755	neural crest cell migration	biological_process	4	20	35	20	57.1429	1.98851	0.0696268	0.863358
GO:0030003	cellular cation homeostasis	biological_process	19	155	310	12.2581	50	1.98809	0.0517944	0.863358
GO:0009749	response to glucose stimulus	biological_process	8	52	98	15.3846	53.0612	1.97972	0.0650691	0.863358
GO:0034613	cellular protein localization	biological_process	12	88	156	13.6364	56.4103	1.97209	0.070248	0.863358
GO:0060548	negative regulation of cell death	biological_process	36	332	577	10.8434	57.539	1.9694	0.0620078	0.863358
GO:0051606	detection of stimulus	biological_process	9	61	150	14.7541	40.6667	1.96285	0.057319	0.863358
GO:0051338	regulation of transferase activity	biological_process	34	311	515	10.9325	60.3883	1.96284	0.0547989	0.863358
GO:0051271	negative regulation of cellular component movement	biological_process	10	70	105	14.2857	66.6667	1.95847	0.0704115	0.863358
GO:0023057	negative regulation of signaling	biological_process	33	301	481	10.9635	62.578	1.9501	0.0645266	0.863358
GO:0006874	cellular calcium ion homeostasis	biological_process	15	117	225	12.8205	52	1.94968	0.0580495	0.863358
GO:0005089	Rho guanyl-nucleotide exchange factor activity	molecular_function	7	44	75	15.9091	58.6667	1.94903	0.0830094	0.89087
GO:0035239	tube morphogenesis	biological_process	13	98	190	13.2653	51.5789	1.94593	0.0595615	0.863358
GO:0051345	positive regulation of hydrolase activity	biological_process	22	187	360	11.7647	51.9444	1.93593	0.0564356	0.863358
GO:0060562	epithelial tube morphogenesis	biological_process	5	28	45	17.8571	62.2222	1.93458	0.0674366	0.863358
GO:0051970	negative regulation of transmission of nerve impulse	biological_process	5	28	40	17.8571	70	1.93458	0.0674366	0.863358
GO:0033135	regulation of peptidyl-serine phosphorylation	biological_process	5	28	51	17.8571	54.902	1.93458	0.0674366	0.863358
GO:0030175	filopodium	cellular_component	5	28	47	17.8571	59.5745	1.93458	0.0674366	0.863358
GO:0042734	presynaptic membrane	cellular_component	6	36	55	16.6667	65.4545	1.93033	0.0627757	0.863358
GO:0010648	negative regulation of cell communication	biological_process	33	302	482	10.9272	62.6556	1.92976	0.0650447	0.863358
GO:0070727	cellular macromolecule localization	biological_process	12	89	159	13.4831	55.9748	1.92974	0.0722067	0.863358
GO:0048522	positive regulation of cellular process	biological_process	137	1489	2685	9.20081	55.4562	1.91858	0.059311	0.863358
GO:0048754	branching morphogenesis of a tube	biological_process	11	80	139	13.75	57.554	1.91717	0.0617247	0.863358
GO:0044093	positive regulation of molecular function	biological_process	53	521	938	10.1727	55.5437	1.91213	0.0661044	0.863358
GO:0045637	regulation of myeloid cell differentiation	biological_process	10	71	136	14.0845	52.2059	1.90968	0.0731903	0.863358
GO:0016051	carbohydrate biosynthetic process	biological_process	13	99	185	13.1313	53.5135	1.90645	0.0620711	0.863358
GO:0051270	regulation of cellular component movement	biological_process	25	219	390	11.4155	56.1538	1.90569	0.075191	0.863358
GO:0007275	multicellular organismal development	biological_process	46	445	911	10.3371	48.8474	1.8906	0.0717761	0.863358
GO:0046942	carboxylic acid transport	biological_process	12	90	166	13.3333	54.2169	1.88792	0.0744311	0.863358
GO:0043066	negative regulation of apoptosis	biological_process	34	315	547	10.7937	57.5868	1.88328	0.0707467	0.863358
GO:0051336	regulation of hydrolase activity	biological_process	41	391	747	10.4859	52.3427	1.87773	0.0689711	0.863358
GO:2000106	regulation of leukocyte apoptosis	biological_process	4	21	48	19.0476	43.75	1.8764	0.0808199	0.871763
GO:0022029	telencephalon cell migration	biological_process	4	21	33	19.0476	63.6364	1.8764	0.0808199	0.871763
GO:0004715	non-membrane spanning protein tyrosine kinase activity	molecular_function	4	21	43	19.0476	48.8372	1.8764	0.0808199	0.871763
GO:0001959	regulation of cytokine-mediated signaling pathway	biological_process	4	21	34	19.0476	61.7647	1.8764	0.0808199	0.871763
GO:0008236	serine-type peptidase activity	molecular_function	11	81	233	13.5802	34.7639	1.87256	0.0937407	0.98176
GO:0035556	intracellular signal transduction	biological_process	59	591	1030	9.98308	57.3786	1.86887	0.0702369	0.863358
GO:0005096	GTPase activator activity	molecular_function	17	139	221	12.2302	62.8959	1.86877	0.0796221	0.863358
GO:0090257	regulation of muscle system process	biological_process	8	54	98	14.8148	55.102	1.8626	0.0736782	0.863358
GO:0070085	glycosylation	biological_process	8	54	123	14.8148	43.9024	1.8626	0.0736782	0.863358
GO:0055007	cardiac muscle cell differentiation	biological_process	3	14	28	21.4286	50	1.86065	0.0948579	0.98176
GO:0046068	cGMP metabolic process	biological_process	3	14	27	21.4286	51.8519	1.86065	0.0948579	0.98176
GO:0044236	multicellular organismal metabolic process	biological_process	3	14	37	21.4286	37.8378	1.86065	0.0948579	0.98176
GO:0043392	negative regulation of DNA binding	biological_process	3	14	31	21.4286	45.1613	1.86065	0.0948579	0.98176
GO:0043113	receptor clustering	biological_process	3	14	22	21.4286	63.6364	1.86065	0.0948579	0.98176
GO:0042974	retinoic acid receptor binding	molecular_function	3	14	17	21.4286	82.3529	1.86065	0.0948579	0.98176
GO:0032420	stereocilium	cellular_component	3	14	19	21.4286	73.6842	1.86065	0.0948579	0.98176
GO:0030004	cellular monovalent inorganic cation homeostasis	biological_process	3	14	27	21.4286	51.8519	1.86065	0.0948579	0.98176
GO:0022409	positive regulation of cell-cell adhesion	biological_process	3	14	24	21.4286	58.3333	1.86065	0.0948579	0.98176
GO:0009101	glycoprotein biosynthetic process	biological_process	3	14	22	21.4286	63.6364	1.86065	0.0948579	0.98176
GO:0008645	hexose transport	biological_process	3	14	33	21.4286	42.4242	1.86065	0.0948579	0.98176
GO:0007159	leukocyte cell-cell adhesion	biological_process	3	14	31	21.4286	45.1613	1.86065	0.0948579	0.98176
GO:0006071	glycerol metabolic process	biological_process	3	14	28	21.4286	50	1.86065	0.0948579	0.98176
GO:0005546	phosphatidylinositol-4,5-bisphosphate binding	molecular_function	3	14	23	21.4286	60.8696	1.86065	0.0948579	0.98176
GO:0001659	temperature homeostasis	biological_process	3	14	27	21.4286	51.8519	1.86065	0.0948579	0.98176
GO:0007605	sensory perception of sound	biological_process	9	63	107	14.2857	58.8785	1.85725	0.0947381	0.98176
GO:0001764	neuron migration	biological_process	9	63	93	14.2857	67.7419	1.85725	0.0947381	0.98176
GO:0009582	detection of abiotic stimulus	biological_process	6	37	69	16.2162	53.6232	1.8557	0.0701144	0.863358
GO:0000977	RNA polymerase II regulatory region sequence-specific DNA binding	molecular_function	6	37	66	16.2162	56.0606	1.8557	0.0701144	0.863358
GO:0072527	pyrimidine-containing compound metabolic process	biological_process	5	29	49	17.2414	59.1837	1.84631	0.0763888	0.863358
GO:0060688	regulation of morphogenesis of a branching structure	biological_process	5	29	52	17.2414	55.7692	1.84631	0.0763888	0.863358
GO:0043588	skin development	biological_process	5	29	45	17.2414	64.4444	1.84631	0.0763888	0.863358
GO:0006096	glycolysis	biological_process	5	29	75	17.2414	38.6667	1.84631	0.0763888	0.863358
GO:0005578	proteinaceous extracellular matrix	cellular_component	15	120	267	12.5	44.9438	1.84435	0.0861507	0.91918
GO:0006875	cellular metal ion homeostasis	biological_process	17	140	276	12.1429	50.7246	1.83712	0.0810165	0.872412
GO:0030234	enzyme regulator activity	molecular_function	51	504	934	10.119	53.9615	1.83299	0.0749244	0.863358
GO:0043069	negative regulation of programmed cell death	biological_process	34	318	552	10.6918	57.6087	1.82429	0.0728358	0.863358
GO:0005829	cytosol	cellular_component	61	617	999	9.88655	61.7618	1.82077	0.0760778	0.863358
GO:0016202	regulation of striated muscle tissue development	biological_process	8	55	93	14.5455	59.1398	1.80589	0.0785761	0.863358
GO:0043524	negative regulation of neuron apoptosis	biological_process	9	64	96	14.0625	66.6667	1.80587	0.0976169	1
GO:0000904	cell morphogenesis involved in differentiation	biological_process	9	64	108	14.0625	59.2593	1.80587	0.0976169	1
GO:0008104	protein localization	biological_process	17	141	245	12.0567	57.551	1.80572	0.0825944	0.887161
GO:0016310	phosphorylation	biological_process	55	551	1013	9.98185	54.3929	1.79916	0.0742179	0.863358
GO:0009888	tissue development	biological_process	27	245	503	11.0204	48.7078	1.78712	0.0923709	0.975772
GO:0017171	serine hydrolase activity	molecular_function	11	83	236	13.253	35.1695	1.78517	0.097917	1
GO:0035258	steroid hormone receptor binding	molecular_function	6	38	52	15.7895	73.0769	1.78338	0.120225	1
GO:0032507	maintenance of protein location in cell	biological_process	6	38	63	15.7895	60.3175	1.78338	0.120225	1
GO:0002573	myeloid leukocyte differentiation	biological_process	6	38	67	15.7895	56.7164	1.78338	0.120225	1
GO:0090109	regulation of cell-substrate junction assembly	biological_process	2	8	15	25	53.3333	1.77918	0.128886	1
GO:0090103	cochlea morphogenesis	biological_process	2	8	20	25	40	1.77918	0.128886	1
GO:0060992	response to fungicide	biological_process	2	8	10	25	80	1.77918	0.128886	1
GO:0060600	dichotomous subdivision of an epithelial terminal unit	biological_process	2	8	13	25	61.5385	1.77918	0.128886	1
GO:0060045	positive regulation of cardiac muscle cell proliferation	biological_process	2	8	17	25	47.0588	1.77918	0.128886	1
GO:0060004	reflex	biological_process	2	8	11	25	72.7273	1.77918	0.128886	1
GO:0055094	response to lipoprotein stimulus	biological_process	2	8	10	25	80	1.77918	0.128886	1
GO:0051893	regulation of focal adhesion assembly	biological_process	2	8	15	25	53.3333	1.77918	0.128886	1
GO:0047555	3',5'-cyclic-GMP phosphodiesterase activity	molecular_function	2	8	13	25	61.5385	1.77918	0.128886	1
GO:0046457	prostanoid biosynthetic process	biological_process	2	8	15	25	53.3333	1.77918	0.128886	1
GO:0045663	positive regulation of myoblast differentiation	biological_process	2	8	11	25	72.7273	1.77918	0.128886	1
GO:0045652	regulation of megakaryocyte differentiation	biological_process	2	8	23	25	34.7826	1.77918	0.128886	1
GO:0045295	gamma-catenin binding	molecular_function	2	8	12	25	66.6667	1.77918	0.128886	1
GO:0045214	sarcomere organization	biological_process	2	8	20	25	40	1.77918	0.128886	1
GO:0045187	regulation of circadian sleep/wake cycle, sleep	biological_process	2	8	18	25	44.4444	1.77918	0.128886	1
GO:0044319	wound healing, spreading of cells	biological_process	2	8	11	25	72.7273	1.77918	0.128886	1
GO:0044224	juxtaparanode region of axon	cellular_component	2	8	8	25	100	1.77918	0.128886	1
GO:0043616	keratinocyte proliferation	biological_process	2	8	14	25	57.1429	1.77918	0.128886	1
GO:0043092	L-amino acid import	biological_process	2	8	10	25	80	1.77918	0.128886	1
GO:0042749	regulation of circadian sleep/wake cycle	biological_process	2	8	18	25	44.4444	1.77918	0.128886	1
GO:0040023	establishment of nucleus localization	biological_process	2	8	11	25	72.7273	1.77918	0.128886	1
GO:0035313	wound healing, spreading of epidermal cells	biological_process	2	8	10	25	80	1.77918	0.128886	1
GO:0033233	regulation of protein sumoylation	biological_process	2	8	11	25	72.7273	1.77918	0.128886	1
GO:0015301	anion	molecular_function	2	8	18	25	44.4444	1.77918	0.128886	1
GO:0010623	developmental programmed cell death	biological_process	2	8	14	25	57.1429	1.77918	0.128886	1
GO:0008093	cytoskeletal adaptor activity	molecular_function	2	8	16	25	50	1.77918	0.128886	1
GO:0007164	establishment of tissue polarity	biological_process	2	8	14	25	57.1429	1.77918	0.128886	1
GO:0006734	NADH metabolic process	biological_process	2	8	11	25	72.7273	1.77918	0.128886	1
GO:0006024	glycosaminoglycan biosynthetic process	biological_process	2	8	23	25	34.7826	1.77918	0.128886	1
GO:0005248	voltage-gated sodium channel activity	molecular_function	2	8	14	25	57.1429	1.77918	0.128886	1
GO:0001967	suckling behavior	biological_process	2	8	13	25	61.5385	1.77918	0.128886	1
GO:0001963	synaptic transmission, dopaminergic	biological_process	2	8	13	25	61.5385	1.77918	0.128886	1
GO:0001516	prostaglandin biosynthetic process	biological_process	2	8	15	25	53.3333	1.77918	0.128886	1
GO:0000421	autophagic vacuole membrane	cellular_component	2	8	11	25	72.7273	1.77918	0.128886	1
GO:0072503	cellular divalent inorganic cation homeostasis	biological_process	15	122	237	12.2951	51.4768	1.77573	0.089566	0.947709
GO:0055074	calcium ion homeostasis	biological_process	15	122	233	12.2951	52.3605	1.77573	0.089566	0.947709
GO:0006605	protein targeting	biological_process	15	122	190	12.2951	64.2105	1.77573	0.089566	0.947709
GO:0021885	forebrain cell migration	biological_process	4	22	36	18.1818	61.1111	1.77055	0.0928409	0.975899
GO:0010579	positive regulation of adenylate cyclase activity by G-protein signaling pathway	biological_process	4	22	42	18.1818	52.381	1.77055	0.0928409	0.975899
GO:0010578	regulation of adenylate cyclase activity involved in G-protein signaling pathway	biological_process	4	22	42	18.1818	52.381	1.77055	0.0928409	0.975899
GO:0007189	activation of adenylate cyclase activity by G-protein signaling pathway	biological_process	4	22	42	18.1818	52.381	1.77055	0.0928409	0.975899
GO:0002763	positive regulation of myeloid leukocyte differentiation	biological_process	4	22	36	18.1818	61.1111	1.77055	0.0928409	0.975899
GO:0072593	reactive oxygen species metabolic process	biological_process	5	30	64	16.6667	46.875	1.76156	0.0859488	0.917793
GO:0055001	muscle cell development	biological_process	5	30	48	16.6667	62.5	1.76156	0.0859488	0.917793
GO:0043467	regulation of generation of precursor metabolites and energy	biological_process	5	30	51	16.6667	58.8235	1.76156	0.0859488	0.917793
GO:0031645	negative regulation of neurological system process	biological_process	5	30	44	16.6667	68.1818	1.76156	0.0859488	0.917793
GO:0050905	neuromuscular process	biological_process	7	47	66	14.8936	71.2121	1.757	0.0968232	0.99737
GO:0008201	heparin binding	molecular_function	9	65	115	13.8462	56.5217	1.75539	0.100918	1
GO:0030135	coated vesicle	cellular_component	13	103	155	12.6214	66.4516	1.75283	0.0959198	0.990345
GO:0004721	phosphoprotein phosphatase activity	molecular_function	13	103	163	12.6214	63.1902	1.75283	0.0959198	0.990345
GO:0000902	cell morphogenesis	biological_process	13	103	177	12.6214	58.1921	1.75283	0.0959198	0.990345
GO:0048634	regulation of muscle organ development	biological_process	8	56	95	14.2857	58.9474	1.75034	0.0838635	0.899282
GO:0016055	Wnt receptor signaling pathway	biological_process	14	113	196	12.3894	57.6531	1.74536	0.111718	1
GO:0042592	homeostatic process	biological_process	47	466	874	10.0858	53.3181	1.73144	0.0944048	0.98176
GO:0009897	external side of plasma membrane	cellular_component	12	94	229	12.766	41.048	1.72569	0.0859438	0.917793
GO:0042325	regulation of phosphorylation	biological_process	44	433	741	10.1617	58.4345	1.7255	0.100741	1
GO:0044087	regulation of cellular component biogenesis	biological_process	19	164	291	11.5854	56.3574	1.72504	0.106776	1
GO:0009743	response to carbohydrate stimulus	biological_process	10	75	127	13.3333	59.0551	1.72199	0.0875228	0.928395
GO:0055021	regulation of cardiac muscle tissue growth	biological_process	3	15	28	20	53.5714	1.72162	0.111856	1
GO:0050661	NADP binding	molecular_function	3	15	74	20	20.2703	1.72162	0.111856	1
GO:0033017	sarcoplasmic reticulum membrane	cellular_component	3	15	23	20	65.2174	1.72162	0.111856	1
GO:0032839	dendrite cytoplasm	cellular_component	3	15	16	20	93.75	1.72162	0.111856	1
GO:0015749	monosaccharide transport	biological_process	3	15	34	20	44.1176	1.72162	0.111856	1
GO:0009262	deoxyribonucleotide metabolic process	biological_process	3	15	27	20	55.5556	1.72162	0.111856	1
GO:0007622	rhythmic behavior	biological_process	3	15	36	20	41.6667	1.72162	0.111856	1
GO:0007498	mesoderm development	biological_process	3	15	37	20	40.5405	1.72162	0.111856	1
GO:0006942	regulation of striated muscle contraction	biological_process	3	15	28	20	53.5714	1.72162	0.111856	1
GO:0006939	smooth muscle contraction	biological_process	3	15	37	20	40.5405	1.72162	0.111856	1
GO:0006029	proteoglycan metabolic process	biological_process	3	15	25	20	60	1.72162	0.111856	1
GO:0004629	phospholipase C activity	molecular_function	3	15	25	20	60	1.72162	0.111856	1
GO:0033036	macromolecule localization	biological_process	18	154	268	11.6883	57.4627	1.71825	0.0968343	0.99737
GO:0048839	inner ear development	biological_process	6	39	60	15.3846	65	1.71324	0.125121	1
GO:0045598	regulation of fat cell differentiation	biological_process	6	39	55	15.3846	70.9091	1.71324	0.125121	1
GO:0050770	regulation of axonogenesis	biological_process	9	66	96	13.6364	68.75	1.70578	0.104633	1
GO:0030336	negative regulation of cell migration	biological_process	9	66	98	13.6364	67.3469	1.70578	0.104633	1
GO:0042981	regulation of apoptosis	biological_process	58	592	1061	9.7973	55.7964	1.69791	0.0986955	1
GO:0030900	forebrain development	biological_process	7	48	77	14.5833	62.3377	1.69611	0.102485	1
GO:0010941	regulation of cell death	biological_process	60	615	1104	9.7561	55.7065	1.69387	0.104697	1
GO:0015711	organic anion transport	biological_process	5	31	60	16.129	51.6667	1.68007	0.0961036	0.991442
GO:0007507	heart development	biological_process	13	105	192	12.381	54.6875	1.67848	0.100984	1
GO:0048513	organ development	biological_process	52	526	979	9.88593	53.7283	1.67158	0.0970693	0.998986
GO:0055038	recycling endosome membrane	cellular_component	4	23	28	17.3913	82.1429	1.67029	0.105654	1
GO:0050771	negative regulation of axonogenesis	biological_process	4	23	31	17.3913	74.1935	1.67029	0.105654	1
GO:0042923	neuropeptide binding	molecular_function	4	23	45	17.3913	51.1111	1.67029	0.105654	1
GO:0030183	B cell differentiation	biological_process	4	23	46	17.3913	50	1.67029	0.105654	1
GO:0015807	L-amino acid transport	biological_process	4	23	32	17.3913	71.875	1.67029	0.105654	1
GO:0000122	negative regulation of transcription from RNA polymerase II promoter	biological_process	28	261	506	10.728	51.581	1.66922	0.103443	1
GO:0005624	membrane fraction	cellular_component	53	538	883	9.8513	60.9287	1.66115	0.100476	1
GO:2000146	negative regulation of cell motility	biological_process	9	67	100	13.4328	67	1.65701	0.108755	1
GO:0050795	regulation of behavior	biological_process	9	67	131	13.4328	51.145	1.65701	0.108755	1
GO:0045597	positive regulation of cell differentiation	biological_process	27	251	451	10.757	55.6541	1.6532	0.0984169	1
GO:0005488	binding	molecular_function	556	6745	13978	8.24314	48.2544	1.64715	0.10706	1
GO:0043244	regulation of protein complex disassembly	biological_process	6	40	57	15	70.1754	1.64516	0.130751	1
GO:0019717	synaptosome	cellular_component	13	106	149	12.2642	71.1409	1.64188	0.103905	1
GO:0045596	negative regulation of cell differentiation	biological_process	23	209	387	11.0048	54.0052	1.63879	0.118951	1
GO:0044432	endoplasmic reticulum part	cellular_component	39	383	670	10.1828	57.1642	1.6337	0.10167	1
GO:0030427	site of polarized growth	cellular_component	10	77	97	12.987	79.3814	1.63231	0.132786	1
GO:0030426	growth cone	cellular_component	10	77	97	12.987	79.3814	1.63231	0.132786	1
GO:0055065	metal ion homeostasis	biological_process	17	147	288	11.5646	51.0417	1.62226	0.121881	1
GO:2000678	negative regulation of transcription regulatory region DNA binding	biological_process	1	3	7	33.3333	42.8571	1.62222	0.22058	1
GO:2000343	positive regulation of chemokine (C-X-C motif) ligand 2 production	biological_process	1	3	5	33.3333	60	1.62222	0.22058	1
GO:2000109	regulation of macrophage apoptosis	biological_process	1	3	5	33.3333	60	1.62222	0.22058	1
GO:2000052	positive regulation of non-canonical Wnt receptor signaling pathway	biological_process	1	3	4	33.3333	75	1.62222	0.22058	1
GO:2000041	negative regulation of planar cell polarity pathway involved in axis elongation	biological_process	1	3	3	33.3333	100	1.62222	0.22058	1
GO:2000040	regulation of planar cell polarity pathway involved in axis elongation	biological_process	1	3	3	33.3333	100	1.62222	0.22058	1
GO:0097067	cellular response to thyroid hormone stimulus	biological_process	1	3	5	33.3333	60	1.62222	0.22058	1
GO:0097066	response to thyroid hormone stimulus	biological_process	1	3	5	33.3333	60	1.62222	0.22058	1
GO:0090330	regulation of platelet aggregation	biological_process	1	3	6	33.3333	50	1.62222	0.22058	1
GO:0090244	Wnt receptor signaling pathway involved in somitogenesis	biological_process	1	3	6	33.3333	50	1.62222	0.22058	1
GO:0090191	negative regulation of branching involved in ureteric bud morphogenesis	biological_process	1	3	3	33.3333	100	1.62222	0.22058	1
GO:0090140	regulation of mitochondrial fission	biological_process	1	3	3	33.3333	100	1.62222	0.22058	1
GO:0090073	positive regulation of protein homodimerization activity	biological_process	1	3	5	33.3333	60	1.62222	0.22058	1
GO:0090005	negative regulation of establishment of protein localization in plasma membrane	biological_process	1	3	4	33.3333	75	1.62222	0.22058	1
GO:0080130	L-phenylalanine	molecular_function	1	3	3	33.3333	100	1.62222	0.22058	1
GO:0072367	regulation of lipid transport by regulation of transcription from an RNA polymerase II promoter	biological_process	1	3	3	33.3333	100	1.62222	0.22058	1
GO:0072298	regulation of metanephric glomerulus development	biological_process	1	3	6	33.3333	50	1.62222	0.22058	1
GO:0072221	metanephric distal convoluted tubule development	biological_process	1	3	4	33.3333	75	1.62222	0.22058	1
GO:0072178	nephric duct morphogenesis	biological_process	1	3	6	33.3333	50	1.62222	0.22058	1
GO:0072126	positive regulation of glomerular mesangial cell proliferation	biological_process	1	3	3	33.3333	100	1.62222	0.22058	1
GO:0072107	positive regulation of ureteric bud formation	biological_process	1	3	4	33.3333	75	1.62222	0.22058	1
GO:0072106	regulation of ureteric bud formation	biological_process	1	3	4	33.3333	75	1.62222	0.22058	1
GO:0072080	nephron tubule development	biological_process	1	3	10	33.3333	30	1.62222	0.22058	1
GO:0072025	distal convoluted tubule development	biological_process	1	3	4	33.3333	75	1.62222	0.22058	1
GO:0072012	glomerulus vasculature development	biological_process	1	3	4	33.3333	75	1.62222	0.22058	1
GO:0072009	nephron epithelium development	biological_process	1	3	10	33.3333	30	1.62222	0.22058	1
GO:0071875	adrenergic receptor signaling pathway	biological_process	1	3	9	33.3333	33.3333	1.62222	0.22058	1
GO:0071786	endoplasmic reticulum tubular network organization	biological_process	1	3	3	33.3333	100	1.62222	0.22058	1
GO:0071664	catenin-TCF7L2 complex	cellular_component	1	3	3	33.3333	100	1.62222	0.22058	1
GO:0071635	negative regulation of transforming growth factor-beta production	biological_process	1	3	4	33.3333	75	1.62222	0.22058	1
GO:0071504	cellular response to heparin	biological_process	1	3	4	33.3333	75	1.62222	0.22058	1
GO:0071503	response to heparin	biological_process	1	3	5	33.3333	60	1.62222	0.22058	1
GO:0071374	cellular response to parathyroid hormone stimulus	biological_process	1	3	5	33.3333	60	1.62222	0.22058	1
GO:0071361	cellular response to ethanol	biological_process	1	3	7	33.3333	42.8571	1.62222	0.22058	1
GO:0071107	response to parathyroid hormone stimulus	biological_process	1	3	7	33.3333	42.8571	1.62222	0.22058	1
GO:0070668	positive regulation of mast cell proliferation	biological_process	1	3	4	33.3333	75	1.62222	0.22058	1
GO:0070666	regulation of mast cell proliferation	biological_process	1	3	4	33.3333	75	1.62222	0.22058	1
GO:0070572	positive regulation of neuron projection regeneration	biological_process	1	3	6	33.3333	50	1.62222	0.22058	1
GO:0070546	L-phenylalanine aminotransferase activity	molecular_function	1	3	4	33.3333	75	1.62222	0.22058	1
GO:0070344	regulation of fat cell proliferation	biological_process	1	3	5	33.3333	60	1.62222	0.22058	1
GO:0070326	very-low-density lipoprotein particle receptor binding	molecular_function	1	3	3	33.3333	100	1.62222	0.22058	1
GO:0070290	NAPE-specific phospholipase D activity	molecular_function	1	3	3	33.3333	100	1.62222	0.22058	1
GO:0070170	regulation of tooth mineralization	biological_process	1	3	5	33.3333	60	1.62222	0.22058	1
GO:0061316	canonical Wnt receptor signaling pathway involved in heart development	biological_process	1	3	4	33.3333	75	1.62222	0.22058	1
GO:0061154	endothelial tube morphogenesis	biological_process	1	3	3	33.3333	100	1.62222	0.22058	1
GO:0061153	trachea gland development	biological_process	1	3	3	33.3333	100	1.62222	0.22058	1
GO:0061081	positive regulation of myeloid leukocyte cytokine production involved in immune response	biological_process	1	3	8	33.3333	37.5	1.62222	0.22058	1
GO:0061056	sclerotome development	biological_process	1	3	4	33.3333	75	1.62222	0.22058	1
GO:0061032	visceral serous pericardium development	biological_process	1	3	9	33.3333	33.3333	1.62222	0.22058	1
GO:0060762	regulation of branching involved in mammary gland duct morphogenesis	biological_process	1	3	5	33.3333	60	1.62222	0.22058	1
GO:0060509	Type I pneumocyte differentiation	biological_process	1	3	3	33.3333	100	1.62222	0.22058	1
GO:0060324	face development	biological_process	1	3	8	33.3333	37.5	1.62222	0.22058	1
GO:0060158	activation of phospholipase C activity by dopamine receptor signaling pathway	biological_process	1	3	7	33.3333	42.8571	1.62222	0.22058	1
GO:0060056	mammary gland involution	biological_process	1	3	10	33.3333	30	1.62222	0.22058	1
GO:0055077	gap junction hemi-channel activity	molecular_function	1	3	3	33.3333	100	1.62222	0.22058	1
GO:0051964	negative regulation of synaptogenesis	biological_process	1	3	3	33.3333	100	1.62222	0.22058	1
GO:0051961	negative regulation of nervous system development	biological_process	1	3	4	33.3333	75	1.62222	0.22058	1
GO:0051935	glutamate uptake involved in synaptic transmission	biological_process	1	3	3	33.3333	100	1.62222	0.22058	1
GO:0051933	amino acid uptake involved in synaptic transmission	biological_process	1	3	3	33.3333	100	1.62222	0.22058	1
GO:0051932	synaptic transmission, GABAergic	biological_process	1	3	4	33.3333	75	1.62222	0.22058	1
GO:0051835	positive regulation of synapse structural plasticity	biological_process	1	3	3	33.3333	100	1.62222	0.22058	1
GO:0051608	histamine transport	biological_process	1	3	12	33.3333	25	1.62222	0.22058	1
GO:0051546	keratinocyte migration	biological_process	1	3	4	33.3333	75	1.62222	0.22058	1
GO:0051503	adenine nucleotide transport	biological_process	1	3	3	33.3333	100	1.62222	0.22058	1
GO:0051450	myoblast proliferation	biological_process	1	3	4	33.3333	75	1.62222	0.22058	1
GO:0051393	alpha-actinin binding	molecular_function	1	3	12	33.3333	25	1.62222	0.22058	1
GO:0051196	regulation of coenzyme metabolic process	biological_process	1	3	4	33.3333	75	1.62222	0.22058	1
GO:0051193	regulation of cofactor metabolic process	biological_process	1	3	4	33.3333	75	1.62222	0.22058	1
GO:0051156	glucose 6-phosphate metabolic process	biological_process	1	3	6	33.3333	50	1.62222	0.22058	1
GO:0051088	PMA-inducible membrane protein ectodomain proteolysis	biological_process	1	3	3	33.3333	100	1.62222	0.22058	1
GO:0050932	regulation of pigment cell differentiation	biological_process	1	3	6	33.3333	50	1.62222	0.22058	1
GO:0050891	multicellular organismal water homeostasis	biological_process	1	3	6	33.3333	50	1.62222	0.22058	1
GO:0050774	negative regulation of dendrite morphogenesis	biological_process	1	3	4	33.3333	75	1.62222	0.22058	1
GO:0050694	galactose 3-O-sulfotransferase activity	molecular_function	1	3	7	33.3333	42.8571	1.62222	0.22058	1
GO:0050544	arachidonic acid binding	molecular_function	1	3	5	33.3333	60	1.62222	0.22058	1
GO:0050543	icosatetraenoic acid binding	molecular_function	1	3	6	33.3333	50	1.62222	0.22058	1
GO:0050542	icosanoid binding	molecular_function	1	3	6	33.3333	50	1.62222	0.22058	1
GO:0048681	negative regulation of axon regeneration	biological_process	1	3	5	33.3333	60	1.62222	0.22058	1
GO:0048680	positive regulation of axon regeneration	biological_process	1	3	6	33.3333	50	1.62222	0.22058	1
GO:0048087	positive regulation of developmental pigmentation	biological_process	1	3	5	33.3333	60	1.62222	0.22058	1
GO:0048014	Tie receptor signaling pathway	biological_process	1	3	4	33.3333	75	1.62222	0.22058	1
GO:0047760	butyrate-CoA ligase activity	molecular_function	1	3	6	33.3333	50	1.62222	0.22058	1
GO:0046935	1-phosphatidylinositol-3-kinase regulator activity	molecular_function	1	3	3	33.3333	100	1.62222	0.22058	1
GO:0046934	phosphatidylinositol-4,5-bisphosphate 3-kinase activity	molecular_function	1	3	4	33.3333	75	1.62222	0.22058	1
GO:0046549	retinal cone cell development	biological_process	1	3	7	33.3333	42.8571	1.62222	0.22058	1
GO:0046546	development of primary male sexual characteristics	biological_process	1	3	3	33.3333	100	1.62222	0.22058	1
GO:0046174	polyol catabolic process	biological_process	1	3	6	33.3333	50	1.62222	0.22058	1
GO:0046078	dUMP metabolic process	biological_process	1	3	3	33.3333	100	1.62222	0.22058	1
GO:0046072	dTDP metabolic process	biological_process	1	3	3	33.3333	100	1.62222	0.22058	1
GO:0045989	positive regulation of striated muscle contraction	biological_process	1	3	8	33.3333	37.5	1.62222	0.22058	1
GO:0045634	regulation of melanocyte differentiation	biological_process	1	3	6	33.3333	50	1.62222	0.22058	1
GO:0045188	regulation of circadian sleep/wake cycle, non-REM sleep	biological_process	1	3	9	33.3333	33.3333	1.62222	0.22058	1
GO:0045134	uridine-diphosphatase activity	molecular_function	1	3	3	33.3333	100	1.62222	0.22058	1
GO:0045046	protein import into peroxisome membrane	biological_process	1	3	4	33.3333	75	1.62222	0.22058	1
GO:0044323	retinoic acid-responsive element binding	molecular_function	1	3	5	33.3333	60	1.62222	0.22058	1
GO:0044321	response to leptin stimulus	biological_process	1	3	6	33.3333	50	1.62222	0.22058	1
GO:0044294	dendritic growth cone	cellular_component	1	3	3	33.3333	100	1.62222	0.22058	1
GO:0043501	skeletal muscle adaptation	biological_process	1	3	7	33.3333	42.8571	1.62222	0.22058	1
GO:0043194	initial segment	cellular_component	1	3	4	33.3333	75	1.62222	0.22058	1
GO:0043125	ErbB-3 class receptor binding	molecular_function	1	3	4	33.3333	75	1.62222	0.22058	1
GO:0042731	PH domain binding	molecular_function	1	3	3	33.3333	100	1.62222	0.22058	1
GO:0042582	azurophil granule	cellular_component	1	3	5	33.3333	60	1.62222	0.22058	1
GO:0042581	specific granule	cellular_component	1	3	10	33.3333	30	1.62222	0.22058	1
GO:0042373	vitamin K metabolic process	biological_process	1	3	5	33.3333	60	1.62222	0.22058	1
GO:0035612	AP-2 adaptor complex binding	molecular_function	1	3	4	33.3333	75	1.62222	0.22058	1
GO:0035507	regulation of myosin-light-chain-phosphatase activity	biological_process	1	3	3	33.3333	100	1.62222	0.22058	1
GO:0035502	metanephric ureteric bud development	biological_process	1	3	3	33.3333	100	1.62222	0.22058	1
GO:0035385	Roundabout signaling pathway	biological_process	1	3	3	33.3333	100	1.62222	0.22058	1
GO:0035189	Rb-E2F complex	cellular_component	1	3	3	33.3333	100	1.62222	0.22058	1
GO:0034776	response to histamine	biological_process	1	3	5	33.3333	60	1.62222	0.22058	1
GO:0034454	microtubule anchoring at centrosome	biological_process	1	3	4	33.3333	75	1.62222	0.22058	1
GO:0034416	bisphosphoglycerate phosphatase activity	molecular_function	1	3	5	33.3333	60	1.62222	0.22058	1
GO:0034393	positive regulation of smooth muscle cell apoptosis	biological_process	1	3	6	33.3333	50	1.62222	0.22058	1
GO:0033634	positive regulation of cell-cell adhesion mediated by integrin	biological_process	1	3	5	33.3333	60	1.62222	0.22058	1
GO:0033632	regulation of cell-cell adhesion mediated by integrin	biological_process	1	3	8	33.3333	37.5	1.62222	0.22058	1
GO:0033601	positive regulation of mammary gland epithelial cell proliferation	biological_process	1	3	5	33.3333	60	1.62222	0.22058	1
GO:0033152	immunoglobulin V(D)J recombination	biological_process	1	3	5	33.3333	60	1.62222	0.22058	1
GO:0033034	positive regulation of myeloid cell apoptosis	biological_process	1	3	4	33.3333	75	1.62222	0.22058	1
GO:0033025	regulation of mast cell apoptosis	biological_process	1	3	5	33.3333	60	1.62222	0.22058	1
GO:0032983	kainate selective glutamate receptor complex	cellular_component	1	3	4	33.3333	75	1.62222	0.22058	1
GO:0032795	heterotrimeric G-protein binding	molecular_function	1	3	7	33.3333	42.8571	1.62222	0.22058	1
GO:0032713	negative regulation of interleukin-4 production	biological_process	1	3	5	33.3333	60	1.62222	0.22058	1
GO:0032591	dendritic spine membrane	cellular_component	1	3	5	33.3333	60	1.62222	0.22058	1
GO:0032506	cytokinetic process	biological_process	1	3	6	33.3333	50	1.62222	0.22058	1
GO:0032364	oxygen homeostasis	biological_process	1	3	5	33.3333	60	1.62222	0.22058	1
GO:0032236	positive regulation of calcium ion transport via store-operated calcium channel activity	biological_process	1	3	8	33.3333	37.5	1.62222	0.22058	1
GO:0032234	regulation of calcium ion transport via store-operated calcium channel activity	biological_process	1	3	9	33.3333	33.3333	1.62222	0.22058	1
GO:0032075	positive regulation of nuclease activity	biological_process	1	3	5	33.3333	60	1.62222	0.22058	1
GO:0032069	regulation of nuclease activity	biological_process	1	3	11	33.3333	27.2727	1.62222	0.22058	1
GO:0032059	bleb	cellular_component	1	3	5	33.3333	60	1.62222	0.22058	1
GO:0031694	alpha-2A adrenergic receptor binding	molecular_function	1	3	4	33.3333	75	1.62222	0.22058	1
GO:0031588	AMP-activated protein kinase complex	cellular_component	1	3	7	33.3333	42.8571	1.62222	0.22058	1
GO:0031432	titin binding	molecular_function	1	3	9	33.3333	33.3333	1.62222	0.22058	1
GO:0031430	M band	cellular_component	1	3	7	33.3333	42.8571	1.62222	0.22058	1
GO:0031077	post-embryonic camera-type eye development	biological_process	1	3	5	33.3333	60	1.62222	0.22058	1
GO:0030913	paranodal junction assembly	biological_process	1	3	5	33.3333	60	1.62222	0.22058	1
GO:0030575	nuclear body organization	biological_process	1	3	4	33.3333	75	1.62222	0.22058	1
GO:0030323	respiratory tube development	biological_process	1	3	4	33.3333	75	1.62222	0.22058	1
GO:0030306	ADP-ribosylation factor binding	molecular_function	1	3	6	33.3333	50	1.62222	0.22058	1
GO:0030284	estrogen receptor activity	molecular_function	1	3	5	33.3333	60	1.62222	0.22058	1
GO:0030262	apoptotic nuclear change	biological_process	1	3	7	33.3333	42.8571	1.62222	0.22058	1
GO:0030252	growth hormone secretion	biological_process	1	3	5	33.3333	60	1.62222	0.22058	1
GO:0030121	AP-1 adaptor complex	cellular_component	1	3	3	33.3333	100	1.62222	0.22058	1
GO:0021960	anterior commissure morphogenesis	biological_process	1	3	3	33.3333	100	1.62222	0.22058	1
GO:0021869	forebrain ventricular zone progenitor cell division	biological_process	1	3	7	33.3333	42.8571	1.62222	0.22058	1
GO:0021847	ventricular zone neuroblast division	biological_process	1	3	4	33.3333	75	1.62222	0.22058	1
GO:0021801	cerebral cortex radial glia guided migration	biological_process	1	3	3	33.3333	100	1.62222	0.22058	1
GO:0021797	forebrain anterior/posterior pattern formation	biological_process	1	3	6	33.3333	50	1.62222	0.22058	1
GO:0021695	cerebellar cortex development	biological_process	1	3	5	33.3333	60	1.62222	0.22058	1
GO:0021555	midbrain-hindbrain boundary morphogenesis	biological_process	1	3	4	33.3333	75	1.62222	0.22058	1
GO:0019987	negative regulation of anti-apoptosis	biological_process	1	3	7	33.3333	42.8571	1.62222	0.22058	1
GO:0019966	interleukin-1 binding	molecular_function	1	3	10	33.3333	30	1.62222	0.22058	1
GO:0019405	alditol catabolic process	biological_process	1	3	5	33.3333	60	1.62222	0.22058	1
GO:0019401	alditol biosynthetic process	biological_process	1	3	5	33.3333	60	1.62222	0.22058	1
GO:0019276	UDP-N-acetylgalactosamine metabolic process	biological_process	1	3	4	33.3333	75	1.62222	0.22058	1
GO:0019255	glucose 1-phosphate metabolic process	biological_process	1	3	5	33.3333	60	1.62222	0.22058	1
GO:0018106	peptidyl-histidine phosphorylation	biological_process	1	3	5	33.3333	60	1.62222	0.22058	1
GO:0017160	Ral GTPase binding	molecular_function	1	3	4	33.3333	75	1.62222	0.22058	1
GO:0016557	peroxisome membrane biogenesis	biological_process	1	3	4	33.3333	75	1.62222	0.22058	1
GO:0016300	tRNA (uracil) methyltransferase activity	molecular_function	1	3	5	33.3333	60	1.62222	0.22058	1
GO:0016281	eukaryotic translation initiation factor 4F complex	cellular_component	1	3	3	33.3333	100	1.62222	0.22058	1
GO:0016080	synaptic vesicle targeting	biological_process	1	3	4	33.3333	75	1.62222	0.22058	1
GO:0016075	rRNA catabolic process	biological_process	1	3	7	33.3333	42.8571	1.62222	0.22058	1
GO:0015872	dopamine transport	biological_process	1	3	8	33.3333	37.5	1.62222	0.22058	1
GO:0015868	purine ribonucleotide transport	biological_process	1	3	4	33.3333	75	1.62222	0.22058	1
GO:0015867	ATP transport	biological_process	1	3	3	33.3333	100	1.62222	0.22058	1
GO:0015865	purine nucleotide transport	biological_process	1	3	4	33.3333	75	1.62222	0.22058	1
GO:0015467	G-protein activated inward rectifier potassium channel activity	molecular_function	1	3	4	33.3333	75	1.62222	0.22058	1
GO:0010916	negative regulation of very-low-density lipoprotein particle clearance	biological_process	1	3	5	33.3333	60	1.62222	0.22058	1
GO:0010915	regulation of very-low-density lipoprotein particle clearance	biological_process	1	3	5	33.3333	60	1.62222	0.22058	1
GO:0010891	negative regulation of sequestering of triglyceride	biological_process	1	3	4	33.3333	75	1.62222	0.22058	1
GO:0010887	negative regulation of cholesterol storage	biological_process	1	3	4	33.3333	75	1.62222	0.22058	1
GO:0010739	positive regulation of protein kinase A signaling cascade	biological_process	1	3	5	33.3333	60	1.62222	0.22058	1
GO:0010692	regulation of alkaline phosphatase activity	biological_process	1	3	8	33.3333	37.5	1.62222	0.22058	1
GO:0010040	response to iron(II) ion	biological_process	1	3	3	33.3333	100	1.62222	0.22058	1
GO:0009331	glycerol-3-phosphate dehydrogenase complex	cellular_component	1	3	3	33.3333	100	1.62222	0.22058	1
GO:0009197	pyrimidine deoxyribonucleoside diphosphate biosynthetic process	biological_process	1	3	4	33.3333	75	1.62222	0.22058	1
GO:0009196	pyrimidine deoxyribonucleoside diphosphate metabolic process	biological_process	1	3	4	33.3333	75	1.62222	0.22058	1
GO:0009176	pyrimidine deoxyribonucleoside monophosphate metabolic process	biological_process	1	3	3	33.3333	100	1.62222	0.22058	1
GO:0009139	pyrimidine nucleoside diphosphate biosynthetic process	biological_process	1	3	4	33.3333	75	1.62222	0.22058	1
GO:0008475	procollagen-lysine 5-dioxygenase activity	molecular_function	1	3	3	33.3333	100	1.62222	0.22058	1
GO:0008330	protein tyrosine/threonine phosphatase activity	molecular_function	1	3	3	33.3333	100	1.62222	0.22058	1
GO:0008208	C21-steroid hormone catabolic process	biological_process	1	3	3	33.3333	100	1.62222	0.22058	1
GO:0008089	anterograde axon cargo transport	biological_process	1	3	4	33.3333	75	1.62222	0.22058	1
GO:0007638	mechanosensory behavior	biological_process	1	3	7	33.3333	42.8571	1.62222	0.22058	1
GO:0007567	parturition	biological_process	1	3	5	33.3333	60	1.62222	0.22058	1
GO:0007258	JUN phosphorylation	biological_process	1	3	4	33.3333	75	1.62222	0.22058	1
GO:0007171	activation of transmembrane receptor protein tyrosine kinase activity	biological_process	1	3	5	33.3333	60	1.62222	0.22058	1
GO:0007063	regulation of sister chromatid cohesion	biological_process	1	3	7	33.3333	42.8571	1.62222	0.22058	1
GO:0007008	outer mitochondrial membrane organization	biological_process	1	3	5	33.3333	60	1.62222	0.22058	1
GO:0006895	Golgi to endosome transport	biological_process	1	3	5	33.3333	60	1.62222	0.22058	1
GO:0006862	nucleotide transport	biological_process	1	3	4	33.3333	75	1.62222	0.22058	1
GO:0006685	sphingomyelin catabolic process	biological_process	1	3	5	33.3333	60	1.62222	0.22058	1
GO:0006538	glutamate catabolic process	biological_process	1	3	4	33.3333	75	1.62222	0.22058	1
GO:0006531	aspartate metabolic process	biological_process	1	3	4	33.3333	75	1.62222	0.22058	1
GO:0006518	peptide metabolic process	biological_process	1	3	5	33.3333	60	1.62222	0.22058	1
GO:0006467	protein thiol-disulfide exchange	biological_process	1	3	4	33.3333	75	1.62222	0.22058	1
GO:0006233	dTDP biosynthetic process	biological_process	1	3	3	33.3333	100	1.62222	0.22058	1
GO:0006106	fumarate metabolic process	biological_process	1	3	3	33.3333	100	1.62222	0.22058	1
GO:0006059	hexitol metabolic process	biological_process	1	3	3	33.3333	100	1.62222	0.22058	1
GO:0005945	6-phosphofructokinase complex	cellular_component	1	3	3	33.3333	100	1.62222	0.22058	1
GO:0005766	primary lysosome	cellular_component	1	3	5	33.3333	60	1.62222	0.22058	1
GO:0005513	detection of calcium ion	biological_process	1	3	6	33.3333	50	1.62222	0.22058	1
GO:0005499	vitamin D binding	molecular_function	1	3	6	33.3333	50	1.62222	0.22058	1
GO:0005436	sodium	molecular_function	1	3	5	33.3333	60	1.62222	0.22058	1
GO:0005280	hydrogen	molecular_function	1	3	3	33.3333	100	1.62222	0.22058	1
GO:0005173	stem cell factor receptor binding	molecular_function	1	3	4	33.3333	75	1.62222	0.22058	1
GO:0005166	neurotrophin p75 receptor binding	molecular_function	1	3	6	33.3333	50	1.62222	0.22058	1
GO:0005094	Rho GDP-dissociation inhibitor activity	molecular_function	1	3	3	33.3333	100	1.62222	0.22058	1
GO:0005078	MAP-kinase scaffold activity	molecular_function	1	3	3	33.3333	100	1.62222	0.22058	1
GO:0005007	fibroblast growth factor receptor activity	molecular_function	1	3	6	33.3333	50	1.62222	0.22058	1
GO:0004994	somatostatin receptor activity	molecular_function	1	3	5	33.3333	60	1.62222	0.22058	1
GO:0004952	dopamine receptor activity	molecular_function	1	3	5	33.3333	60	1.62222	0.22058	1
GO:0004935	adrenergic receptor activity	molecular_function	1	3	9	33.3333	33.3333	1.62222	0.22058	1
GO:0004897	ciliary neurotrophic factor receptor activity	molecular_function	1	3	4	33.3333	75	1.62222	0.22058	1
GO:0004798	thymidylate kinase activity	molecular_function	1	3	3	33.3333	100	1.62222	0.22058	1
GO:0004679	AMP-activated protein kinase activity	molecular_function	1	3	7	33.3333	42.8571	1.62222	0.22058	1
GO:0004634	phosphopyruvate hydratase activity	molecular_function	1	3	5	33.3333	60	1.62222	0.22058	1
GO:0004448	isocitrate dehydrogenase activity	molecular_function	1	3	5	33.3333	60	1.62222	0.22058	1
GO:0004367	glycerol-3-phosphate dehydrogenase [NAD+] activity	molecular_function	1	3	3	33.3333	100	1.62222	0.22058	1
GO:0004128	cytochrome-b5 reductase activity	molecular_function	1	3	6	33.3333	50	1.62222	0.22058	1
GO:0003872	6-phosphofructokinase activity	molecular_function	1	3	3	33.3333	100	1.62222	0.22058	1
GO:0003266	regulation of secondary heart field cardioblast proliferation	biological_process	1	3	7	33.3333	42.8571	1.62222	0.22058	1
GO:0003159	morphogenesis of an endothelium	biological_process	1	3	3	33.3333	100	1.62222	0.22058	1
GO:0003056	regulation of vascular smooth muscle contraction	biological_process	1	3	4	33.3333	75	1.62222	0.22058	1
GO:0002634	regulation of germinal center formation	biological_process	1	3	8	33.3333	37.5	1.62222	0.22058	1
GO:0002538	arachidonic acid metabolite production involved in inflammatory response	biological_process	1	3	6	33.3333	50	1.62222	0.22058	1
GO:0002523	leukocyte migration involved in inflammatory response	biological_process	1	3	7	33.3333	42.8571	1.62222	0.22058	1
GO:0002246	wound healing involved in inflammatory response	biological_process	1	3	3	33.3333	100	1.62222	0.22058	1
GO:0001821	histamine secretion	biological_process	1	3	10	33.3333	30	1.62222	0.22058	1
GO:0001733	galactosylceramide sulfotransferase activity	molecular_function	1	3	7	33.3333	42.8571	1.62222	0.22058	1
GO:0001665	alpha-N-acetylgalactosaminide alpha-2,6-sialyltransferase activity	molecular_function	1	3	3	33.3333	100	1.62222	0.22058	1
GO:0001660	fever generation	biological_process	1	3	5	33.3333	60	1.62222	0.22058	1
GO:0001609	adenosine receptor activity, G-protein coupled	molecular_function	1	3	7	33.3333	42.8571	1.62222	0.22058	1
GO:0001306	age-dependent response to oxidative stress	biological_process	1	3	3	33.3333	100	1.62222	0.22058	1
GO:0001099	basal RNA polymerase II transcription machinery binding	molecular_function	1	3	3	33.3333	100	1.62222	0.22058	1
GO:0001098	basal transcription machinery binding	molecular_function	1	3	3	33.3333	100	1.62222	0.22058	1
GO:0000983	RNA polymerase II core promoter sequence-specific DNA binding transcription factor activity	molecular_function	1	3	6	33.3333	50	1.62222	0.22058	1
GO:0000436	carbon catabolite activation of transcription from RNA polymerase II promoter	biological_process	1	3	4	33.3333	75	1.62222	0.22058	1
GO:0000429	carbon catabolite regulation of transcription from RNA polymerase II promoter	biological_process	1	3	4	33.3333	75	1.62222	0.22058	1
GO:0000268	peroxisome targeting sequence binding	molecular_function	1	3	4	33.3333	75	1.62222	0.22058	1
GO:0000015	phosphopyruvate hydratase complex	cellular_component	1	3	5	33.3333	60	1.62222	0.22058	1
GO:0033273	response to vitamin	biological_process	11	87	159	12.6437	54.717	1.61723	0.110219	1
GO:0043067	regulation of programmed cell death	biological_process	58	598	1071	9.699	55.8357	1.61525	0.117516	1
GO:0042802	identical protein binding	molecular_function	49	496	888	9.87903	55.8559	1.61452	0.105575	1
GO:0005996	monosaccharide metabolic process	biological_process	14	117	229	11.9658	51.0917	1.60611	0.119399	1
GO:0043242	negative regulation of protein complex disassembly	biological_process	5	32	44	15.625	72.7273	1.60159	0.106837	1
GO:0031594	neuromuscular junction	cellular_component	5	32	45	15.625	71.1111	1.60159	0.106837	1
GO:0008092	cytoskeletal protein binding	molecular_function	35	341	567	10.2639	60.1411	1.59421	0.125106	1
GO:0071322	cellular response to carbohydrate stimulus	biological_process	3	16	27	18.75	59.2593	1.59341	0.129909	1
GO:0061178	regulation of insulin secretion involved in cellular response to glucose stimulus	biological_process	3	16	25	18.75	64	1.59341	0.129909	1
GO:0060291	long-term synaptic potentiation	biological_process	3	16	19	18.75	84.2105	1.59341	0.129909	1
GO:0060048	cardiac muscle contraction	biological_process	3	16	25	18.75	64	1.59341	0.129909	1
GO:0045599	negative regulation of fat cell differentiation	biological_process	3	16	27	18.75	59.2593	1.59341	0.129909	1
GO:0033628	regulation of cell adhesion mediated by integrin	biological_process	3	16	35	18.75	45.7143	1.59341	0.129909	1
GO:0032855	positive regulation of Rac GTPase activity	biological_process	3	16	28	18.75	57.1429	1.59341	0.129909	1
GO:0032838	cell projection cytoplasm	cellular_component	3	16	17	18.75	94.1176	1.59341	0.129909	1
GO:0031397	negative regulation of protein ubiquitination	biological_process	3	16	29	18.75	55.1724	1.59341	0.129909	1
GO:0030551	cyclic nucleotide binding	molecular_function	3	16	29	18.75	55.1724	1.59341	0.129909	1
GO:0030282	bone mineralization	biological_process	3	16	26	18.75	61.5385	1.59341	0.129909	1
GO:0019200	carbohydrate kinase activity	molecular_function	3	16	20	18.75	80	1.59341	0.129909	1
GO:0016328	lateral plasma membrane	cellular_component	3	16	31	18.75	51.6129	1.59341	0.129909	1
GO:0007212	dopamine receptor signaling pathway	biological_process	3	16	24	18.75	66.6667	1.59341	0.129909	1
GO:0006626	protein targeting to mitochondrion	biological_process	3	16	28	18.75	57.1429	1.59341	0.129909	1
GO:0006220	pyrimidine nucleotide metabolic process	biological_process	3	16	33	18.75	48.4848	1.59341	0.129909	1
GO:0002673	regulation of acute inflammatory response	biological_process	3	16	47	18.75	34.0426	1.59341	0.129909	1
GO:0009893	positive regulation of metabolic process	biological_process	84	900	1610	9.33333	55.9006	1.59121	0.119232	1
GO:0071841	cellular component organization or biogenesis at cellular level	biological_process	119	1312	2336	9.07012	56.1644	1.59109	0.12238	1
GO:0000267	cell fraction	cellular_component	70	738	1213	9.48509	60.8409	1.5856	0.11841	1
GO:0072663	establishment of protein localization to peroxisome	biological_process	2	9	13	22.2222	69.2308	1.57938	0.157303	1
GO:0070229	negative regulation of lymphocyte apoptosis	biological_process	2	9	19	22.2222	47.3684	1.57938	0.157303	1
GO:0055117	regulation of cardiac muscle contraction	biological_process	2	9	17	22.2222	52.9412	1.57938	0.157303	1
GO:0048365	Rac GTPase binding	molecular_function	2	9	15	22.2222	60	1.57938	0.157303	1
GO:0048103	somatic stem cell division	biological_process	2	9	18	22.2222	50	1.57938	0.157303	1
GO:0045920	negative regulation of exocytosis	biological_process	2	9	14	22.2222	64.2857	1.57938	0.157303	1
GO:0045885	positive regulation of survival gene product expression	biological_process	2	9	14	22.2222	64.2857	1.57938	0.157303	1
GO:0044325	ion channel binding	molecular_function	2	9	11	22.2222	81.8182	1.57938	0.157303	1
GO:0043574	peroxisomal transport	biological_process	2	9	13	22.2222	69.2308	1.57938	0.157303	1
GO:0043516	regulation of DNA damage response, signal transduction by p53 class mediator	biological_process	2	9	21	22.2222	42.8571	1.57938	0.157303	1
GO:0043243	positive regulation of protein complex disassembly	biological_process	2	9	14	22.2222	64.2857	1.57938	0.157303	1
GO:0043090	amino acid import	biological_process	2	9	11	22.2222	81.8182	1.57938	0.157303	1
GO:0034109	homotypic cell-cell adhesion	biological_process	2	9	18	22.2222	50	1.57938	0.157303	1
GO:0032098	regulation of appetite	biological_process	2	9	14	22.2222	64.2857	1.57938	0.157303	1
GO:0032007	negative regulation of TOR signaling cascade	biological_process	2	9	13	22.2222	69.2308	1.57938	0.157303	1
GO:0031690	adrenergic receptor binding	molecular_function	2	9	14	22.2222	64.2857	1.57938	0.157303	1
GO:0031290	retinal ganglion cell axon guidance	biological_process	2	9	17	22.2222	52.9412	1.57938	0.157303	1
GO:0021879	forebrain neuron differentiation	biological_process	2	9	12	22.2222	75	1.57938	0.157303	1
GO:0021602	cranial nerve morphogenesis	biological_process	2	9	14	22.2222	64.2857	1.57938	0.157303	1
GO:0019201	nucleotide kinase activity	molecular_function	2	9	17	22.2222	52.9412	1.57938	0.157303	1
GO:0018195	peptidyl-arginine modification	biological_process	2	9	14	22.2222	64.2857	1.57938	0.157303	1
GO:0016646	oxidoreductase activity, acting on the CH-NH group of donors, NAD or NADP as acceptor	molecular_function	2	9	18	22.2222	50	1.57938	0.157303	1
GO:0016601	Rac protein signal transduction	biological_process	2	9	11	22.2222	81.8182	1.57938	0.157303	1
GO:0016079	synaptic vesicle exocytosis	biological_process	2	9	13	22.2222	69.2308	1.57938	0.157303	1
GO:0015464	acetylcholine receptor activity	molecular_function	2	9	15	22.2222	60	1.57938	0.157303	1
GO:0015269	calcium-activated potassium channel activity	molecular_function	2	9	16	22.2222	56.25	1.57938	0.157303	1
GO:0014065	phosphatidylinositol 3-kinase cascade	biological_process	2	9	12	22.2222	75	1.57938	0.157303	1
GO:0007216	metabotropic glutamate receptor signaling pathway	biological_process	2	9	14	22.2222	64.2857	1.57938	0.157303	1
GO:0006625	protein targeting to peroxisome	biological_process	2	9	13	22.2222	69.2308	1.57938	0.157303	1
GO:0006023	aminoglycan biosynthetic process	biological_process	2	9	25	22.2222	36	1.57938	0.157303	1
GO:0005942	phosphatidylinositol 3-kinase complex	cellular_component	2	9	13	22.2222	69.2308	1.57938	0.157303	1
GO:0004697	protein kinase C activity	molecular_function	2	9	17	22.2222	52.9412	1.57938	0.157303	1
GO:0004012	phospholipid-translocating ATPase activity	molecular_function	2	9	15	22.2222	60	1.57938	0.157303	1
GO:0001976	neurological system process involved in regulation of systemic arterial blood pressure	biological_process	2	9	13	22.2222	69.2308	1.57938	0.157303	1
GO:0001964	startle response	biological_process	2	9	14	22.2222	64.2857	1.57938	0.157303	1
GO:0072594	establishment of protein localization to organelle	biological_process	6	41	73	14.6341	56.1644	1.579	0.137086	1
GO:0070374	positive regulation of ERK1 and ERK2 cascade	biological_process	6	41	87	14.6341	47.1264	1.579	0.137086	1
GO:0051219	phosphoprotein binding	molecular_function	7	50	59	14	84.7458	1.57857	0.115315	1
GO:0030178	negative regulation of Wnt receptor signaling pathway	biological_process	7	50	93	14	53.7634	1.57857	0.115315	1
GO:0007631	feeding behavior	biological_process	7	50	84	14	59.5238	1.57857	0.115315	1
GO:0072507	divalent inorganic cation homeostasis	biological_process	15	128	246	11.7188	52.0325	1.57701	0.135586	1
GO:0032940	secretion by cell	biological_process	15	128	245	11.7188	52.2449	1.57701	0.135586	1
GO:0060759	regulation of response to cytokine stimulus	biological_process	4	24	41	16.6667	58.5366	1.57506	0.119218	1
GO:0050906	detection of stimulus involved in sensory perception	biological_process	4	24	77	16.6667	31.1688	1.57506	0.119218	1
GO:0046928	regulation of neurotransmitter secretion	biological_process	4	24	36	16.6667	66.6667	1.57506	0.119218	1
GO:0031228	intrinsic to Golgi membrane	cellular_component	4	24	39	16.6667	61.5385	1.57506	0.119218	1
GO:0030173	integral to Golgi membrane	cellular_component	4	24	39	16.6667	61.5385	1.57506	0.119218	1
GO:0001725	stress fiber	cellular_component	4	24	51	16.6667	47.0588	1.57506	0.119218	1
GO:0001558	regulation of cell growth	biological_process	18	159	252	11.3208	63.0952	1.57376	0.13676	1
GO:0001763	morphogenesis of a branching structure	biological_process	12	98	167	12.2449	58.6826	1.57093	0.129916	1
GO:0043549	regulation of kinase activity	biological_process	31	299	498	10.3679	60.0402	1.55671	0.12753	1
GO:0007169	transmembrane receptor protein tyrosine kinase signaling pathway	biological_process	16	139	243	11.5108	57.2016	1.55317	0.152174	1
GO:0043176	amine binding	molecular_function	10	79	149	12.6582	53.0201	1.54518	0.139096	1
GO:0006164	purine nucleotide biosynthetic process	biological_process	10	79	149	12.6582	53.0201	1.54518	0.139096	1
GO:0031975	envelope	cellular_component	8	60	106	13.3333	56.6038	1.5389	0.144043	1
GO:0031967	organelle envelope	cellular_component	8	60	106	13.3333	56.6038	1.5389	0.144043	1
GO:0042127	regulation of cell proliferation	biological_process	54	558	1020	9.67742	54.7059	1.53717	0.125283	1
GO:0005912	adherens junction	cellular_component	13	109	185	11.9266	58.9189	1.53433	0.150308	1
GO:0031513	nonmotile primary cilium	cellular_component	5	33	57	15.1515	57.8947	1.5259	0.182312	1
GO:0000082	G1/S transition of mitotic cell cycle	biological_process	5	33	48	15.1515	68.75	1.5259	0.182312	1
GO:0008134	transcription factor binding	molecular_function	26	246	396	10.5691	62.1212	1.52588	0.150254	1
GO:0030334	regulation of cell migration	biological_process	22	203	355	10.8374	57.1831	1.52551	0.147173	1
GO:0050808	synapse organization	biological_process	7	51	70	13.7255	72.8571	1.52178	0.122455	1
GO:0033189	response to vitamin A	biological_process	7	51	102	13.7255	50	1.52178	0.122455	1
GO:0045859	regulation of protein kinase activity	biological_process	29	279	468	10.3943	59.6154	1.51854	0.142943	1
GO:0051651	maintenance of location in cell	biological_process	6	42	72	14.2857	58.3333	1.51466	0.144097	1
GO:0009581	detection of external stimulus	biological_process	6	42	81	14.2857	51.8519	1.51466	0.144097	1
GO:0006937	regulation of muscle contraction	biological_process	6	42	83	14.2857	50.6024	1.51466	0.144097	1
GO:0006754	ATP biosynthetic process	biological_process	6	42	73	14.2857	57.5342	1.51466	0.144097	1
GO:0051347	positive regulation of transferase activity	biological_process	21	193	337	10.8808	57.27	1.50912	0.138186	1
GO:0051427	hormone receptor binding	molecular_function	10	80	116	12.5	68.9655	1.50253	0.142845	1
GO:0016740	transferase activity	molecular_function	70	745	1431	9.39597	52.0615	1.5	0.137877	1
GO:0006916	anti-apoptosis	biological_process	12	100	158	12	63.2911	1.49613	0.13633	1
GO:0042763	intracellular immature spore	cellular_component	23	215	388	10.6977	55.4124	1.49444	0.158831	1
GO:0040012	regulation of locomotion	biological_process	24	226	398	10.6195	56.7839	1.48919	0.135622	1
GO:0044449	contractile fiber part	cellular_component	8	61	127	13.1148	48.0315	1.48851	0.148909	1
GO:0031325	positive regulation of cellular metabolic process	biological_process	79	851	1508	9.2832	56.4324	1.4859	0.143203	1
GO:0000139	Golgi membrane	cellular_component	25	237	396	10.5485	59.8485	1.48509	0.143722	1
GO:0050764	regulation of phagocytosis	biological_process	4	25	46	16	54.3478	1.48439	0.133489	1
GO:0048514	blood vessel morphogenesis	biological_process	4	25	60	16	41.6667	1.48439	0.133489	1
GO:0046324	regulation of glucose import	biological_process	4	25	39	16	64.1026	1.48439	0.133489	1
GO:0045768	positive regulation of anti-apoptosis	biological_process	4	25	40	16	62.5	1.48439	0.133489	1
GO:0032432	actin filament bundle	cellular_component	4	25	54	16	46.2963	1.48439	0.133489	1
GO:0030705	cytoskeleton-dependent intracellular transport	biological_process	4	25	30	16	83.3333	1.48439	0.133489	1
GO:0010970	microtubule-based transport	biological_process	4	25	30	16	83.3333	1.48439	0.133489	1
GO:0016791	phosphatase activity	molecular_function	17	152	259	11.1842	58.6873	1.47544	0.171002	1
GO:0070228	regulation of lymphocyte apoptosis	biological_process	3	17	31	17.6471	54.8387	1.47448	0.148901	1
GO:0060420	regulation of heart growth	biological_process	3	17	32	17.6471	53.125	1.47448	0.148901	1
GO:0048871	multicellular organismal homeostasis	biological_process	3	17	34	17.6471	50	1.47448	0.148901	1
GO:0048640	negative regulation of developmental growth	biological_process	3	17	23	17.6471	73.913	1.47448	0.148901	1
GO:0048260	positive regulation of receptor-mediated endocytosis	biological_process	3	17	27	17.6471	62.963	1.47448	0.148901	1
GO:0045884	regulation of survival gene product expression	biological_process	3	17	23	17.6471	73.913	1.47448	0.148901	1
GO:0045600	positive regulation of fat cell differentiation	biological_process	3	17	21	17.6471	80.9524	1.47448	0.148901	1
GO:0045104	intermediate filament cytoskeleton organization	biological_process	3	17	28	17.6471	60.7143	1.47448	0.148901	1
GO:0045103	intermediate filament-based process	biological_process	3	17	29	17.6471	58.6207	1.47448	0.148901	1
GO:0042490	mechanoreceptor differentiation	biological_process	3	17	28	17.6471	60.7143	1.47448	0.148901	1
GO:0031114	regulation of microtubule depolymerization	biological_process	3	17	21	17.6471	80.9524	1.47448	0.148901	1
GO:0009593	detection of chemical stimulus	biological_process	3	17	65	17.6471	26.1538	1.47448	0.148901	1
GO:0008373	sialyltransferase activity	molecular_function	3	17	21	17.6471	80.9524	1.47448	0.148901	1
GO:0007026	negative regulation of microtubule depolymerization	biological_process	3	17	20	17.6471	85	1.47448	0.148901	1
GO:0005245	voltage-gated calcium channel activity	molecular_function	3	17	25	17.6471	68	1.47448	0.148901	1
GO:0001678	cellular glucose homeostasis	biological_process	3	17	30	17.6471	56.6667	1.47448	0.148901	1
GO:0005576	extracellular region	cellular_component	57	597	1613	9.54774	37.0118	1.4726	0.137836	1
GO:0035257	nuclear hormone receptor binding	molecular_function	9	71	94	12.6761	75.5319	1.46977	0.179903	1
GO:0016298	lipase activity	molecular_function	7	52	91	13.4615	57.1429	1.46623	0.189615	1
GO:0008016	regulation of heart contraction	biological_process	7	52	89	13.4615	58.427	1.46623	0.189615	1
GO:0044420	extracellular matrix part	cellular_component	10	81	181	12.3457	44.7514	1.46047	0.146976	1
GO:0010604	positive regulation of macromolecule metabolic process	biological_process	77	830	1478	9.27711	56.157	1.45877	0.15742	1
GO:0016772	transferase activity, transferring phosphorus-containing groups	molecular_function	52	541	1003	9.61183	53.9382	1.45396	0.163236	1
GO:0042562	hormone binding	molecular_function	5	34	67	14.7059	50.7463	1.45281	0.189006	1
GO:0009914	hormone transport	biological_process	5	34	68	14.7059	50	1.45281	0.189006	1
GO:0006986	response to unfolded protein	biological_process	5	34	53	14.7059	64.1509	1.45281	0.189006	1
GO:0060606	tube closure	biological_process	6	43	63	13.9535	68.254	1.45204	0.151752	1
GO:0001843	neural tube closure	biological_process	6	43	62	13.9535	69.3548	1.45204	0.151752	1
GO:0000982	RNA polymerase II core promoter proximal region sequence-specific DNA binding transcription factor activity	molecular_function	6	43	79	13.9535	54.4304	1.45204	0.151752	1
GO:0030029	actin filament-based process	biological_process	19	174	281	10.9195	61.9217	1.45041	0.155794	1
GO:0006357	regulation of transcription from RNA polymerase II promoter	biological_process	57	599	1081	9.51586	55.4117	1.44543	0.159334	1
GO:0051174	regulation of phosphorus metabolic process	biological_process	46	474	816	9.70464	58.0882	1.43226	0.162594	1
GO:0019220	regulation of phosphate metabolic process	biological_process	46	474	816	9.70464	58.0882	1.43226	0.162594	1
GO:0030182	neuron differentiation	biological_process	13	112	193	11.6071	58.0311	1.42995	0.158058	1
GO:0032268	regulation of cellular protein metabolic process	biological_process	58	612	1033	9.47712	59.2449	1.42551	0.163575	1
GO:0005626	insoluble fraction	cellular_component	54	566	929	9.54064	60.9257	1.42478	0.14965	1
GO:0043547	positive regulation of GTPase activity	biological_process	10	82	142	12.1951	57.7465	1.41897	0.151481	1
GO:0031589	cell-substrate adhesion	biological_process	7	53	99	13.2075	53.5354	1.41187	0.193952	1
GO:0030036	actin cytoskeleton organization	biological_process	18	165	265	10.9091	62.2642	1.40668	0.188874	1
GO:0043405	regulation of MAP kinase activity	biological_process	14	123	203	11.3821	60.5911	1.40668	0.176519	1
GO:0048518	positive regulation of biological process	biological_process	145	1644	2967	8.81995	55.4095	1.40656	0.15882	1
GO:2000178	negative regulation of neural precursor cell proliferation	biological_process	2	10	15	20	66.6667	1.40531	0.186727	1
GO:2000108	positive regulation of leukocyte apoptosis	biological_process	2	10	15	20	66.6667	1.40531	0.186727	1
GO:0090179	planar cell polarity pathway involved in neural tube closure	biological_process	2	10	13	20	76.9231	1.40531	0.186727	1
GO:0090178	regulation of establishment of planar polarity involved in neural tube closure	biological_process	2	10	13	20	76.9231	1.40531	0.186727	1
GO:0090162	establishment of epithelial cell polarity	biological_process	2	10	15	20	66.6667	1.40531	0.186727	1
GO:0070207	protein homotrimerization	biological_process	2	10	19	20	52.6316	1.40531	0.186727	1
GO:0070064	proline-rich region binding	molecular_function	2	10	15	20	66.6667	1.40531	0.186727	1
GO:0060026	convergent extension	biological_process	2	10	15	20	66.6667	1.40531	0.186727	1
GO:0051668	localization within membrane	biological_process	2	10	20	20	50	1.40531	0.186727	1
GO:0050974	detection of mechanical stimulus involved in sensory perception	biological_process	2	10	23	20	43.4783	1.40531	0.186727	1
GO:0050931	pigment cell differentiation	biological_process	2	10	23	20	43.4783	1.40531	0.186727	1
GO:0050922	negative regulation of chemotaxis	biological_process	2	10	16	20	62.5	1.40531	0.186727	1
GO:0048762	mesenchymal cell differentiation	biological_process	2	10	22	20	45.4545	1.40531	0.186727	1
GO:0048041	focal adhesion assembly	biological_process	2	10	17	20	58.8235	1.40531	0.186727	1
GO:0046209	nitric oxide metabolic process	biological_process	2	10	13	20	76.9231	1.40531	0.186727	1
GO:0045648	positive regulation of erythrocyte differentiation	biological_process	2	10	16	20	62.5	1.40531	0.186727	1
GO:0044298	cell body membrane	cellular_component	2	10	12	20	83.3333	1.40531	0.186727	1
GO:0043500	muscle adaptation	biological_process	2	10	15	20	66.6667	1.40531	0.186727	1
GO:0042474	middle ear morphogenesis	biological_process	2	10	23	20	43.4783	1.40531	0.186727	1
GO:0035259	glucocorticoid receptor binding	molecular_function	2	10	12	20	83.3333	1.40531	0.186727	1
GO:0035250	UDP-galactosyltransferase activity	molecular_function	2	10	21	20	47.619	1.40531	0.186727	1
GO:0032809	neuronal cell body membrane	cellular_component	2	10	11	20	90.9091	1.40531	0.186727	1
GO:0032413	negative regulation of ion transmembrane transporter activity	biological_process	2	10	16	20	62.5	1.40531	0.186727	1
GO:0022410	circadian sleep/wake cycle process	biological_process	2	10	20	20	50	1.40531	0.186727	1
GO:0017075	syntaxin-1 binding	molecular_function	2	10	14	20	71.4286	1.40531	0.186727	1
GO:0010470	regulation of gastrulation	biological_process	2	10	25	20	40	1.40531	0.186727	1
GO:0009067	aspartate family amino acid biosynthetic process	biological_process	2	10	20	20	50	1.40531	0.186727	1
GO:0007271	synaptic transmission, cholinergic	biological_process	2	10	14	20	71.4286	1.40531	0.186727	1
GO:0006487	protein N-linked glycosylation	biological_process	2	10	20	20	50	1.40531	0.186727	1
GO:0006333	chromatin assembly or disassembly	biological_process	2	10	23	20	43.4783	1.40531	0.186727	1
GO:0005916	fascia adherens	cellular_component	2	10	14	20	71.4286	1.40531	0.186727	1
GO:0002833	positive regulation of response to biotic stimulus	biological_process	2	10	14	20	71.4286	1.40531	0.186727	1
GO:0051173	positive regulation of nitrogen compound metabolic process	biological_process	60	637	1115	9.41915	57.13	1.40047	0.171464	1
GO:0019899	enzyme binding	molecular_function	60	637	1056	9.41915	60.322	1.40047	0.171464	1
GO:0043679	axon terminus	cellular_component	4	26	43	15.3846	60.4651	1.39785	0.148416	1
GO:0019751	polyol metabolic process	biological_process	4	26	43	15.3846	60.4651	1.39785	0.148416	1
GO:0017048	Rho GTPase binding	molecular_function	4	26	46	15.3846	56.5217	1.39785	0.148416	1
GO:0016529	sarcoplasmic reticulum	cellular_component	4	26	43	15.3846	60.4651	1.39785	0.148416	1
GO:0001047	core promoter binding	molecular_function	4	26	43	15.3846	60.4651	1.39785	0.148416	1
GO:0009968	negative regulation of signal transduction	biological_process	28	274	441	10.219	62.1315	1.39565	0.17282	1
GO:0051592	response to calcium ion	biological_process	6	44	85	13.6364	51.7647	1.39106	0.160022	1
GO:0007623	circadian rhythm	biological_process	6	44	90	13.6364	48.8889	1.39106	0.160022	1
GO:0002761	regulation of myeloid leukocyte differentiation	biological_process	6	44	75	13.6364	58.6667	1.39106	0.160022	1
GO:0032103	positive regulation of response to external stimulus	biological_process	8	63	130	12.6984	48.4615	1.39045	0.160094	1
GO:0010721	negative regulation of cell development	biological_process	8	63	104	12.6984	60.5769	1.39045	0.160094	1
GO:0008083	growth factor activity	molecular_function	8	63	145	12.6984	43.4483	1.39045	0.160094	1
GO:0051101	regulation of DNA binding	biological_process	5	35	71	14.2857	49.2958	1.38215	0.196623	1
GO:0051100	negative regulation of binding	biological_process	5	35	65	14.2857	53.8462	1.38215	0.196623	1
GO:0010001	glial cell differentiation	biological_process	5	35	53	14.2857	66.0377	1.38215	0.196623	1
GO:0007229	integrin-mediated signaling pathway	biological_process	5	35	72	14.2857	48.6111	1.38215	0.196623	1
GO:0030099	myeloid cell differentiation	biological_process	9	73	127	12.3288	57.4803	1.3805	0.186967	1
GO:2000145	regulation of cell motility	biological_process	22	209	368	10.5263	56.7935	1.38039	0.194121	1
GO:0046777	protein autophosphorylation	biological_process	10	83	156	12.0482	53.2051	1.37803	0.156351	1
GO:0072655	establishment of protein localization in mitochondrion	biological_process	3	18	33	16.6667	54.5455	1.36359	0.168714	1
GO:0055024	regulation of cardiac muscle tissue development	biological_process	3	18	33	16.6667	54.5455	1.36359	0.168714	1
GO:0051602	response to electrical stimulus	biological_process	3	18	33	16.6667	54.5455	1.36359	0.168714	1
GO:0046456	icosanoid biosynthetic process	biological_process	3	18	39	16.6667	46.1538	1.36359	0.168714	1
GO:0045687	positive regulation of glial cell differentiation	biological_process	3	18	25	16.6667	72	1.36359	0.168714	1
GO:0045668	negative regulation of osteoblast differentiation	biological_process	3	18	35	16.6667	51.4286	1.36359	0.168714	1
GO:0030901	midbrain development	biological_process	3	18	34	16.6667	52.9412	1.36359	0.168714	1
GO:0016757	transferase activity, transferring glycosyl groups	molecular_function	13	114	259	11.4035	44.0154	1.36204	0.164704	1
GO:0050768	negative regulation of neurogenesis	biological_process	7	54	87	12.963	62.069	1.35865	0.198933	1
GO:0008344	adult locomotory behavior	biological_process	7	54	76	12.963	71.0526	1.35865	0.198933	1
GO:0008283	cell proliferation	biological_process	23	221	374	10.4072	59.0909	1.35426	0.167521	1
GO:0014075	response to amine stimulus	biological_process	8	64	109	12.5	58.7156	1.34271	0.166381	1
GO:0003706	ligand-regulated transcription factor activity	molecular_function	435	5244	10305	8.29519	50.8879	1.3425	0.180665	1
GO:0072522	purine-containing compound biosynthetic process	biological_process	10	84	157	11.9048	53.5032	1.33762	0.218868	1
GO:0016758	transferase activity, transferring hexosyl groups	molecular_function	9	74	177	12.1622	41.8079	1.33686	0.191206	1
GO:0010628	positive regulation of gene expression	biological_process	55	584	1048	9.41781	55.7252	1.33548	0.179466	1
GO:0031982	vesicle	cellular_component	45	469	787	9.59488	59.5934	1.33413	0.188497	1
GO:0032270	positive regulation of cellular protein metabolic process	biological_process	25	244	414	10.2459	58.9372	1.33052	0.186613	1
[truncated: 10,799 more rows]

## Sheet: KEGG
GO-Elite ORA Results
File:
Table:
colors:
6/19/2014
Mus musculus
Pvalues = true
Calculation Summary:
758 EntrezGene source identifiers supplied in the input file:AllReggenelistsLayerPatternedentrez.txt
722 source identifiers meeting the filter linked to a Ensembl ID.
239 genes meeting the criterion linked to a term.
9711 source identifiers in this dataset.
9057 source identifiers linked to a Ensembl ID.
2955 Genes linked to a term.
The z score is based on an N of 2955 and a R of 239 distinct genes in all terms.
Gene-Set Name	Number Changed	Number Measured	Number in Gene-Set	Percent Changed	Percent Present	Z Score	FisherExactP	AdjustedP
Calcium signaling pathway:KEGG-mmu04020	25	97	178	25.7732	54.4944	6.49477	7.71491e-08	1.73586e-05
Glutamatergic synapse:KEGG-mmu04724	18	84	123	21.4286	68.2927	4.5488	8.55582e-05	0.0096253
Glycosaminoglycan biosynthesis - heparan sulfate:KEGG-mmu00534	3	5	6	60	83.3333	4.26031	0.0046227	0.0693405
Gastric acid secretion:KEGG-mmu04971	12	49	72	24.4898	68.0556	4.24562	0.000366988	0.024661
Long-term potentiation:KEGG-mmu04720	12	51	68	23.5294	75	4.07918	0.000545516	0.024661
MAPK signaling pathway:KEGG-mmu04010	26	163	265	15.9509	61.5094	3.78721	0.000548023	0.024661
Olfactory transduction:KEGG-mmu04740	6	19	990	31.5789	1.91919	3.76702	0.00290107	0.0577608
Axon guidance:KEGG-mmu04360	17	91	130	18.6813	70	3.76414	0.0011669	0.0437588
ECM-receptor interaction:KEGG-mmu04512	10	43	86	23.2558	50	3.67418	0.00174313	0.0490256
Salivary secretion:KEGG-mmu04970	11	51	76	21.5686	67.1053	3.5612	0.00199319	0.0498298
Oocyte meiosis:KEGG-mmu04114	13	65	110	20	59.0909	3.56116	0.00166053	0.0490256
Dilated cardiomyopathy:KEGG-mmu05414	11	53	90	20.7547	58.8889	3.41234	0.00275942	0.0577608
D-Glutamine and D-glutamate metabolism:KEGG-mmu00471	1	1	3	100	33.3333	3.37106	0.0808799	0.519942
Arrhythmogenic right ventricular cardiomyopathy (ARVC):KEGG-mmu05412	10	47	74	21.2766	63.5135	3.34233	0.00352857	0.0577608
Amoebiasis:KEGG-mmu05146	11	54	115	20.3704	46.9565	3.34045	0.00322315	0.0577608
Neuroactive ligand-receptor interaction:KEGG-mmu04080	21	138	278	15.2174	49.6403	3.14556	0.00359401	0.0577608
Hypertrophic cardiomyopathy (HCM):KEGG-mmu05410	9	43	84	20.9302	51.1905	3.11085	0.00624624	0.0826708
Melanogenesis:KEGG-mmu04916	12	65	99	18.4615	65.6566	3.10123	0.00498826	0.0701475
Glioma:KEGG-mmu05214	9	46	64	19.5652	71.875	2.87702	0.00985787	0.123223
Glycosphingolipid biosynthesis - lacto and neolacto series:KEGG-mmu00601	4	14	25	28.5714	56	2.8172	0.0218472	0.223438
Amyotrophic lateral sclerosis (ALS):KEGG-mmu05014	7	33	55	21.2121	60	2.78027	0.0142925	0.169254
Focal adhesion:KEGG-mmu04510	17	120	199	14.1667	60.3015	2.493	0.0240549	0.23532
Wnt signaling pathway:KEGG-mmu04310	14	94	151	14.8936	62.2517	2.45908	0.0202592	0.217063
Biotin metabolism:KEGG-mmu00780	1	2	2	50	100	2.17431	0.155243	0.766543
Neurotrophin signaling pathway:KEGG-mmu04722	13	92	128	14.1304	71.875	2.15921	0.0481833	0.387187
Glycosphingolipid biosynthesis - ganglio series:KEGG-mmu00604	3	12	15	25	80	2.15273	0.0665818	0.454191
Vascular smooth muscle contraction:KEGG-mmu04270	10	66	118	15.1515	55.9322	2.12823	0.0619187	0.454191
Cardiac muscle contraction:KEGG-mmu04260	8	51	78	15.6863	65.3846	2.00725	0.0625918	0.454191
Gap junction:KEGG-mmu04540	9	60	87	15	68.9655	1.9836	0.0552958	0.429019
Phosphatidylinositol signaling system:KEGG-mmu04070	8	52	77	15.3846	67.5325	1.9467	0.0666146	0.454191
GnRH signaling pathway:KEGG-mmu04912	8	53	97	15.0943	54.6392	1.88747	0.0710496	0.470181
Pancreatic secretion:KEGG-mmu04972	8	56	104	14.2857	53.8462	1.71712	0.129467	0.746467
Hematopoietic cell lineage:KEGG-mmu04640	6	39	84	15.3846	46.4286	1.68213	0.126595	0.746467
Progesterone-mediated oocyte maturation:KEGG-mmu04914	8	57	86	14.0351	66.2791	1.66262	0.132705	0.746467
Phenylalanine, tyrosine and tryptophan biosynthesis:KEGG-mmu00400	1	3	6	33.3333	50	1.60429	0.223613	0.894912
Butirosin and neomycin biosynthesis:KEGG-mmu00524	1	3	5	33.3333	60	1.60429	0.223613	0.894912
Phenylalanine metabolism:KEGG-mmu00360	2	9	19	22.2222	47.3684	1.55731	0.160961	0.766543
Glycosphingolipid biosynthesis - globo series:KEGG-mmu00603	2	9	15	22.2222	60	1.55731	0.160961	0.766543
Natural killer cell mediated cytotoxicity:KEGG-mmu04650	8	60	121	13.3333	49.5868	1.5053	0.145718	0.766543
Galactose metabolism:KEGG-mmu00052	3	17	28	17.6471	60.7143	1.44948	0.153367	0.766543
Huntington's disease:KEGG-mmu05016	13	112	180	11.6071	62.2222	1.39238	0.15842	0.766543
Adherens junction:KEGG-mmu04520	6	45	73	13.3333	61.6438	1.30027	0.173402	0.780307
Phototransduction:KEGG-mmu04744	2	11	29	18.1818	37.931	1.22994	0.221625	0.894912
Small cell lung cancer:KEGG-mmu05222	7	56	86	12.5	65.1163	1.22238	0.213711	0.894912
Glycolysis / Gluconeogenesis:KEGG-mmu00010	5	37	67	13.5135	55.2239	1.21786	0.218209	0.894912
Cell adhesion molecules (CAMs):KEGG-mmu04514	8	67	145	11.9403	46.2069	1.16966	0.252058	0.894912
Taste transduction:KEGG-mmu04742	3	20	60	15	33.3333	1.1374	0.216313	0.894912
Pathways in cancer:KEGG-mmu05200	20	197	322	10.1523	61.1801	1.09978	0.278136	0.952851
Non-small cell lung cancer:KEGG-mmu05223	5	39	54	12.8205	72.2222	1.09101	0.240126	0.894912
Melanoma:KEGG-mmu05218	5	39	71	12.8205	54.9296	1.09101	0.240126	0.894912
Leukocyte transendothelial migration:KEGG-mmu04670	7	59	118	11.8644	50	1.0745	0.327582	1
VEGF signaling pathway:KEGG-mmu04370	6	50	75	12	66.6667	1.02308	0.291625	0.964935
Parkinson's disease:KEGG-mmu05012	9	81	132	11.1111	61.3636	1.01171	0.299844	0.977752
Mucin type O-Glycan biosynthesis:KEGG-mmu00512	2	13	28	15.3846	46.4286	0.966878	0.283738	0.952851
Antigen processing and presentation:KEGG-mmu04612	4	32	76	12.5	42.1053	0.92023	0.323108	1
Aldosterone-regulated sodium reabsorption:KEGG-mmu04960	4	32	44	12.5	72.7273	0.92023	0.323108	1
Starch and sucrose metabolism:KEGG-mmu00500	3	23	49	13.0435	46.9388	0.874918	0.426171	1
Prion diseases:KEGG-mmu05020	3	23	35	13.0435	65.7143	0.874918	0.426171	1
Long-term depression:KEGG-mmu04730	5	43	70	11.6279	61.4286	0.857494	0.390569	1
Regulation of actin cytoskeleton:KEGG-mmu04810	12	118	212	10.1695	55.6604	0.846229	0.387675	1
Prostate cancer:KEGG-mmu05215	7	64	89	10.9375	71.9101	0.845153	0.355213	1
ErbB signaling pathway:KEGG-mmu04012	7	64	87	10.9375	73.5632	0.845153	0.355213	1
Primary bile acid biosynthesis:KEGG-mmu00120	1	6	15	16.6667	40	0.771361	0.397386	1
Purine metabolism:KEGG-mmu00230	9	88	169	10.2273	52.071	0.747128	0.426552	1
Intestinal immune network for IgA production:KEGG-mmu04672	2	15	45	13.3333	33.3333	0.74687	0.345394	1
Circadian rhythm - mammal:KEGG-mmu04710	2	15	22	13.3333	68.1818	0.74687	0.345394	1
Alzheimer's disease:KEGG-mmu05010	11	111	176	9.90991	63.0682	0.717506	0.475694	1
Osteoclast differentiation:KEGG-mmu04380	7	68	117	10.2941	58.1197	0.674934	0.496	1
Fc gamma R-mediated phagocytosis:KEGG-mmu04666	6	58	88	10.3448	65.9091	0.63656	0.466226	1
Endocrine and other factor-regulated calcium reabsorption:KEGG-mmu04961	4	37	56	10.8108	66.0714	0.611191	0.536764	1
Nicotinate and nicotinamide metabolism:KEGG-mmu00760	1	7	26	14.2857	26.9231	0.602028	0.446224	1
Toxoplasmosis:KEGG-mmu05145	7	70	126	10	55.5556	0.593699	0.505376	1
African trypanosomiasis:KEGG-mmu05143	2	17	33	11.7647	51.5152	0.557517	0.642689	1
Colorectal cancer:KEGG-mmu05210	5	49	64	10.2041	76.5625	0.547752	0.592216	1
Protein processing in endoplasmic reticulum:KEGG-mmu04141	11	117	162	9.40171	72.2222	0.531728	0.602004	1
Glycerolipid metabolism:KEGG-mmu00561	3	28	53	10.7143	52.8302	0.512048	0.490917	1
Fructose and mannose metabolism:KEGG-mmu00051	3	28	38	10.7143	73.6842	0.512048	0.490917	1
Amino sugar and nucleotide sugar metabolism:KEGG-mmu00520	3	28	50	10.7143	56	0.512048	0.490917	1
Type II diabetes mellitus:KEGG-mmu04930	3	29	50	10.3448	58	0.44788	0.505741	1
Arginine and proline metabolism:KEGG-mmu00330	3	29	56	10.3448	51.7857	0.44788	0.505741	1
Tight junction:KEGG-mmu04530	7	74	134	9.45946	55.2239	0.438158	0.663349	1
Tuberculosis:KEGG-mmu05152	8	86	176	9.30233	48.8636	0.419105	0.686031	1
Alanine, aspartate and glutamate metabolism:KEGG-mmu00250	2	19	32	10.5263	59.375	0.391012	0.662742	1
N-Glycan biosynthesis:KEGG-mmu00510	3	30	50	10	60	0.386	0.730679	1
One carbon pool by folate:KEGG-mmu00670	1	9	19	11.1111	47.3684	0.333089	0.53239	1
Homologous recombination:KEGG-mmu03440	1	9	27	11.1111	33.3333	0.333089	0.53239	1
Apoptosis:KEGG-mmu04210	5	54	86	9.25926	62.7907	0.318552	0.620591	1
Fc epsilon RI signaling pathway:KEGG-mmu04664	4	44	78	9.09091	56.4103	0.245794	0.778039	1
Tyrosine metabolism:KEGG-mmu00350	2	22	37	9.09091	59.4595	0.17315	0.696995	1
Protein digestion and absorption:KEGG-mmu04974	3	34	78	8.82353	43.5897	0.158191	0.752327	1
Chagas disease (American trypanosomiasis):KEGG-mmu05142	5	58	101	8.62069	57.4257	0.150253	0.807538	1
Proximal tubule bicarbonate reclamation:KEGG-mmu04964	1	11	20	9.09091	55	0.122206	0.605196	1
Thyroid cancer:KEGG-mmu05216	2	23	29	8.69565	79.3103	0.107287	0.708928	1
Malaria:KEGG-mmu05144	2	23	48	8.69565	47.9167	0.107287	0.708928	1
Carbohydrate digestion and absorption:KEGG-mmu04973	2	23	43	8.69565	53.4884	0.107287	0.708928	1
Acute myeloid leukemia:KEGG-mmu05221	4	48	57	8.33333	84.2105	0.062846	0.793343	1
Maturity onset diabetes of the young:KEGG-mmu04950	1	12	26	8.33333	46.1538	0.0312302	1	1
Viral myocarditis:KEGG-mmu05416	3	37	86	8.10811	43.0233	0.00451669	1	1
Bacterial invasion of epithelial cells:KEGG-mmu05100	4	50	69	8	72.4638	-0.0230105	1	1
Pentose and glucuronate interconversions:KEGG-mmu00040	1	13	31	7.69231	41.9355	-0.0524315	1	1
Collecting duct acid secretion:KEGG-mmu04966	1	13	27	7.69231	48.1481	-0.0524315	1	1
B cell receptor signaling pathway:KEGG-mmu04662	4	51	75	7.84314	68	-0.0646821	1	1
Bladder cancer:KEGG-mmu05219	2	26	42	7.69231	61.9048	-0.0743137	1	1
p53 signaling pathway:KEGG-mmu04115	3	39	68	7.69231	57.3529	-0.0912179	1	1
Nitrogen metabolism:KEGG-mmu00910	1	14	23	7.14286	60.8696	-0.129989	1	1
Endocytosis:KEGG-mmu04144	10	130	215	7.69231	60.4651	-0.169201	1	1
Endometrial cancer:KEGG-mmu05213	3	41	52	7.31707	78.8462	-0.182285	1	1
Bile secretion:KEGG-mmu04976	3	41	71	7.31707	57.7465	-0.182285	1	1
T cell receptor signaling pathway:KEGG-mmu04660	5	67	108	7.46269	62.037	-0.189857	1	1
Pyrimidine metabolism:KEGG-mmu00240	4	55	98	7.27273	56.1224	-0.223809	1	1
NOD-like receptor signaling pathway:KEGG-mmu04621	2	29	57	6.89655	50.8772	-0.236445	1	1
Chemokine signaling pathway:KEGG-mmu04062	9	121	186	7.43802	65.0538	-0.267723	1	1
Pentose phosphate pathway:KEGG-mmu00030	1	16	29	6.25	55.1724	-0.270334	1	1
Lysine biosynthesis:KEGG-mmu00300	0	1	3	0	33.3333	-0.296643	1	1
Lipoic acid metabolism:KEGG-mmu00785	0	1	3	0	33.3333	-0.296643	1	1
Cyanoamino acid metabolism:KEGG-mmu00460	0	1	6	0	16.6667	-0.296643	1	1
Measles:KEGG-mmu05162	5	71	135	7.04225	52.5926	-0.327078	1	1
Cysteine and methionine metabolism:KEGG-mmu00270	1	17	37	5.88235	45.9459	-0.33445	1	1
Basal cell carcinoma:KEGG-mmu05217	2	32	55	6.25	58.1818	-0.383356	1	1
Cell cycle:KEGG-mmu04110	5	73	123	6.84932	59.3496	-0.392979	0.830362	1
Sphingolipid metabolism:KEGG-mmu00600	1	18	41	5.55556	43.9024	-0.395203	1	1
Butanoate metabolism:KEGG-mmu00650	1	18	31	5.55556	58.0645	-0.395203	1	1
Folate biosynthesis:KEGG-mmu00790	0	2	13	0	15.3846	-0.419588	1	1
Fatty acid biosynthesis:KEGG-mmu00061	0	2	6	0	33.3333	-0.419588	1	1
Biosynthesis of unsaturated fatty acids:KEGG-mmu01040	0	2	7	0	28.5714	-0.419588	1	1
Vasopressin-regulated water reabsorption:KEGG-mmu04962	2	33	43	6.06061	76.7442	-0.429488	1	1
PPAR signaling pathway:KEGG-mmu03320	2	33	79	6.06061	41.7722	-0.429488	1	1
Pyruvate metabolism:KEGG-mmu00620	1	19	41	5.26316	46.3415	-0.452991	1	1
Citrate cycle (TCA cycle):KEGG-mmu00020	1	19	31	5.26316	61.2903	-0.452991	1	1
Lysosome:KEGG-mmu04142	5	75	122	6.66667	61.4754	-0.45722	0.83048	1
Glutathione metabolism:KEGG-mmu00480	1	20	50	5	40	-0.508142	1	1
Glycerophospholipid metabolism:KEGG-mmu00564	3	49	80	6.12245	61.25	-0.508781	0.79448	1
Vitamin B6 metabolism:KEGG-mmu00750	0	3	7	0	42.8571	-0.513975	1	1
Ubiquinone and other terpenoid-quinone biosynthesis:KEGG-mmu00130	0	3	7	0	42.8571	-0.513975	1	1
Taurine and hypotaurine metabolism:KEGG-mmu00430	0	3	10	0	30	-0.513975	1	1
Non-homologous end-joining:KEGG-mmu03450	0	3	13	0	23.0769	-0.513975	1	1
Leishmaniasis:KEGG-mmu05140	2	36	64	5.55556	56.25	-0.560623	0.764912	1
Metabolism of xenobiotics by cytochrome P450:KEGG-mmu00980	1	21	78	4.7619	26.9231	-0.560934	1	1
Fat digestion and absorption:KEGG-mmu04975	1	21	44	4.7619	47.7273	-0.560934	1	1
Oxidative phosphorylation:KEGG-mmu00190	5	79	131	6.32911	60.3053	-0.581102	0.679611	1
Pancreatic cancer:KEGG-mmu05212	3	51	70	5.88235	72.8571	-0.582665	0.795223	1
Thiamine metabolism:KEGG-mmu00730	0	4	4	0	100	-0.593587	1	1
Sulfur metabolism:KEGG-mmu00920	0	4	10	0	40	-0.593587	1	1
Inositol phosphate metabolism:KEGG-mmu00562	2	37	57	5.40541	64.9123	-0.602157	0.764853	1
Jak-STAT signaling pathway:KEGG-mmu04630	4	66	155	6.06061	42.5806	-0.610847	0.817779	1
SNARE interactions in vesicular transport:KEGG-mmu04130	1	22	35	4.54545	62.8571	-0.611601	1	1
Drug metabolism - cytochrome P450:KEGG-mmu00982	1	22	88	4.54545	25	-0.611601	1	1
Type I diabetes mellitus:KEGG-mmu04940	1	23	56	4.34783	41.0714	-0.660345	1	1
Sulfur relay system:KEGG-mmu04122	0	5	10	0	50	-0.663763	1	1
Selenocompound metabolism:KEGG-mmu00450	0	5	13	0	38.4615	-0.663763	1	1
Riboflavin metabolism:KEGG-mmu00740	0	5	12	0	41.6667	-0.663763	1	1
Fatty acid elongation in mitochondria:KEGG-mmu00062	0	5	8	0	62.5	-0.663763	1	1
Caffeine metabolism:KEGG-mmu00232	0	5	9	0	55.5556	-0.663763	1	1
Adipocytokine signaling pathway:KEGG-mmu04920	2	39	69	5.12821	56.5217	-0.682334	0.766358	1
Chronic myeloid leukemia:KEGG-mmu05220	3	54	73	5.55556	73.9726	-0.688747	0.79883	1
Synthesis and degradation of ketone bodies:KEGG-mmu00072	0	6	11	0	54.5455	-0.72724	1	1
Glycosaminoglycan biosynthesis - chondroitin sulfate:KEGG-mmu00532	0	6	13	0	46.1538	-0.72724	1	1
Arachidonic acid metabolism:KEGG-mmu00590	1	25	83	4	30.1205	-0.752739	0.716737	1
Renal cell carcinoma:KEGG-mmu05211	3	56	71	5.35714	78.8732	-0.756599	0.621739	1
Renin-angiotensin system:KEGG-mmu04614	0	7	18	0	38.8889	-0.785642	1	1
mTOR signaling pathway:KEGG-mmu04150	2	43	53	4.65116	81.1321	-0.83252	0.576516	1
Notch signaling pathway:KEGG-mmu04330	1	27	49	3.7037	55.102	-0.839255	0.720038	1
Complement and coagulation cascades:KEGG-mmu04610	1	27	76	3.7037	35.5263	-0.839255	0.720038	1
alpha-Linolenic acid metabolism:KEGG-mmu00592	0	8	19	0	42.1053	-0.840029	1	1
Valine, leucine and isoleucine biosynthesis:KEGG-mmu00290	0	8	11	0	72.7273	-0.840029	1	1
Pantothenate and CoA biosynthesis:KEGG-mmu00770	0	8	16	0	50	-0.840029	1	1
Linoleic acid metabolism:KEGG-mmu00591	0	8	45	0	17.7778	-0.840029	1	1
Asthma:KEGG-mmu05310	0	8	23	0	34.7826	-0.840029	1	1
Ascorbate and aldarate metabolism:KEGG-mmu00053	0	8	25	0	32	-0.840029	1	1
TGF-beta signaling pathway:KEGG-mmu04350	2	44	84	4.54545	52.381	-0.868196	0.577394	1
Rheumatoid arthritis:KEGG-mmu05323	2	44	82	4.54545	53.6585	-0.868196	0.577394	1
Mismatch repair:KEGG-mmu03430	0	9	22	0	40.9091	-0.891136	1	1
Glyoxylate and dicarboxylate metabolism:KEGG-mmu00630	0	9	19	0	47.3684	-0.891136	1	1
Glycosylphosphatidylinositol(GPI)-anchor biosynthesis:KEGG-mmu00563	0	9	23	0	39.1304	-0.891136	1	1
RIG-I-like receptor signaling pathway:KEGG-mmu04622	1	29	69	3.44828	42.029	-0.920771	0.726479	1
Peroxisome:KEGG-mmu04146	2	46	79	4.34783	58.2278	-0.937554	0.581361	1
Terpenoid backbone biosynthesis:KEGG-mmu00900	0	10	15	0	66.6667	-0.9395	1	1
Histidine metabolism:KEGG-mmu00340	0	10	28	0	35.7143	-0.9395	1	1
Insulin signaling pathway:KEGG-mmu04910	5	92	137	5.43478	67.1533	-0.948097	0.438487	1
Vitamin digestion and absorption:KEGG-mmu04977	0	11	24	0	45.8333	-0.985523	1	1
Steroid biosynthesis:KEGG-mmu00100	0	11	18	0	61.1111	-0.985523	1	1
Glycosaminoglycan degradation:KEGG-mmu00531	0	11	21	0	52.381	-0.985523	1	1
Phagosome:KEGG-mmu04145	4	79	165	5.06329	47.8788	-0.999309	0.405591	1
Toll-like receptor signaling pathway:KEGG-mmu04620	2	49	100	4.08163	49	-1.03705	0.429539	1
Lysine degradation:KEGG-mmu00310	1	33	50	3.0303	66	-1.07144	0.515024	1
Regulation of autophagy:KEGG-mmu04140	0	13	35	0	37.1429	-1.07174	0.617032	1
Cytokine-cytokine receptor interaction:KEGG-mmu04060	5	97	253	5.15464	38.3399	-1.07725	0.346395	1
beta-Alanine metabolism:KEGG-mmu00410	0	14	28	0	50	-1.11239	0.620937	1
Primary immunodeficiency:KEGG-mmu05340	0	14	34	0	41.1765	-1.11239	0.620937	1
DNA replication:KEGG-mmu03030	0	14	35	0	40	-1.11239	0.620937	1
Systemic lupus erythematosus:KEGG-mmu05322	1	35	138	2.85714	25.3623	-1.1416	0.359329	1
Protein export:KEGG-mmu03060	0	15	25	0	60	-1.15163	0.626728	1
Porphyrin and chlorophyll metabolism:KEGG-mmu00860	0	15	38	0	39.4737	-1.15163	0.626728	1
Graft-versus-host disease:KEGG-mmu05332	0	15	51	0	29.4118	-1.15163	0.626728	1
Glycine, serine and threonine metabolism:KEGG-mmu00260	0	15	34	0	44.1176	-1.15163	0.626728	1
Base excision repair:KEGG-mmu03410	0	15	33	0	45.4545	-1.15163	0.626728	1
Tryptophan metabolism:KEGG-mmu00380	0	16	44	0	36.3636	-1.1896	0.634075	1
Ether lipid metabolism:KEGG-mmu00565	0	16	34	0	47.0588	-1.1896	0.634075	1
Dorso-ventral axis formation:KEGG-mmu04320	0	16	22	0	72.7273	-1.1896	0.634075	1
Autoimmune thyroid disease:KEGG-mmu05320	0	16	64	0	25	-1.1896	0.634075	1
Allograft rejection:KEGG-mmu05330	0	16	49	0	32.6531	-1.1896	0.634075	1
Staphylococcus aureus infection:KEGG-mmu05150	0	17	50	0	34	-1.22642	0.390812	1
Propanoate metabolism:KEGG-mmu00640	0	17	31	0	54.8387	-1.22642	0.390812	1
Retinol metabolism:KEGG-mmu00830	0	19	75	0	25.3333	-1.29699	0.395086	1
RNA polymerase:KEGG-mmu03020	0	19	30	0	63.3333	-1.29699	0.395086	1
Fatty acid metabolism:KEGG-mmu00071	0	19	47	0	40.4255	-1.29699	0.395086	1
Steroid hormone biosynthesis:KEGG-mmu00140	0	20	55	0	36.3636	-1.33091	0.40038	1
Hepatitis C:KEGG-mmu05160	3	76	137	3.94737	55.4745	-1.34107	0.281428	0.952851
Nucleotide excision repair:KEGG-mmu03420	0	21	43	0	48.8372	-1.36401	0.407467	1
Mineral absorption:KEGG-mmu04978	0	21	44	0	47.7273	-1.36401	0.407467	1
RNA degradation:KEGG-mmu03018	1	42	74	2.38095	56.7568	-1.36604	0.252925	0.894912
Valine, leucine and isoleucine degradation:KEGG-mmu00280	0	22	50	0	44	-1.39635	0.251592	0.894912
ABC transporters:KEGG-mmu02010	0	22	45	0	48.8889	-1.39635	0.251592	0.894912
Drug metabolism - other enzymes:KEGG-mmu00983	0	23	58	0	39.6552	-1.42798	0.252176	0.894912
Basal transcription factors:KEGG-mmu03022	0	24	44	0	54.5455	-1.45894	0.254553	0.894912
Aminoacyl-tRNA biosynthesis:KEGG-mmu00970	0	27	42	0	64.2857	-1.54823	0.163146	0.766543
Cytosolic DNA-sensing pathway:KEGG-mmu04623	0	28	62	0	45.1613	-1.57691	0.163529	0.766543
Hedgehog signaling pathway:KEGG-mmu04340	0	30	54	0	55.5556	-1.63282	0.168159	0.772157
Proteasome:KEGG-mmu03050	0	34	47	0	72.3404	-1.73945	0.107745	0.655206
mRNA surveillance pathway:KEGG-mmu03015	1	56	88	1.78571	63.6364	-1.74609	0.0845984	0.52874
Ribosome biogenesis in eukaryotes:KEGG-mmu03008	0	45	79	0	56.962	-2.00493	0.0472703	0.387187
Ubiquitin mediated proteolysis:KEGG-mmu04120	2	88	138	2.27273	63.7681	-2.03093	0.0443037	0.383398
Spliceosome:KEGG-mmu03040	1	71	132	1.40845	53.7879	-2.08918	0.0275096	0.257902
RNA transport:KEGG-mmu03013	2	92	162	2.17391	56.7901	-2.11334	0.030921	0.278289
Ribosome:KEGG-mmu03010	0	54	118	0	45.7627	-2.19969	0.019944	0.217063

## Sheet: GOassociations
Ensembl	symbol	GeneOntology
ENSMUSG00000018909	Arrb1	GO:0035774
ENSMUSG00000026185	Igfbp5	GO:0044342
ENSMUSG00000037940	Inpp4b	GO:0046434
ENSMUSG00000030283	St8sia1	GO:0034605
ENSMUSG00000039579	Grin3a	GO:0016358
ENSMUSG00000042453	Reln	GO:0016358
ENSMUSG00000052920	Prkg1	GO:0016358
ENSMUSG00000026782	Abi2	GO:0016358
ENSMUSG00000038976	Ppp1r9b	GO:0016358
ENSMUSG00000021743	Fezf2	GO:0016358
ENSMUSG00000025810	Nrp1	GO:0016358
ENSMUSG00000048482	Bdnf	GO:0016358
ENSMUSG00000069171	Nr2f1	GO:0044323
ENSMUSG00000030905	Crym	GO:0047127
ENSMUSG00000027222	Pex16	GO:0016557
ENSMUSG00000047139	Cd24a	GO:0002706
ENSMUSG00000047139	Cd24a	GO:0002705
ENSMUSG00000047139	Cd24a	GO:0002703
ENSMUSG00000017631	Abr	GO:0002703
ENSMUSG00000033307	Mif	GO:0002702
ENSMUSG00000030067	Foxp1	GO:0002702
ENSMUSG00000033307	Mif	GO:0002700
ENSMUSG00000030067	Foxp1	GO:0002700
ENSMUSG00000019769	Syne1	GO:0051656
ENSMUSG00000025020	Slit1	GO:0051656
ENSMUSG00000021068	Nin	GO:0051651
ENSMUSG00000031328	Flna	GO:0051651
ENSMUSG00000003378	Grik5	GO:0051651
ENSMUSG00000001552	Jup	GO:0051651
ENSMUSG00000022105	Rb1	GO:0051651
ENSMUSG00000019769	Syne1	GO:0051651
ENSMUSG00000004849	Ap1s1	GO:0030120
ENSMUSG00000047139	Cd24a	GO:0002709
ENSMUSG00000047139	Cd24a	GO:0002708
ENSMUSG00000060126	Tpt1	GO:2000384
ENSMUSG00000039474	Wfs1	GO:0003091
ENSMUSG00000027500	Stmn2	GO:0051495
ENSMUSG00000019997	Ctgf	GO:0051495
ENSMUSG00000042429	Adora1	GO:0003093
ENSMUSG00000062077	Trim54	GO:0051493
ENSMUSG00000025432	Avil	GO:0051493
ENSMUSG00000005583	Mef2c	GO:0051493
ENSMUSG00000048915	Efna5	GO:0051493
ENSMUSG00000027500	Stmn2	GO:0051493
ENSMUSG00000052504	Epha3	GO:0051493
ENSMUSG00000032366	Tpm1	GO:0051493
ENSMUSG00000025372	Baiap2	GO:0051493
ENSMUSG00000019997	Ctgf	GO:0051493
ENSMUSG00000027254	Mtap1a	GO:0051493
ENSMUSG00000019997	Ctgf	GO:0051492
ENSMUSG00000027985	Lef1	GO:0030852
ENSMUSG00000017631	Abr	GO:0005100
ENSMUSG00000035954	Dock4	GO:0005100
ENSMUSG00000021478	Drd1a	GO:0033238
ENSMUSG00000027985	Lef1	GO:0030854
ENSMUSG00000000378	Ccm2	GO:0030855
ENSMUSG00000000440	Pparg	GO:0030855
ENSMUSG00000005583	Mef2c	GO:0030855
ENSMUSG00000051367	Six1	GO:0030855
ENSMUSG00000023972	Ptk7	GO:0030855
ENSMUSG00000033953	Ppp3r1	GO:0030855
ENSMUSG00000008575	Nfib	GO:0030855
ENSMUSG00000034472	Rasd2	GO:0033233
ENSMUSG00000038418	Egr1	GO:0033233
ENSMUSG00000018965	Ywhah	GO:0007088
ENSMUSG00000022105	Rb1	GO:0007088
ENSMUSG00000021478	Drd1a	GO:0046503
ENSMUSG00000005899	Smpd4	GO:0046503
ENSMUSG00000018501	Ncor1	GO:0072362
ENSMUSG00000050896	Rtn4rl2	GO:0031103
ENSMUSG00000042834	D0H4S114	GO:0031103
ENSMUSG00000045287	Rtn4rl1	GO:0031103
ENSMUSG00000022055	Nefl	GO:0031103
ENSMUSG00000050896	Rtn4rl2	GO:0031102
ENSMUSG00000042834	D0H4S114	GO:0031102
ENSMUSG00000045287	Rtn4rl1	GO:0031102
ENSMUSG00000022055	Nefl	GO:0031102
ENSMUSG00000030189	Csda	GO:0031100
ENSMUSG00000022309	Angpt1	GO:0031100
ENSMUSG00000000440	Pparg	GO:0031100
ENSMUSG00000028864	Hgf	GO:0031100
ENSMUSG00000027985	Lef1	GO:0031100
ENSMUSG00000054263	Lifr	GO:0031100
ENSMUSG00000046230	Vps13a	GO:0035176
ENSMUSG00000026959	Grin1	GO:0035176
ENSMUSG00000025810	Nrp1	GO:0060600
ENSMUSG00000030123	Plxnd1	GO:0060600
ENSMUSG00000041798	Gck	GO:0044321
ENSMUSG00000042429	Adora1	GO:0045859
ENSMUSG00000022309	Angpt1	GO:0045859
ENSMUSG00000029223	Uchl1	GO:0045859
ENSMUSG00000022861	Dgkg	GO:0045859
ENSMUSG00000027330	Cdc25b	GO:0045859
ENSMUSG00000042453	Reln	GO:0045859
ENSMUSG00000026872	Zeb2	GO:0045859
ENSMUSG00000021478	Drd1a	GO:0045859
ENSMUSG00000036095	Dgkb	GO:0045859
ENSMUSG00000033307	Mif	GO:0045859
ENSMUSG00000047139	Cd24a	GO:0045859
ENSMUSG00000028864	Hgf	GO:0045859
ENSMUSG00000033055	Ankrd54	GO:0045859
ENSMUSG00000027223	Mapk8ip1	GO:0045859
ENSMUSG00000031530	Dusp4	GO:0045859
ENSMUSG00000050965	Prkca	GO:0045859
ENSMUSG00000032532	Cck	GO:0045859
ENSMUSG00000022419	Deptor	GO:0045859
ENSMUSG00000018909	Arrb1	GO:0045859
ENSMUSG00000031565	Fgfr1	GO:0045859
ENSMUSG00000030866	Ern2	GO:0045859
ENSMUSG00000020785	Camkk1	GO:0045859
ENSMUSG00000027996	Sfrp2	GO:0045859
ENSMUSG00000022105	Rb1	GO:0045859
ENSMUSG00000020601	Trib2	GO:0045859
ENSMUSG00000066406	Akap13	GO:0045859
ENSMUSG00000019966	Kitl	GO:0045859
ENSMUSG00000026235	Epha4	GO:0045859
ENSMUSG00000025422	Agap2	GO:0045859
ENSMUSG00000000440	Pparg	GO:0001067
ENSMUSG00000040363	Bcor	GO:0001067
ENSMUSG00000048251	Bcl11b	GO:0001067
ENSMUSG00000005583	Mef2c	GO:0001067
ENSMUSG00000051367	Six1	GO:0001067
ENSMUSG00000027985	Lef1	GO:0001067
ENSMUSG00000038255	Neurod2	GO:0001067
ENSMUSG00000018909	Arrb1	GO:0001067
ENSMUSG00000053477	Tcf4	GO:0001067
ENSMUSG00000021743	Fezf2	GO:0001067
ENSMUSG00000032185	Carm1	GO:0001067
ENSMUSG00000038418	Egr1	GO:0001067
ENSMUSG00000027109	Sp3	GO:0001067
ENSMUSG00000069171	Nr2f1	GO:0001067
ENSMUSG00000022105	Rb1	GO:0001067
ENSMUSG00000013089	Etv5	GO:0001067
ENSMUSG00000050965	Prkca	GO:0035173
ENSMUSG00000052372	Il1rapl1	GO:0032413
ENSMUSG00000039156	Stim2	GO:0032413
ENSMUSG00000018501	Ncor1	GO:0072361
ENSMUSG00000053004	Hrh1	GO:0034776
ENSMUSG00000019997	Ctgf	GO:0044246
ENSMUSG00000042429	Adora1	GO:0002673
ENSMUSG00000000440	Pparg	GO:0002673
ENSMUSG00000033307	Mif	GO:0002673
ENSMUSG00000020458	Rtn4	GO:0050771
ENSMUSG00000025810	Nrp1	GO:0050771
ENSMUSG00000025020	Slit1	GO:0050771
ENSMUSG00000026235	Epha4	GO:0050771
ENSMUSG00000032336	Nptn	GO:0050839
ENSMUSG00000063887	Nlgn1	GO:0050839
ENSMUSG00000009687	Fxyd5	GO:0050839
ENSMUSG00000031565	Fgfr1	GO:0050839
ENSMUSG00000000555	Itga5	GO:0050839
ENSMUSG00000001552	Jup	GO:0050839
ENSMUSG00000027748	Trpc4	GO:0050839
ENSMUSG00000031841	Cdh13	GO:0050839
ENSMUSG00000047139	Cd24a	GO:0030295
ENSMUSG00000025422	Agap2	GO:0030295
ENSMUSG00000033307	Mif	GO:0002675
ENSMUSG00000042429	Adora1	GO:0002674
ENSMUSG00000000440	Pparg	GO:0002674
ENSMUSG00000020277	Pfkl	GO:0090278
ENSMUSG00000028161	Ppp3ca	GO:0090278
ENSMUSG00000006818	Sod2	GO:0006575
ENSMUSG00000043301	Kcnj6	GO:0006575
ENSMUSG00000042453	Reln	GO:0006575
ENSMUSG00000030905	Crym	GO:0006575
ENSMUSG00000027533	Fabp5	GO:0006576
ENSMUSG00000026204	Ptprn	GO:0034284
ENSMUSG00000041417	Pik3r1	GO:0034284
ENSMUSG00000020277	Pfkl	GO:0034284
ENSMUSG00000003378	Grik5	GO:0034284
ENSMUSG00000041798	Gck	GO:0034284
ENSMUSG00000038418	Egr1	GO:0034284
ENSMUSG00000019997	Ctgf	GO:0034284
ENSMUSG00000021125	Arg2	GO:0034284
ENSMUSG00000028161	Ppp3ca	GO:0034284
ENSMUSG00000041798	Gck	GO:0044320
ENSMUSG00000002900	Lamb1	GO:0046625
ENSMUSG00000033307	Mif	GO:0050772
ENSMUSG00000022055	Nefl	GO:0050772
ENSMUSG00000018965	Ywhah	GO:0051783
ENSMUSG00000022105	Rb1	GO:0051783
ENSMUSG00000027330	Cdc25b	GO:0051781
ENSMUSG00000033307	Mif	GO:0051223
ENSMUSG00000031328	Flna	GO:0051223
ENSMUSG00000001552	Jup	GO:0051223
ENSMUSG00000027996	Sfrp2	GO:0051223
ENSMUSG00000038128	Camk4	GO:0051223
ENSMUSG00000022105	Rb1	GO:0051785
ENSMUSG00000039474	Wfs1	GO:0051789
ENSMUSG00000025757	Hspa4l	GO:0051789
ENSMUSG00000041417	Pik3r1	GO:0051789
ENSMUSG00000021270	Hsp90aa1	GO:0051789
ENSMUSG00000030866	Ern2	GO:0051789
ENSMUSG00000027210	Meis2	GO:0051789
ENSMUSG00000030104	Edem1	GO:0051789
ENSMUSG00000044783	Hjurp	GO:0000775
ENSMUSG00000016494	Cd34	GO:0043199
ENSMUSG00000033307	Mif	GO:0090342
ENSMUSG00000039145	Camk1d	GO:0060263
ENSMUSG00000024713	Pcsk5	GO:0048565
ENSMUSG00000022105	Rb1	GO:0048565
ENSMUSG00000021125	Arg2	GO:0048565
ENSMUSG00000024421	Lama3	GO:0005606
ENSMUSG00000002900	Lamb1	GO:0005606
ENSMUSG00000024713	Pcsk5	GO:0048566
ENSMUSG00000048251	Bcl11b	GO:0048569
ENSMUSG00000022306	Zfpm2	GO:0048568
ENSMUSG00000024713	Pcsk5	GO:0048568
ENSMUSG00000045216	Hs6st1	GO:0048568
ENSMUSG00000027109	Sp3	GO:0048568
ENSMUSG00000019966	Kitl	GO:0048568
ENSMUSG00000031837	Necab2	GO:0017000
ENSMUSG00000027489	Necab3	GO:0017000
ENSMUSG00000040536	Necab1	GO:0017000
ENSMUSG00000048251	Bcl11b	GO:0031077
ENSMUSG00000021822	Plau	GO:0014909
ENSMUSG00000018501	Ncor1	GO:0090311
ENSMUSG00000026185	Igfbp5	GO:0010906
ENSMUSG00000069106	Gm8910	GO:0010906
ENSMUSG00000033307	Mif	GO:0010906
ENSMUSG00000018501	Ncor1	GO:0010906
ENSMUSG00000041798	Gck	GO:0010906
ENSMUSG00000011752	Pgam1	GO:0010906
ENSMUSG00000050896	Rtn4rl2	GO:0046658
ENSMUSG00000055653	Gpc3	GO:0046658
ENSMUSG00000048915	Efna5	GO:0046658
ENSMUSG00000047139	Cd24a	GO:0046658
ENSMUSG00000045287	Rtn4rl1	GO:0046658
ENSMUSG00000059857	Ntng1	GO:0046658
ENSMUSG00000035513	Ntng2	GO:0046658
ENSMUSG00000054814	Usp46	GO:0005488
ENSMUSG00000002010	Idh3g	GO:0005488
ENSMUSG00000047907	Tshz2	GO:0005488
ENSMUSG00000055003	Lrtm2	GO:0005488
ENSMUSG00000023927	Satb1	GO:0005488
ENSMUSG00000058624	Gda	GO:0005488
ENSMUSG00000046699	Slitrk4	GO:0005488
ENSMUSG00000005610	Eif4g2	GO:0005488
ENSMUSG00000006818	Sod2	GO:0005488
ENSMUSG00000030189	Csda	GO:0005488
ENSMUSG00000030020	Prickle2	GO:0005488
ENSMUSG00000028931	Kcnab2	GO:0005488
ENSMUSG00000032336	Nptn	GO:0005488
ENSMUSG00000035033	Tbr1	GO:0005488
ENSMUSG00000050896	Rtn4rl2	GO:0005488
ENSMUSG00000032332	Col12a1	GO:0005488
ENSMUSG00000000378	Ccm2	GO:0005488
ENSMUSG00000073888	Ccl27a	GO:0005488
ENSMUSG00000024049	Myom1	GO:0005488
ENSMUSG00000033863	Klf9	GO:0005488
ENSMUSG00000022390	Zc3h7b	GO:0005488
ENSMUSG00000048078	Odz4	GO:0005488
ENSMUSG00000052852	Reep1	GO:0005488
ENSMUSG00000021217	Tshz3	GO:0005488
ENSMUSG00000040495	Chrm4	GO:0005488
ENSMUSG00000051379	Flrt3	GO:0005488
ENSMUSG00000019986	Ahi1	GO:0005488
ENSMUSG00000028347	Tmeff1	GO:0005488
ENSMUSG00000027016	Zfp385b	GO:0005488
ENSMUSG00000042429	Adora1	GO:0005488
ENSMUSG00000078566	Bnip3	GO:0005488
ENSMUSG00000021814	Anxa7	GO:0005488
ENSMUSG00000022761	Lztr1	GO:0005488
ENSMUSG00000018589	Glra2	GO:0005488
ENSMUSG00000042834	D0H4S114	GO:0005488
ENSMUSG00000031169	Porcn	GO:0005488
ENSMUSG00000019359	Gdpd2	GO:0005488
ENSMUSG00000058927	Gm10053	GO:0005488
ENSMUSG00000044216	Kcnj4	GO:0005488
ENSMUSG00000063882	Uqcrh	GO:0005488
ENSMUSG00000063887	Nlgn1	GO:0005488
ENSMUSG00000032564	Cpne4	GO:0005488
ENSMUSG00000026335	Pam	GO:0005488
ENSMUSG00000022309	Angpt1	GO:0005488
ENSMUSG00000022306	Zfpm2	GO:0005488
ENSMUSG00000001175	Calm1	GO:0005488
ENSMUSG00000033316	Galnt9	GO:0005488
ENSMUSG00000037710	Cisd1	GO:0005488
ENSMUSG00000022965	Ifngr2	GO:0005488
ENSMUSG00000039579	Grin3a	GO:0005488
ENSMUSG00000006958	Chrd	GO:0005488
ENSMUSG00000039474	Wfs1	GO:0005488
ENSMUSG00000009687	Fxyd5	GO:0005488
ENSMUSG00000026833	Olfm1	GO:0005488
ENSMUSG00000057236	Rbbp4	GO:0005488
ENSMUSG00000026837	Col5a1	GO:0005488
ENSMUSG00000020402	Vdac1	GO:0005488
ENSMUSG00000038473	Nos1ap	GO:0005488
ENSMUSG00000058400	Qrfpr	GO:0005488
ENSMUSG00000036766	Dner	GO:0005488
ENSMUSG00000029223	Uchl1	GO:0005488
ENSMUSG00000048799	Cep120	GO:0005488
ENSMUSG00000024617	Camk2a	GO:0005488
ENSMUSG00000046230	Vps13a	GO:0005488
ENSMUSG00000022861	Dgkg	GO:0005488
ENSMUSG00000048490	Nrip1	GO:0005488
ENSMUSG00000027533	Fabp5	GO:0005488
ENSMUSG00000020964	Sel1l	GO:0005488
ENSMUSG00000053310	Nrgn	GO:0005488
ENSMUSG00000059040	Gm5506	GO:0005488
ENSMUSG00000039714	Cplx3	GO:0005488
ENSMUSG00000037362	Nov	GO:0005488
ENSMUSG00000046523	Kctd4	GO:0005488
ENSMUSG00000046159	Chrm3	GO:0005488
ENSMUSG00000043301	Kcnj6	GO:0005488
ENSMUSG00000030701	Plekhb1	GO:0005488
ENSMUSG00000046480	Scn4b	GO:0005488
ENSMUSG00000033377	Palmd	GO:0005488
ENSMUSG00000046093	Hpcal4	GO:0005488
ENSMUSG00000027330	Cdc25b	GO:0005488
ENSMUSG00000042453	Reln	GO:0005488
ENSMUSG00000026202	Tuba4a	GO:0005488
ENSMUSG00000026204	Ptprn	GO:0005488
ENSMUSG00000019433	Gipc1	GO:0005488
ENSMUSG00000071866	Ppia	GO:0005488
ENSMUSG00000033615	Cplx1	GO:0005488
ENSMUSG00000022246	Rai14	GO:0005488
ENSMUSG00000040183	Ankrd6	GO:0005488
ENSMUSG00000048138	Dmrt2	GO:0005488
ENSMUSG00000038967	Pdk2	GO:0005488
ENSMUSG00000037217	Syn1	GO:0005488
ENSMUSG00000007989	Fzd3	GO:0005488
ENSMUSG00000004637	Wwox	GO:0005488
ENSMUSG00000026185	Igfbp5	GO:0005488
ENSMUSG00000000440	Pparg	GO:0005488
ENSMUSG00000016179	Camk1g	GO:0005488
ENSMUSG00000028385	Snx30	GO:0005488
ENSMUSG00000036510	Cdh8	GO:0005488
ENSMUSG00000066456	Hmgn3	GO:0005488
ENSMUSG00000031837	Necab2	GO:0005488
ENSMUSG00000039782	Cpeb2	GO:0005488
ENSMUSG00000025876	Unc5a	GO:0005488
ENSMUSG00000002332	Dhrs1	GO:0005488
ENSMUSG00000062077	Trim54	GO:0005488
ENSMUSG00000062070	Pgk1	GO:0005488
ENSMUSG00000052920	Prkg1	GO:0005488
ENSMUSG00000052928	Ctif	GO:0005488
ENSMUSG00000006418	Rnf114	GO:0005488
ENSMUSG00000057069	Ero1lb	GO:0005488
ENSMUSG00000029009	Mthfr	GO:0005488
ENSMUSG00000018417	Myo1b	GO:0005488
ENSMUSG00000023944	Hsp90ab1	GO:0005488
ENSMUSG00000044813	Shb	GO:0005488
ENSMUSG00000040258	Nxph4	GO:0005488
ENSMUSG00000053819	Camk2d	GO:0005488
ENSMUSG00000022054	Nefm	GO:0005488
ENSMUSG00000029001	Fbxo44	GO:0005488
ENSMUSG00000058420	Syt17	GO:0005488
ENSMUSG00000025432	Avil	GO:0005488
ENSMUSG00000025402	Nab2	GO:0005488
ENSMUSG00000049225	Pdp1	GO:0005488
ENSMUSG00000036815	Dpp10	GO:0005488
ENSMUSG00000064115	Cadm2	GO:0005488
ENSMUSG00000042590	Ipo11	GO:0005488
ENSMUSG00000044221	Grsf1	GO:0005488
ENSMUSG00000003363	Pld3	GO:0005488
ENSMUSG00000009647	Ccdc109a	GO:0005488
ENSMUSG00000026872	Zeb2	GO:0005488
ENSMUSG00000005973	Rcn1	GO:0005488
ENSMUSG00000024782	Ak3	GO:0005488
ENSMUSG00000025582	Nptx1	GO:0005488
ENSMUSG00000058441	Panx2	GO:0005488
ENSMUSG00000025478	Dpysl4	GO:0005488
ENSMUSG00000022377	Asap1	GO:0005488
ENSMUSG00000003099	Ppp5c	GO:0005488
ENSMUSG00000029174	Tbc1d1	GO:0005488
ENSMUSG00000032238	Rora	GO:0005488
ENSMUSG00000054027	Nt5dc3	GO:0005488
ENSMUSG00000024713	Pcsk5	GO:0005488
ENSMUSG00000061731	Ext1	GO:0005488
ENSMUSG00000025909	Sntg1	GO:0005488
ENSMUSG00000037747	Phyhipl	GO:0005488
ENSMUSG00000005338	Cadm3	GO:0005488
ENSMUSG00000074305	C230081A13Rik	GO:0005488
ENSMUSG00000022947	Cbr3	GO:0005488
ENSMUSG00000030905	Crym	GO:0005488
ENSMUSG00000040363	Bcor	GO:0005488
ENSMUSG00000027784	Ppm1l	GO:0005488
ENSMUSG00000018965	Ywhah	GO:0005488
ENSMUSG00000048251	Bcl11b	GO:0005488
ENSMUSG00000069106	Gm8910	GO:0005488
ENSMUSG00000039145	Camk1d	GO:0005488
ENSMUSG00000032936	Camkv	GO:0005488
ENSMUSG00000021668	Polk	GO:0005488
ENSMUSG00000023830	Igf2r	GO:0005488
ENSMUSG00000001911	Nfix	GO:0005488
ENSMUSG00000036438	Calm2	GO:0005488
ENSMUSG00000067578	Cbln4	GO:0005488
ENSMUSG00000001985	Grik3	GO:0005488
ENSMUSG00000046561	Arsj	GO:0005488
ENSMUSG00000025757	Hspa4l	GO:0005488
ENSMUSG00000042604	Kcna4	GO:0005488
ENSMUSG00000027356	Fermt1	GO:0005488
ENSMUSG00000027273	Snap25	GO:0005488
ENSMUSG00000005580	Adcy9	GO:0005488
ENSMUSG00000021068	Nin	GO:0005488
ENSMUSG00000005583	Mef2c	GO:0005488
ENSMUSG00000016319	Slc25a5	GO:0005488
ENSMUSG00000020189	Osbpl8	GO:0005488
ENSMUSG00000030474	Siglece	GO:0005488
ENSMUSG00000038886	Man2a2	GO:0005488
ENSMUSG00000045034	Ankrd34b	GO:0005488
ENSMUSG00000092083	Kcnb2	GO:0005488
ENSMUSG00000055540	Epha6	GO:0005488
ENSMUSG00000066652	Lefty2	GO:0005488
ENSMUSG00000042501	Cpa6	GO:0005488
ENSMUSG00000026782	Abi2	GO:0005488
ENSMUSG00000031972	Acta1	GO:0005488
ENSMUSG00000053617	Sh3pxd2a	GO:0005488
ENSMUSG00000031875	Cmtm3	GO:0005488
ENSMUSG00000026155	Smap1	GO:0005488
ENSMUSG00000032306	Mpi	GO:0005488
ENSMUSG00000041468	Gpr12	GO:0005488
ENSMUSG00000055447	Cd47	GO:0005488
ENSMUSG00000062232	Rapgef2	GO:0005488
ENSMUSG00000041936	Agrn	GO:0005488
ENSMUSG00000034023	Fancd2	GO:0005488
ENSMUSG00000021478	Drd1a	GO:0005488
ENSMUSG00000059173	Pde1a	GO:0005488
ENSMUSG00000051367	Six1	GO:0005488
ENSMUSG00000063694	Cycs	GO:0005488
ENSMUSG00000073433	Arhgdig	GO:0005488
ENSMUSG00000041556	Fbxo2	GO:0005488
ENSMUSG00000041417	Pik3r1	GO:0005488
ENSMUSG00000024566	Atp9b	GO:0005488
ENSMUSG00000027009	Itga4	GO:0005488
ENSMUSG00000035754	Wdr18	GO:0005488
ENSMUSG00000007944	Ttc9b	GO:0005488
ENSMUSG00000019906	Lin7a	GO:0005488
ENSMUSG00000020133	2310011J03Rik	GO:0005488
ENSMUSG00000021772	Nkiras1	GO:0005488
ENSMUSG00000004933	Matk	GO:0005488
ENSMUSG00000037126	Psd	GO:0005488
ENSMUSG00000055653	Gpc3	GO:0005488
ENSMUSG00000034295	Fhod3	GO:0005488
ENSMUSG00000048915	Efna5	GO:0005488
ENSMUSG00000078816	Prkcc	GO:0005488
ENSMUSG00000064043	Trerf1	GO:0005488
ENSMUSG00000019889	Ptprk	GO:0005488
ENSMUSG00000032470	Mras	GO:0005488
ENSMUSG00000036095	Dgkb	GO:0005488
ENSMUSG00000033307	Mif	GO:0005488
ENSMUSG00000053004	Hrh1	GO:0005488
ENSMUSG00000054693	Adam10	GO:0005488
ENSMUSG00000022707	Gbe1	GO:0005488
ENSMUSG00000006941	Eif1b	GO:0005488
ENSMUSG00000047139	Cd24a	GO:0005488
ENSMUSG00000004849	Ap1s1	GO:0005488
ENSMUSG00000079557	2002-03-01	GO:0005488
ENSMUSG00000035274	Tpbg	GO:0005488
ENSMUSG00000033287	Kctd17	GO:0005488
ENSMUSG00000026841	Fibcd1	GO:0005488
ENSMUSG00000028785	Hpca	GO:0005488
ENSMUSG00000036473	Tbc1d24	GO:0005488
ENSMUSG00000019082	Slc25a22	GO:0005488
ENSMUSG00000021591	Glrx	GO:0005488
ENSMUSG00000079037	Prnp	GO:0005488
ENSMUSG00000025892	Gria4	GO:0005488
ENSMUSG00000028864	Hgf	GO:0005488
ENSMUSG00000029392	Rilpl1	GO:0005488
ENSMUSG00000049107	Ntf3	GO:0005488
ENSMUSG00000037679	Inf2	GO:0005488
ENSMUSG00000027500	Stmn2	GO:0005488
ENSMUSG00000020704	Accn1	GO:0005488
ENSMUSG00000068747	Sort1	GO:0005488
ENSMUSG00000076433	BC100451	GO:0005488
ENSMUSG00000022376	Adcy8	GO:0005488
ENSMUSG00000027297	Ltk	GO:0005488
ENSMUSG00000023972	Ptk7	GO:0005488
ENSMUSG00000020836	Coro6	GO:0005488
ENSMUSG00000028565	Nfia	GO:0005488
ENSMUSG00000021820	Camk2g	GO:0005488
ENSMUSG00000033055	Ankrd54	GO:0005488
ENSMUSG00000027188	Pamr1	GO:0005488
ENSMUSG00000027223	Mapk8ip1	GO:0005488
ENSMUSG00000027222	Pex16	GO:0005488
ENSMUSG00000020904	Wdr16	GO:0005488
ENSMUSG00000025092	Hspa12a	GO:0005488
ENSMUSG00000036578	Fxyd7	GO:0005488
ENSMUSG00000034472	Rasd2	GO:0005488
ENSMUSG00000039270	Megf9	GO:0005488
ENSMUSG00000021730	Hcn1	GO:0005488
ENSMUSG00000008305	Tle1	GO:0005488
ENSMUSG00000054934	Kcnmb4	GO:0005488
ENSMUSG00000032615	Nt5m	GO:0005488
ENSMUSG00000038976	Ppp1r9b	GO:0005488
ENSMUSG00000016664	Pacsin2	GO:0005488
ENSMUSG00000027985	Lef1	GO:0005488
ENSMUSG00000017167	Cntnap1	GO:0005488
ENSMUSG00000026103	Gls	GO:0005488
ENSMUSG00000050965	Prkca	GO:0005488
ENSMUSG00000032356	Rasgrf1	GO:0005488
ENSMUSG00000040452	Cdh12	GO:0005488
ENSMUSG00000003814	Calr	GO:0005488
ENSMUSG00000022112	Gpc5	GO:0005488
ENSMUSG00000027963	Extl2	GO:0005488
ENSMUSG00000045095	Magi1	GO:0005488
ENSMUSG00000020277	Pfkl	GO:0005488
ENSMUSG00000020015	Cdk17	GO:0005488
ENSMUSG00000021270	Hsp90aa1	GO:0005488
ENSMUSG00000063524	Eno1	GO:0005488
ENSMUSG00000074575	Kcng1	GO:0005488
ENSMUSG00000044308	Ubr3	GO:0005488
ENSMUSG00000018476	Kdm6b	GO:0005488
ENSMUSG00000028488	Sh3gl2	GO:0005488
ENSMUSG00000024517	Grp	GO:0005488
ENSMUSG00000049176	Frmpd4	GO:0005488
ENSMUSG00000031328	Flna	GO:0005488
ENSMUSG00000032532	Cck	GO:0005488
ENSMUSG00000044783	Hjurp	GO:0005488
ENSMUSG00000029198	Grpel1	GO:0005488
ENSMUSG00000051920	Rspo2	GO:0005488
ENSMUSG00000062604	Srpk2	GO:0005488
ENSMUSG00000019370	Calm3	GO:0005488
ENSMUSG00000021314	Amph	GO:0005488
ENSMUSG00000038255	Neurod2	GO:0005488
ENSMUSG00000038256	Bcl9	GO:0005488
ENSMUSG00000038257	Glra3	GO:0005488
ENSMUSG00000020458	Rtn4	GO:0005488
ENSMUSG00000003378	Grik5	GO:0005488
ENSMUSG00000029207	Apbb2	GO:0005488
ENSMUSG00000029103	Lrpap1	GO:0005488
ENSMUSG00000029101	Rgs12	GO:0005488
ENSMUSG00000032549	Rab6b	GO:0005488
ENSMUSG00000029108	Pcdh7	GO:0005488
ENSMUSG00000037736	Limch1	GO:0005488
ENSMUSG00000064293	Cntn4	GO:0005488
ENSMUSG00000039457	Ppl	GO:0005488
ENSMUSG00000020061	Mybpc1	GO:0005488
ENSMUSG00000040490	Lrfn2	GO:0005488
ENSMUSG00000032826	Ank2	GO:0005488
ENSMUSG00000032946	Rasgrp2	GO:0005488
ENSMUSG00000034009	Rxfp1	GO:0005488
ENSMUSG00000042589	Cux2	GO:0005488
ENSMUSG00000022416	Cacna1i	GO:0005488
ENSMUSG00000022419	Deptor	GO:0005488
ENSMUSG00000045287	Rtn4rl1	GO:0005488
ENSMUSG00000025324	Atp10a	GO:0005488
ENSMUSG00000036545	Adamts2	GO:0005488
ENSMUSG00000036304	Zdhhc23	GO:0005488
ENSMUSG00000018909	Arrb1	GO:0005488
ENSMUSG00000000275	Trim25	GO:0005488
ENSMUSG00000021866	Anxa11	GO:0005488
ENSMUSG00000043313	Pcdhb19	GO:0005488
ENSMUSG00000005899	Smpd4	GO:0005488
ENSMUSG00000045659	Plekha7	GO:0005488
ENSMUSG00000052504	Epha3	GO:0005488
ENSMUSG00000029436	Mmp17	GO:0005488
ENSMUSG00000037996	Slc24a2	GO:0005488
ENSMUSG00000032482	Cspg5	GO:0005488
ENSMUSG00000020638	Cmpk2	GO:0005488
ENSMUSG00000049939	Lrrc4	GO:0005488
ENSMUSG00000062933	Gm10123	GO:0005488
ENSMUSG00000039676	Capsl	GO:0005488
ENSMUSG00000018501	Ncor1	GO:0005488
ENSMUSG00000041798	Gck	GO:0005488
ENSMUSG00000031565	Fgfr1	GO:0005488
ENSMUSG00000030465	Psd3	GO:0005488
ENSMUSG00000000555	Itga5	GO:0005488
ENSMUSG00000030047	Arhgap25	GO:0005488
ENSMUSG00000050271	D8Ertd82e	GO:0005488
ENSMUSG00000035686	Thrsp	GO:0005488
ENSMUSG00000037465	Klf10	GO:0005488
ENSMUSG00000030866	Ern2	GO:0005488
ENSMUSG00000040659	Efhd2	GO:0005488
ENSMUSG00000050840	Cdh20	GO:0005488
ENSMUSG00000015143	Actn1	GO:0005488
ENSMUSG00000027318	Adam33	GO:0005488
ENSMUSG00000015002	Efr3a	GO:0005488
ENSMUSG00000015095	Fbxw5	GO:0005488
ENSMUSG00000001552	Jup	GO:0005488
ENSMUSG00000025410	Dctn2	GO:0005488
ENSMUSG00000042249	Adrbk2	GO:0005488
ENSMUSG00000039488	Cntn5	GO:0005488
ENSMUSG00000071647	Eml3	GO:0005488
ENSMUSG00000042401	Crtac1	GO:0005488
ENSMUSG00000052372	Il1rapl1	GO:0005488
ENSMUSG00000032366	Tpm1	GO:0005488
ENSMUSG00000040037	Negr1	GO:0005488
ENSMUSG00000056486	Chn1	GO:0005488
ENSMUSG00000020647	Ncoa1	GO:0005488
ENSMUSG00000053477	Tcf4	GO:0005488
ENSMUSG00000021745	Ptprg	GO:0005488
ENSMUSG00000038679	Trps1	GO:0005488
ENSMUSG00000021743	Fezf2	GO:0005488
ENSMUSG00000075224	Lrrc55	GO:0005488
ENSMUSG00000049184	Purg	GO:0005488
ENSMUSG00000059857	Ntng1	GO:0005488
ENSMUSG00000027425	Csrp2bp	GO:0005488
ENSMUSG00000050505	Pcdh20	GO:0005488
ENSMUSG00000029090	Gpr125	GO:0005488
ENSMUSG00000031633	Slc25a4	GO:0005488
ENSMUSG00000001986	Gria3	GO:0005488
ENSMUSG00000032185	Carm1	GO:0005488
ENSMUSG00000019890	Nts	GO:0005488
ENSMUSG00000021991	Cacna2d3	GO:0005488
ENSMUSG00000017376	Nlk	GO:0005488
ENSMUSG00000040724	Kcna2	GO:0005488
ENSMUSG00000024424	Ttc39c	GO:0005488
ENSMUSG00000032261	Sh3bgrl2	GO:0005488
ENSMUSG00000024421	Lama3	GO:0005488
ENSMUSG00000022285	Ywhaz	GO:0005488
ENSMUSG00000007041	Clic1	GO:0005488
ENSMUSG00000025810	Nrp1	GO:0005488
ENSMUSG00000005087	Cd44	GO:0005488
ENSMUSG00000038205	Prkab2	GO:0005488
ENSMUSG00000021822	Plau	GO:0005488
ENSMUSG00000058740	Kcnt1	GO:0005488
ENSMUSG00000036264	Fstl4	GO:0005488
ENSMUSG00000022512	Cldn1	GO:0005488
ENSMUSG00000022454	Nell2	GO:0005488
ENSMUSG00000020785	Camkk1	GO:0005488
ENSMUSG00000036466	Megf11	GO:0005488
ENSMUSG00000038418	Egr1	GO:0005488
ENSMUSG00000022212	Cpne6	GO:0005488
ENSMUSG00000028876	Epha10	GO:0005488
ENSMUSG00000027109	Sp3	GO:0005488
ENSMUSG00000037605	Lphn3	GO:0005488
ENSMUSG00000021728	Emb	GO:0005488
ENSMUSG00000090061	3110047P20Rik	GO:0005488
ENSMUSG00000036834	Plch1	GO:0005488
ENSMUSG00000069171	Nr2f1	GO:0005488
ENSMUSG00000016200	Syt14	GO:0005488
ENSMUSG00000040420	Cdh18	GO:0005488
ENSMUSG00000059974	Ntm	GO:0005488
ENSMUSG00000041695	Kcnj2	GO:0005488
ENSMUSG00000025372	Baiap2	GO:0005488
ENSMUSG00000066392	Nrxn3	GO:0005488
ENSMUSG00000024955	Esrra	GO:0005488
ENSMUSG00000016382	Pls3	GO:0005488
ENSMUSG00000027210	Meis2	GO:0005488
ENSMUSG00000041624	Gucy1a2	GO:0005488
ENSMUSG00000045083	Lingo2	GO:0005488
ENSMUSG00000035566	Pcdh17	GO:0005488
ENSMUSG00000048279	Sacs	GO:0005488
ENSMUSG00000025085	Ablim1	GO:0005488
ENSMUSG00000006154	Eps8l1	GO:0005488
ENSMUSG00000010086	Rnf112	GO:0005488
ENSMUSG00000033730	Egr3	GO:0005488
ENSMUSG00000022340	Sybu	GO:0005488
ENSMUSG00000021700	Rab3c	GO:0005488
ENSMUSG00000026489	Adck3	GO:0005488
ENSMUSG00000028351	Dbc1	GO:0005488
ENSMUSG00000030104	Edem1	GO:0005488
ENSMUSG00000016494	Cd34	GO:0005488
ENSMUSG00000031453	Rasa3	GO:0005488
ENSMUSG00000027674	Pex5l	GO:0005488
ENSMUSG00000028909	Ptpru	GO:0005488
ENSMUSG00000027996	Sfrp2	GO:0005488
ENSMUSG00000030854	Ptpn5	GO:0005488
ENSMUSG00000030428	Ttyh1	GO:0005488
ENSMUSG00000019467	Arhgef25	GO:0005488
ENSMUSG00000016150	Odz1	GO:0005488
ENSMUSG00000026077	Npas2	GO:0005488
ENSMUSG00000022105	Rb1	GO:0005488
ENSMUSG00000020601	Trib2	GO:0005488
ENSMUSG00000028224	Nbn	GO:0005488
ENSMUSG00000024074	Crim1	GO:0005488
ENSMUSG00000028226	Mmp16	GO:0005488
ENSMUSG00000028222	Calb1	GO:0005488
ENSMUSG00000063531	Sema3e	GO:0005488
ENSMUSG00000021559	Dapk1	GO:0005488
ENSMUSG00000030350	Prmt8	GO:0005488
ENSMUSG00000037872	Darc	GO:0005488
ENSMUSG00000017639	Rab11fip4	GO:0005488
ENSMUSG00000031772	Cntnap4	GO:0005488
ENSMUSG00000019997	Ctgf	GO:0005488
ENSMUSG00000017631	Abr	GO:0005488
ENSMUSG00000002799	Jag2	GO:0005488
ENSMUSG00000031673	Cdh11	GO:0005488
ENSMUSG00000031672	Got2	GO:0005488
ENSMUSG00000066406	Akap13	GO:0005488
ENSMUSG00000044933	Sstr3	GO:0005488
ENSMUSG00000032036	Kirrel3	GO:0005488
ENSMUSG00000051391	Ywhag	GO:0005488
ENSMUSG00000019966	Kitl	GO:0005488
ENSMUSG00000074505	Fat3	GO:0005488
ENSMUSG00000033953	Ppp3r1	GO:0005488
ENSMUSG00000011752	Pgam1	GO:0005488
ENSMUSG00000019843	Fyn	GO:0005488
ENSMUSG00000000766	Oprm1	GO:0005488
ENSMUSG00000050963	Kcns2	GO:0005488
ENSMUSG00000038128	Camk4	GO:0005488
ENSMUSG00000022790	Igsf11	GO:0005488
ENSMUSG00000039936	Pik3cd	GO:0005488
ENSMUSG00000026959	Grin1	GO:0005488
ENSMUSG00000029832	Nfe2l3	GO:0005488
ENSMUSG00000060534	Dcc	GO:0005488
ENSMUSG00000028830	AU040320	GO:0005488
ENSMUSG00000028833	Ncdn	GO:0005488
ENSMUSG00000034648	Lrrn1	GO:0005488
ENSMUSG00000029359	Tesc	GO:0005488
ENSMUSG00000035199	Arl6ip5	GO:0005488
ENSMUSG00000021125	Arg2	GO:0005488
ENSMUSG00000021978	Extl3	GO:0005488
ENSMUSG00000020431	Adcy1	GO:0005488
ENSMUSG00000021687	Scamp1	GO:0005488
ENSMUSG00000060126	Tpt1	GO:0005488
ENSMUSG00000027712	Anxa5	GO:0005488
ENSMUSG00000033557	Fam20b	GO:0005488
ENSMUSG00000027489	Necab3	GO:0005488
ENSMUSG00000000247	Lhx2	GO:0005488
ENSMUSG00000034220	Gpc1	GO:0005488
ENSMUSG00000030600	Lrfn1	GO:0005488
ENSMUSG00000054263	Lifr	GO:0005488
ENSMUSG00000033434	Gtpbp6	GO:0005488
ENSMUSG00000048482	Bdnf	GO:0005488
ENSMUSG00000019769	Syne1	GO:0005488
ENSMUSG00000027254	Mtap1a	GO:0005488
ENSMUSG00000035357	Pdzrn3	GO:0005488
ENSMUSG00000024594	Prrc1	GO:0005488
ENSMUSG00000003746	Man1a	GO:0005488
ENSMUSG00000037984	Neurod6	GO:0005488
ENSMUSG00000008575	Nfib	GO:0005488
ENSMUSG00000025020	Slit1	GO:0005488
ENSMUSG00000028399	Ptprd	GO:0005488
ENSMUSG00000049907	Rasl11b	GO:0005488
ENSMUSG00000026259	Ngef	GO:0005488
ENSMUSG00000022055	Nefl	GO:0005488
ENSMUSG00000041710	Trpc5	GO:0005488
ENSMUSG00000052560	Cpne8	GO:0005488
ENSMUSG00000028946	Hes3	GO:0005488
ENSMUSG00000016346	Kcnq2	GO:0005488
ENSMUSG00000030075	Cntn3	GO:0005488
ENSMUSG00000035513	Ntng2	GO:0005488
ENSMUSG00000026235	Epha4	GO:0005488
ENSMUSG00000030067	Foxp1	GO:0005488
ENSMUSG00000032307	Ube2q2	GO:0005488
ENSMUSG00000007817	Zmiz1	GO:0005488
ENSMUSG00000043811	Rtn4r	GO:0005488
ENSMUSG00000059203	Il1rapl2	GO:0005488
ENSMUSG00000046719	Nxph3	GO:0005488
ENSMUSG00000004151	Etv1	GO:0005488
ENSMUSG00000026193	Fn1	GO:0005488
ENSMUSG00000013089	Etv5	GO:0005488
ENSMUSG00000018322	Tomm34	GO:0005488
ENSMUSG00000040820	Hlcs	GO:0005488
ENSMUSG00000027748	Trpc4	GO:0005488
ENSMUSG00000027895	Kcnc4	GO:0005488
ENSMUSG00000040536	Necab1	GO:0005488
ENSMUSG00000032374	Plod2	GO:0005488
ENSMUSG00000002190	Clgn	GO:0005488
ENSMUSG00000031823	Zdhhc7	GO:0005488
ENSMUSG00000032174	Icam5	GO:0005488
ENSMUSG00000025969	Nrp2	GO:0005488
ENSMUSG00000021259	Cyp46a1	GO:0005488
ENSMUSG00000034171	Faah	GO:0005488
ENSMUSG00000020032	Nuak1	GO:0005488
ENSMUSG00000025422	Agap2	GO:0005488
ENSMUSG00000029168	Dpysl5	GO:0005488
ENSMUSG00000034040	Wbscr17	GO:0005488
ENSMUSG00000002900	Lamb1	GO:0005488
ENSMUSG00000036180	Gatad2a	GO:0005488
ENSMUSG00000021097	Clmn	GO:0005488
ENSMUSG00000056427	Slit3	GO:0005488
ENSMUSG00000016763	Scube1	GO:0005488
ENSMUSG00000051343	Rab11fip5	GO:0005488
ENSMUSG00000026463	Atp2b4	GO:0005488
ENSMUSG00000031841	Cdh13	GO:0005488
ENSMUSG00000049252	Lrp1b	GO:0005488
ENSMUSG00000007033	Hspa1l	GO:0005488
ENSMUSG00000020246	Hcfc2	GO:0005488
ENSMUSG00000013701	Timm23	GO:0005488
ENSMUSG00000068617	Efcab1	GO:0005488
ENSMUSG00000041119	Pde9a	GO:0005488
ENSMUSG00000027568	Ntsr1	GO:0005488
ENSMUSG00000017412	Cacnb4	GO:0005488
ENSMUSG00000030731	Syt3	GO:0005488
ENSMUSG00000016356	Col20a1	GO:0005488
ENSMUSG00000029860	Zyx	GO:0005488
ENSMUSG00000003657	Calb2	GO:0005488
ENSMUSG00000022594	Lynx1	GO:0005488
ENSMUSG00000022263	Trio	GO:0005488
ENSMUSG00000030935	Acsm3	GO:0005488
ENSMUSG00000024642	Tle4	GO:0005488
ENSMUSG00000038175	Mylip	GO:0005488
ENSMUSG00000039252	Lgi2	GO:0005488
ENSMUSG00000026767	Fam188a	GO:0005488
ENSMUSG00000029467	Atp2a2	GO:0005488
ENSMUSG00000039156	Stim2	GO:0005488
ENSMUSG00000030123	Plxnd1	GO:0005488
ENSMUSG00000012819	Cdh23	GO:0005488
ENSMUSG00000045658	Pid1	GO:0005488
ENSMUSG00000059409	Ppp2r5d	GO:0005488
ENSMUSG00000034796	Cpne7	GO:0005488
ENSMUSG00000035954	Dock4	GO:0005488
ENSMUSG00000041592	Sdk2	GO:0005488
ENSMUSG00000023019	Gpd1	GO:0005488
ENSMUSG00000028161	Ppp3ca	GO:0005488
ENSMUSG00000035653	Lrfn5	GO:0005488
ENSMUSG00000024897	Apba1	GO:0005488
ENSMUSG00000030226	Lmo3	GO:0005488
ENSMUSG00000041417	Pik3r1	GO:0035004
ENSMUSG00000039936	Pik3cd	GO:0035004
ENSMUSG00000023927	Satb1	GO:0046651
ENSMUSG00000044813	Shb	GO:0046651
ENSMUSG00000005583	Mef2c	GO:0046651
ENSMUSG00000027985	Lef1	GO:0046651
ENSMUSG00000019843	Fyn	GO:0046651
ENSMUSG00000040495	Chrm4	GO:0035556
ENSMUSG00000042429	Adora1	GO:0035556
ENSMUSG00000022861	Dgkg	GO:0035556
ENSMUSG00000053310	Nrgn	GO:0035556
ENSMUSG00000046159	Chrm3	GO:0035556
ENSMUSG00000007989	Fzd3	GO:0035556
ENSMUSG00000026185	Igfbp5	GO:0035556
ENSMUSG00000009647	Ccdc109a	GO:0035556
ENSMUSG00000027784	Ppm1l	GO:0035556
ENSMUSG00000001985	Grik3	GO:0035556
ENSMUSG00000005580	Adcy9	GO:0035556
ENSMUSG00000005583	Mef2c	GO:0035556
ENSMUSG00000062232	Rapgef2	GO:0035556
ENSMUSG00000021478	Drd1a	GO:0035556
ENSMUSG00000041417	Pik3r1	GO:0035556
ENSMUSG00000021772	Nkiras1	GO:0035556
ENSMUSG00000078816	Prkcc	GO:0035556
ENSMUSG00000032470	Mras	GO:0035556
ENSMUSG00000036095	Dgkb	GO:0035556
ENSMUSG00000033307	Mif	GO:0035556
ENSMUSG00000040125	Gpr26	GO:0035556
ENSMUSG00000001642	Akr1b3	GO:0035556
ENSMUSG00000027500	Stmn2	GO:0035556
ENSMUSG00000022376	Adcy8	GO:0035556
ENSMUSG00000027297	Ltk	GO:0035556
ENSMUSG00000034472	Rasd2	GO:0035556
ENSMUSG00000023192	Grm2	GO:0035556
ENSMUSG00000050965	Prkca	GO:0035556
ENSMUSG00000032356	Rasgrf1	GO:0035556
ENSMUSG00000031328	Flna	GO:0035556
ENSMUSG00000062604	Srpk2	GO:0035556
ENSMUSG00000032549	Rab6b	GO:0035556
ENSMUSG00000032946	Rasgrp2	GO:0035556
ENSMUSG00000034009	Rxfp1	GO:0035556
ENSMUSG00000029333	Rasgef1b	GO:0035556
ENSMUSG00000022419	Deptor	GO:0035556
ENSMUSG00000041798	Gck	GO:0035556
ENSMUSG00000030465	Psd3	GO:0035556
ENSMUSG00000056486	Chn1	GO:0035556
ENSMUSG00000017376	Nlk	GO:0035556
ENSMUSG00000038020	Rapgefl1	GO:0035556
ENSMUSG00000036834	Plch1	GO:0035556
ENSMUSG00000025372	Baiap2	GO:0035556
ENSMUSG00000041624	Gucy1a2	GO:0035556
ENSMUSG00000006154	Eps8l1	GO:0035556
ENSMUSG00000021700	Rab3c	GO:0035556
ENSMUSG00000031453	Rasa3	GO:0035556
ENSMUSG00000022105	Rb1	GO:0035556
ENSMUSG00000087141	Plcxd2	GO:0035556
ENSMUSG00000021559	Dapk1	GO:0035556
ENSMUSG00000019997	Ctgf	GO:0035556
ENSMUSG00000017631	Abr	GO:0035556
ENSMUSG00000066406	Akap13	GO:0035556
ENSMUSG00000000766	Oprm1	GO:0035556
ENSMUSG00000039936	Pik3cd	GO:0035556
ENSMUSG00000020431	Adcy1	GO:0035556
ENSMUSG00000049907	Rasl11b	GO:0035556
ENSMUSG00000025422	Agap2	GO:0035556
ENSMUSG00000031841	Cdh13	GO:0035556
ENSMUSG00000033307	Mif	GO:0072331
ENSMUSG00000054814	Usp46	GO:0050789
ENSMUSG00000002010	Idh3g	GO:0050789
ENSMUSG00000047907	Tshz2	GO:0050789
ENSMUSG00000023927	Satb1	GO:0050789
ENSMUSG00000005610	Eif4g2	GO:0050789
ENSMUSG00000006818	Sod2	GO:0050789
ENSMUSG00000030189	Csda	GO:0050789
ENSMUSG00000028931	Kcnab2	GO:0050789
ENSMUSG00000035131	Fam5c	GO:0050789
ENSMUSG00000032336	Nptn	GO:0050789
ENSMUSG00000035033	Tbr1	GO:0050789
ENSMUSG00000033863	Klf9	GO:0050789
ENSMUSG00000048078	Odz4	GO:0050789
ENSMUSG00000021217	Tshz3	GO:0050789
ENSMUSG00000040495	Chrm4	GO:0050789
ENSMUSG00000019986	Ahi1	GO:0050789
ENSMUSG00000042429	Adora1	GO:0050789
ENSMUSG00000078566	Bnip3	GO:0050789
ENSMUSG00000021814	Anxa7	GO:0050789
ENSMUSG00000019852	D10Bwg1379e	GO:0050789
ENSMUSG00000018589	Glra2	GO:0050789
ENSMUSG00000042834	D0H4S114	GO:0050789
ENSMUSG00000031169	Porcn	GO:0050789
ENSMUSG00000058927	Gm10053	GO:0050789
ENSMUSG00000044216	Kcnj4	GO:0050789
ENSMUSG00000063887	Nlgn1	GO:0050789
ENSMUSG00000022309	Angpt1	GO:0050789
ENSMUSG00000022306	Zfpm2	GO:0050789
ENSMUSG00000001175	Calm1	GO:0050789
ENSMUSG00000037710	Cisd1	GO:0050789
ENSMUSG00000039579	Grin3a	GO:0050789
ENSMUSG00000006958	Chrd	GO:0050789
ENSMUSG00000039474	Wfs1	GO:0050789
ENSMUSG00000057236	Rbbp4	GO:0050789
ENSMUSG00000026837	Col5a1	GO:0050789
ENSMUSG00000020402	Vdac1	GO:0050789
ENSMUSG00000058400	Qrfpr	GO:0050789
ENSMUSG00000036766	Dner	GO:0050789
ENSMUSG00000029223	Uchl1	GO:0050789
ENSMUSG00000048799	Cep120	GO:0050789
ENSMUSG00000024617	Camk2a	GO:0050789
ENSMUSG00000022861	Dgkg	GO:0050789
ENSMUSG00000048490	Nrip1	GO:0050789
ENSMUSG00000020964	Sel1l	GO:0050789
ENSMUSG00000053310	Nrgn	GO:0050789
ENSMUSG00000059040	Gm5506	GO:0050789
ENSMUSG00000039714	Cplx3	GO:0050789
ENSMUSG00000037362	Nov	GO:0050789
ENSMUSG00000046159	Chrm3	GO:0050789
ENSMUSG00000043301	Kcnj6	GO:0050789
ENSMUSG00000046480	Scn4b	GO:0050789
ENSMUSG00000045967	Gpr158	GO:0050789
ENSMUSG00000033377	Palmd	GO:0050789
ENSMUSG00000027330	Cdc25b	GO:0050789
ENSMUSG00000027335	Adra1d	GO:0050789
ENSMUSG00000042453	Reln	GO:0050789
ENSMUSG00000026204	Ptprn	GO:0050789
ENSMUSG00000019433	Gipc1	GO:0050789
ENSMUSG00000071866	Ppia	GO:0050789
ENSMUSG00000048138	Dmrt2	GO:0050789
ENSMUSG00000038967	Pdk2	GO:0050789
ENSMUSG00000007989	Fzd3	GO:0050789
ENSMUSG00000004637	Wwox	GO:0050789
ENSMUSG00000026185	Igfbp5	GO:0050789
ENSMUSG00000000440	Pparg	GO:0050789
ENSMUSG00000066456	Hmgn3	GO:0050789
ENSMUSG00000039782	Cpeb2	GO:0050789
ENSMUSG00000025876	Unc5a	GO:0050789
ENSMUSG00000062077	Trim54	GO:0050789
ENSMUSG00000052920	Prkg1	GO:0050789
ENSMUSG00000052928	Ctif	GO:0050789
ENSMUSG00000068696	Gpr88	GO:0050789
ENSMUSG00000023944	Hsp90ab1	GO:0050789
ENSMUSG00000053819	Camk2d	GO:0050789
ENSMUSG00000022054	Nefm	GO:0050789
ENSMUSG00000032528	Vipr1	GO:0050789
ENSMUSG00000025432	Avil	GO:0050789
ENSMUSG00000025402	Nab2	GO:0050789
ENSMUSG00000009647	Ccdc109a	GO:0050789
ENSMUSG00000026872	Zeb2	GO:0050789
ENSMUSG00000022377	Asap1	GO:0050789
ENSMUSG00000003099	Ppp5c	GO:0050789
ENSMUSG00000029174	Tbc1d1	GO:0050789
ENSMUSG00000032238	Rora	GO:0050789
ENSMUSG00000030905	Crym	GO:0050789
ENSMUSG00000025277	Abhd6	GO:0050789
ENSMUSG00000040363	Bcor	GO:0050789
ENSMUSG00000027784	Ppm1l	GO:0050789
ENSMUSG00000018965	Ywhah	GO:0050789
ENSMUSG00000048251	Bcl11b	GO:0050789
ENSMUSG00000069106	Gm8910	GO:0050789
ENSMUSG00000039145	Camk1d	GO:0050789
ENSMUSG00000023830	Igf2r	GO:0050789
ENSMUSG00000001911	Nfix	GO:0050789
ENSMUSG00000036438	Calm2	GO:0050789
ENSMUSG00000001985	Grik3	GO:0050789
ENSMUSG00000042604	Kcna4	GO:0050789
ENSMUSG00000027273	Snap25	GO:0050789
ENSMUSG00000005580	Adcy9	GO:0050789
ENSMUSG00000005583	Mef2c	GO:0050789
ENSMUSG00000038860	Garnl3	GO:0050789
ENSMUSG00000030474	Siglece	GO:0050789
ENSMUSG00000092083	Kcnb2	GO:0050789
ENSMUSG00000055540	Epha6	GO:0050789
ENSMUSG00000026155	Smap1	GO:0050789
ENSMUSG00000041468	Gpr12	GO:0050789
ENSMUSG00000055447	Cd47	GO:0050789
ENSMUSG00000062232	Rapgef2	GO:0050789
ENSMUSG00000041936	Agrn	GO:0050789
ENSMUSG00000024052	Lpin2	GO:0050789
ENSMUSG00000021478	Drd1a	GO:0050789
ENSMUSG00000059173	Pde1a	GO:0050789
ENSMUSG00000051367	Six1	GO:0050789
ENSMUSG00000063694	Cycs	GO:0050789
ENSMUSG00000073433	Arhgdig	GO:0050789
ENSMUSG00000030283	St8sia1	GO:0050789
ENSMUSG00000041556	Fbxo2	GO:0050789
ENSMUSG00000041417	Pik3r1	GO:0050789
ENSMUSG00000027009	Itga4	GO:0050789
ENSMUSG00000075334	Rprm	GO:0050789
ENSMUSG00000021772	Nkiras1	GO:0050789
ENSMUSG00000037126	Psd	GO:0050789
ENSMUSG00000025946	Pth2r	GO:0050789
ENSMUSG00000055653	Gpc3	GO:0050789
ENSMUSG00000048915	Efna5	GO:0050789
ENSMUSG00000078816	Prkcc	GO:0050789
ENSMUSG00000064043	Trerf1	GO:0050789
ENSMUSG00000019889	Ptprk	GO:0050789
ENSMUSG00000032470	Mras	GO:0050789
ENSMUSG00000036095	Dgkb	GO:0050789
ENSMUSG00000033307	Mif	GO:0050789
ENSMUSG00000053004	Hrh1	GO:0050789
ENSMUSG00000054693	Adam10	GO:0050789
ENSMUSG00000040125	Gpr26	GO:0050789
ENSMUSG00000021598	Med10	GO:0050789
ENSMUSG00000047139	Cd24a	GO:0050789
ENSMUSG00000053395	Cacng8	GO:0050789
ENSMUSG00000032875	Arhgef17	GO:0050789
ENSMUSG00000026841	Fibcd1	GO:0050789
ENSMUSG00000036473	Tbc1d24	GO:0050789
ENSMUSG00000021591	Glrx	GO:0050789
ENSMUSG00000079037	Prnp	GO:0050789
ENSMUSG00000025892	Gria4	GO:0050789
ENSMUSG00000001642	Akr1b3	GO:0050789
ENSMUSG00000028864	Hgf	GO:0050789
ENSMUSG00000029392	Rilpl1	GO:0050789
ENSMUSG00000049107	Ntf3	GO:0050789
ENSMUSG00000027500	Stmn2	GO:0050789
ENSMUSG00000020704	Accn1	GO:0050789
ENSMUSG00000068747	Sort1	GO:0050789
ENSMUSG00000022376	Adcy8	GO:0050789
ENSMUSG00000027297	Ltk	GO:0050789
ENSMUSG00000023972	Ptk7	GO:0050789
ENSMUSG00000028565	Nfia	GO:0050789
ENSMUSG00000033055	Ankrd54	GO:0050789
ENSMUSG00000027223	Mapk8ip1	GO:0050789
ENSMUSG00000036578	Fxyd7	GO:0050789
ENSMUSG00000039278	Pcsk1n	GO:0050789
ENSMUSG00000034472	Rasd2	GO:0050789
ENSMUSG00000023232	Serinc2	GO:0050789
ENSMUSG00000023192	Grm2	GO:0050789
ENSMUSG00000021730	Hcn1	GO:0050789
ENSMUSG00000008305	Tle1	GO:0050789
ENSMUSG00000038976	Ppp1r9b	GO:0050789
ENSMUSG00000016664	Pacsin2	GO:0050789
ENSMUSG00000025475	Gpr123	GO:0050789
ENSMUSG00000031530	Dusp4	GO:0050789
ENSMUSG00000027985	Lef1	GO:0050789
ENSMUSG00000017167	Cntnap1	GO:0050789
ENSMUSG00000026103	Gls	GO:0050789
ENSMUSG00000050965	Prkca	GO:0050789
ENSMUSG00000032356	Rasgrf1	GO:0050789
ENSMUSG00000003814	Calr	GO:0050789
ENSMUSG00000020277	Pfkl	GO:0050789
ENSMUSG00000021270	Hsp90aa1	GO:0050789
ENSMUSG00000063524	Eno1	GO:0050789
ENSMUSG00000074575	Kcng1	GO:0050789
ENSMUSG00000018476	Kdm6b	GO:0050789
ENSMUSG00000028488	Sh3gl2	GO:0050789
ENSMUSG00000024517	Grp	GO:0050789
ENSMUSG00000049176	Frmpd4	GO:0050789
ENSMUSG00000031328	Flna	GO:0050789
ENSMUSG00000032532	Cck	GO:0050789
ENSMUSG00000044783	Hjurp	GO:0050789
ENSMUSG00000074227	Spint2	GO:0050789
ENSMUSG00000051920	Rspo2	GO:0050789
ENSMUSG00000062604	Srpk2	GO:0050789
ENSMUSG00000019370	Calm3	GO:0050789
ENSMUSG00000021314	Amph	GO:0050789
ENSMUSG00000038255	Neurod2	GO:0050789
ENSMUSG00000038256	Bcl9	GO:0050789
ENSMUSG00000020458	Rtn4	GO:0050789
ENSMUSG00000003378	Grik5	GO:0050789
ENSMUSG00000029207	Apbb2	GO:0050789
ENSMUSG00000057715	A830018L16Rik	GO:0050789
ENSMUSG00000029103	Lrpap1	GO:0050789
ENSMUSG00000029101	Rgs12	GO:0050789
ENSMUSG00000032549	Rab6b	GO:0050789
ENSMUSG00000064293	Cntn4	GO:0050789
ENSMUSG00000032826	Ank2	GO:0050789
ENSMUSG00000032946	Rasgrp2	GO:0050789
ENSMUSG00000034009	Rxfp1	GO:0050789
ENSMUSG00000042589	Cux2	GO:0050789
ENSMUSG00000029333	Rasgef1b	GO:0050789
ENSMUSG00000022416	Cacna1i	GO:0050789
ENSMUSG00000022419	Deptor	GO:0050789
ENSMUSG00000036545	Adamts2	GO:0050789
ENSMUSG00000018909	Arrb1	GO:0050789
ENSMUSG00000052504	Epha3	GO:0050789
ENSMUSG00000037996	Slc24a2	GO:0050789
ENSMUSG00000032482	Cspg5	GO:0050789
ENSMUSG00000062933	Gm10123	GO:0050789
ENSMUSG00000018501	Ncor1	GO:0050789
ENSMUSG00000041798	Gck	GO:0050789
ENSMUSG00000031565	Fgfr1	GO:0050789
ENSMUSG00000030465	Psd3	GO:0050789
ENSMUSG00000000555	Itga5	GO:0050789
ENSMUSG00000030047	Arhgap25	GO:0050789
ENSMUSG00000034981	Parm1	GO:0050789
ENSMUSG00000035686	Thrsp	GO:0050789
ENSMUSG00000037465	Klf10	GO:0050789
ENSMUSG00000030866	Ern2	GO:0050789
ENSMUSG00000015143	Actn1	GO:0050789
ENSMUSG00000027318	Adam33	GO:0050789
ENSMUSG00000001552	Jup	GO:0050789
ENSMUSG00000042249	Adrbk2	GO:0050789
ENSMUSG00000052372	Il1rapl1	GO:0050789
ENSMUSG00000032366	Tpm1	GO:0050789
ENSMUSG00000056486	Chn1	GO:0050789
ENSMUSG00000020647	Ncoa1	GO:0050789
ENSMUSG00000053477	Tcf4	GO:0050789
ENSMUSG00000021745	Ptprg	GO:0050789
ENSMUSG00000038679	Trps1	GO:0050789
ENSMUSG00000021743	Fezf2	GO:0050789
ENSMUSG00000029090	Gpr125	GO:0050789
ENSMUSG00000031633	Slc25a4	GO:0050789
ENSMUSG00000001986	Gria3	GO:0050789
ENSMUSG00000032185	Carm1	GO:0050789
ENSMUSG00000021991	Cacna2d3	GO:0050789
ENSMUSG00000017376	Nlk	GO:0050789
ENSMUSG00000040724	Kcna2	GO:0050789
ENSMUSG00000032261	Sh3bgrl2	GO:0050789
ENSMUSG00000024421	Lama3	GO:0050789
ENSMUSG00000007041	Clic1	GO:0050789
ENSMUSG00000025810	Nrp1	GO:0050789
ENSMUSG00000005087	Cd44	GO:0050789
ENSMUSG00000021822	Plau	GO:0050789
ENSMUSG00000070509	Rgma	GO:0050789
ENSMUSG00000022454	Nell2	GO:0050789
ENSMUSG00000020785	Camkk1	GO:0050789
ENSMUSG00000038418	Egr1	GO:0050789
ENSMUSG00000057193	Slc44a2	GO:0050789
ENSMUSG00000038020	Rapgefl1	GO:0050789
ENSMUSG00000028876	Epha10	GO:0050789
ENSMUSG00000027109	Sp3	GO:0050789
ENSMUSG00000037605	Lphn3	GO:0050789
ENSMUSG00000029385	Ccng2	GO:0050789
ENSMUSG00000036834	Plch1	GO:0050789
ENSMUSG00000069171	Nr2f1	GO:0050789
ENSMUSG00000061576	Dpp6	GO:0050789
ENSMUSG00000059974	Ntm	GO:0050789
ENSMUSG00000041695	Kcnj2	GO:0050789
ENSMUSG00000025372	Baiap2	GO:0050789
ENSMUSG00000024955	Esrra	GO:0050789
ENSMUSG00000037788	Vopp1	GO:0050789
ENSMUSG00000027210	Meis2	GO:0050789
ENSMUSG00000041624	Gucy1a2	GO:0050789
ENSMUSG00000048279	Sacs	GO:0050789
ENSMUSG00000025085	Ablim1	GO:0050789
ENSMUSG00000006154	Eps8l1	GO:0050789
ENSMUSG00000004031	Fam5b	GO:0050789
ENSMUSG00000033730	Egr3	GO:0050789
ENSMUSG00000021700	Rab3c	GO:0050789
ENSMUSG00000028351	Dbc1	GO:0050789
ENSMUSG00000031453	Rasa3	GO:0050789
ENSMUSG00000027674	Pex5l	GO:0050789
ENSMUSG00000028909	Ptpru	GO:0050789
ENSMUSG00000027996	Sfrp2	GO:0050789
ENSMUSG00000019467	Arhgef25	GO:0050789
ENSMUSG00000016150	Odz1	GO:0050789
ENSMUSG00000026077	Npas2	GO:0050789
ENSMUSG00000022105	Rb1	GO:0050789
ENSMUSG00000020601	Trib2	GO:0050789
ENSMUSG00000028224	Nbn	GO:0050789
ENSMUSG00000024074	Crim1	GO:0050789
ENSMUSG00000028222	Calb1	GO:0050789
ENSMUSG00000087141	Plcxd2	GO:0050789
ENSMUSG00000021559	Dapk1	GO:0050789
ENSMUSG00000037872	Darc	GO:0050789
ENSMUSG00000031772	Cntnap4	GO:0050789
ENSMUSG00000019997	Ctgf	GO:0050789
ENSMUSG00000017631	Abr	GO:0050789
ENSMUSG00000002799	Jag2	GO:0050789
ENSMUSG00000036357	Gpr101	GO:0050789
ENSMUSG00000066406	Akap13	GO:0050789
ENSMUSG00000044933	Sstr3	GO:0050789
ENSMUSG00000051391	Ywhag	GO:0050789
ENSMUSG00000019966	Kitl	GO:0050789
ENSMUSG00000011752	Pgam1	GO:0050789
ENSMUSG00000019843	Fyn	GO:0050789
ENSMUSG00000000766	Oprm1	GO:0050789
ENSMUSG00000050963	Kcns2	GO:0050789
ENSMUSG00000038128	Camk4	GO:0050789
ENSMUSG00000022790	Igsf11	GO:0050789
ENSMUSG00000039936	Pik3cd	GO:0050789
ENSMUSG00000026959	Grin1	GO:0050789
ENSMUSG00000029832	Nfe2l3	GO:0050789
ENSMUSG00000060534	Dcc	GO:0050789
ENSMUSG00000028833	Ncdn	GO:0050789
ENSMUSG00000029359	Tesc	GO:0050789
ENSMUSG00000035199	Arl6ip5	GO:0050789
ENSMUSG00000021125	Arg2	GO:0050789
ENSMUSG00000021978	Extl3	GO:0050789
ENSMUSG00000020431	Adcy1	GO:0050789
ENSMUSG00000060126	Tpt1	GO:0050789
ENSMUSG00000027712	Anxa5	GO:0050789
ENSMUSG00000027489	Necab3	GO:0050789
ENSMUSG00000000247	Lhx2	GO:0050789
ENSMUSG00000054263	Lifr	GO:0050789
ENSMUSG00000048482	Bdnf	GO:0050789
ENSMUSG00000019769	Syne1	GO:0050789
ENSMUSG00000027254	Mtap1a	GO:0050789
ENSMUSG00000037984	Neurod6	GO:0050789
ENSMUSG00000008575	Nfib	GO:0050789
ENSMUSG00000025020	Slit1	GO:0050789
ENSMUSG00000034850	Tmem127	GO:0050789
ENSMUSG00000049907	Rasl11b	GO:0050789
ENSMUSG00000026259	Ngef	GO:0050789
ENSMUSG00000022055	Nefl	GO:0050789
ENSMUSG00000028946	Hes3	GO:0050789
ENSMUSG00000016346	Kcnq2	GO:0050789
ENSMUSG00000026235	Epha4	GO:0050789
ENSMUSG00000030067	Foxp1	GO:0050789
ENSMUSG00000007817	Zmiz1	GO:0050789
ENSMUSG00000059203	Il1rapl2	GO:0050789
ENSMUSG00000004151	Etv1	GO:0050789
ENSMUSG00000026193	Fn1	GO:0050789
ENSMUSG00000013089	Etv5	GO:0050789
ENSMUSG00000027748	Trpc4	GO:0050789
ENSMUSG00000027895	Kcnc4	GO:0050789
ENSMUSG00000025969	Nrp2	GO:0050789
ENSMUSG00000020032	Nuak1	GO:0050789
ENSMUSG00000025422	Agap2	GO:0050789
ENSMUSG00000002900	Lamb1	GO:0050789
ENSMUSG00000036180	Gatad2a	GO:0050789
ENSMUSG00000056427	Slit3	GO:0050789
ENSMUSG00000031841	Cdh13	GO:0050789
ENSMUSG00000020246	Hcfc2	GO:0050789
ENSMUSG00000041119	Pde9a	GO:0050789
ENSMUSG00000027568	Ntsr1	GO:0050789
ENSMUSG00000017412	Cacnb4	GO:0050789
ENSMUSG00000022263	Trio	GO:0050789
ENSMUSG00000024642	Tle4	GO:0050789
ENSMUSG00000038175	Mylip	GO:0050789
ENSMUSG00000066189	Cacng3	GO:0050789
ENSMUSG00000048240	Gng7	GO:0050789
ENSMUSG00000038530	Rgs4	GO:0050789
ENSMUSG00000029467	Atp2a2	GO:0050789
ENSMUSG00000039156	Stim2	GO:0050789
ENSMUSG00000030123	Plxnd1	GO:0050789
ENSMUSG00000045658	Pid1	GO:0050789
ENSMUSG00000059409	Ppp2r5d	GO:0050789
ENSMUSG00000035954	Dock4	GO:0050789
ENSMUSG00000028161	Ppp3ca	GO:0050789
ENSMUSG00000051726	Kcnf1	GO:0050789
ENSMUSG00000024897	Apba1	GO:0050789
ENSMUSG00000030226	Lmo3	GO:0050789
ENSMUSG00000039714	Cplx3	GO:0030072
ENSMUSG00000033615	Cplx1	GO:0030072
ENSMUSG00000027273	Snap25	GO:0030072
ENSMUSG00000039714	Cplx3	GO:0030073
ENSMUSG00000033615	Cplx1	GO:0030073
ENSMUSG00000033307	Mif	GO:0002035
ENSMUSG00000006818	Sod2	GO:0042554
ENSMUSG00000025402	Nab2	GO:0042552
ENSMUSG00000049107	Ntf3	GO:0042552
ENSMUSG00000019843	Fyn	GO:0042552
ENSMUSG00000013701	Timm23	GO:0022884
ENSMUSG00000006818	Sod2	GO:0005743
ENSMUSG00000063882	Uqcrh	GO:0005743
ENSMUSG00000020402	Vdac1	GO:0005743
ENSMUSG00000002332	Dhrs1	GO:0005743
ENSMUSG00000009647	Ccdc109a	GO:0005743
ENSMUSG00000034248	Slc25a37	GO:0005743
ENSMUSG00000016319	Slc25a5	GO:0005743
ENSMUSG00000019082	Slc25a22	GO:0005743
ENSMUSG00000035885	Cox8a	GO:0005743
ENSMUSG00000031633	Slc25a4	GO:0005743
ENSMUSG00000029153	Ociad2	GO:0005743
ENSMUSG00000034566	Atp5h	GO:0005743
ENSMUSG00000027282	Mtch2	GO:0005743
ENSMUSG00000027673	Ndufb5	GO:0005743
ENSMUSG00000031672	Got2	GO:0005743
ENSMUSG00000013701	Timm23	GO:0005743
ENSMUSG00000029359	Tesc	GO:0006883
ENSMUSG00000026235	Epha4	GO:0021957
ENSMUSG00000029009	Mthfr	GO:0042558
ENSMUSG00000023019	Gpd1	GO:0006116
ENSMUSG00000022707	Gbe1	GO:0006112
ENSMUSG00000041798	Gck	GO:0006112
ENSMUSG00000069106	Gm8910	GO:0006110
ENSMUSG00000033307	Mif	GO:0006110
ENSMUSG00000018501	Ncor1	GO:0006110
ENSMUSG00000041798	Gck	GO:0006110
ENSMUSG00000011752	Pgam1	GO:0006110
ENSMUSG00000041798	Gck	GO:0006111
ENSMUSG00000026077	Npas2	GO:0051879
ENSMUSG00000026077	Npas2	GO:0045475
ENSMUSG00000018909	Arrb1	GO:0043149
ENSMUSG00000004637	Wwox	GO:0048705
ENSMUSG00000005583	Mef2c	GO:0048705
ENSMUSG00000051367	Six1	GO:0048705
ENSMUSG00000006818	Sod2	GO:0007626
ENSMUSG00000029223	Uchl1	GO:0007626
ENSMUSG00000046230	Vps13a	GO:0007626
ENSMUSG00000042453	Reln	GO:0007626
ENSMUSG00000021478	Drd1a	GO:0007626
ENSMUSG00000034472	Rasd2	GO:0007626
ENSMUSG00000021743	Fezf2	GO:0007626
ENSMUSG00000026077	Npas2	GO:0007626
ENSMUSG00000028222	Calb1	GO:0007626
ENSMUSG00000000766	Oprm1	GO:0007626
ENSMUSG00000026959	Grin1	GO:0007626
ENSMUSG00000026235	Epha4	GO:0007626
ENSMUSG00000027568	Ntsr1	GO:0007626
ENSMUSG00000017412	Cacnb4	GO:0007626
ENSMUSG00000048240	Gng7	GO:0007626
ENSMUSG00000012819	Cdh23	GO:0007626
ENSMUSG00000024897	Apba1	GO:0007626
ENSMUSG00000021478	Drd1a	GO:0007625
ENSMUSG00000024713	Pcsk5	GO:0048706
ENSMUSG00000061731	Ext1	GO:0048706
ENSMUSG00000027109	Sp3	GO:0048706
ENSMUSG00000042429	Adora1	GO:0007623
ENSMUSG00000021478	Drd1a	GO:0007623
ENSMUSG00000046321	Hs3st2	GO:0007623
ENSMUSG00000018501	Ncor1	GO:0007623
ENSMUSG00000026077	Npas2	GO:0007623
ENSMUSG00000020431	Adcy1	GO:0007623
ENSMUSG00000042429	Adora1	GO:0006629
ENSMUSG00000019359	Gdpd2	GO:0006629
ENSMUSG00000026688	Mgst3	GO:0006629
ENSMUSG00000027533	Fabp5	GO:0006629
ENSMUSG00000000440	Pparg	GO:0006629
ENSMUSG00000003363	Pld3	GO:0006629
ENSMUSG00000018965	Ywhah	GO:0006629
ENSMUSG00000039037	St6galnac5	GO:0006629
ENSMUSG00000024052	Lpin2	GO:0006629
ENSMUSG00000021478	Drd1a	GO:0006629
ENSMUSG00000030283	St8sia1	GO:0006629
ENSMUSG00000041417	Pik3r1	GO:0006629
ENSMUSG00000033307	Mif	GO:0006629
ENSMUSG00000023232	Serinc2	GO:0006629
ENSMUSG00000005899	Smpd4	GO:0006629
ENSMUSG00000035686	Thrsp	GO:0006629
ENSMUSG00000026456	Cyb5r1	GO:0006629
ENSMUSG00000038205	Prkab2	GO:0006629
ENSMUSG00000036834	Plch1	GO:0006629
ENSMUSG00000037940	Inpp4b	GO:0006629
ENSMUSG00000087141	Plcxd2	GO:0006629
ENSMUSG00000021559	Dapk1	GO:0006629
ENSMUSG00000029059	2810405K02Rik	GO:0006629
ENSMUSG00000039936	Pik3cd	GO:0006629
ENSMUSG00000021259	Cyp46a1	GO:0006629
ENSMUSG00000034171	Faah	GO:0006629
ENSMUSG00000020032	Nuak1	GO:0006629
ENSMUSG00000045282	Tmem86b	GO:0006629
ENSMUSG00000035314	Gdpd5	GO:0006629
ENSMUSG00000030935	Acsm3	GO:0006629
ENSMUSG00000023019	Gpd1	GO:0006629
ENSMUSG00000005583	Mef2c	GO:0048703
ENSMUSG00000042429	Adora1	GO:0031256
ENSMUSG00000059213	Ddn	GO:0031256
ENSMUSG00000007989	Fzd3	GO:0031256
ENSMUSG00000025909	Sntg1	GO:0031256
ENSMUSG00000027356	Fermt1	GO:0031256
ENSMUSG00000027270	6330527O06Rik	GO:0031256
ENSMUSG00000019889	Ptprk	GO:0031256
ENSMUSG00000038976	Ppp1r9b	GO:0031256
ENSMUSG00000032946	Rasgrp2	GO:0031256
ENSMUSG00000000555	Itga5	GO:0031256
ENSMUSG00000032366	Tpm1	GO:0031256
ENSMUSG00000000766	Oprm1	GO:0031256
ENSMUSG00000026959	Grin1	GO:0031256
ENSMUSG00000021270	Hsp90aa1	GO:0006626
ENSMUSG00000022285	Ywhaz	GO:0006626
ENSMUSG00000018322	Tomm34	GO:0006626
ENSMUSG00000042429	Adora1	GO:0031253
ENSMUSG00000059213	Ddn	GO:0031253
ENSMUSG00000007989	Fzd3	GO:0031253
ENSMUSG00000023944	Hsp90ab1	GO:0031253
ENSMUSG00000025909	Sntg1	GO:0031253
ENSMUSG00000027356	Fermt1	GO:0031253
ENSMUSG00000027270	6330527O06Rik	GO:0031253
ENSMUSG00000047139	Cd24a	GO:0031253
ENSMUSG00000038976	Ppp1r9b	GO:0031253
ENSMUSG00000021270	Hsp90aa1	GO:0031253
ENSMUSG00000032946	Rasgrp2	GO:0031253
ENSMUSG00000000555	Itga5	GO:0031253
ENSMUSG00000032366	Tpm1	GO:0031253
ENSMUSG00000030428	Ttyh1	GO:0031253
ENSMUSG00000000766	Oprm1	GO:0031253
ENSMUSG00000026959	Grin1	GO:0031253
ENSMUSG00000032532	Cck	GO:0043203
ENSMUSG00000038418	Egr1	GO:0090192
ENSMUSG00000029223	Uchl1	GO:0007628
ENSMUSG00000021478	Drd1a	GO:0007628
ENSMUSG00000026235	Epha4	GO:0007628
ENSMUSG00000017412	Cacnb4	GO:0007628
ENSMUSG00000026202	Tuba4a	GO:0009261
ENSMUSG00000021772	Nkiras1	GO:0009261
ENSMUSG00000032470	Mras	GO:0009261
ENSMUSG00000034472	Rasd2	GO:0009261
ENSMUSG00000021270	Hsp90aa1	GO:0009261
ENSMUSG00000022066	Entpd4	GO:0009261
ENSMUSG00000032549	Rab6b	GO:0009261
ENSMUSG00000034566	Atp5h	GO:0009261
ENSMUSG00000021700	Rab3c	GO:0009261
ENSMUSG00000049907	Rasl11b	GO:0009261
ENSMUSG00000025422	Agap2	GO:0009261
ENSMUSG00000029467	Atp2a2	GO:0009261
ENSMUSG00000024782	Ak3	GO:0009260
ENSMUSG00000024566	Atp9b	GO:0009260
ENSMUSG00000025324	Atp10a	GO:0009260
ENSMUSG00000034566	Atp5h	GO:0009260
ENSMUSG00000026463	Atp2b4	GO:0009260
ENSMUSG00000029467	Atp2a2	GO:0009260
ENSMUSG00000020638	Cmpk2	GO:0009263
ENSMUSG00000024782	Ak3	GO:0009262
ENSMUSG00000032615	Nt5m	GO:0009262
ENSMUSG00000020638	Cmpk2	GO:0009262
ENSMUSG00000027533	Fabp5	GO:0042439
ENSMUSG00000032615	Nt5m	GO:0009264
ENSMUSG00000041798	Gck	GO:0009267
ENSMUSG00000042429	Adora1	GO:0009266
ENSMUSG00000000440	Pparg	GO:0009266
ENSMUSG00000030283	St8sia1	GO:0009266
ENSMUSG00000039278	Pcsk1n	GO:0009266
ENSMUSG00000026335	Pam	GO:0009268
ENSMUSG00000040363	Bcor	GO:0004842
ENSMUSG00000079557	2002-03-01	GO:0004842
ENSMUSG00000044308	Ubr3	GO:0004842
ENSMUSG00000000275	Trim25	GO:0004842
ENSMUSG00000035357	Pdzrn3	GO:0004842
ENSMUSG00000032307	Ube2q2	GO:0004842
ENSMUSG00000038175	Mylip	GO:0004842
ENSMUSG00000054814	Usp46	GO:0004843
ENSMUSG00000027996	Sfrp2	GO:2000041
ENSMUSG00000045658	Pid1	GO:0090296
ENSMUSG00000044813	Shb	GO:0030674
ENSMUSG00000022377	Asap1	GO:0030674
ENSMUSG00000018909	Arrb1	GO:0030674
ENSMUSG00000025372	Baiap2	GO:0030674
ENSMUSG00000036180	Gatad2a	GO:0030674
ENSMUSG00000027985	Lef1	GO:0002292
ENSMUSG00000037217	Syn1	GO:0030672
ENSMUSG00000021314	Amph	GO:0030672
ENSMUSG00000021687	Scamp1	GO:0030672
ENSMUSG00000070570	Slc17a7	GO:0030672
ENSMUSG00000042429	Adora1	GO:0030673
ENSMUSG00000028222	Calb1	GO:0072027
ENSMUSG00000020032	Nuak1	GO:0002039
ENSMUSG00000005583	Mef2c	GO:0001776
ENSMUSG00000039936	Pik3cd	GO:0001776
ENSMUSG00000051367	Six1	GO:0003156
ENSMUSG00000031565	Fgfr1	GO:0003156
ENSMUSG00000061731	Ext1	GO:0050508
ENSMUSG00000044783	Hjurp	GO:0034724
ENSMUSG00000019966	Kitl	GO:0033025
ENSMUSG00000031565	Fgfr1	GO:0002053
ENSMUSG00000030067	Foxp1	GO:0002053
ENSMUSG00000005583	Mef2c	GO:0034405
ENSMUSG00000055540	Epha6	GO:0005003
ENSMUSG00000052504	Epha3	GO:0005003
ENSMUSG00000028876	Epha10	GO:0005003
ENSMUSG00000026235	Epha4	GO:0005003
ENSMUSG00000046699	Slitrk4	GO:0048812
ENSMUSG00000050896	Rtn4rl2	GO:0048812
ENSMUSG00000042834	D0H4S114	GO:0048812
ENSMUSG00000029223	Uchl1	GO:0048812
ENSMUSG00000025582	Nptx1	GO:0048812
ENSMUSG00000048251	Bcl11b	GO:0048812
ENSMUSG00000027273	Snap25	GO:0048812
ENSMUSG00000017167	Cntnap1	GO:0048812
ENSMUSG00000050965	Prkca	GO:0048812
ENSMUSG00000032532	Cck	GO:0048812
ENSMUSG00000045287	Rtn4rl1	GO:0048812
ENSMUSG00000059857	Ntng1	GO:0048812
ENSMUSG00000060534	Dcc	GO:0048812
ENSMUSG00000020431	Adcy1	GO:0048812
ENSMUSG00000054263	Lifr	GO:0048812
ENSMUSG00000008575	Nfib	GO:0048812
ENSMUSG00000025020	Slit1	GO:0048812
ENSMUSG00000022055	Nefl	GO:0048812
ENSMUSG00000035513	Ntng2	GO:0048812
ENSMUSG00000026235	Epha4	GO:0048812
ENSMUSG00000039114	Nrn1	GO:0048812
ENSMUSG00000043811	Rtn4r	GO:0048812
ENSMUSG00000028876	Epha10	GO:0005005
ENSMUSG00000026235	Epha4	GO:0005005
ENSMUSG00000018965	Ywhah	GO:0048814
ENSMUSG00000026959	Grin1	GO:0048814
ENSMUSG00000019769	Syne1	GO:0048814
ENSMUSG00000026259	Ngef	GO:0048814
ENSMUSG00000026235	Epha4	GO:0048814
ENSMUSG00000031565	Fgfr1	GO:0005007
ENSMUSG00000019997	Ctgf	GO:0051496
ENSMUSG00000022309	Angpt1	GO:0006022
ENSMUSG00000061731	Ext1	GO:0006022
ENSMUSG00000022309	Angpt1	GO:0006023
ENSMUSG00000061731	Ext1	GO:0006023
ENSMUSG00000002010	Idh3g	GO:0006753
ENSMUSG00000026202	Tuba4a	GO:0006753
ENSMUSG00000024782	Ak3	GO:0006753
ENSMUSG00000032238	Rora	GO:0006753
ENSMUSG00000005580	Adcy9	GO:0006753
ENSMUSG00000059173	Pde1a	GO:0006753
ENSMUSG00000024566	Atp9b	GO:0006753
ENSMUSG00000021772	Nkiras1	GO:0006753
ENSMUSG00000032470	Mras	GO:0006753
ENSMUSG00000022376	Adcy8	GO:0006753
ENSMUSG00000034472	Rasd2	GO:0006753
ENSMUSG00000032615	Nt5m	GO:0006753
ENSMUSG00000021270	Hsp90aa1	GO:0006753
ENSMUSG00000022066	Entpd4	GO:0006753
ENSMUSG00000032549	Rab6b	GO:0006753
ENSMUSG00000025324	Atp10a	GO:0006753
ENSMUSG00000020638	Cmpk2	GO:0006753
ENSMUSG00000041798	Gck	GO:0006753
ENSMUSG00000034566	Atp5h	GO:0006753
ENSMUSG00000041624	Gucy1a2	GO:0006753
ENSMUSG00000021700	Rab3c	GO:0006753
ENSMUSG00000020431	Adcy1	GO:0006753
ENSMUSG00000049907	Rasl11b	GO:0006753
ENSMUSG00000025422	Agap2	GO:0006753
ENSMUSG00000026463	Atp2b4	GO:0006753
ENSMUSG00000017412	Cacnb4	GO:0006753
ENSMUSG00000029467	Atp2a2	GO:0006753
ENSMUSG00000023019	Gpd1	GO:0006753
ENSMUSG00000024782	Ak3	GO:0006754
ENSMUSG00000024566	Atp9b	GO:0006754
ENSMUSG00000025324	Atp10a	GO:0006754
ENSMUSG00000034566	Atp5h	GO:0006754
ENSMUSG00000026463	Atp2b4	GO:0006754
ENSMUSG00000029467	Atp2a2	GO:0006754
ENSMUSG00000022309	Angpt1	GO:0006024
ENSMUSG00000061731	Ext1	GO:0006024
ENSMUSG00000019433	Gipc1	GO:0008021
ENSMUSG00000037217	Syn1	GO:0008021
ENSMUSG00000058420	Syt17	GO:0008021
ENSMUSG00000030500	Slc17a6	GO:0008021
ENSMUSG00000021314	Amph	GO:0008021
ENSMUSG00000021700	Rab3c	GO:0008021
ENSMUSG00000026959	Grin1	GO:0008021
ENSMUSG00000021687	Scamp1	GO:0008021
ENSMUSG00000048482	Bdnf	GO:0008021
ENSMUSG00000070570	Slc17a7	GO:0008021
ENSMUSG00000030731	Syt3	GO:0008021
ENSMUSG00000048799	Cep120	GO:0008022
ENSMUSG00000030701	Plekhb1	GO:0008022
ENSMUSG00000046093	Hpcal4	GO:0008022
ENSMUSG00000025909	Sntg1	GO:0008022
ENSMUSG00000041417	Pik3r1	GO:0008022
ENSMUSG00000027222	Pex16	GO:0008022
ENSMUSG00000021314	Amph	GO:0008022
ENSMUSG00000053477	Tcf4	GO:0008022
ENSMUSG00000035199	Arl6ip5	GO:0008022
ENSMUSG00000022055	Nefl	GO:0008022
ENSMUSG00000029467	Atp2a2	GO:0008022
ENSMUSG00000062077	Trim54	GO:0051494
ENSMUSG00000025432	Avil	GO:0051494
ENSMUSG00000027500	Stmn2	GO:0051494
ENSMUSG00000032366	Tpm1	GO:0051494
ENSMUSG00000027254	Mtap1a	GO:0051494
ENSMUSG00000027674	Pex5l	GO:0043855
ENSMUSG00000028224	Nbn	GO:0008026
ENSMUSG00000021478	Drd1a	GO:0048148
ENSMUSG00000006818	Sod2	GO:0048147
ENSMUSG00000026185	Igfbp5	GO:0048630
ENSMUSG00000006818	Sod2	GO:0048145
ENSMUSG00000033307	Mif	GO:0048145
ENSMUSG00000028224	Nbn	GO:0048145
ENSMUSG00000007817	Zmiz1	GO:0048145
ENSMUSG00000033849	B3galt2	GO:0008499
ENSMUSG00000034780	B3galt1	GO:0008499
ENSMUSG00000030189	Csda	GO:0048635
ENSMUSG00000027985	Lef1	GO:0048635
ENSMUSG00000048482	Bdnf	GO:0048635
ENSMUSG00000030189	Csda	GO:0048634
ENSMUSG00000005583	Mef2c	GO:0048634
ENSMUSG00000041936	Agrn	GO:0048634
ENSMUSG00000041417	Pik3r1	GO:0048634
ENSMUSG00000027985	Lef1	GO:0048634
ENSMUSG00000031565	Fgfr1	GO:0048634
ENSMUSG00000048482	Bdnf	GO:0048634
ENSMUSG00000030067	Foxp1	GO:0048634
ENSMUSG00000078566	Bnip3	GO:0051129
ENSMUSG00000062077	Trim54	GO:0051129
ENSMUSG00000025432	Avil	GO:0051129
ENSMUSG00000040363	Bcor	GO:0051129
ENSMUSG00000018965	Ywhah	GO:0051129
ENSMUSG00000027500	Stmn2	GO:0051129
ENSMUSG00000016664	Pacsin2	GO:0051129
ENSMUSG00000038255	Neurod2	GO:0051129
ENSMUSG00000020458	Rtn4	GO:0051129
ENSMUSG00000032366	Tpm1	GO:0051129
ENSMUSG00000021745	Ptprg	GO:0051129
ENSMUSG00000025810	Nrp1	GO:0051129
ENSMUSG00000069171	Nr2f1	GO:0051129
ENSMUSG00000059974	Ntm	GO:0051129
ENSMUSG00000048279	Sacs	GO:0051129
ENSMUSG00000027996	Sfrp2	GO:0051129
ENSMUSG00000027254	Mtap1a	GO:0051129
ENSMUSG00000025020	Slit1	GO:0051129
ENSMUSG00000026259	Ngef	GO:0051129
ENSMUSG00000026235	Epha4	GO:0051129
ENSMUSG00000045658	Pid1	GO:0051129
ENSMUSG00000032336	Nptn	GO:0051128
ENSMUSG00000019986	Ahi1	GO:0051128
ENSMUSG00000078566	Bnip3	GO:0051128
ENSMUSG00000021814	Anxa7	GO:0051128
ENSMUSG00000063887	Nlgn1	GO:0051128
ENSMUSG00000022309	Angpt1	GO:0051128
ENSMUSG00000026837	Col5a1	GO:0051128
ENSMUSG00000059040	Gm5506	GO:0051128
ENSMUSG00000037362	Nov	GO:0051128
ENSMUSG00000033377	Palmd	GO:0051128
ENSMUSG00000026185	Igfbp5	GO:0051128
ENSMUSG00000000440	Pparg	GO:0051128
ENSMUSG00000062077	Trim54	GO:0051128
ENSMUSG00000022054	Nefm	GO:0051128
ENSMUSG00000025432	Avil	GO:0051128
ENSMUSG00000040363	Bcor	GO:0051128
ENSMUSG00000018965	Ywhah	GO:0051128
ENSMUSG00000039145	Camk1d	GO:0051128
ENSMUSG00000027273	Snap25	GO:0051128
ENSMUSG00000005583	Mef2c	GO:0051128
ENSMUSG00000055447	Cd47	GO:0051128
ENSMUSG00000041936	Agrn	GO:0051128
ENSMUSG00000055653	Gpc3	GO:0051128
ENSMUSG00000048915	Efna5	GO:0051128
ENSMUSG00000033307	Mif	GO:0051128
ENSMUSG00000054693	Adam10	GO:0051128
ENSMUSG00000047139	Cd24a	GO:0051128
ENSMUSG00000027500	Stmn2	GO:0051128
ENSMUSG00000020704	Accn1	GO:0051128
ENSMUSG00000027297	Ltk	GO:0051128
ENSMUSG00000023972	Ptk7	GO:0051128
ENSMUSG00000038976	Ppp1r9b	GO:0051128
ENSMUSG00000016664	Pacsin2	GO:0051128
ENSMUSG00000027985	Lef1	GO:0051128
ENSMUSG00000050965	Prkca	GO:0051128
ENSMUSG00000003814	Calr	GO:0051128
ENSMUSG00000021270	Hsp90aa1	GO:0051128
ENSMUSG00000063524	Eno1	GO:0051128
ENSMUSG00000028488	Sh3gl2	GO:0051128
ENSMUSG00000049176	Frmpd4	GO:0051128
ENSMUSG00000032532	Cck	GO:0051128
ENSMUSG00000044783	Hjurp	GO:0051128
ENSMUSG00000021314	Amph	GO:0051128
ENSMUSG00000038255	Neurod2	GO:0051128
ENSMUSG00000020458	Rtn4	GO:0051128
ENSMUSG00000003378	Grik5	GO:0051128
ENSMUSG00000029207	Apbb2	GO:0051128
ENSMUSG00000018909	Arrb1	GO:0051128
ENSMUSG00000052504	Epha3	GO:0051128
ENSMUSG00000018501	Ncor1	GO:0051128
ENSMUSG00000031565	Fgfr1	GO:0051128
ENSMUSG00000052372	Il1rapl1	GO:0051128
ENSMUSG00000032366	Tpm1	GO:0051128
ENSMUSG00000056486	Chn1	GO:0051128
ENSMUSG00000021745	Ptprg	GO:0051128
ENSMUSG00000025810	Nrp1	GO:0051128
ENSMUSG00000005087	Cd44	GO:0051128
ENSMUSG00000069171	Nr2f1	GO:0051128
ENSMUSG00000059974	Ntm	GO:0051128
ENSMUSG00000025372	Baiap2	GO:0051128
ENSMUSG00000048279	Sacs	GO:0051128
ENSMUSG00000027996	Sfrp2	GO:0051128
ENSMUSG00000022105	Rb1	GO:0051128
ENSMUSG00000024074	Crim1	GO:0051128
ENSMUSG00000019997	Ctgf	GO:0051128
ENSMUSG00000017631	Abr	GO:0051128
ENSMUSG00000019843	Fyn	GO:0051128
ENSMUSG00000026959	Grin1	GO:0051128
ENSMUSG00000060534	Dcc	GO:0051128
ENSMUSG00000021978	Extl3	GO:0051128
ENSMUSG00000019769	Syne1	GO:0051128
ENSMUSG00000027254	Mtap1a	GO:0051128
ENSMUSG00000025020	Slit1	GO:0051128
ENSMUSG00000026259	Ngef	GO:0051128
ENSMUSG00000022055	Nefl	GO:0051128
ENSMUSG00000026235	Epha4	GO:0051128
ENSMUSG00000056427	Slit3	GO:0051128
ENSMUSG00000031841	Cdh13	GO:0051128
ENSMUSG00000045658	Pid1	GO:0051128
ENSMUSG00000059409	Ppp2r5d	GO:0051128
ENSMUSG00000038255	Neurod2	GO:0090128
ENSMUSG00000038255	Neurod2	GO:0090129
ENSMUSG00000022285	Ywhaz	GO:0031252
ENSMUSG00000027330	Cdc25b	GO:0048610
ENSMUSG00000018909	Arrb1	GO:0048610
ENSMUSG00000001552	Jup	GO:0048610
ENSMUSG00000019966	Kitl	GO:0048610
ENSMUSG00000007817	Zmiz1	GO:0048610
ENSMUSG00000013089	Etv5	GO:0048610
ENSMUSG00000002190	Clgn	GO:0048610
ENSMUSG00000056427	Slit3	GO:0048610
ENSMUSG00000057236	Rbbp4	GO:0031497
ENSMUSG00000044783	Hjurp	GO:0031497
ENSMUSG00000020458	Rtn4	GO:0043209
ENSMUSG00000012819	Cdh23	GO:0060113
ENSMUSG00000000440	Pparg	GO:0014074
ENSMUSG00000021478	Drd1a	GO:0014075
ENSMUSG00000041417	Pik3r1	GO:0014075
ENSMUSG00000053004	Hrh1	GO:0014075
ENSMUSG00000019997	Ctgf	GO:0014075
ENSMUSG00000026959	Grin1	GO:0014075
ENSMUSG00000060534	Dcc	GO:0014075
ENSMUSG00000021125	Arg2	GO:0014075
ENSMUSG00000028161	Ppp3ca	GO:0014075
ENSMUSG00000003099	Ppp5c	GO:0014072
ENSMUSG00000078816	Prkcc	GO:0014072
ENSMUSG00000026959	Grin1	GO:0014072
ENSMUSG00000021478	Drd1a	GO:0014073
ENSMUSG00000021814	Anxa7	GO:0014070
ENSMUSG00000026185	Igfbp5	GO:0014070
ENSMUSG00000000440	Pparg	GO:0014070
ENSMUSG00000023944	Hsp90ab1	GO:0014070
ENSMUSG00000003099	Ppp5c	GO:0014070
ENSMUSG00000021478	Drd1a	GO:0014070
ENSMUSG00000078816	Prkcc	GO:0014070
ENSMUSG00000028565	Nfia	GO:0014070
ENSMUSG00000027985	Lef1	GO:0014070
ENSMUSG00000050965	Prkca	GO:0014070
ENSMUSG00000019997	Ctgf	GO:0014070
ENSMUSG00000026959	Grin1	GO:0014070
ENSMUSG00000027270	6330527O06Rik	GO:0010008
ENSMUSG00000079557	2002-03-01	GO:0010008
ENSMUSG00000068747	Sort1	GO:0010008
ENSMUSG00000034981	Parm1	GO:0010008
ENSMUSG00000017639	Rab11fip4	GO:0010008
ENSMUSG00000021687	Scamp1	GO:0010008
ENSMUSG00000026235	Epha4	GO:0010008
ENSMUSG00000003948	Mmd	GO:0010008
ENSMUSG00000051343	Rab11fip5	GO:0010008
ENSMUSG00000021478	Drd1a	GO:0009395
ENSMUSG00000005899	Smpd4	GO:0009395
ENSMUSG00000024782	Ak3	GO:0009394
ENSMUSG00000032615	Nt5m	GO:0009394
ENSMUSG00000020638	Cmpk2	GO:0009394
ENSMUSG00000038256	Bcl9	GO:0019827
ENSMUSG00000031565	Fgfr1	GO:0019827
ENSMUSG00000037465	Klf10	GO:0019827
ENSMUSG00000060126	Tpt1	GO:0019827
ENSMUSG00000036545	Adamts2	GO:0044243
ENSMUSG00000028226	Mmp16	GO:0044243
ENSMUSG00000002010	Idh3g	GO:0000287
ENSMUSG00000059040	Gm5506	GO:0000287
ENSMUSG00000049225	Pdp1	GO:0000287
ENSMUSG00000024566	Atp9b	GO:0000287
ENSMUSG00000063524	Eno1	GO:0000287
ENSMUSG00000062604	Srpk2	GO:0000287
ENSMUSG00000025324	Atp10a	GO:0000287
ENSMUSG00000041798	Gck	GO:0000287
ENSMUSG00000030866	Ern2	GO:0000287
ENSMUSG00000017376	Nlk	GO:0000287
ENSMUSG00000029359	Tesc	GO:0000287
ENSMUSG00000027330	Cdc25b	GO:0000280
ENSMUSG00000025410	Dctn2	GO:0000280
ENSMUSG00000029385	Ccng2	GO:0000280
ENSMUSG00000030428	Ttyh1	GO:0000280
ENSMUSG00000062604	Srpk2	GO:0045071
ENSMUSG00000032336	Nptn	GO:0060284
ENSMUSG00000042834	D0H4S114	GO:0060284
ENSMUSG00000063887	Nlgn1	GO:0060284
ENSMUSG00000000440	Pparg	GO:0060284
ENSMUSG00000022054	Nefm	GO:0060284
ENSMUSG00000025432	Avil	GO:0060284
ENSMUSG00000018965	Ywhah	GO:0060284
ENSMUSG00000039145	Camk1d	GO:0060284
ENSMUSG00000005583	Mef2c	GO:0060284
ENSMUSG00000041936	Agrn	GO:0060284
ENSMUSG00000051367	Six1	GO:0060284
ENSMUSG00000041417	Pik3r1	GO:0060284
ENSMUSG00000033307	Mif	GO:0060284
ENSMUSG00000047139	Cd24a	GO:0060284
ENSMUSG00000049107	Ntf3	GO:0060284
ENSMUSG00000027500	Stmn2	GO:0060284
ENSMUSG00000027297	Ltk	GO:0060284
ENSMUSG00000023972	Ptk7	GO:0060284
ENSMUSG00000027985	Lef1	GO:0060284
ENSMUSG00000003814	Calr	GO:0060284
ENSMUSG00000038255	Neurod2	GO:0060284
ENSMUSG00000020458	Rtn4	GO:0060284
ENSMUSG00000064293	Cntn4	GO:0060284
ENSMUSG00000052504	Epha3	GO:0060284
ENSMUSG00000031565	Fgfr1	GO:0060284
ENSMUSG00000052372	Il1rapl1	GO:0060284
ENSMUSG00000056486	Chn1	GO:0060284
ENSMUSG00000020647	Ncoa1	GO:0060284
ENSMUSG00000053477	Tcf4	GO:0060284
ENSMUSG00000021745	Ptprg	GO:0060284
ENSMUSG00000021743	Fezf2	GO:0060284
ENSMUSG00000025810	Nrp1	GO:0060284
ENSMUSG00000069171	Nr2f1	GO:0060284
ENSMUSG00000059974	Ntm	GO:0060284
ENSMUSG00000027996	Sfrp2	GO:0060284
ENSMUSG00000028224	Nbn	GO:0060284
ENSMUSG00000051391	Ywhag	GO:0060284
ENSMUSG00000026959	Grin1	GO:0060284
ENSMUSG00000060534	Dcc	GO:0060284
ENSMUSG00000048482	Bdnf	GO:0060284
ENSMUSG00000019769	Syne1	GO:0060284
ENSMUSG00000025020	Slit1	GO:0060284
ENSMUSG00000026259	Ngef	GO:0060284
ENSMUSG00000022055	Nefl	GO:0060284
ENSMUSG00000028946	Hes3	GO:0060284
ENSMUSG00000026235	Epha4	GO:0060284
ENSMUSG00000013089	Etv5	GO:0060284
ENSMUSG00000059409	Ppp2r5d	GO:0060284
ENSMUSG00000029223	Uchl1	GO:0030705
ENSMUSG00000022054	Nefm	GO:0030705
ENSMUSG00000017167	Cntnap1	GO:0030705
ENSMUSG00000022055	Nefl	GO:0030705
ENSMUSG00000027985	Lef1	GO:0030851
ENSMUSG00000027109	Sp3	GO:0030851
ENSMUSG00000032528	Vipr1	GO:0004999
ENSMUSG00000044933	Sstr3	GO:0004994
ENSMUSG00000002010	Idh3g	GO:0004448
ENSMUSG00000002010	Idh3g	GO:0004449
ENSMUSG00000025946	Pth2r	GO:0004991
ENSMUSG00000030104	Edem1	GO:0004571
ENSMUSG00000003746	Man1a	GO:0004571
ENSMUSG00000053819	Camk2d	GO:0008284
ENSMUSG00000005583	Mef2c	GO:0008284
ENSMUSG00000055447	Cd47	GO:0008284
ENSMUSG00000051367	Six1	GO:0008284
ENSMUSG00000030283	St8sia1	GO:0008284
ENSMUSG00000033307	Mif	GO:0008284
ENSMUSG00000054693	Adam10	GO:0008284
ENSMUSG00000047139	Cd24a	GO:0008284
ENSMUSG00000001642	Akr1b3	GO:0008284
ENSMUSG00000027985	Lef1	GO:0008284
ENSMUSG00000050965	Prkca	GO:0008284
ENSMUSG00000003814	Calr	GO:0008284
ENSMUSG00000032532	Cck	GO:0008284
ENSMUSG00000062604	Srpk2	GO:0008284
ENSMUSG00000031565	Fgfr1	GO:0008284
ENSMUSG00000032185	Carm1	GO:0008284
ENSMUSG00000038418	Egr1	GO:0008284
ENSMUSG00000033730	Egr3	GO:0008284
ENSMUSG00000027996	Sfrp2	GO:0008284
ENSMUSG00000028224	Nbn	GO:0008284
ENSMUSG00000019997	Ctgf	GO:0008284
ENSMUSG00000019966	Kitl	GO:0008284
ENSMUSG00000054263	Lifr	GO:0008284
ENSMUSG00000030067	Foxp1	GO:0008284
ENSMUSG00000007817	Zmiz1	GO:0008284
ENSMUSG00000013089	Etv5	GO:0008284
ENSMUSG00000025422	Agap2	GO:0008284
ENSMUSG00000031841	Cdh13	GO:0008284
ENSMUSG00000045658	Pid1	GO:0008284
ENSMUSG00000006818	Sod2	GO:0008285
ENSMUSG00000042429	Adora1	GO:0008285
ENSMUSG00000026185	Igfbp5	GO:0008285
ENSMUSG00000000440	Pparg	GO:0008285
ENSMUSG00000048251	Bcl11b	GO:0008285
ENSMUSG00000005583	Mef2c	GO:0008285
ENSMUSG00000041556	Fbxo2	GO:0008285
ENSMUSG00000041417	Pik3r1	GO:0008285
ENSMUSG00000055653	Gpc3	GO:0008285
ENSMUSG00000019889	Ptprk	GO:0008285
ENSMUSG00000047139	Cd24a	GO:0008285
ENSMUSG00000079037	Prnp	GO:0008285
ENSMUSG00000050965	Prkca	GO:0008285
ENSMUSG00000021743	Fezf2	GO:0008285
ENSMUSG00000028909	Ptpru	GO:0008285
ENSMUSG00000027996	Sfrp2	GO:0008285
ENSMUSG00000022105	Rb1	GO:0008285
ENSMUSG00000029359	Tesc	GO:0008285
ENSMUSG00000048482	Bdnf	GO:0008285
ENSMUSG00000008575	Nfib	GO:0008285
ENSMUSG00000034850	Tmem127	GO:0008285
ENSMUSG00000056427	Slit3	GO:0008285
ENSMUSG00000031841	Cdh13	GO:0008285
ENSMUSG00000036766	Dner	GO:0055002
ENSMUSG00000031972	Acta1	GO:0055002
ENSMUSG00000027985	Lef1	GO:0055002
ENSMUSG00000017412	Cacnb4	GO:0055002
ENSMUSG00000028161	Ppp3ca	GO:0055002
ENSMUSG00000049225	Pdp1	GO:0008287
ENSMUSG00000027784	Ppm1l	GO:0008287
ENSMUSG00000059409	Ppp2r5d	GO:0008287
ENSMUSG00000028161	Ppp3ca	GO:0008287
ENSMUSG00000023927	Satb1	GO:0008283
ENSMUSG00000021814	Anxa7	GO:0008283
ENSMUSG00000029223	Uchl1	GO:0008283
ENSMUSG00000048799	Cep120	GO:0008283
ENSMUSG00000007989	Fzd3	GO:0008283
ENSMUSG00000026185	Igfbp5	GO:0008283
ENSMUSG00000044813	Shb	GO:0008283
ENSMUSG00000026872	Zeb2	GO:0008283
ENSMUSG00000027356	Fermt1	GO:0008283
ENSMUSG00000005583	Mef2c	GO:0008283
ENSMUSG00000055653	Gpc3	GO:0008283
ENSMUSG00000033307	Mif	GO:0008283
ENSMUSG00000028864	Hgf	GO:0008283
ENSMUSG00000027297	Ltk	GO:0008283
ENSMUSG00000027985	Lef1	GO:0008283
ENSMUSG00000032356	Rasgrf1	GO:0008283
ENSMUSG00000025410	Dctn2	GO:0008283
ENSMUSG00000038418	Egr1	GO:0008283
ENSMUSG00000027996	Sfrp2	GO:0008283
ENSMUSG00000028224	Nbn	GO:0008283
ENSMUSG00000019843	Fyn	GO:0008283
ENSMUSG00000040820	Hlcs	GO:0008283
ENSMUSG00000031841	Cdh13	GO:0008283
ENSMUSG00000022309	Angpt1	GO:0055008
ENSMUSG00000022306	Zfpm2	GO:0055008
ENSMUSG00000032366	Tpm1	GO:0055008
ENSMUSG00000024782	Ak3	GO:0009188
ENSMUSG00000018417	Myo1b	GO:0051017
ENSMUSG00000018909	Arrb1	GO:0051017
ENSMUSG00000015143	Actn1	GO:0051017
ENSMUSG00000027533	Fabp5	GO:0008289
ENSMUSG00000028488	Sh3gl2	GO:0008289
ENSMUSG00000049176	Frmpd4	GO:0008289
ENSMUSG00000024955	Esrra	GO:0008289
ENSMUSG00000034171	Faah	GO:0008289
ENSMUSG00000020836	Coro6	GO:0051015
ENSMUSG00000031328	Flna	GO:0051015
ENSMUSG00000015143	Actn1	GO:0051015
ENSMUSG00000032366	Tpm1	GO:0051015
ENSMUSG00000006154	Eps8l1	GO:0051015
ENSMUSG00000020638	Cmpk2	GO:0009189
ENSMUSG00000021668	Polk	GO:0006974
ENSMUSG00000034023	Fancd2	GO:0006974
ENSMUSG00000033307	Mif	GO:0006974
ENSMUSG00000028224	Nbn	GO:0006974
ENSMUSG00000020032	Nuak1	GO:0006974
ENSMUSG00000022066	Entpd4	GO:0009138
ENSMUSG00000020638	Cmpk2	GO:0009138
ENSMUSG00000042429	Adora1	GO:0046883
ENSMUSG00000066456	Hmgn3	GO:0046883
ENSMUSG00000027273	Snap25	GO:0046883
ENSMUSG00000048915	Efna5	GO:0046883
ENSMUSG00000020277	Pfkl	GO:0046883
ENSMUSG00000018909	Arrb1	GO:0046883
ENSMUSG00000041798	Gck	GO:0046883
ENSMUSG00000027674	Pex5l	GO:0046883
ENSMUSG00000028161	Ppp3ca	GO:0046883
ENSMUSG00000002010	Idh3g	GO:0048037
ENSMUSG00000057069	Ero1lb	GO:0048037
ENSMUSG00000029009	Mthfr	GO:0048037
ENSMUSG00000022947	Cbr3	GO:0048037
ENSMUSG00000030905	Crym	GO:0048037
ENSMUSG00000031672	Got2	GO:0048037
ENSMUSG00000023019	Gpd1	GO:0048037
ENSMUSG00000027985	Lef1	GO:0043921
ENSMUSG00000046699	Slitrk4	GO:0007409
ENSMUSG00000050896	Rtn4rl2	GO:0007409
ENSMUSG00000042834	D0H4S114	GO:0007409
ENSMUSG00000029223	Uchl1	GO:0007409
ENSMUSG00000025582	Nptx1	GO:0007409
ENSMUSG00000048251	Bcl11b	GO:0007409
ENSMUSG00000027273	Snap25	GO:0007409
ENSMUSG00000050965	Prkca	GO:0007409
ENSMUSG00000032532	Cck	GO:0007409
ENSMUSG00000045287	Rtn4rl1	GO:0007409
ENSMUSG00000059857	Ntng1	GO:0007409
ENSMUSG00000060534	Dcc	GO:0007409
ENSMUSG00000020431	Adcy1	GO:0007409
ENSMUSG00000008575	Nfib	GO:0007409
ENSMUSG00000025020	Slit1	GO:0007409
ENSMUSG00000022055	Nefl	GO:0007409
ENSMUSG00000035513	Ntng2	GO:0007409
ENSMUSG00000026235	Epha4	GO:0007409
ENSMUSG00000039114	Nrn1	GO:0007409
ENSMUSG00000043811	Rtn4r	GO:0007409
ENSMUSG00000021217	Tshz3	GO:0001657
ENSMUSG00000051367	Six1	GO:0001657
ENSMUSG00000031565	Fgfr1	GO:0001657
ENSMUSG00000021125	Arg2	GO:0001657
ENSMUSG00000048482	Bdnf	GO:0001657
ENSMUSG00000042429	Adora1	GO:0046888
ENSMUSG00000020277	Pfkl	GO:0046888
ENSMUSG00000028161	Ppp3ca	GO:0046888
ENSMUSG00000042429	Adora1	GO:0001659
ENSMUSG00000021478	Drd1a	GO:0001659
ENSMUSG00000052504	Epha3	GO:0001659
ENSMUSG00000024782	Ak3	GO:0009133
ENSMUSG00000020638	Cmpk2	GO:0009133
ENSMUSG00000024782	Ak3	GO:0009132
ENSMUSG00000022066	Entpd4	GO:0009132
ENSMUSG00000020638	Cmpk2	GO:0009132
ENSMUSG00000024782	Ak3	GO:0009135
ENSMUSG00000006818	Sod2	GO:0006979
ENSMUSG00000078566	Bnip3	GO:0006979
ENSMUSG00000058927	Gm10053	GO:0006979
ENSMUSG00000026204	Ptprn	GO:0006979
ENSMUSG00000063694	Cycs	GO:0006979
ENSMUSG00000019889	Ptprk	GO:0006979
ENSMUSG00000079037	Prnp	GO:0006979
ENSMUSG00000021820	Camk2g	GO:0006979
ENSMUSG00000050965	Prkca	GO:0006979
ENSMUSG00000013089	Etv5	GO:0006979
ENSMUSG00000024782	Ak3	GO:0009136
ENSMUSG00000022560	Gpr172b	GO:0032217
ENSMUSG00000023972	Ptk7	GO:0030859
ENSMUSG00000068747	Sort1	GO:0006895
ENSMUSG00000019997	Ctgf	GO:0070318
ENSMUSG00000031565	Fgfr1	GO:2000380
ENSMUSG00000027996	Sfrp2	GO:2000380
ENSMUSG00000041417	Pik3r1	GO:0010039
ENSMUSG00000022377	Asap1	GO:0032318
ENSMUSG00000029174	Tbc1d1	GO:0032318
ENSMUSG00000026155	Smap1	GO:0032318
ENSMUSG00000062232	Rapgef2	GO:0032318
ENSMUSG00000041936	Agrn	GO:0032318
ENSMUSG00000048915	Efna5	GO:0032318
ENSMUSG00000036473	Tbc1d24	GO:0032318
ENSMUSG00000032356	Rasgrf1	GO:0032318
ENSMUSG00000052504	Epha3	GO:0032318
ENSMUSG00000056486	Chn1	GO:0032318
ENSMUSG00000031453	Rasa3	GO:0032318
ENSMUSG00000017631	Abr	GO:0032318
ENSMUSG00000026235	Epha4	GO:0032318
ENSMUSG00000025422	Agap2	GO:0032318
ENSMUSG00000035954	Dock4	GO:0032318
ENSMUSG00000029223	Uchl1	GO:0004197
ENSMUSG00000016256	Ctsz	GO:0004197
ENSMUSG00000034825	Nrip3	GO:0004190
ENSMUSG00000034472	Rasd2	GO:0033235
ENSMUSG00000001552	Jup	GO:0090381
ENSMUSG00000020647	Ncoa1	GO:0016747
ENSMUSG00000027425	Csrp2bp	GO:0016747
ENSMUSG00000031823	Zdhhc7	GO:0016747
ENSMUSG00000031841	Cdh13	GO:0030032
ENSMUSG00000038967	Pdk2	GO:0018106
[truncated: 45,504 more rows]

## Sheet: KEGGassoc
Ensembl	symbol	KEGG
ENSMUSG00000041417	Pik3r1	VEGF signaling pathway:KEGG-mmu04370
ENSMUSG00000078816	Prkcc	VEGF signaling pathway:KEGG-mmu04370
ENSMUSG00000050965	Prkca	VEGF signaling pathway:KEGG-mmu04370
ENSMUSG00000033953	Ppp3r1	VEGF signaling pathway:KEGG-mmu04370
ENSMUSG00000039936	Pik3cd	VEGF signaling pathway:KEGG-mmu04370
ENSMUSG00000028161	Ppp3ca	VEGF signaling pathway:KEGG-mmu04370
ENSMUSG00000041417	Pik3r1	Acute myeloid leukemia:KEGG-mmu05221
ENSMUSG00000027985	Lef1	Acute myeloid leukemia:KEGG-mmu05221
ENSMUSG00000001552	Jup	Acute myeloid leukemia:KEGG-mmu05221
ENSMUSG00000039936	Pik3cd	Acute myeloid leukemia:KEGG-mmu05221
ENSMUSG00000006818	Sod2	Huntington's disease:KEGG-mmu05016
ENSMUSG00000058927	Gm10053	Huntington's disease:KEGG-mmu05016
ENSMUSG00000063882	Uqcrh	Huntington's disease:KEGG-mmu05016
ENSMUSG00000020402	Vdac1	Huntington's disease:KEGG-mmu05016
ENSMUSG00000000440	Pparg	Huntington's disease:KEGG-mmu05016
ENSMUSG00000016319	Slc25a5	Huntington's disease:KEGG-mmu05016
ENSMUSG00000063694	Cycs	Huntington's disease:KEGG-mmu05016
ENSMUSG00000035885	Cox8a	Huntington's disease:KEGG-mmu05016
ENSMUSG00000025410	Dctn2	Huntington's disease:KEGG-mmu05016
ENSMUSG00000031633	Slc25a4	Huntington's disease:KEGG-mmu05016
ENSMUSG00000034566	Atp5h	Huntington's disease:KEGG-mmu05016
ENSMUSG00000027673	Ndufb5	Huntington's disease:KEGG-mmu05016
ENSMUSG00000026959	Grin1	Huntington's disease:KEGG-mmu05016
ENSMUSG00000048482	Bdnf	Huntington's disease:KEGG-mmu05016
ENSMUSG00000005580	Adcy9	Bile secretion:KEGG-mmu04976
ENSMUSG00000022376	Adcy8	Bile secretion:KEGG-mmu04976
ENSMUSG00000020431	Adcy1	Bile secretion:KEGG-mmu04976
ENSMUSG00000041798	Gck	Butirosin and neomycin biosynthesis:KEGG-mmu00524
ENSMUSG00000041556	Fbxo2	Ubiquitin mediated proteolysis:KEGG-mmu04120
ENSMUSG00000032307	Ube2q2	Ubiquitin mediated proteolysis:KEGG-mmu04120
ENSMUSG00000026837	Col5a1	Focal adhesion:KEGG-mmu04510
ENSMUSG00000042453	Reln	Focal adhesion:KEGG-mmu04510
ENSMUSG00000041417	Pik3r1	Focal adhesion:KEGG-mmu04510
ENSMUSG00000027009	Itga4	Focal adhesion:KEGG-mmu04510
ENSMUSG00000078816	Prkcc	Focal adhesion:KEGG-mmu04510
ENSMUSG00000028864	Hgf	Focal adhesion:KEGG-mmu04510
ENSMUSG00000050965	Prkca	Focal adhesion:KEGG-mmu04510
ENSMUSG00000032356	Rasgrf1	Focal adhesion:KEGG-mmu04510
ENSMUSG00000031328	Flna	Focal adhesion:KEGG-mmu04510
ENSMUSG00000000555	Itga5	Focal adhesion:KEGG-mmu04510
ENSMUSG00000015143	Actn1	Focal adhesion:KEGG-mmu04510
ENSMUSG00000024421	Lama3	Focal adhesion:KEGG-mmu04510
ENSMUSG00000019843	Fyn	Focal adhesion:KEGG-mmu04510
ENSMUSG00000039936	Pik3cd	Focal adhesion:KEGG-mmu04510
ENSMUSG00000026193	Fn1	Focal adhesion:KEGG-mmu04510
ENSMUSG00000002900	Lamb1	Focal adhesion:KEGG-mmu04510
ENSMUSG00000029860	Zyx	Focal adhesion:KEGG-mmu04510
ENSMUSG00000026103	Gls	Proximal tubule bicarbonate reclamation:KEGG-mmu04964
ENSMUSG00000063887	Nlgn1	Cell adhesion molecules (CAMs):KEGG-mmu04514
ENSMUSG00000005338	Cadm3	Cell adhesion molecules (CAMs):KEGG-mmu04514
ENSMUSG00000027009	Itga4	Cell adhesion molecules (CAMs):KEGG-mmu04514
ENSMUSG00000017167	Cntnap1	Cell adhesion molecules (CAMs):KEGG-mmu04514
ENSMUSG00000040037	Negr1	Cell adhesion molecules (CAMs):KEGG-mmu04514
ENSMUSG00000022512	Cldn1	Cell adhesion molecules (CAMs):KEGG-mmu04514
ENSMUSG00000066392	Nrxn3	Cell adhesion molecules (CAMs):KEGG-mmu04514
ENSMUSG00000016494	Cd34	Cell adhesion molecules (CAMs):KEGG-mmu04514
ENSMUSG00000013846	St3gal1	Mucin type O-Glycan biosynthesis:KEGG-mmu00512
ENSMUSG00000034040	Wbscr17	Mucin type O-Glycan biosynthesis:KEGG-mmu00512
ENSMUSG00000022105	Rb1	Bladder cancer:KEGG-mmu05219
ENSMUSG00000021559	Dapk1	Bladder cancer:KEGG-mmu05219
ENSMUSG00000027330	Cdc25b	MAPK signaling pathway:KEGG-mmu04010
ENSMUSG00000003099	Ppp5c	MAPK signaling pathway:KEGG-mmu04010
ENSMUSG00000005583	Mef2c	MAPK signaling pathway:KEGG-mmu04010
ENSMUSG00000062232	Rapgef2	MAPK signaling pathway:KEGG-mmu04010
ENSMUSG00000078816	Prkcc	MAPK signaling pathway:KEGG-mmu04010
ENSMUSG00000032470	Mras	MAPK signaling pathway:KEGG-mmu04010
ENSMUSG00000053395	Cacng8	MAPK signaling pathway:KEGG-mmu04010
ENSMUSG00000049107	Ntf3	MAPK signaling pathway:KEGG-mmu04010
ENSMUSG00000027223	Mapk8ip1	MAPK signaling pathway:KEGG-mmu04010
ENSMUSG00000031530	Dusp4	MAPK signaling pathway:KEGG-mmu04010
ENSMUSG00000050965	Prkca	MAPK signaling pathway:KEGG-mmu04010
ENSMUSG00000032356	Rasgrf1	MAPK signaling pathway:KEGG-mmu04010
ENSMUSG00000031328	Flna	MAPK signaling pathway:KEGG-mmu04010
ENSMUSG00000032946	Rasgrp2	MAPK signaling pathway:KEGG-mmu04010
ENSMUSG00000022416	Cacna1i	MAPK signaling pathway:KEGG-mmu04010
ENSMUSG00000018909	Arrb1	MAPK signaling pathway:KEGG-mmu04010
ENSMUSG00000031565	Fgfr1	MAPK signaling pathway:KEGG-mmu04010
ENSMUSG00000021991	Cacna2d3	MAPK signaling pathway:KEGG-mmu04010
ENSMUSG00000017376	Nlk	MAPK signaling pathway:KEGG-mmu04010
ENSMUSG00000030854	Ptpn5	MAPK signaling pathway:KEGG-mmu04010
ENSMUSG00000033953	Ppp3r1	MAPK signaling pathway:KEGG-mmu04010
ENSMUSG00000048482	Bdnf	MAPK signaling pathway:KEGG-mmu04010
ENSMUSG00000007033	Hspa1l	MAPK signaling pathway:KEGG-mmu04010
ENSMUSG00000017412	Cacnb4	MAPK signaling pathway:KEGG-mmu04010
ENSMUSG00000066189	Cacng3	MAPK signaling pathway:KEGG-mmu04010
ENSMUSG00000028161	Ppp3ca	MAPK signaling pathway:KEGG-mmu04010
ENSMUSG00000001175	Calm1	Olfactory transduction:KEGG-mmu04740
ENSMUSG00000024617	Camk2a	Olfactory transduction:KEGG-mmu04740
ENSMUSG00000052920	Prkg1	Olfactory transduction:KEGG-mmu04740
ENSMUSG00000053819	Camk2d	Olfactory transduction:KEGG-mmu04740
ENSMUSG00000036438	Calm2	Olfactory transduction:KEGG-mmu04740
ENSMUSG00000021820	Camk2g	Olfactory transduction:KEGG-mmu04740
ENSMUSG00000019370	Calm3	Olfactory transduction:KEGG-mmu04740
ENSMUSG00000042249	Adrbk2	Olfactory transduction:KEGG-mmu04740
ENSMUSG00000073888	Ccl27a	Chemokine signaling pathway:KEGG-mmu04062
ENSMUSG00000005580	Adcy9	Chemokine signaling pathway:KEGG-mmu04062
ENSMUSG00000041417	Pik3r1	Chemokine signaling pathway:KEGG-mmu04062
ENSMUSG00000022376	Adcy8	Chemokine signaling pathway:KEGG-mmu04062
ENSMUSG00000032946	Rasgrp2	Chemokine signaling pathway:KEGG-mmu04062
ENSMUSG00000018909	Arrb1	Chemokine signaling pathway:KEGG-mmu04062
ENSMUSG00000039936	Pik3cd	Chemokine signaling pathway:KEGG-mmu04062
ENSMUSG00000020431	Adcy1	Chemokine signaling pathway:KEGG-mmu04062
ENSMUSG00000048240	Gng7	Chemokine signaling pathway:KEGG-mmu04062
ENSMUSG00000026688	Mgst3	Drug metabolism - cytochrome P450:KEGG-mmu00982
ENSMUSG00000026103	Gls	Arginine and proline metabolism:KEGG-mmu00330
ENSMUSG00000031672	Got2	Arginine and proline metabolism:KEGG-mmu00330
ENSMUSG00000021125	Arg2	Arginine and proline metabolism:KEGG-mmu00330
ENSMUSG00000000275	Trim25	RIG-I-like receptor signaling pathway:KEGG-mmu04622
ENSMUSG00000063882	Uqcrh	Cardiac muscle contraction:KEGG-mmu04260
ENSMUSG00000053395	Cacng8	Cardiac muscle contraction:KEGG-mmu04260
ENSMUSG00000035885	Cox8a	Cardiac muscle contraction:KEGG-mmu04260
ENSMUSG00000032366	Tpm1	Cardiac muscle contraction:KEGG-mmu04260
ENSMUSG00000021991	Cacna2d3	Cardiac muscle contraction:KEGG-mmu04260
ENSMUSG00000017412	Cacnb4	Cardiac muscle contraction:KEGG-mmu04260
ENSMUSG00000066189	Cacng3	Cardiac muscle contraction:KEGG-mmu04260
ENSMUSG00000029467	Atp2a2	Cardiac muscle contraction:KEGG-mmu04260
ENSMUSG00000041417	Pik3r1	Endometrial cancer:KEGG-mmu05213
ENSMUSG00000027985	Lef1	Endometrial cancer:KEGG-mmu05213
ENSMUSG00000039936	Pik3cd	Endometrial cancer:KEGG-mmu05213
ENSMUSG00000005580	Adcy9	Vasopressin-regulated water reabsorption:KEGG-mmu04962
ENSMUSG00000025410	Dctn2	Vasopressin-regulated water reabsorption:KEGG-mmu04962
ENSMUSG00000001642	Akr1b3	Pentose and glucuronate interconversions:KEGG-mmu00040
ENSMUSG00000007989	Fzd3	Basal cell carcinoma:KEGG-mmu05217
ENSMUSG00000027985	Lef1	Basal cell carcinoma:KEGG-mmu05217
ENSMUSG00000026202	Tuba4a	Gap junction:KEGG-mmu04540
ENSMUSG00000052920	Prkg1	Gap junction:KEGG-mmu04540
ENSMUSG00000005580	Adcy9	Gap junction:KEGG-mmu04540
ENSMUSG00000021478	Drd1a	Gap junction:KEGG-mmu04540
ENSMUSG00000078816	Prkcc	Gap junction:KEGG-mmu04540
ENSMUSG00000022376	Adcy8	Gap junction:KEGG-mmu04540
ENSMUSG00000050965	Prkca	Gap junction:KEGG-mmu04540
ENSMUSG00000041624	Gucy1a2	Gap junction:KEGG-mmu04540
ENSMUSG00000020431	Adcy1	Gap junction:KEGG-mmu04540
ENSMUSG00000030283	St8sia1	Glycosphingolipid biosynthesis - globo series:KEGG-mmu00603
ENSMUSG00000013846	St3gal1	Glycosphingolipid biosynthesis - globo series:KEGG-mmu00603
ENSMUSG00000002010	Idh3g	Citrate cycle (TCA cycle):KEGG-mmu00020
ENSMUSG00000059409	Ppp2r5d	mRNA surveillance pathway:KEGG-mmu03015
ENSMUSG00000032238	Rora	Circadian rhythm - mammal:KEGG-mmu04710
ENSMUSG00000026077	Npas2	Circadian rhythm - mammal:KEGG-mmu04710
ENSMUSG00000000440	Pparg	Thyroid cancer:KEGG-mmu05216
ENSMUSG00000027985	Lef1	Thyroid cancer:KEGG-mmu05216
ENSMUSG00000001175	Calm1	GnRH signaling pathway:KEGG-mmu04912
ENSMUSG00000024617	Camk2a	GnRH signaling pathway:KEGG-mmu04912
ENSMUSG00000053819	Camk2d	GnRH signaling pathway:KEGG-mmu04912
ENSMUSG00000036438	Calm2	GnRH signaling pathway:KEGG-mmu04912
ENSMUSG00000005580	Adcy9	GnRH signaling pathway:KEGG-mmu04912
ENSMUSG00000022376	Adcy8	GnRH signaling pathway:KEGG-mmu04912
ENSMUSG00000021820	Camk2g	GnRH signaling pathway:KEGG-mmu04912
ENSMUSG00000050965	Prkca	GnRH signaling pathway:KEGG-mmu04912
ENSMUSG00000019370	Calm3	GnRH signaling pathway:KEGG-mmu04912
ENSMUSG00000020431	Adcy1	GnRH signaling pathway:KEGG-mmu04912
ENSMUSG00000025876	Unc5a	Axon guidance:KEGG-mmu04360
ENSMUSG00000055540	Epha6	Axon guidance:KEGG-mmu04360
ENSMUSG00000048915	Efna5	Axon guidance:KEGG-mmu04360
ENSMUSG00000052504	Epha3	Axon guidance:KEGG-mmu04360
ENSMUSG00000059857	Ntng1	Axon guidance:KEGG-mmu04360
ENSMUSG00000025810	Nrp1	Axon guidance:KEGG-mmu04360
ENSMUSG00000025085	Ablim1	Axon guidance:KEGG-mmu04360
ENSMUSG00000063531	Sema3e	Axon guidance:KEGG-mmu04360
ENSMUSG00000033953	Ppp3r1	Axon guidance:KEGG-mmu04360
ENSMUSG00000019843	Fyn	Axon guidance:KEGG-mmu04360
ENSMUSG00000060534	Dcc	Axon guidance:KEGG-mmu04360
ENSMUSG00000025020	Slit1	Axon guidance:KEGG-mmu04360
ENSMUSG00000026259	Ngef	Axon guidance:KEGG-mmu04360
ENSMUSG00000026235	Epha4	Axon guidance:KEGG-mmu04360
ENSMUSG00000029168	Dpysl5	Axon guidance:KEGG-mmu04360
ENSMUSG00000056427	Slit3	Axon guidance:KEGG-mmu04360
ENSMUSG00000028161	Ppp3ca	Axon guidance:KEGG-mmu04360
ENSMUSG00000022377	Asap1	Endocytosis:KEGG-mmu04144
ENSMUSG00000026155	Smap1	Endocytosis:KEGG-mmu04144
ENSMUSG00000037126	Psd	Endocytosis:KEGG-mmu04144
ENSMUSG00000028488	Sh3gl2	Endocytosis:KEGG-mmu04144
ENSMUSG00000018909	Arrb1	Endocytosis:KEGG-mmu04144
ENSMUSG00000030465	Psd3	Endocytosis:KEGG-mmu04144
ENSMUSG00000017639	Rab11fip4	Endocytosis:KEGG-mmu04144
ENSMUSG00000025422	Agap2	Endocytosis:KEGG-mmu04144
ENSMUSG00000051343	Rab11fip5	Endocytosis:KEGG-mmu04144
ENSMUSG00000007033	Hspa1l	Endocytosis:KEGG-mmu04144
ENSMUSG00000031672	Got2	Cysteine and methionine metabolism:KEGG-mmu00270
ENSMUSG00000032306	Mpi	Fructose and mannose metabolism:KEGG-mmu00051
ENSMUSG00000001642	Akr1b3	Fructose and mannose metabolism:KEGG-mmu00051
ENSMUSG00000020277	Pfkl	Fructose and mannose metabolism:KEGG-mmu00051
ENSMUSG00000058927	Gm10053	Amyotrophic lateral sclerosis (ALS):KEGG-mmu05014
ENSMUSG00000022054	Nefm	Amyotrophic lateral sclerosis (ALS):KEGG-mmu05014
ENSMUSG00000063694	Cycs	Amyotrophic lateral sclerosis (ALS):KEGG-mmu05014
ENSMUSG00000033953	Ppp3r1	Amyotrophic lateral sclerosis (ALS):KEGG-mmu05014
ENSMUSG00000026959	Grin1	Amyotrophic lateral sclerosis (ALS):KEGG-mmu05014
ENSMUSG00000022055	Nefl	Amyotrophic lateral sclerosis (ALS):KEGG-mmu05014
ENSMUSG00000020396	Nefh	Amyotrophic lateral sclerosis (ALS):KEGG-mmu05014
ENSMUSG00000028161	Ppp3ca	Amyotrophic lateral sclerosis (ALS):KEGG-mmu05014
ENSMUSG00000001642	Akr1b3	Galactose metabolism:KEGG-mmu00052
ENSMUSG00000020277	Pfkl	Galactose metabolism:KEGG-mmu00052
ENSMUSG00000041798	Gck	Galactose metabolism:KEGG-mmu00052
ENSMUSG00000041417	Pik3r1	Toll-like receptor signaling pathway:KEGG-mmu04620
ENSMUSG00000039936	Pik3cd	Toll-like receptor signaling pathway:KEGG-mmu04620
ENSMUSG00000022965	Ifngr2	Chagas disease (American trypanosomiasis):KEGG-mmu05142
ENSMUSG00000041417	Pik3r1	Chagas disease (American trypanosomiasis):KEGG-mmu05142
ENSMUSG00000003814	Calr	Chagas disease (American trypanosomiasis):KEGG-mmu05142
ENSMUSG00000039936	Pik3cd	Chagas disease (American trypanosomiasis):KEGG-mmu05142
ENSMUSG00000020431	Adcy1	Chagas disease (American trypanosomiasis):KEGG-mmu05142
ENSMUSG00000040820	Hlcs	Biotin metabolism:KEGG-mmu00780
ENSMUSG00000041417	Pik3r1	Type II diabetes mellitus:KEGG-mmu04930
ENSMUSG00000041798	Gck	Type II diabetes mellitus:KEGG-mmu04930
ENSMUSG00000039936	Pik3cd	Type II diabetes mellitus:KEGG-mmu04930
ENSMUSG00000007033	Hspa1l	Spliceosome:KEGG-mmu03040
ENSMUSG00000032374	Plod2	Lysine degradation:KEGG-mmu00310
ENSMUSG00000024617	Camk2a	ErbB signaling pathway:KEGG-mmu04012
ENSMUSG00000053819	Camk2d	ErbB signaling pathway:KEGG-mmu04012
ENSMUSG00000041417	Pik3r1	ErbB signaling pathway:KEGG-mmu04012
ENSMUSG00000078816	Prkcc	ErbB signaling pathway:KEGG-mmu04012
ENSMUSG00000021820	Camk2g	ErbB signaling pathway:KEGG-mmu04012
ENSMUSG00000050965	Prkca	ErbB signaling pathway:KEGG-mmu04012
ENSMUSG00000039936	Pik3cd	ErbB signaling pathway:KEGG-mmu04012
ENSMUSG00000026837	Col5a1	ECM-receptor interaction:KEGG-mmu04512
ENSMUSG00000042453	Reln	ECM-receptor interaction:KEGG-mmu04512
ENSMUSG00000055447	Cd47	ECM-receptor interaction:KEGG-mmu04512
ENSMUSG00000041936	Agrn	ECM-receptor interaction:KEGG-mmu04512
ENSMUSG00000027009	Itga4	ECM-receptor interaction:KEGG-mmu04512
ENSMUSG00000000555	Itga5	ECM-receptor interaction:KEGG-mmu04512
ENSMUSG00000024421	Lama3	ECM-receptor interaction:KEGG-mmu04512
ENSMUSG00000005087	Cd44	ECM-receptor interaction:KEGG-mmu04512
ENSMUSG00000026193	Fn1	ECM-receptor interaction:KEGG-mmu04512
ENSMUSG00000002900	Lamb1	ECM-receptor interaction:KEGG-mmu04512
ENSMUSG00000001175	Calm1	Long-term potentiation:KEGG-mmu04720
ENSMUSG00000024617	Camk2a	Long-term potentiation:KEGG-mmu04720
ENSMUSG00000053819	Camk2d	Long-term potentiation:KEGG-mmu04720
ENSMUSG00000036438	Calm2	Long-term potentiation:KEGG-mmu04720
ENSMUSG00000078816	Prkcc	Long-term potentiation:KEGG-mmu04720
ENSMUSG00000022376	Adcy8	Long-term potentiation:KEGG-mmu04720
ENSMUSG00000021820	Camk2g	Long-term potentiation:KEGG-mmu04720
ENSMUSG00000050965	Prkca	Long-term potentiation:KEGG-mmu04720
ENSMUSG00000019370	Calm3	Long-term potentiation:KEGG-mmu04720
ENSMUSG00000033953	Ppp3r1	Long-term potentiation:KEGG-mmu04720
ENSMUSG00000038128	Camk4	Long-term potentiation:KEGG-mmu04720
ENSMUSG00000026959	Grin1	Long-term potentiation:KEGG-mmu04720
ENSMUSG00000020431	Adcy1	Long-term potentiation:KEGG-mmu04720
ENSMUSG00000028161	Ppp3ca	Long-term potentiation:KEGG-mmu04720
ENSMUSG00000005899	Smpd4	Sphingolipid metabolism:KEGG-mmu00600
ENSMUSG00000058927	Gm10053	Tuberculosis:KEGG-mmu05152
ENSMUSG00000001175	Calm1	Tuberculosis:KEGG-mmu05152
ENSMUSG00000022965	Ifngr2	Tuberculosis:KEGG-mmu05152
ENSMUSG00000024617	Camk2a	Tuberculosis:KEGG-mmu05152
ENSMUSG00000053819	Camk2d	Tuberculosis:KEGG-mmu05152
ENSMUSG00000036438	Calm2	Tuberculosis:KEGG-mmu05152
ENSMUSG00000063694	Cycs	Tuberculosis:KEGG-mmu05152
ENSMUSG00000021820	Camk2g	Tuberculosis:KEGG-mmu05152
ENSMUSG00000019370	Calm3	Tuberculosis:KEGG-mmu05152
ENSMUSG00000033953	Ppp3r1	Tuberculosis:KEGG-mmu05152
ENSMUSG00000028161	Ppp3ca	Tuberculosis:KEGG-mmu05152
ENSMUSG00000022965	Ifngr2	Measles:KEGG-mmu05162
ENSMUSG00000041417	Pik3r1	Measles:KEGG-mmu05162
ENSMUSG00000019843	Fyn	Measles:KEGG-mmu05162
ENSMUSG00000039936	Pik3cd	Measles:KEGG-mmu05162
ENSMUSG00000007033	Hspa1l	Measles:KEGG-mmu05162
ENSMUSG00000015143	Actn1	Systemic lupus erythematosus:KEGG-mmu05322
ENSMUSG00000058927	Gm10053	Apoptosis:KEGG-mmu04210
ENSMUSG00000063694	Cycs	Apoptosis:KEGG-mmu04210
ENSMUSG00000041417	Pik3r1	Apoptosis:KEGG-mmu04210
ENSMUSG00000033953	Ppp3r1	Apoptosis:KEGG-mmu04210
ENSMUSG00000039936	Pik3cd	Apoptosis:KEGG-mmu04210
ENSMUSG00000028161	Ppp3ca	Apoptosis:KEGG-mmu04210
ENSMUSG00000022965	Ifngr2	Osteoclast differentiation:KEGG-mmu04380
ENSMUSG00000000440	Pparg	Osteoclast differentiation:KEGG-mmu04380
ENSMUSG00000041417	Pik3r1	Osteoclast differentiation:KEGG-mmu04380
ENSMUSG00000019843	Fyn	Osteoclast differentiation:KEGG-mmu04380
ENSMUSG00000038128	Camk4	Osteoclast differentiation:KEGG-mmu04380
ENSMUSG00000039936	Pik3cd	Osteoclast differentiation:KEGG-mmu04380
ENSMUSG00000028161	Ppp3ca	Osteoclast differentiation:KEGG-mmu04380
ENSMUSG00000039347	Atp6v0e2	Collecting duct acid secretion:KEGG-mmu04966
ENSMUSG00000061731	Ext1	Glycosaminoglycan biosynthesis - heparan sulfate:KEGG-mmu00534
ENSMUSG00000027963	Extl2	Glycosaminoglycan biosynthesis - heparan sulfate:KEGG-mmu00534
ENSMUSG00000021978	Extl3	Glycosaminoglycan biosynthesis - heparan sulfate:KEGG-mmu00534
ENSMUSG00000079037	Prnp	Prion diseases:KEGG-mmu05020
ENSMUSG00000038418	Egr1	Prion diseases:KEGG-mmu05020
ENSMUSG00000019843	Fyn	Prion diseases:KEGG-mmu05020
ENSMUSG00000041417	Pik3r1	T cell receptor signaling pathway:KEGG-mmu04660
ENSMUSG00000033953	Ppp3r1	T cell receptor signaling pathway:KEGG-mmu04660
ENSMUSG00000019843	Fyn	T cell receptor signaling pathway:KEGG-mmu04660
ENSMUSG00000039936	Pik3cd	T cell receptor signaling pathway:KEGG-mmu04660
ENSMUSG00000028161	Ppp3ca	T cell receptor signaling pathway:KEGG-mmu04660
ENSMUSG00000058927	Gm10053	Colorectal cancer:KEGG-mmu05210
ENSMUSG00000063694	Cycs	Colorectal cancer:KEGG-mmu05210
ENSMUSG00000041417	Pik3r1	Colorectal cancer:KEGG-mmu05210
ENSMUSG00000027985	Lef1	Colorectal cancer:KEGG-mmu05210
ENSMUSG00000039936	Pik3cd	Colorectal cancer:KEGG-mmu05210
ENSMUSG00000060534	Dcc	Colorectal cancer:KEGG-mmu05210
ENSMUSG00000027273	Snap25	SNARE interactions in vesicular transport:KEGG-mmu04130
ENSMUSG00000046159	Chrm3	Pancreatic secretion:KEGG-mmu04972
ENSMUSG00000005580	Adcy9	Pancreatic secretion:KEGG-mmu04972
ENSMUSG00000078816	Prkcc	Pancreatic secretion:KEGG-mmu04972
ENSMUSG00000022376	Adcy8	Pancreatic secretion:KEGG-mmu04972
ENSMUSG00000050965	Prkca	Pancreatic secretion:KEGG-mmu04972
ENSMUSG00000020431	Adcy1	Pancreatic secretion:KEGG-mmu04972
ENSMUSG00000026463	Atp2b4	Pancreatic secretion:KEGG-mmu04972
ENSMUSG00000029467	Atp2a2	Pancreatic secretion:KEGG-mmu04972
ENSMUSG00000001175	Calm1	Melanogenesis:KEGG-mmu04916
ENSMUSG00000024617	Camk2a	Melanogenesis:KEGG-mmu04916
ENSMUSG00000007989	Fzd3	Melanogenesis:KEGG-mmu04916
ENSMUSG00000053819	Camk2d	Melanogenesis:KEGG-mmu04916
ENSMUSG00000036438	Calm2	Melanogenesis:KEGG-mmu04916
ENSMUSG00000005580	Adcy9	Melanogenesis:KEGG-mmu04916
ENSMUSG00000078816	Prkcc	Melanogenesis:KEGG-mmu04916
ENSMUSG00000022376	Adcy8	Melanogenesis:KEGG-mmu04916
ENSMUSG00000021820	Camk2g	Melanogenesis:KEGG-mmu04916
ENSMUSG00000027985	Lef1	Melanogenesis:KEGG-mmu04916
ENSMUSG00000050965	Prkca	Melanogenesis:KEGG-mmu04916
ENSMUSG00000019370	Calm3	Melanogenesis:KEGG-mmu04916
ENSMUSG00000019966	Kitl	Melanogenesis:KEGG-mmu04916
ENSMUSG00000020431	Adcy1	Melanogenesis:KEGG-mmu04916
ENSMUSG00000001175	Calm1	Oocyte meiosis:KEGG-mmu04114
ENSMUSG00000024617	Camk2a	Oocyte meiosis:KEGG-mmu04114
ENSMUSG00000053819	Camk2d	Oocyte meiosis:KEGG-mmu04114
ENSMUSG00000018965	Ywhah	Oocyte meiosis:KEGG-mmu04114
ENSMUSG00000036438	Calm2	Oocyte meiosis:KEGG-mmu04114
ENSMUSG00000005580	Adcy9	Oocyte meiosis:KEGG-mmu04114
ENSMUSG00000022376	Adcy8	Oocyte meiosis:KEGG-mmu04114
ENSMUSG00000021820	Camk2g	Oocyte meiosis:KEGG-mmu04114
ENSMUSG00000019370	Calm3	Oocyte meiosis:KEGG-mmu04114
ENSMUSG00000022285	Ywhaz	Oocyte meiosis:KEGG-mmu04114
ENSMUSG00000051391	Ywhag	Oocyte meiosis:KEGG-mmu04114
ENSMUSG00000033953	Ppp3r1	Oocyte meiosis:KEGG-mmu04114
ENSMUSG00000020431	Adcy1	Oocyte meiosis:KEGG-mmu04114
ENSMUSG00000059409	Ppp2r5d	Oocyte meiosis:KEGG-mmu04114
ENSMUSG00000028161	Ppp3ca	Oocyte meiosis:KEGG-mmu04114
ENSMUSG00000022707	Gbe1	Starch and sucrose metabolism:KEGG-mmu00500
ENSMUSG00000041798	Gck	Starch and sucrose metabolism:KEGG-mmu00500
ENSMUSG00000030729	Pgm2l1	Starch and sucrose metabolism:KEGG-mmu00500
ENSMUSG00000030020	Prickle2	Wnt signaling pathway:KEGG-mmu04310
ENSMUSG00000031169	Porcn	Wnt signaling pathway:KEGG-mmu04310
ENSMUSG00000024617	Camk2a	Wnt signaling pathway:KEGG-mmu04310
ENSMUSG00000007989	Fzd3	Wnt signaling pathway:KEGG-mmu04310
ENSMUSG00000053819	Camk2d	Wnt signaling pathway:KEGG-mmu04310
ENSMUSG00000078816	Prkcc	Wnt signaling pathway:KEGG-mmu04310
ENSMUSG00000021820	Camk2g	Wnt signaling pathway:KEGG-mmu04310
ENSMUSG00000027985	Lef1	Wnt signaling pathway:KEGG-mmu04310
ENSMUSG00000050965	Prkca	Wnt signaling pathway:KEGG-mmu04310
ENSMUSG00000017376	Nlk	Wnt signaling pathway:KEGG-mmu04310
ENSMUSG00000027996	Sfrp2	Wnt signaling pathway:KEGG-mmu04310
ENSMUSG00000033953	Ppp3r1	Wnt signaling pathway:KEGG-mmu04310
ENSMUSG00000059409	Ppp2r5d	Wnt signaling pathway:KEGG-mmu04310
ENSMUSG00000028161	Ppp3ca	Wnt signaling pathway:KEGG-mmu04310
ENSMUSG00000005610	Eif4g2	Viral myocarditis:KEGG-mmu05416
ENSMUSG00000058927	Gm10053	Viral myocarditis:KEGG-mmu05416
ENSMUSG00000063694	Cycs	Viral myocarditis:KEGG-mmu05416
ENSMUSG00000019843	Fyn	Viral myocarditis:KEGG-mmu05416
ENSMUSG00000059173	Pde1a	Taste transduction:KEGG-mmu04742
ENSMUSG00000020704	Accn1	Taste transduction:KEGG-mmu04742
ENSMUSG00000022376	Adcy8	Taste transduction:KEGG-mmu04742
ENSMUSG00000020277	Pfkl	Pentose phosphate pathway:KEGG-mmu00030
ENSMUSG00000022861	Dgkg	Glycerophospholipid metabolism:KEGG-mmu00564
ENSMUSG00000036095	Dgkb	Glycerophospholipid metabolism:KEGG-mmu00564
ENSMUSG00000023019	Gpd1	Glycerophospholipid metabolism:KEGG-mmu00564
ENSMUSG00000041417	Pik3r1	Melanoma:KEGG-mmu05218
ENSMUSG00000028864	Hgf	Melanoma:KEGG-mmu05218
ENSMUSG00000031565	Fgfr1	Melanoma:KEGG-mmu05218
ENSMUSG00000022105	Rb1	Melanoma:KEGG-mmu05218
ENSMUSG00000039936	Pik3cd	Melanoma:KEGG-mmu05218
ENSMUSG00000058927	Gm10053	p53 signaling pathway:KEGG-mmu04115
ENSMUSG00000063694	Cycs	p53 signaling pathway:KEGG-mmu04115
ENSMUSG00000075334	Rprm	p53 signaling pathway:KEGG-mmu04115
ENSMUSG00000029385	Ccng2	p53 signaling pathway:KEGG-mmu04115
ENSMUSG00000032615	Nt5m	Nicotinate and nicotinamide metabolism:KEGG-mmu00760
ENSMUSG00000022947	Cbr3	Arachidonic acid metabolism:KEGG-mmu00590
ENSMUSG00000058624	Gda	Purine metabolism:KEGG-mmu00230
ENSMUSG00000005580	Adcy9	Purine metabolism:KEGG-mmu00230
ENSMUSG00000059173	Pde1a	Purine metabolism:KEGG-mmu00230
ENSMUSG00000022376	Adcy8	Purine metabolism:KEGG-mmu00230
ENSMUSG00000032615	Nt5m	Purine metabolism:KEGG-mmu00230
ENSMUSG00000022066	Entpd4	Purine metabolism:KEGG-mmu00230
ENSMUSG00000041624	Gucy1a2	Purine metabolism:KEGG-mmu00230
ENSMUSG00000020431	Adcy1	Purine metabolism:KEGG-mmu00230
ENSMUSG00000041119	Pde9a	Purine metabolism:KEGG-mmu00230
ENSMUSG00000023944	Hsp90ab1	Antigen processing and presentation:KEGG-mmu04612
ENSMUSG00000003814	Calr	Antigen processing and presentation:KEGG-mmu04612
ENSMUSG00000021270	Hsp90aa1	Antigen processing and presentation:KEGG-mmu04612
ENSMUSG00000007033	Hspa1l	Antigen processing and presentation:KEGG-mmu04612
ENSMUSG00000023944	Hsp90ab1	NOD-like receptor signaling pathway:KEGG-mmu04621
ENSMUSG00000021270	Hsp90aa1	NOD-like receptor signaling pathway:KEGG-mmu04621
ENSMUSG00000028864	Hgf	Malaria:KEGG-mmu05144
ENSMUSG00000037872	Darc	Malaria:KEGG-mmu05144
ENSMUSG00000058927	Gm10053	Pathways in cancer:KEGG-mmu05200
ENSMUSG00000007989	Fzd3	Pathways in cancer:KEGG-mmu05200
ENSMUSG00000000440	Pparg	Pathways in cancer:KEGG-mmu05200
ENSMUSG00000023944	Hsp90ab1	Pathways in cancer:KEGG-mmu05200
ENSMUSG00000063694	Cycs	Pathways in cancer:KEGG-mmu05200
ENSMUSG00000041417	Pik3r1	Pathways in cancer:KEGG-mmu05200
ENSMUSG00000078816	Prkcc	Pathways in cancer:KEGG-mmu05200
ENSMUSG00000028864	Hgf	Pathways in cancer:KEGG-mmu05200
ENSMUSG00000027985	Lef1	Pathways in cancer:KEGG-mmu05200
ENSMUSG00000050965	Prkca	Pathways in cancer:KEGG-mmu05200
ENSMUSG00000021270	Hsp90aa1	Pathways in cancer:KEGG-mmu05200
ENSMUSG00000031565	Fgfr1	Pathways in cancer:KEGG-mmu05200
ENSMUSG00000001552	Jup	Pathways in cancer:KEGG-mmu05200
ENSMUSG00000024421	Lama3	Pathways in cancer:KEGG-mmu05200
ENSMUSG00000022105	Rb1	Pathways in cancer:KEGG-mmu05200
ENSMUSG00000021559	Dapk1	Pathways in cancer:KEGG-mmu05200
ENSMUSG00000019966	Kitl	Pathways in cancer:KEGG-mmu05200
ENSMUSG00000039936	Pik3cd	Pathways in cancer:KEGG-mmu05200
ENSMUSG00000060534	Dcc	Pathways in cancer:KEGG-mmu05200
ENSMUSG00000026193	Fn1	Pathways in cancer:KEGG-mmu05200
ENSMUSG00000002900	Lamb1	Pathways in cancer:KEGG-mmu05200
ENSMUSG00000058927	Gm10053	Parkinson's disease:KEGG-mmu05012
ENSMUSG00000063882	Uqcrh	Parkinson's disease:KEGG-mmu05012
ENSMUSG00000020402	Vdac1	Parkinson's disease:KEGG-mmu05012
ENSMUSG00000029223	Uchl1	Parkinson's disease:KEGG-mmu05012
ENSMUSG00000016319	Slc25a5	Parkinson's disease:KEGG-mmu05012
ENSMUSG00000063694	Cycs	Parkinson's disease:KEGG-mmu05012
ENSMUSG00000035885	Cox8a	Parkinson's disease:KEGG-mmu05012
ENSMUSG00000031633	Slc25a4	Parkinson's disease:KEGG-mmu05012
ENSMUSG00000034566	Atp5h	Parkinson's disease:KEGG-mmu05012
ENSMUSG00000027673	Ndufb5	Parkinson's disease:KEGG-mmu05012
ENSMUSG00000029009	Mthfr	One carbon pool by folate:KEGG-mmu00670
ENSMUSG00000023944	Hsp90ab1	Prostate cancer:KEGG-mmu05215
ENSMUSG00000041417	Pik3r1	Prostate cancer:KEGG-mmu05215
ENSMUSG00000027985	Lef1	Prostate cancer:KEGG-mmu05215
ENSMUSG00000021270	Hsp90aa1	Prostate cancer:KEGG-mmu05215
ENSMUSG00000031565	Fgfr1	Prostate cancer:KEGG-mmu05215
ENSMUSG00000022105	Rb1	Prostate cancer:KEGG-mmu05215
ENSMUSG00000039936	Pik3cd	Prostate cancer:KEGG-mmu05215
ENSMUSG00000028224	Nbn	Homologous recombination:KEGG-mmu03440
ENSMUSG00000026688	Mgst3	Metabolism of xenobiotics by cytochrome P450:KEGG-mmu00980
ENSMUSG00000036587	Fut7	Glycosphingolipid biosynthesis - lacto and neolacto series:KEGG-mmu00601
ENSMUSG00000030283	St8sia1	Glycosphingolipid biosynthesis - lacto and neolacto series:KEGG-mmu00601
ENSMUSG00000033849	B3galt2	Glycosphingolipid biosynthesis - lacto and neolacto series:KEGG-mmu00601
ENSMUSG00000034780	B3galt1	Glycosphingolipid biosynthesis - lacto and neolacto series:KEGG-mmu00601
ENSMUSG00000022861	Dgkg	Glycerolipid metabolism:KEGG-mmu00561
ENSMUSG00000036095	Dgkb	Glycerolipid metabolism:KEGG-mmu00561
ENSMUSG00000001642	Akr1b3	Glycerolipid metabolism:KEGG-mmu00561
ENSMUSG00000063882	Uqcrh	Oxidative phosphorylation:KEGG-mmu00190
ENSMUSG00000035885	Cox8a	Oxidative phosphorylation:KEGG-mmu00190
ENSMUSG00000034566	Atp5h	Oxidative phosphorylation:KEGG-mmu00190
ENSMUSG00000027673	Ndufb5	Oxidative phosphorylation:KEGG-mmu00190
ENSMUSG00000039347	Atp6v0e2	Oxidative phosphorylation:KEGG-mmu00190
ENSMUSG00000041417	Pik3r1	Renal cell carcinoma:KEGG-mmu05211
ENSMUSG00000028864	Hgf	Renal cell carcinoma:KEGG-mmu05211
ENSMUSG00000039936	Pik3cd	Renal cell carcinoma:KEGG-mmu05211
ENSMUSG00000041417	Pik3r1	Pancreatic cancer:KEGG-mmu05212
ENSMUSG00000022105	Rb1	Pancreatic cancer:KEGG-mmu05212
ENSMUSG00000039936	Pik3cd	Pancreatic cancer:KEGG-mmu05212
ENSMUSG00000040495	Chrm4	Neuroactive ligand-receptor interaction:KEGG-mmu04080
ENSMUSG00000042429	Adora1	Neuroactive ligand-receptor interaction:KEGG-mmu04080
ENSMUSG00000018589	Glra2	Neuroactive ligand-receptor interaction:KEGG-mmu04080
ENSMUSG00000039579	Grin3a	Neuroactive ligand-receptor interaction:KEGG-mmu04080
ENSMUSG00000046159	Chrm3	Neuroactive ligand-receptor interaction:KEGG-mmu04080
ENSMUSG00000027335	Adra1d	Neuroactive ligand-receptor interaction:KEGG-mmu04080
ENSMUSG00000032528	Vipr1	Neuroactive ligand-receptor interaction:KEGG-mmu04080
ENSMUSG00000001985	Grik3	Neuroactive ligand-receptor interaction:KEGG-mmu04080
ENSMUSG00000021478	Drd1a	Neuroactive ligand-receptor interaction:KEGG-mmu04080
ENSMUSG00000025946	Pth2r	Neuroactive ligand-receptor interaction:KEGG-mmu04080
ENSMUSG00000053004	Hrh1	Neuroactive ligand-receptor interaction:KEGG-mmu04080
ENSMUSG00000025892	Gria4	Neuroactive ligand-receptor interaction:KEGG-mmu04080
ENSMUSG00000023192	Grm2	Neuroactive ligand-receptor interaction:KEGG-mmu04080
ENSMUSG00000038257	Glra3	Neuroactive ligand-receptor interaction:KEGG-mmu04080
ENSMUSG00000003378	Grik5	Neuroactive ligand-receptor interaction:KEGG-mmu04080
ENSMUSG00000034009	Rxfp1	Neuroactive ligand-receptor interaction:KEGG-mmu04080
ENSMUSG00000001986	Gria3	Neuroactive ligand-receptor interaction:KEGG-mmu04080
ENSMUSG00000044933	Sstr3	Neuroactive ligand-receptor interaction:KEGG-mmu04080
ENSMUSG00000000766	Oprm1	Neuroactive ligand-receptor interaction:KEGG-mmu04080
ENSMUSG00000026959	Grin1	Neuroactive ligand-receptor interaction:KEGG-mmu04080
ENSMUSG00000027568	Ntsr1	Neuroactive ligand-receptor interaction:KEGG-mmu04080
ENSMUSG00000041417	Pik3r1	Non-small cell lung cancer:KEGG-mmu05223
ENSMUSG00000078816	Prkcc	Non-small cell lung cancer:KEGG-mmu05223
ENSMUSG00000050965	Prkca	Non-small cell lung cancer:KEGG-mmu05223
ENSMUSG00000022105	Rb1	Non-small cell lung cancer:KEGG-mmu05223
ENSMUSG00000039936	Pik3cd	Non-small cell lung cancer:KEGG-mmu05223
ENSMUSG00000041417	Pik3r1	Carbohydrate digestion and absorption:KEGG-mmu04973
ENSMUSG00000039936	Pik3cd	Carbohydrate digestion and absorption:KEGG-mmu04973
ENSMUSG00000001175	Calm1	Calcium signaling pathway:KEGG-mmu04020
ENSMUSG00000020402	Vdac1	Calcium signaling pathway:KEGG-mmu04020
ENSMUSG00000024617	Camk2a	Calcium signaling pathway:KEGG-mmu04020
ENSMUSG00000046159	Chrm3	Calcium signaling pathway:KEGG-mmu04020
ENSMUSG00000027335	Adra1d	Calcium signaling pathway:KEGG-mmu04020
ENSMUSG00000053819	Camk2d	Calcium signaling pathway:KEGG-mmu04020
ENSMUSG00000036438	Calm2	Calcium signaling pathway:KEGG-mmu04020
ENSMUSG00000005580	Adcy9	Calcium signaling pathway:KEGG-mmu04020
ENSMUSG00000016319	Slc25a5	Calcium signaling pathway:KEGG-mmu04020
ENSMUSG00000021478	Drd1a	Calcium signaling pathway:KEGG-mmu04020
ENSMUSG00000059173	Pde1a	Calcium signaling pathway:KEGG-mmu04020
ENSMUSG00000078816	Prkcc	Calcium signaling pathway:KEGG-mmu04020
ENSMUSG00000053004	Hrh1	Calcium signaling pathway:KEGG-mmu04020
ENSMUSG00000022376	Adcy8	Calcium signaling pathway:KEGG-mmu04020
ENSMUSG00000021820	Camk2g	Calcium signaling pathway:KEGG-mmu04020
ENSMUSG00000050965	Prkca	Calcium signaling pathway:KEGG-mmu04020
ENSMUSG00000019370	Calm3	Calcium signaling pathway:KEGG-mmu04020
ENSMUSG00000022416	Cacna1i	Calcium signaling pathway:KEGG-mmu04020
ENSMUSG00000031633	Slc25a4	Calcium signaling pathway:KEGG-mmu04020
ENSMUSG00000033953	Ppp3r1	Calcium signaling pathway:KEGG-mmu04020
ENSMUSG00000038128	Camk4	Calcium signaling pathway:KEGG-mmu04020
ENSMUSG00000026959	Grin1	Calcium signaling pathway:KEGG-mmu04020
ENSMUSG00000020431	Adcy1	Calcium signaling pathway:KEGG-mmu04020
ENSMUSG00000026463	Atp2b4	Calcium signaling pathway:KEGG-mmu04020
ENSMUSG00000027568	Ntsr1	Calcium signaling pathway:KEGG-mmu04020
ENSMUSG00000029467	Atp2a2	Calcium signaling pathway:KEGG-mmu04020
ENSMUSG00000028161	Ppp3ca	Calcium signaling pathway:KEGG-mmu04020
ENSMUSG00000039579	Grin3a	Glutamatergic synapse:KEGG-mmu04724
ENSMUSG00000001985	Grik3	Glutamatergic synapse:KEGG-mmu04724
ENSMUSG00000005580	Adcy9	Glutamatergic synapse:KEGG-mmu04724
ENSMUSG00000078816	Prkcc	Glutamatergic synapse:KEGG-mmu04724
ENSMUSG00000025892	Gria4	Glutamatergic synapse:KEGG-mmu04724
ENSMUSG00000022376	Adcy8	Glutamatergic synapse:KEGG-mmu04724
ENSMUSG00000023192	Grm2	Glutamatergic synapse:KEGG-mmu04724
ENSMUSG00000030500	Slc17a6	Glutamatergic synapse:KEGG-mmu04724
ENSMUSG00000026103	Gls	Glutamatergic synapse:KEGG-mmu04724
ENSMUSG00000050965	Prkca	Glutamatergic synapse:KEGG-mmu04724
ENSMUSG00000003378	Grik5	Glutamatergic synapse:KEGG-mmu04724
ENSMUSG00000001986	Gria3	Glutamatergic synapse:KEGG-mmu04724
ENSMUSG00000033953	Ppp3r1	Glutamatergic synapse:KEGG-mmu04724
ENSMUSG00000026959	Grin1	Glutamatergic synapse:KEGG-mmu04724
ENSMUSG00000020431	Adcy1	Glutamatergic synapse:KEGG-mmu04724
ENSMUSG00000070570	Slc17a7	Glutamatergic synapse:KEGG-mmu04724
ENSMUSG00000048240	Gng7	Glutamatergic synapse:KEGG-mmu04724
ENSMUSG00000028161	Ppp3ca	Glutamatergic synapse:KEGG-mmu04724
ENSMUSG00000005610	Eif4g2	RNA transport:KEGG-mmu03013
ENSMUSG00000006941	Eif1b	RNA transport:KEGG-mmu03013
ENSMUSG00000005580	Adcy9	Endocrine and other factor-regulated calcium reabsorption:KEGG-mmu04961
ENSMUSG00000078816	Prkcc	Endocrine and other factor-regulated calcium reabsorption:KEGG-mmu04961
ENSMUSG00000050965	Prkca	Endocrine and other factor-regulated calcium reabsorption:KEGG-mmu04961
ENSMUSG00000028222	Calb1	Endocrine and other factor-regulated calcium reabsorption:KEGG-mmu04961
ENSMUSG00000041417	Pik3r1	Bacterial invasion of epithelial cells:KEGG-mmu05100
ENSMUSG00000000555	Itga5	Bacterial invasion of epithelial cells:KEGG-mmu05100
ENSMUSG00000039936	Pik3cd	Bacterial invasion of epithelial cells:KEGG-mmu05100
ENSMUSG00000026193	Fn1	Bacterial invasion of epithelial cells:KEGG-mmu05100
ENSMUSG00000058927	Gm10053	Alzheimer's disease:KEGG-mmu05010
ENSMUSG00000063882	Uqcrh	Alzheimer's disease:KEGG-mmu05010
ENSMUSG00000001175	Calm1	Alzheimer's disease:KEGG-mmu05010
ENSMUSG00000036438	Calm2	Alzheimer's disease:KEGG-mmu05010
ENSMUSG00000063694	Cycs	Alzheimer's disease:KEGG-mmu05010
ENSMUSG00000054693	Adam10	Alzheimer's disease:KEGG-mmu05010
ENSMUSG00000035885	Cox8a	Alzheimer's disease:KEGG-mmu05010
ENSMUSG00000019370	Calm3	Alzheimer's disease:KEGG-mmu05010
ENSMUSG00000034566	Atp5h	Alzheimer's disease:KEGG-mmu05010
ENSMUSG00000027673	Ndufb5	Alzheimer's disease:KEGG-mmu05010
ENSMUSG00000033953	Ppp3r1	Alzheimer's disease:KEGG-mmu05010
ENSMUSG00000026959	Grin1	Alzheimer's disease:KEGG-mmu05010
ENSMUSG00000029467	Atp2a2	Alzheimer's disease:KEGG-mmu05010
ENSMUSG00000028161	Ppp3ca	Alzheimer's disease:KEGG-mmu05010
ENSMUSG00000024782	Ak3	Pyrimidine metabolism:KEGG-mmu00240
ENSMUSG00000032615	Nt5m	Pyrimidine metabolism:KEGG-mmu00240
ENSMUSG00000022066	Entpd4	Pyrimidine metabolism:KEGG-mmu00240
ENSMUSG00000020638	Cmpk2	Pyrimidine metabolism:KEGG-mmu00240
ENSMUSG00000041417	Pik3r1	Leukocyte transendothelial migration:KEGG-mmu04670
ENSMUSG00000027009	Itga4	Leukocyte transendothelial migration:KEGG-mmu04670
ENSMUSG00000078816	Prkcc	Leukocyte transendothelial migration:KEGG-mmu04670
ENSMUSG00000050965	Prkca	Leukocyte transendothelial migration:KEGG-mmu04670
ENSMUSG00000015143	Actn1	Leukocyte transendothelial migration:KEGG-mmu04670
ENSMUSG00000022512	Cldn1	Leukocyte transendothelial migration:KEGG-mmu04670
ENSMUSG00000039936	Pik3cd	Leukocyte transendothelial migration:KEGG-mmu04670
ENSMUSG00000001175	Calm1	Gastric acid secretion:KEGG-mmu04971
ENSMUSG00000024617	Camk2a	Gastric acid secretion:KEGG-mmu04971
ENSMUSG00000046159	Chrm3	Gastric acid secretion:KEGG-mmu04971
ENSMUSG00000053819	Camk2d	Gastric acid secretion:KEGG-mmu04971
ENSMUSG00000036438	Calm2	Gastric acid secretion:KEGG-mmu04971
ENSMUSG00000005580	Adcy9	Gastric acid secretion:KEGG-mmu04971
ENSMUSG00000078816	Prkcc	Gastric acid secretion:KEGG-mmu04971
ENSMUSG00000022376	Adcy8	Gastric acid secretion:KEGG-mmu04971
ENSMUSG00000021820	Camk2g	Gastric acid secretion:KEGG-mmu04971
ENSMUSG00000050965	Prkca	Gastric acid secretion:KEGG-mmu04971
ENSMUSG00000019370	Calm3	Gastric acid secretion:KEGG-mmu04971
ENSMUSG00000041695	Kcnj2	Gastric acid secretion:KEGG-mmu04971
ENSMUSG00000020431	Adcy1	Gastric acid secretion:KEGG-mmu04971
ENSMUSG00000033854	Kcnk10	Gastric acid secretion:KEGG-mmu04971
ENSMUSG00000027009	Itga4	Hematopoietic cell lineage:KEGG-mmu04640
ENSMUSG00000047139	Cd24a	Hematopoietic cell lineage:KEGG-mmu04640
ENSMUSG00000000555	Itga5	Hematopoietic cell lineage:KEGG-mmu04640
ENSMUSG00000005087	Cd44	Hematopoietic cell lineage:KEGG-mmu04640
ENSMUSG00000016494	Cd34	Hematopoietic cell lineage:KEGG-mmu04640
ENSMUSG00000019966	Kitl	Hematopoietic cell lineage:KEGG-mmu04640
ENSMUSG00000073888	Ccl27a	Cytokine-cytokine receptor interaction:KEGG-mmu04060
ENSMUSG00000022965	Ifngr2	Cytokine-cytokine receptor interaction:KEGG-mmu04060
ENSMUSG00000028864	Hgf	Cytokine-cytokine receptor interaction:KEGG-mmu04060
ENSMUSG00000019966	Kitl	Cytokine-cytokine receptor interaction:KEGG-mmu04060
ENSMUSG00000054263	Lifr	Cytokine-cytokine receptor interaction:KEGG-mmu04060
ENSMUSG00000030935	Acsm3	Butanoate metabolism:KEGG-mmu00650
ENSMUSG00000026202	Tuba4a	Phagosome:KEGG-mmu04145
ENSMUSG00000003814	Calr	Phagosome:KEGG-mmu04145
ENSMUSG00000000555	Itga5	Phagosome:KEGG-mmu04145
ENSMUSG00000039347	Atp6v0e2	Phagosome:KEGG-mmu04145
ENSMUSG00000022377	Asap1	Fc gamma R-mediated phagocytosis:KEGG-mmu04666
ENSMUSG00000041417	Pik3r1	Fc gamma R-mediated phagocytosis:KEGG-mmu04666
ENSMUSG00000078816	Prkcc	Fc gamma R-mediated phagocytosis:KEGG-mmu04666
ENSMUSG00000050965	Prkca	Fc gamma R-mediated phagocytosis:KEGG-mmu04666
ENSMUSG00000021314	Amph	Fc gamma R-mediated phagocytosis:KEGG-mmu04666
ENSMUSG00000039936	Pik3cd	Fc gamma R-mediated phagocytosis:KEGG-mmu04666
ENSMUSG00000001175	Calm1	Insulin signaling pathway:KEGG-mmu04910
ENSMUSG00000036438	Calm2	Insulin signaling pathway:KEGG-mmu04910
ENSMUSG00000041417	Pik3r1	Insulin signaling pathway:KEGG-mmu04910
ENSMUSG00000019370	Calm3	Insulin signaling pathway:KEGG-mmu04910
ENSMUSG00000041798	Gck	Insulin signaling pathway:KEGG-mmu04910
ENSMUSG00000038205	Prkab2	Insulin signaling pathway:KEGG-mmu04910
ENSMUSG00000039936	Pik3cd	Insulin signaling pathway:KEGG-mmu04910
ENSMUSG00000058927	Gm10053	Small cell lung cancer:KEGG-mmu05222
ENSMUSG00000063694	Cycs	Small cell lung cancer:KEGG-mmu05222
ENSMUSG00000041417	Pik3r1	Small cell lung cancer:KEGG-mmu05222
ENSMUSG00000024421	Lama3	Small cell lung cancer:KEGG-mmu05222
ENSMUSG00000022105	Rb1	Small cell lung cancer:KEGG-mmu05222
ENSMUSG00000039936	Pik3cd	Small cell lung cancer:KEGG-mmu05222
ENSMUSG00000026193	Fn1	Small cell lung cancer:KEGG-mmu05222
ENSMUSG00000002900	Lamb1	Small cell lung cancer:KEGG-mmu05222
ENSMUSG00000041417	Pik3r1	mTOR signaling pathway:KEGG-mmu04150
ENSMUSG00000039936	Pik3cd	mTOR signaling pathway:KEGG-mmu04150
ENSMUSG00000040495	Chrm4	Regulation of actin cytoskeleton:KEGG-mmu04810
ENSMUSG00000046159	Chrm3	Regulation of actin cytoskeleton:KEGG-mmu04810
ENSMUSG00000026782	Abi2	Regulation of actin cytoskeleton:KEGG-mmu04810
ENSMUSG00000041417	Pik3r1	Regulation of actin cytoskeleton:KEGG-mmu04810
ENSMUSG00000027009	Itga4	Regulation of actin cytoskeleton:KEGG-mmu04810
ENSMUSG00000032470	Mras	Regulation of actin cytoskeleton:KEGG-mmu04810
ENSMUSG00000031565	Fgfr1	Regulation of actin cytoskeleton:KEGG-mmu04810
ENSMUSG00000000555	Itga5	Regulation of actin cytoskeleton:KEGG-mmu04810
ENSMUSG00000015143	Actn1	Regulation of actin cytoskeleton:KEGG-mmu04810
ENSMUSG00000025372	Baiap2	Regulation of actin cytoskeleton:KEGG-mmu04810
ENSMUSG00000039936	Pik3cd	Regulation of actin cytoskeleton:KEGG-mmu04810
ENSMUSG00000026193	Fn1	Regulation of actin cytoskeleton:KEGG-mmu04810
ENSMUSG00000027009	Itga4	Hypertrophic cardiomyopathy (HCM):KEGG-mmu05410
ENSMUSG00000053395	Cacng8	Hypertrophic cardiomyopathy (HCM):KEGG-mmu05410
ENSMUSG00000000555	Itga5	Hypertrophic cardiomyopathy (HCM):KEGG-mmu05410
ENSMUSG00000032366	Tpm1	Hypertrophic cardiomyopathy (HCM):KEGG-mmu05410
ENSMUSG00000021991	Cacna2d3	Hypertrophic cardiomyopathy (HCM):KEGG-mmu05410
ENSMUSG00000038205	Prkab2	Hypertrophic cardiomyopathy (HCM):KEGG-mmu05410
ENSMUSG00000017412	Cacnb4	Hypertrophic cardiomyopathy (HCM):KEGG-mmu05410
ENSMUSG00000066189	Cacng3	Hypertrophic cardiomyopathy (HCM):KEGG-mmu05410
ENSMUSG00000029467	Atp2a2	Hypertrophic cardiomyopathy (HCM):KEGG-mmu05410
ENSMUSG00000041417	Pik3r1	Aldosterone-regulated sodium reabsorption:KEGG-mmu04960
ENSMUSG00000078816	Prkcc	Aldosterone-regulated sodium reabsorption:KEGG-mmu04960
ENSMUSG00000050965	Prkca	Aldosterone-regulated sodium reabsorption:KEGG-mmu04960
ENSMUSG00000039936	Pik3cd	Aldosterone-regulated sodium reabsorption:KEGG-mmu04960
ENSMUSG00000022965	Ifngr2	Leishmaniasis:KEGG-mmu05140
ENSMUSG00000027009	Itga4	Leishmaniasis:KEGG-mmu05140
ENSMUSG00000022309	Angpt1	Rheumatoid arthritis:KEGG-mmu05323
ENSMUSG00000039347	Atp6v0e2	Rheumatoid arthritis:KEGG-mmu05323
ENSMUSG00000006958	Chrd	TGF-beta signaling pathway:KEGG-mmu04350
ENSMUSG00000066652	Lefty2	TGF-beta signaling pathway:KEGG-mmu04350
ENSMUSG00000022965	Ifngr2	Natural killer cell mediated cytotoxicity:KEGG-mmu04650
ENSMUSG00000041417	Pik3r1	Natural killer cell mediated cytotoxicity:KEGG-mmu04650
ENSMUSG00000078816	Prkcc	Natural killer cell mediated cytotoxicity:KEGG-mmu04650
ENSMUSG00000050965	Prkca	Natural killer cell mediated cytotoxicity:KEGG-mmu04650
ENSMUSG00000033953	Ppp3r1	Natural killer cell mediated cytotoxicity:KEGG-mmu04650
ENSMUSG00000019843	Fyn	Natural killer cell mediated cytotoxicity:KEGG-mmu04650
ENSMUSG00000039936	Pik3cd	Natural killer cell mediated cytotoxicity:KEGG-mmu04650
ENSMUSG00000028161	Ppp3ca	Natural killer cell mediated cytotoxicity:KEGG-mmu04650
ENSMUSG00000030189	Csda	Tight junction:KEGG-mmu04530
ENSMUSG00000078816	Prkcc	Tight junction:KEGG-mmu04530
ENSMUSG00000032470	Mras	Tight junction:KEGG-mmu04530
ENSMUSG00000050965	Prkca	Tight junction:KEGG-mmu04530
ENSMUSG00000045095	Magi1	Tight junction:KEGG-mmu04530
ENSMUSG00000015143	Actn1	Tight junction:KEGG-mmu04530
ENSMUSG00000022512	Cldn1	Tight junction:KEGG-mmu04530
ENSMUSG00000041417	Pik3r1	Chronic myeloid leukemia:KEGG-mmu05220
ENSMUSG00000022105	Rb1	Chronic myeloid leukemia:KEGG-mmu05220
ENSMUSG00000039936	Pik3cd	Chronic myeloid leukemia:KEGG-mmu05220
ENSMUSG00000038886	Man2a2	N-Glycan biosynthesis:KEGG-mmu00510
ENSMUSG00000003746	Man1a	N-Glycan biosynthesis:KEGG-mmu00510
ENSMUSG00000026856	Dolpp1	N-Glycan biosynthesis:KEGG-mmu00510
ENSMUSG00000026103	Gls	Alanine, aspartate and glutamate metabolism:KEGG-mmu00250
ENSMUSG00000031672	Got2	Alanine, aspartate and glutamate metabolism:KEGG-mmu00250
ENSMUSG00000032306	Mpi	Amino sugar and nucleotide sugar metabolism:KEGG-mmu00520
ENSMUSG00000041798	Gck	Amino sugar and nucleotide sugar metabolism:KEGG-mmu00520
ENSMUSG00000026456	Cyb5r1	Amino sugar and nucleotide sugar metabolism:KEGG-mmu00520
ENSMUSG00000041417	Pik3r1	Hepatitis C:KEGG-mmu05160
ENSMUSG00000022512	Cldn1	Hepatitis C:KEGG-mmu05160
ENSMUSG00000039936	Pik3cd	Hepatitis C:KEGG-mmu05160
ENSMUSG00000001642	Akr1b3	Pyruvate metabolism:KEGG-mmu00620
ENSMUSG00000041798	Gck	Maturity onset diabetes of the young:KEGG-mmu04950
ENSMUSG00000021259	Cyp46a1	Primary bile acid biosynthesis:KEGG-mmu00120
ENSMUSG00000002799	Jag2	Notch signaling pathway:KEGG-mmu04330
ENSMUSG00000032332	Col12a1	Protein digestion and absorption:KEGG-mmu04974
ENSMUSG00000026837	Col5a1	Protein digestion and absorption:KEGG-mmu04974
ENSMUSG00000061119	Prcp	Protein digestion and absorption:KEGG-mmu04974
ENSMUSG00000037940	Inpp4b	Inositol phosphate metabolism:KEGG-mmu00562
ENSMUSG00000039936	Pik3cd	Inositol phosphate metabolism:KEGG-mmu00562
ENSMUSG00000041417	Pik3r1	B cell receptor signaling pathway:KEGG-mmu04662
ENSMUSG00000033953	Ppp3r1	B cell receptor signaling pathway:KEGG-mmu04662
ENSMUSG00000039936	Pik3cd	B cell receptor signaling pathway:KEGG-mmu04662
ENSMUSG00000028161	Ppp3ca	B cell receptor signaling pathway:KEGG-mmu04662
ENSMUSG00000001175	Calm1	Phototransduction:KEGG-mmu04744
ENSMUSG00000036438	Calm2	Phototransduction:KEGG-mmu04744
ENSMUSG00000019370	Calm3	Phototransduction:KEGG-mmu04744
ENSMUSG00000018909	Arrb1	Phototransduction:KEGG-mmu04744
ENSMUSG00000026103	Gls	D-Glutamine and D-glutamate metabolism:KEGG-mmu00471
ENSMUSG00000001175	Calm1	Glioma:KEGG-mmu05214
ENSMUSG00000024617	Camk2a	Glioma:KEGG-mmu05214
ENSMUSG00000053819	Camk2d	Glioma:KEGG-mmu05214
ENSMUSG00000036438	Calm2	Glioma:KEGG-mmu05214
ENSMUSG00000041417	Pik3r1	Glioma:KEGG-mmu05214
ENSMUSG00000078816	Prkcc	Glioma:KEGG-mmu05214
ENSMUSG00000021820	Camk2g	Glioma:KEGG-mmu05214
ENSMUSG00000050965	Prkca	Glioma:KEGG-mmu05214
ENSMUSG00000019370	Calm3	Glioma:KEGG-mmu05214
ENSMUSG00000022105	Rb1	Glioma:KEGG-mmu05214
ENSMUSG00000039936	Pik3cd	Glioma:KEGG-mmu05214
ENSMUSG00000006818	Sod2	Peroxisome:KEGG-mmu04146
ENSMUSG00000027222	Pex16	Peroxisome:KEGG-mmu04146
ENSMUSG00000026837	Col5a1	Amoebiasis:KEGG-mmu05146
ENSMUSG00000041417	Pik3r1	Amoebiasis:KEGG-mmu05146
ENSMUSG00000078816	Prkcc	Amoebiasis:KEGG-mmu05146
ENSMUSG00000050965	Prkca	Amoebiasis:KEGG-mmu05146
ENSMUSG00000015143	Actn1	Amoebiasis:KEGG-mmu05146
ENSMUSG00000024421	Lama3	Amoebiasis:KEGG-mmu05146
ENSMUSG00000039936	Pik3cd	Amoebiasis:KEGG-mmu05146
ENSMUSG00000021125	Arg2	Amoebiasis:KEGG-mmu05146
ENSMUSG00000020431	Adcy1	Amoebiasis:KEGG-mmu05146
ENSMUSG00000026193	Fn1	Amoebiasis:KEGG-mmu05146
ENSMUSG00000002900	Lamb1	Amoebiasis:KEGG-mmu05146
ENSMUSG00000073888	Ccl27a	Intestinal immune network for IgA production:KEGG-mmu04672
ENSMUSG00000027009	Itga4	Intestinal immune network for IgA production:KEGG-mmu04672
ENSMUSG00000026688	Mgst3	Glutathione metabolism:KEGG-mmu00480
ENSMUSG00000027009	Itga4	Arrhythmogenic right ventricular cardiomyopathy (ARVC):KEGG-mmu05412
ENSMUSG00000053395	Cacng8	Arrhythmogenic right ventricular cardiomyopathy (ARVC):KEGG-mmu05412
ENSMUSG00000027985	Lef1	Arrhythmogenic right ventricular cardiomyopathy (ARVC):KEGG-mmu05412
ENSMUSG00000000555	Itga5	Arrhythmogenic right ventricular cardiomyopathy (ARVC):KEGG-mmu05412
ENSMUSG00000015143	Actn1	Arrhythmogenic right ventricular cardiomyopathy (ARVC):KEGG-mmu05412
ENSMUSG00000001552	Jup	Arrhythmogenic right ventricular cardiomyopathy (ARVC):KEGG-mmu05412
ENSMUSG00000021991	Cacna2d3	Arrhythmogenic right ventricular cardiomyopathy (ARVC):KEGG-mmu05412
ENSMUSG00000017412	Cacnb4	Arrhythmogenic right ventricular cardiomyopathy (ARVC):KEGG-mmu05412
ENSMUSG00000066189	Cacng3	Arrhythmogenic right ventricular cardiomyopathy (ARVC):KEGG-mmu05412
ENSMUSG00000029467	Atp2a2	Arrhythmogenic right ventricular cardiomyopathy (ARVC):KEGG-mmu05412
ENSMUSG00000022965	Ifngr2	Jak-STAT signaling pathway:KEGG-mmu04630
ENSMUSG00000041417	Pik3r1	Jak-STAT signaling pathway:KEGG-mmu04630
ENSMUSG00000039936	Pik3cd	Jak-STAT signaling pathway:KEGG-mmu04630
ENSMUSG00000054263	Lifr	Jak-STAT signaling pathway:KEGG-mmu04630
ENSMUSG00000027330	Cdc25b	Cell cycle:KEGG-mmu04110
ENSMUSG00000018965	Ywhah	Cell cycle:KEGG-mmu04110
ENSMUSG00000022285	Ywhaz	Cell cycle:KEGG-mmu04110
ENSMUSG00000022105	Rb1	Cell cycle:KEGG-mmu04110
ENSMUSG00000051391	Ywhag	Cell cycle:KEGG-mmu04110
ENSMUSG00000005580	Adcy9	Dilated cardiomyopathy:KEGG-mmu05414
ENSMUSG00000027009	Itga4	Dilated cardiomyopathy:KEGG-mmu05414
ENSMUSG00000053395	Cacng8	Dilated cardiomyopathy:KEGG-mmu05414
ENSMUSG00000022376	Adcy8	Dilated cardiomyopathy:KEGG-mmu05414
ENSMUSG00000000555	Itga5	Dilated cardiomyopathy:KEGG-mmu05414
ENSMUSG00000032366	Tpm1	Dilated cardiomyopathy:KEGG-mmu05414
ENSMUSG00000021991	Cacna2d3	Dilated cardiomyopathy:KEGG-mmu05414
ENSMUSG00000020431	Adcy1	Dilated cardiomyopathy:KEGG-mmu05414
ENSMUSG00000017412	Cacnb4	Dilated cardiomyopathy:KEGG-mmu05414
ENSMUSG00000066189	Cacng3	Dilated cardiomyopathy:KEGG-mmu05414
ENSMUSG00000029467	Atp2a2	Dilated cardiomyopathy:KEGG-mmu05414
ENSMUSG00000031672	Got2	Fat digestion and absorption:KEGG-mmu04975
ENSMUSG00000023830	Igf2r	Lysosome:KEGG-mmu04142
ENSMUSG00000016256	Ctsz	Lysosome:KEGG-mmu04142
ENSMUSG00000004849	Ap1s1	Lysosome:KEGG-mmu04142
ENSMUSG00000068747	Sort1	Lysosome:KEGG-mmu04142
ENSMUSG00000022066	Entpd4	Lysosome:KEGG-mmu04142
ENSMUSG00000033307	Mif	Tyrosine metabolism:KEGG-mmu00350
ENSMUSG00000031672	Got2	Tyrosine metabolism:KEGG-mmu00350
ENSMUSG00000027330	Cdc25b	Progesterone-mediated oocyte maturation:KEGG-mmu04914
ENSMUSG00000023944	Hsp90ab1	Progesterone-mediated oocyte maturation:KEGG-mmu04914
ENSMUSG00000005580	Adcy9	Progesterone-mediated oocyte maturation:KEGG-mmu04914
ENSMUSG00000041417	Pik3r1	Progesterone-mediated oocyte maturation:KEGG-mmu04914
ENSMUSG00000022376	Adcy8	Progesterone-mediated oocyte maturation:KEGG-mmu04914
ENSMUSG00000021270	Hsp90aa1	Progesterone-mediated oocyte maturation:KEGG-mmu04914
ENSMUSG00000039936	Pik3cd	Progesterone-mediated oocyte maturation:KEGG-mmu04914
ENSMUSG00000020431	Adcy1	Progesterone-mediated oocyte maturation:KEGG-mmu04914
ENSMUSG00000026204	Ptprn	Type I diabetes mellitus:KEGG-mmu04940
ENSMUSG00000052920	Prkg1	Long-term depression:KEGG-mmu04730
ENSMUSG00000078816	Prkcc	Long-term depression:KEGG-mmu04730
ENSMUSG00000050965	Prkca	Long-term depression:KEGG-mmu04730
ENSMUSG00000001986	Gria3	Long-term depression:KEGG-mmu04730
ENSMUSG00000041624	Gucy1a2	Long-term depression:KEGG-mmu04730
ENSMUSG00000058927	Gm10053	Toxoplasmosis:KEGG-mmu05145
ENSMUSG00000022965	Ifngr2	Toxoplasmosis:KEGG-mmu05145
ENSMUSG00000063694	Cycs	Toxoplasmosis:KEGG-mmu05145
ENSMUSG00000041417	Pik3r1	Toxoplasmosis:KEGG-mmu05145
ENSMUSG00000024421	Lama3	Toxoplasmosis:KEGG-mmu05145
ENSMUSG00000039936	Pik3cd	Toxoplasmosis:KEGG-mmu05145
ENSMUSG00000002900	Lamb1	Toxoplasmosis:KEGG-mmu05145
ENSMUSG00000007033	Hspa1l	Toxoplasmosis:KEGG-mmu05145
ENSMUSG00000041417	Pik3r1	Fc epsilon RI signaling pathway:KEGG-mmu04664
ENSMUSG00000050965	Prkca	Fc epsilon RI signaling pathway:KEGG-mmu04664
ENSMUSG00000019843	Fyn	Fc epsilon RI signaling pathway:KEGG-mmu04664
ENSMUSG00000039936	Pik3cd	Fc epsilon RI signaling pathway:KEGG-mmu04664
ENSMUSG00000078816	Prkcc	African trypanosomiasis:KEGG-mmu05143
ENSMUSG00000050965	Prkca	African trypanosomiasis:KEGG-mmu05143
ENSMUSG00000026103	Gls	Nitrogen metabolism:KEGG-mmu00910
ENSMUSG00000001175	Calm1	Salivary secretion:KEGG-mmu04970
ENSMUSG00000046159	Chrm3	Salivary secretion:KEGG-mmu04970
ENSMUSG00000027335	Adra1d	Salivary secretion:KEGG-mmu04970
ENSMUSG00000052920	Prkg1	Salivary secretion:KEGG-mmu04970
ENSMUSG00000036438	Calm2	Salivary secretion:KEGG-mmu04970
ENSMUSG00000005580	Adcy9	Salivary secretion:KEGG-mmu04970
ENSMUSG00000078816	Prkcc	Salivary secretion:KEGG-mmu04970
ENSMUSG00000022376	Adcy8	Salivary secretion:KEGG-mmu04970
ENSMUSG00000050965	Prkca	Salivary secretion:KEGG-mmu04970
ENSMUSG00000019370	Calm3	Salivary secretion:KEGG-mmu04970
ENSMUSG00000041624	Gucy1a2	Salivary secretion:KEGG-mmu04970
ENSMUSG00000020431	Adcy1	Salivary secretion:KEGG-mmu04970
ENSMUSG00000026463	Atp2b4	Salivary secretion:KEGG-mmu04970
ENSMUSG00000021822	Plau	Complement and coagulation cascades:KEGG-mmu04610
ENSMUSG00000001175	Calm1	Phosphatidylinositol signaling system:KEGG-mmu04070
ENSMUSG00000022861	Dgkg	Phosphatidylinositol signaling system:KEGG-mmu04070
ENSMUSG00000036438	Calm2	Phosphatidylinositol signaling system:KEGG-mmu04070
ENSMUSG00000041417	Pik3r1	Phosphatidylinositol signaling system:KEGG-mmu04070
ENSMUSG00000078816	Prkcc	Phosphatidylinositol signaling system:KEGG-mmu04070
ENSMUSG00000036095	Dgkb	Phosphatidylinositol signaling system:KEGG-mmu04070
ENSMUSG00000050965	Prkca	Phosphatidylinositol signaling system:KEGG-mmu04070
ENSMUSG00000019370	Calm3	Phosphatidylinositol signaling system:KEGG-mmu04070
ENSMUSG00000037940	Inpp4b	Phosphatidylinositol signaling system:KEGG-mmu04070
ENSMUSG00000039936	Pik3cd	Phosphatidylinositol signaling system:KEGG-mmu04070
ENSMUSG00000001175	Calm1	Neurotrophin signaling pathway:KEGG-mmu04722
ENSMUSG00000024617	Camk2a	Neurotrophin signaling pathway:KEGG-mmu04722
ENSMUSG00000053819	Camk2d	Neurotrophin signaling pathway:KEGG-mmu04722
ENSMUSG00000018965	Ywhah	Neurotrophin signaling pathway:KEGG-mmu04722
ENSMUSG00000036438	Calm2	Neurotrophin signaling pathway:KEGG-mmu04722
ENSMUSG00000041417	Pik3r1	Neurotrophin signaling pathway:KEGG-mmu04722
ENSMUSG00000049107	Ntf3	Neurotrophin signaling pathway:KEGG-mmu04722
ENSMUSG00000068747	Sort1	Neurotrophin signaling pathway:KEGG-mmu04722
ENSMUSG00000021820	Camk2g	Neurotrophin signaling pathway:KEGG-mmu04722
ENSMUSG00000019370	Calm3	Neurotrophin signaling pathway:KEGG-mmu04722
ENSMUSG00000022285	Ywhaz	Neurotrophin signaling pathway:KEGG-mmu04722
ENSMUSG00000051391	Ywhag	Neurotrophin signaling pathway:KEGG-mmu04722
ENSMUSG00000038128	Camk4	Neurotrophin signaling pathway:KEGG-mmu04722
ENSMUSG00000039936	Pik3cd	Neurotrophin signaling pathway:KEGG-mmu04722
ENSMUSG00000048482	Bdnf	Neurotrophin signaling pathway:KEGG-mmu04722
ENSMUSG00000001175	Calm1	Vascular smooth muscle contraction:KEGG-mmu04270
ENSMUSG00000027335	Adra1d	Vascular smooth muscle contraction:KEGG-mmu04270
ENSMUSG00000052920	Prkg1	Vascular smooth muscle contraction:KEGG-mmu04270
ENSMUSG00000036438	Calm2	Vascular smooth muscle contraction:KEGG-mmu04270
ENSMUSG00000005580	Adcy9	Vascular smooth muscle contraction:KEGG-mmu04270
ENSMUSG00000078816	Prkcc	Vascular smooth muscle contraction:KEGG-mmu04270
ENSMUSG00000022376	Adcy8	Vascular smooth muscle contraction:KEGG-mmu04270
ENSMUSG00000054934	Kcnmb4	Vascular smooth muscle contraction:KEGG-mmu04270
ENSMUSG00000050965	Prkca	Vascular smooth muscle contraction:KEGG-mmu04270
ENSMUSG00000019370	Calm3	Vascular smooth muscle contraction:KEGG-mmu04270
ENSMUSG00000041624	Gucy1a2	Vascular smooth muscle contraction:KEGG-mmu04270
ENSMUSG00000020431	Adcy1	Vascular smooth muscle contraction:KEGG-mmu04270
ENSMUSG00000027533	Fabp5	PPAR signaling pathway:KEGG-mmu03320
ENSMUSG00000000440	Pparg	PPAR signaling pathway:KEGG-mmu03320
ENSMUSG00000039037	St6galnac5	Glycosphingolipid biosynthesis - ganglio series:KEGG-mmu00604
ENSMUSG00000030283	St8sia1	Glycosphingolipid biosynthesis - ganglio series:KEGG-mmu00604
ENSMUSG00000013846	St3gal1	Glycosphingolipid biosynthesis - ganglio series:KEGG-mmu00604
ENSMUSG00000039474	Wfs1	Protein processing in endoplasmic reticulum:KEGG-mmu04141
ENSMUSG00000020964	Sel1l	Protein processing in endoplasmic reticulum:KEGG-mmu04141
ENSMUSG00000057069	Ero1lb	Protein processing in endoplasmic reticulum:KEGG-mmu04141
ENSMUSG00000023944	Hsp90ab1	Protein processing in endoplasmic reticulum:KEGG-mmu04141
ENSMUSG00000025757	Hspa4l	Protein processing in endoplasmic reticulum:KEGG-mmu04141
ENSMUSG00000041556	Fbxo2	Protein processing in endoplasmic reticulum:KEGG-mmu04141
ENSMUSG00000003814	Calr	Protein processing in endoplasmic reticulum:KEGG-mmu04141
ENSMUSG00000021270	Hsp90aa1	Protein processing in endoplasmic reticulum:KEGG-mmu04141
ENSMUSG00000030104	Edem1	Protein processing in endoplasmic reticulum:KEGG-mmu04141
ENSMUSG00000003746	Man1a	Protein processing in endoplasmic reticulum:KEGG-mmu04141
ENSMUSG00000007033	Hspa1l	Protein processing in endoplasmic reticulum:KEGG-mmu04141
ENSMUSG00000033307	Mif	Phenylalanine metabolism:KEGG-mmu00360
ENSMUSG00000031672	Got2	Phenylalanine metabolism:KEGG-mmu00360
ENSMUSG00000027985	Lef1	Adherens junction:KEGG-mmu04520
ENSMUSG00000031565	Fgfr1	Adherens junction:KEGG-mmu04520
ENSMUSG00000015143	Actn1	Adherens junction:KEGG-mmu04520
ENSMUSG00000017376	Nlk	Adherens junction:KEGG-mmu04520
ENSMUSG00000025372	Baiap2	Adherens junction:KEGG-mmu04520
ENSMUSG00000019843	Fyn	Adherens junction:KEGG-mmu04520
ENSMUSG00000059040	Gm5506	Glycolysis / Gluconeogenesis:KEGG-mmu00010
ENSMUSG00000062070	Pgk1	Glycolysis / Gluconeogenesis:KEGG-mmu00010
ENSMUSG00000069106	Gm8910	Glycolysis / Gluconeogenesis:KEGG-mmu00010
ENSMUSG00000020277	Pfkl	Glycolysis / Gluconeogenesis:KEGG-mmu00010
ENSMUSG00000063524	Eno1	Glycolysis / Gluconeogenesis:KEGG-mmu00010
ENSMUSG00000041798	Gck	Glycolysis / Gluconeogenesis:KEGG-mmu00010
ENSMUSG00000011752	Pgam1	Glycolysis / Gluconeogenesis:KEGG-mmu00010
ENSMUSG00000038205	Prkab2	Adipocytokine signaling pathway:KEGG-mmu04920
ENSMUSG00000020785	Camkk1	Adipocytokine signaling pathway:KEGG-mmu04920
ENSMUSG00000031672	Got2	Phenylalanine, tyrosine and tryptophan biosynthesis:KEGG-mmu00400
ENSMUSG00000059040	Gm5506	RNA degradation:KEGG-mmu03018
ENSMUSG00000063524	Eno1	RNA degradation:KEGG-mmu03018
ENSMUSG00000036438	Calm2	Phosphatidylinositol signaling system:KEGG-mmu04070
ENSMUSG00000041417	Pik3r1	Phosphatidylinositol signaling system:KEGG-mmu04070
ENSMUSG00000078816	Prkcc	Phosphatidylinositol signaling system:KEGG-mmu04070
ENSMUSG00000050965	Prkca	Phosphatidylinositol signaling system:KEGG-mmu04070
ENSMUSG00000019370	Calm3	Phosphatidylinositol signaling system:KEGG-mmu04070
ENSMUSG00000039936	Pik3cd	Phosphatidylinositol signaling system:KEGG-mmu04070
ENSMUSG00000022376	Adcy8	Taste transduction:KEGG-mmu04742
ENSMUSG00000059173	Pde1a	Taste transduction:KEGG-mmu04742
ENSMUSG00000020704	Accn1	Taste transduction:KEGG-mmu04742
ENSMUSG00000005034	Prkacb	Taste transduction:KEGG-mmu04742
ENSMUSG00000001175	Calm1	Vascular smooth muscle contraction:KEGG-mmu04270
ENSMUSG00000052920	Prkg1	Vascular smooth muscle contraction:KEGG-mmu04270
ENSMUSG00000022376	Adcy8	Vascular smooth muscle contraction:KEGG-mmu04270
ENSMUSG00000036438	Calm2	Vascular smooth muscle contraction:KEGG-mmu04270
ENSMUSG00000005580	Adcy9	Vascular smooth muscle contraction:KEGG-mmu04270
ENSMUSG00000078816	Prkcc	Vascular smooth muscle contraction:KEGG-mmu04270
ENSMUSG00000054934	Kcnmb4	Vascular smooth muscle contraction:KEGG-mmu04270
ENSMUSG00000050965	Prkca	Vascular smooth muscle contraction:KEGG-mmu04270
ENSMUSG00000019370	Calm3	Vascular smooth muscle contraction:KEGG-mmu04270
ENSMUSG00000041624	Gucy1a2	Vascular smooth muscle contraction:KEGG-mmu04270
ENSMUSG00000005034	Prkacb	Vascular smooth muscle contraction:KEGG-mmu04270
ENSMUSG00000022843	Clcn2	Mineral absorption:KEGG-mmu04978
ENSMUSG00000027533	Fabp5	PPAR signaling pathway:KEGG-mmu03320
ENSMUSG00000039037	St6galnac5	Glycosphingolipid biosynthesis - ganglio series:KEGG-mmu00604
ENSMUSG00000030283	St8sia1	Glycosphingolipid biosynthesis - ganglio series:KEGG-mmu00604
ENSMUSG00000013846	St3gal1	Glycosphingolipid biosynthesis - ganglio series:KEGG-mmu00604
ENSMUSG00000039474	Wfs1	Protein processing in endoplasmic reticulum:KEGG-mmu04141
ENSMUSG00000041556	Fbxo2	Protein processing in endoplasmic reticulum:KEGG-mmu04141
ENSMUSG00000020964	Sel1l	Protein processing in endoplasmic reticulum:KEGG-mmu04141
ENSMUSG00000023944	Hsp90ab1	Protein processing in endoplasmic reticulum:KEGG-mmu04141
ENSMUSG00000025757	Hspa4l	Protein processing in endoplasmic reticulum:KEGG-mmu04141
ENSMUSG00000015656	Hspa8	Protein processing in endoplasmic reticulum:KEGG-mmu04141
ENSMUSG00000021270	Hsp90aa1	Protein processing in endoplasmic reticulum:KEGG-mmu04141
ENSMUSG00000007033	Hspa1l	Protein processing in endoplasmic reticulum:KEGG-mmu04141
ENSMUSG00000057069	Ero1lb	Protein processing in endoplasmic reticulum:KEGG-mmu04141
ENSMUSG00000030104	Edem1	Protein processing in endoplasmic reticulum:KEGG-mmu04141
ENSMUSG00000003814	Calr	Protein processing in endoplasmic reticulum:KEGG-mmu04141
ENSMUSG00000003746	Man1a	Protein processing in endoplasmic reticulum:KEGG-mmu04141
ENSMUSG00000033307	Mif	Phenylalanine metabolism:KEGG-mmu00360
ENSMUSG00000031672	Got2	Phenylalanine metabolism:KEGG-mmu00360
ENSMUSG00000027985	Lef1	Adherens junction:KEGG-mmu04520
ENSMUSG00000031565	Fgfr1	Adherens junction:KEGG-mmu04520
ENSMUSG00000015143	Actn1	Adherens junction:KEGG-mmu04520
ENSMUSG00000017376	Nlk	Adherens junction:KEGG-mmu04520
ENSMUSG00000025372	Baiap2	Adherens junction:KEGG-mmu04520
ENSMUSG00000029580	Actb	Adherens junction:KEGG-mmu04520
ENSMUSG00000059040	Gm5506	Glycolysis / Gluconeogenesis:KEGG-mmu00010
ENSMUSG00000062070	Pgk1	Glycolysis / Gluconeogenesis:KEGG-mmu00010
ENSMUSG00000069106	Gm8910	Glycolysis / Gluconeogenesis:KEGG-mmu00010
ENSMUSG00000063524	Eno1	Glycolysis / Gluconeogenesis:KEGG-mmu00010
ENSMUSG00000020277	Pfkl	Glycolysis / Gluconeogenesis:KEGG-mmu00010
ENSMUSG00000041798	Gck	Glycolysis / Gluconeogenesis:KEGG-mmu00010
ENSMUSG00000011752	Pgam1	Glycolysis / Gluconeogenesis:KEGG-mmu00010
ENSMUSG00000063229	Ldha	Glycolysis / Gluconeogenesis:KEGG-mmu00010
ENSMUSG00000032294	Pkm2	Glycolysis / Gluconeogenesis:KEGG-mmu00010
ENSMUSG00000067713	Prkag1	Adipocytokine signaling pathway:KEGG-mmu04920
ENSMUSG00000038205	Prkab2	Adipocytokine signaling pathway:KEGG-mmu04920
ENSMUSG00000020785	Camkk1	Adipocytokine signaling pathway:KEGG-mmu04920
ENSMUSG00000031672	Got2	Phenylalanine, tyrosine and tryptophan biosynthesis:KEGG-mmu00400
